# Supplementary material for: Stem cell progeny contribute to the schistosome host-parasite interface
Source: eLife journal article supplement (doi:10.7554/elife.12473), 2016-03-19
Supplement: supp [file elife-12473-supp-v1.zip]

Archive with 6 entries (6 files):
- elife_poa_e12473_Supplementary_File_3.xlsx
- elife_poa_e12473_Supplementary_File_2.xlsx
- elife_poa_e12473_Figure_1_figure_supplement_2.pdf
- elife_poa_e12473_Supplementary_File_1.xlsx
- elife_poa_e12473_Figure_1_figure_supplement_1.pdf
- elife_poa_e12473_Figure_2_figure_supplement_1.pdf
