# Supplementary material for: Stem cell progeny contribute to the schistosome host-parasite interface
Source: eLife journal article supplement (doi:10.7554/elife.12473), 2016-03-19
Supplement: supp [file elife-12473-supp-v1.zip › elife_poa_e12473_Supplementary_File_1.xlsx]

## Sheet: Down Both 48 Hrs and 14 days
Feature ID	Fold Change 48hr Control vs 200gy	Fold Change D14 Control vs 200gy	Fold Change conrol vs H2B(RNAi)	Fold Change conrol vs fgfrA(RNAi)	Annotation	Ratio D14/48hrs Irradiation
Smp_095290	-1.63139	-∞	-∞	-33.4591	protein ovo	#VALUE!
Smp_146710	-1.66417	-∞	-34.1566	-5.16512	hypothetical protein	#VALUE!
Smp_139530	-2.14839	-144.279	-369.904	-9.08988	cellular tumor antigen P53	67.1568
Smp_194180	-2.06725	-105.734	-101.419	-9.92288	hypothetical protein	51.1469
Smp_131370	-1.74725	-31.5574	NS	-9.18365	hypothetical protein	18.0612
Smp_053640	-1.50464	-24.1784	-27.6443	-5.00944	hypothetical protein	16.0692
Smp_179710	-2.80517	-34.2882	-63.1242	-9.81981	Maternal Effect Lethal family member (mel 32)	12.2232
Smp_159640	-3.70266	-30.5089	-73.8009	-7.75621	synaptotagmin	8.23972
Smp_164170	-1.87294	-13.826	-15.95	-6.23505	endoglycoceramidase	7.382
Smp_187070	-2.56389	-16.1197	-21.0362	-8.08235	hypothetical protein	6.28718
Smp_187410	-1.98664	-12.45	-14.7197	-5.51408	hypothetical protein	6.26688
Smp_187010	-1.67184	-9.81366	-4.58667	-2.22538	hypothetical protein	5.86999
Smp_041540	-4.08889	-18.7229	-13.2981	-9.81248	Hormone receptor 4 (dHR4)	4.57895
Smp_193330	-14.7993	-63.081	-22.6155	-8.30068	kinesin II 85 kDa subunit	4.26242
Smp_125760	-5.07693	-16.8863	-15.7739	-5.40534	denticleless protein	3.32608
Smp_169410	-2.8105	-9.32185	-5.74164	-2.71043	hypothetical protein	3.31679
Smp_026400	-4.30253	-13.6676	NS	-25.6231	thyrotroph embryonic factor	3.17665
Smp_128160	-8.81971	-27.7646	-3.84694	-4.77084	CST complex subunit STN1	3.14802
Smp_129410	-10.483	-32.9501	-30.3091	-5.75757	hypothetical protein	3.1432
Smp_132950	-7.6529	-23.1218	-3.31454	-4.22748	hypothetical protein	3.02131
Smp_018170	-1.41028	-3.93919	-4.14473	-2.77912	zinc finger protein	2.7932
Smp_002930	-2.31946	-5.98719	NS	-3.30684	histone H2A	2.58129
Smp_120050	-1.91613	-4.67505	-5.75389	-4.09256	endoglycoceramidase	2.43985
Smp_135890	-2.17488	-5.20029	-6.16044	-3.11912	hypothetical protein	2.39108
Smp_024860	-1.56015	-3.57234	-4.86862	-4.55219	Basic helix loop helix transcription factor	2.28974
Smp_151560	-12.4768	-28.409	-37.1273	-7.68904	dna replication licensing factor mcm9	2.27694
Smp_026030	-3.98303	-8.69272	NS	-4.50027	DNA repair and recombination protein RAD54B	2.18244
Smp_176260	-12.0701	-25.8947	-30.3007	-6.44269	hypothetical protein	2.14536
Smp_141160	-7.06503	-15.0457	-7.35502	-4.28659	E3 ubiquitin protein ligase RNF168	2.12961
Smp_144160	-4.24741	-8.9884	-9.16677	-3.85928	hypothetical protein	2.11621
Smp_142820	-1.98909	-4.04706	-3.34673	-2.37976	hypothetical protein	2.03463
Smp_149260	-16.0574	-31.9185	-20.4028	-7.65444	kinesin family 1	1.98778
Smp_071890	-4.42691	-8.66122	-54.0742	-4.02702	hypothetical protein	1.95649
Smp_162340	-4.06881	-7.8966	-9.15569	-4.71586	serine:threonine protein kinase ATR	1.94076
Smp_138470	-3.49435	-6.51645	-6.31699	-3.98947	hypothetical protein	1.86485
Smp_137390	-8.47045	-15.2906	-18.5315	-5.22124	histone RNA hairpin binding protein	1.80517
Smp_028050	-2.59408	-4.56521	-3.64285	-2.84252	hypothetical protein	1.75986
Smp_149490	-3.65742	-6.36311	NS	-3.15763	hypothetical protein	1.73978
Smp_143460	-3.68645	-6.39781	-5.95804	-3.56771	disks large associated protein 5	1.73549
Smp_176000	-13.1013	-22.7242	-59.1223	-7.73761	abnormal spindle microcephaly associated	1.73449
Smp_056350	-4.50352	-7.66435	-7.19058	-5.4069	mitotic spindle assembly checkpoint protein	1.70186
Smp_040020	-2.33265	-3.95633	-3.7767	-2.62199	histone H3	1.69606
Smp_199870	-3.96381	-6.61376	-5.18755	-2.71144	hypothetical protein	1.66854
Smp_004060	-2.19254	-3.45406	-2.57005	-2.84721	cell division cycle 20	1.57537
Smp_009600	-12.7425	-19.957	-13.5436	-5.79351	serine:threonine protein kinase PLK1	1.56618
Smp_128870	-3.4474	-5.09394	-4.25636	-4.01689	nibrin	1.47762
Smp_082490	-21.3188	-31.4784	-86.8688	-8.62964	G2:mitotic specific cyclin B2	1.47656
Smp_021590	-40.0979	-58.525	-44.5756	-8.04207	Rac GTPase activating protein 1	1.45955
Smp_050380	-1.59652	-2.27353	NS	-1.79117	mitogen activated protein kinase kinase kinase	1.42405
Smp_135900	-4.85018	-6.75463	-7.71511	-3.117	DNA double strand break repair rad50 ATPase	1.39266
Smp_176010	-5.67936	-7.70013	NS	-3.6079	cytoskeleton associated protein 5	1.35581
Smp_169970	-11.1179	-15.0065	-13.5288	-7.43237	kinetochore protein ndc80	1.34976
Smp_128200	-6.69534	-8.98219	NS	-5.1629	kinesin protein kif23	1.34156
Smp_077180	-1.71573	-2.19676	-1.98447	-1.97534	serine:threonine protein kinase Chk1	1.28036
Smp_140240	-2.35747	-3.00125	-2.74542	-2.15153	hypothetical protein	1.27308
Smp_143490	-7.12625	-9.06315	-6.98451	-3.59784	DNA replication licensing factor MCM5	1.2718
Smp_065150	-15.7586	-19.3764	-29.5903	-11.7782	N acetyltransferase ESCO2	1.22958
Smp_148690	-1.69631	-2.07887	-1.913	-1.7324	#N/A	1.22553
Smp_154940	-6.05887	-7.42481	-5.49717	-3.29249	hypothetical protein	1.22544
Smp_086860	-69.5404	-84.7763	-249.584	-12.377	histone H2A	1.2191
Smp_153520	-17.7333	-21.4877	-19.5778	-7.08568	protein ect2	1.21172
Smp_176500	-2.01641	-2.43595	-2.06543	-1.88219	#N/A	1.20806
Smp_172610	-6.87196	-8.29845	-4.33266	-3.58433	hypothetical protein	1.20758
Smp_193360	-1.84879	-2.21047	-2.29693	-1.69551	Fanconi anemia group I protein	1.19563
Smp_079050	-2.72646	-3.20948	-2.72116	-2.3084	DNA primase large subunit	1.17716
Smp_073300	-1.57647	-1.80643	NS	-1.64488	Chaperone protein DnaJ 1	1.14587
Smp_016240	-2.274	-2.5782	-2.02018	NS	Fanconi anemia group I protein	1.13377
Smp_105360	-2.12932	-2.40217	-2.66299	-1.63717	neurogenic locus notch protein	1.12814
Smp_046280	-6.05082	-6.79557	-4.75231	-3.49072	actin binding protein anillin	1.12308
Smp_158950	-46.5713	-51.8155	-74.484	-7.66336	serine:threonine protein kinase haspin	1.11261
Smp_200410	-1.53654	-1.70295	NS	-1.59053	thymidylate synthase	1.10831
Smp_155500	-2.52096	-2.77398	-6.61141	-4.12797	DNA polymerase theta	1.10037
Smp_052390	-2.76646	-3.04199	-3.44261	-3.27758	origin recognition complex subunit 5	1.09959
Smp_032500	-2.0296	-2.22555	-1.76764	-1.92446	DNA replication licensing factor MCM7	1.09655
Smp_155390	-11.2854	-12.1244	-5.73632	-4.12217	hypothetical protein	1.07434
Smp_033700	-1.3477	-1.43956	NS	-1.50748	deoxyribodipyrimidine photo lyase	1.06816
Smp_054010	-2.45622	-2.61145	-3.02388	-2.33898	y+l amino acid transporter 2	1.0632
Smp_157300	-1.92284	-2.03991	-1.92382	-1.8731	basic fibroblast growth factor receptor 1 A	1.06089
Smp_018930	-1.49773	-1.58472	NS	-1.59247	hypothetical protein	1.05808
Smp_051920	-4.85612	-5.1076	-4.75542	-4.48453	nanos 2	1.05178
Smp_154080	-32.7259	-34.3987	-37.4806	-11.0975	hypothetical protein	1.05111
Smp_013970	-25.5963	-26.7758	-28.0412	-7.00105	#N/A	1.04608
Smp_079560	-23.6594	-24.7239	-15.2656	-7.47122	DNA replication licensing factor MCM2	1.04499
Smp_054840	-1.56995	-1.63143	-1.65207	-1.49425	DNA replication licensing factor MCM2	1.03916
Smp_046500	-1.34105	-1.35232	-1.45525	-1.39637	proliferating cell nuclear antigen	1.00841
Smp_125040	-1.62948	-1.64127	-1.56244	-1.63752	Epa2p protein	1.00723
Smp_173450	-5.6949	-5.7305	-8.46755	-3.31103	chromosome associated kinesin KIF4A	1.00625
Smp_119910	-10.1595	-10.2129	-7.94044	-4.56454	#N/A	1.00526
Smp_162860	-2.36517	-2.37066	-2.10028	NS	hypothetical protein	1.00232
Smp_042810	-1.75478	-1.73611	-2.09311	-1.43816	chromosome transmission fidelity protein 18	0.989361
Smp_076600	-4.21506	-4.16657	-4.31096	-3.22968	transcription factor SOX 14	0.988496
Smp_047620	-6.82134	-6.74242	-7.10135	-4.10426	G2:mitotic specific cyclin B3	0.988431
Smp_174820	-4.93518	-4.87695	-4.17731	-4.19157	hypothetical protein	0.988201
Smp_171370	-3.82513	-3.70879	-3.27988	-2.61413	serine:threonine protein kinase Chk2	0.969586
Smp_210110	-2.70096	-2.61465	NS	-2.30013	mitotic checkpoint serine:threonine protein	0.968047
Smp_162550	-1.45755	-1.37799	-1.30492	-1.2387	protocadherin alpha 7	0.945417
Smp_182600	-1.49644	-1.4071	-1.75536	-1.36231	anaphase promoting complex subunit 6	0.940296
Smp_174910	-1.89085	-1.76896	-2.31059	-1.92727	importin subunit alpha 2	0.935538
Smp_133660	-3.14057	-2.92613	-3.16821	-2.45329	protein lin 9	0.931718
Smp_072560	-5.57735	-5.19219	-4.57786	-4.13384	hypothetical protein	0.930941
Smp_157180	-6.17367	-5.74161	NS	-4.19451	hypothetical protein	0.930015
Smp_069600	-1.90005	-1.76573	-1.88922	-1.51999	ATP dependent DNA helicase Q4	0.929305
Smp_175590	-3.0941	-2.86662	-2.39222	-12.8911	fibroblast growth factor receptor a	0.926479
Smp_146160	-1.75487	-1.59975	-1.45011	-1.27455	Fanconi anemia group D2 protein	0.911603
Smp_178260	-4.36713	-3.94615	-5.1453	-3.48684	DNA polymerase alpha catalytic subunit	0.903602
Smp_016870	-30.8156	-27.6723	-54.4486	-7.47785	protein regulator of cytokinesis 1	0.897996
Smp_124300	-1.61167	-1.42571	NS	-1.36496	Lamin B receptor (ERG24)	0.88462
Smp_094140	-2.72145	-2.40046	-3.47865	-2.425	DNA replication licensing factor MCM6	0.882052
Smp_132510	-3.47122	-3.05682	-2.26326	-1.63701	breast cancer type 1 susceptibility protein	0.880616
Smp_075110	-2.64025	-2.30076	-2.1624	-1.72099	cell cycle checkpoint protein rad1	0.871417
Smp_129710	-20.2139	-17.5589	-15.5107	-6.18654	Uveal autoantigen with coiled coil domains	0.868654
Smp_156750	-1.82129	-1.57572	-1.88258	-1.68539	hypothetical protein	0.865166
Smp_145470	-13.8897	-11.841	-8.64441	-4.66346	zinc finger protein	0.852501
Smp_047610	-6.20578	-5.24997	-12.958	-6.19057	cell division control protein 45	0.845981
Smp_148590	-3.6331	-3.07272	-2.97084	-2.65045	hypothetical protein	0.845759
Smp_133990	-8.33945	-6.98427	-5.10787	-5.235	DNA topoisomerase 2 binding protein 1	0.837498
Smp_179320	-7.24339	-6.06109	-6.13106	-4.16403	argonaute 2-1	0.836775
Smp_164040	-1.60855	-1.33952	NS	-1.40335	hypothetical protein	0.832752
Smp_164950	-1.86333	-1.55091	-1.52897	-1.6754	hypothetical protein	0.832332
Smp_080730	-4.72737	-3.90672	-3.01803	-2.79944	cyclin dependent kinase 1	0.826405
Smp_109090	-1.55819	-1.27838	NS	-1.25413	protein disulfide isomerase	0.820425
Smp_127070	-2.23437	-1.82182	-1.73332	-1.64729	origin recognition complex subunit	0.815362
Smp_109320	-1.85639	-1.5099	-1.51773	-1.33337	WDFY family	0.813354
Smp_154090	-14.5483	-11.3075	-7.81934	NS	protein of unknown function DUF729	0.777238
Smp_128210	-3.88637	-2.99997	-4.05626	-2.22129	claspin protein	0.771922
Smp_172530	-14.5789	-10.9419	-26.8621	-5.36672	DNA replication licensing factor MCM4	0.750535
Smp_137090	-3.1351	-2.25603	-3.6033	-1.97125	BRCA1 associated RING domain protein 1	0.719604
Smp_194820	-16.0951	-11.5396	-11.7943	-6.4248	dna repair and recombination protein rad54	0.716964
Smp_181870	-2.32097	-1.61205	-2.83294	-1.53316	dna replication licensing factor mcm8	0.694558
Smp_151360	-7.5134	-5.20056	-13.4243	-3.97747	hypothetical protein	0.692171
Smp_124280	-3.36121	-2.31592	NS	-2.00456	hypothetical protein	0.689013
Smp_151320	-2.74557	-1.78359	-2.04153	-1.71346	targeting protein for Xklp2	0.649625
Smp_054610	-13.6966	-8.44065	-4.73528	-3.30394	WD repeat and HMG box DNA binding protein 1	0.616257
Smp_067260	-4.29627	-2.55655	-5.5524	-3.27786	dna polymerase alpha subunit b	0.595062
Smp_141430	-29.6053	-5.02935	-5.86989	-4.60828	hypothetical protein	0.16988

## Sheet: Down 14 days not 48 hrs
Feature ID- D14 Irr down 1.25 (p<0.05 t-test)	Fold Change 48hr Control vs 200gy	Fold Change D14 Control vs 200gy	Fold Change conrol vs H2B(RNAi) <0.05 t-test	Fold Change conrol vs fgfrA(RNAi) <0.05 t-test	Annotation
Smp_156930	1.10212	-927.33	-407.418	-7.22091	hypothetical protein
Smp_123550	2.00403	-519.214	-312.375	-12.7981	Venom allergen-like protein 8
Smp_195180	1.21538	-402.714	-787.766	-10.7111	Sm25
Smp_141500	1.3839	-369.135	-751.975	-10.0256	hypothetical protein
Smp_166860	1.01882	-354.519	-969.862	-5.18904	hypothetical protein
Smp_195190	1.33714	-239.177	-1224.42	-10.4761	13 kDa tegumental antigen Sm13
Smp_101970	1.13817	-220.577	-291.514	-11.1287	Placenta specificprotein 8 protein (C15 protein)
Smp_123540	1.35534	-189.888	-∞	-9.42309	venom allergen-like (VAL) protein 12
Smp_122630	-1.18568	-68.544	-38.5707	-6.02949	MEG 1
Smp_069120	1.27969	-52.8857	-71.0947	-8.62279	synaptotagmin 2
Smp_203440	1.38527	-36.1865	-136.52	-12.4318	hypothetical protein
Smp_003230	1.17192	-24.4308	-53.9762	-8.26027	SH3 domain GRB2 endophilin B1
Smp_159490	-1.11323	-23.7588	-23.9764	-4.72419	polypeptide GalNAc transferase 6
Smp_181530	1.33548	-16.8029	-12.8742	-5.77719	Sm-TSP-2
Smp_160930	-1.02894	-11.9103	NS	-4.21757	hypothetical protein
Smp_151440	-1.10725	-11.9065	-5.60026	-4.88671	hypothetical protein
Smp_146460	1.0269	-6.04963	-37.5966	-5.125	tegumental antigen
Smp_081920	1.08432	-5.84775	-11.428	-5.51289	hypothetical protein
Smp_077860	1.16779	-5.52902	-5.02406	-3.77062	actin
Smp_203380	1.26376	-4.91397	-5.49192	-3.39132	hypothetical protein
Smp_179110	1.41258	-4.03337	-8.50985	-6.28064	purine nucleoside phosphorylase
Smp_165340	-1.19732	-3.96531	NS	-3.55433	alpha tocopherol transfer protein
Smp_017720	1.03123	-3.66109	NS	-2.34552	zinc finger protein
Smp_014080	-1.06297	-3.53562	-4.58743	-2.31945	lipopolysaccharide induced tumor necrosis
Smp_138780	-1.16874	-3.16328	-2.03935	NS
Smp_176940	1.18246	-3.1025	-5.31769	-2.98175	cationic amino acid transporter
Smp_074710	1.03437	-2.98474	-3.39535	-3.50125	Def8 protein
Smp_169510	-1.0085	-2.92309	-2.90907	-2.17561	PI3kinase
Smp_145810	-1.22655	-2.79671	-2.94283	-2.25582	poly (adp ribose) polymerase 2
Smp_132830	3.36774	-2.78184	-2.79037	-2.2161	STARP antigen
Smp_177250	-1.03298	-2.76513	-2.30317	-2.09867
Smp_176450	-1.0588	-2.75377	NS	-2.71869	ATP binding cassette sub family A
Smp_022450	1.09196	-2.71332	-5.04611	-2.70493	hypothetical protein
Smp_158890	-1.15766	-2.62938	-1.85408	-1.72542	MEG 16
Smp_135530	-1.08405	-2.5767	-2.73913	-2.03495	leishmanolysin peptidase
Smp_137320	1.11362	-2.56487	NS	-1.9558	amine GPCR
Smp_144960	-1.23115	-2.3889	-2.845	-2.10961	FTS and Hook interacting protein
Smp_132080	-1.05981	-2.12527	-2.11911	-1.71196	Sugar transporter
Smp_141710	-1.2064	-2.11654	NS	-1.60649	kinetochore associated protein 1
Smp_163820	1.04821	-2.0708	-1.94591	NS	phospholipid transporting ATPase IF
Smp_067010	1.04094	-2.0449	-2.01846	-1.81065	RUN domain containing protein 1
Smp_049580	-1.02603	-2.0431	-2.37575	-1.7025	zinc finger protein
Smp_059600	1.07082	-2.0169	NS	-1.84789	tektin 3
Smp_072190	1.26603	-1.93526	-2.1213	-1.91542	membrane associated protein 29
Smp_163710	1.0293	-1.85778	-3.37172	-1.98159	MEG 6
Smp_149400	1.02523	-1.84703	-2.05022	-1.88249	subfamily S8B unassigned peptidase (S08 family)
Smp_141700	-1.15699	-1.79112	NS	-1.84864
Smp_061970	1.05122	-1.75073	-1.92847	-1.4393	GPI ethanolamine phosphate transferase 2
Smp_204160	1.31403	-1.74695	NS	-1.85077	aspartate ammonia ligase
Smp_155490	1.08229	-1.69858	-2.09307	-1.62464
Smp_148080	1.04305	-1.68485	-2.12805	-2.06177	hypothetical protein
Smp_167320	-1.21084	-1.62994	-1.45754	NS	serine threonine rich antigen
Smp_161340	1.10865	-1.62864	NS	-1.73136	Sm29
Smp_173610	1.35432	-1.61507	-1.58242	-1.60485	hypothetical protein
Smp_095500	1.11842	-1.59561	NS	-2.10129	dynein light chain
Smp_158440	-1.1135	-1.58373	-1.90161	-1.72645	Transcription initiation factor TFIID subunit 3
Smp_051810	1.15406	-1.56936	-1.52906	-1.74947	elongation of very long chain fatty acids
Smp_093780	-1.2482	-1.55241	-2.06961	-2.40314	peroxiredoxins, prx 1, prx 2, prx 3
Smp_117920	1.30046	-1.54869	NS	-1.40057	steroid dehydrogenase
Smp_090520	-1.04466	-1.53878	NS	-1.58757	purine nucleoside phosphorylase
Smp_180620	-1.04922	-1.53339	NS	-1.88979	MEG 17
Smp_129010	-1.07707	-1.53257	-1.67731	-1.60327	hypothetical protein
Smp_145920	-1.0365	-1.52864	-2.54471	-1.71821	protein tyrosine sulfotransferase
Smp_159630	-1.19102	-1.48755	-1.32712	-1.21536	hypothetical protein
Smp_127190	1.13678	-1.48406	-1.59819	-1.31269	hypothetical protein
Smp_035290	1.04187	-1.47401	NS	-2.26621	hypothetical protein
Smp_152670	-1.2416	-1.45812	NS	-1.33382	crossover junction endonuclease EME1
Smp_132740	1.11154	-1.44277	NS	-1.44389	fatty acid desaturase 2
Smp_162710	-1.20147	-1.43616	-1.51918	-1.28158	serine:threonine protein kinase 6
Smp_149780	1.1964	-1.42226	-1.78966	-1.48336	synaptotagmin protein
Smp_160360	1.14205	-1.41835	NS	-1.31277	sodium:chloride dependent neurotransmitter
Smp_171860	-1.04124	-1.41699	-1.32644	-1.32861	hypothetical protein
Smp_106040	-1.19696	-1.41598	NS	-1.26664	Structure specific endonuclease SLX1
Smp_147670	1.02321	-1.41135	-2.0818	-1.50372	Receptor kinase I-interacting protein SIP
Smp_005720	1.05838	-1.40496	-1.28194	-1.26633	Aquaporin 3 (AQP 3)
Smp_141010	1.0982	-1.40315	-1.28972	-1.30205	dysferlin1
Smp_178800	-1.15822	-1.40129	-1.69642	NS	rest corepressor (corest) protein
Smp_037780	1.01444	-1.40023	-1.3844	-1.45315	hypothetical protein
Smp_122050	1.03448	-1.39564	NS	-1.29127	lag1 longevity assurance 1
Smp_078920	-1.14463	-1.39155	NS	-1.4478	condensin complex subunit 3
Smp_039620	1.06262	-1.38453	NS	-1.54349	lysosome associated membrane glycoprotein
Smp_045550	1.0481	-1.37759	-1.55278	-1.32796	annexin
Smp_147230	-1.10902	-1.37137	-1.52439	-1.30144	ATP dependent DNA helicase PIF1
Smp_031250	1.24722	-1.35739	-1.2572	NS	hypothetical protein
Smp_099090	1.01859	-1.35606	NS	-1.33428	hypothetical protein
Smp_205700	1.15146	-1.33718	NS	-1.38824	hypothetical protein
Smp_145910	-1.07882	-1.32984	-2.57525	-1.85213	protein tyrosine sulfotransferase
Smp_152080	-1.08016	-1.32776	NS	-1.51381	hypothetical protein
Smp_143740	1.17395	-1.3234	-1.67719	NS	uroporphyrinogen decarboxylase
Smp_206290	1.14274	-1.31862	-1.43927	NS	synaptotagmin protein 5 like
Smp_126910	1.00767	-1.3176	-1.49313	NS	periodic tryptophan protein 2
Smp_091870	-1.20175	-1.3157	NS	-1.37804	hypothetical protein
Smp_060290	1.15167	-1.30764	-1.83036	-1.38626	josephin protein like
Smp_197730	-1.01923	-1.30752	-1.44772	-1.46876	rrm containing protein seb 4
Smp_099800	-1.02647	-1.3022	-1.26379	-1.19724
Smp_087010	-1.07745	-1.30159	-1.44725	-1.25489	DNA polymerase delta catalytic subunit
Smp_149420	-1.02224	-1.29827	-1.33239	-1.26041	held out wings
Smp_176890	-1.02428	-1.29485	-1.52773	-1.56563	hypothetical protein
Smp_035550	1.082	-1.2896	NS	-1.66454	hypothetical protein
Smp_199090	1.01603	-1.28443	-1.48996	-1.3304	peptidyl glycine alpha amidating
Smp_160880	1.03662	-1.27687	-2.25795	-1.441	phosphatidylcholine sterol acyltransferase
Smp_136180	-1.10046	-1.26925	-1.32679	-1.15363	dna polymerase eta
Smp_002810	-1.15769	-1.26314	NS	-1.41368	fidgetin protein 1
Smp_172970	1.0115	-1.25614	NS	-1.39515	hypothetical protein
Smp_155620	1.12154	-1.2536	-1.66187	-1.42662	hypothetical protein
