# Supplementary material for: Stem cell progeny contribute to the schistosome host-parasite interface
Source: eLife journal article supplement (doi:10.7554/elife.12473), 2016-03-19
Supplement: supp [file elife-12473-supp-v1.zip › elife_poa_e12473_Supplementary_File_2.xlsx]

## Sheet: Control D14 vs. 200 Gy D14
Feature ID	Experiment - Fold Change (original values)	t-test: Control D14 vs 200 Gy D14 original values - P-value	Annotations - Database object name	Control A- Expression values	Control A- Transcripts annotated	Control A- Detected transcripts	Control A- Exon length	Control A- Unique gene reads	Control A- Total gene reads	Control A- Unique exon reads	Control A- Total exon reads	Control A- Ratio of unique to total (exon reads)	Control A- Unique exon-exon reads	Control A- Total exon-exon reads	Control A- Unique intron-exon reads	Control A- Total intron-exon reads	Control A- Exons	Control A- RPKM	Control A- Median coverage	Control A- Chromosome	Control A- Chromosome region start	Control A- Chromosome region end	Control B- Expression values	Control B- Transcripts annotated	Control B- Detected transcripts	Control B- Exon length	Control B- Unique gene reads	Control B- Total gene reads	Control B- Unique exon reads	Control B- Total exon reads	Control B- Ratio of unique to total (exon reads)	Control B- Unique exon-exon reads	Control B- Total exon-exon reads	Control B- Unique intron-exon reads	Control B- Total intron-exon reads	Control B- Exons	Control B- RPKM	Control B- Median coverage	Control B- Chromosome	Control B- Chromosome region start	Control B- Chromosome region end	Control C- Expression values	Control C- Transcripts annotated	Control C- Detected transcripts	Control C- Exon length	Control C- Unique gene reads	Control C- Total gene reads	Control C- Unique exon reads	Control C- Total exon reads
Smp_156930	-927.33	5.57165e-05	hypothetical protein	45.6053	1	1	255	899	911	326	326	1	156	156	9	9	4	45.6053	130	Schisto_mansoni.Chr_5	5049607	5063593	52.5304	1	1	255	902	912	329	329	1	163	163	9	9	4	52.5304	119	Schisto_mansoni.Chr_5	5049607	5063593	55.0774	1	1	255	822	835	333	333
SmVAL8	-519.214	0.000544394	venom allergen-like (VAL) 8 protein	7.73877	1	1	862	170	188	170	187	0.909091	170	170	0	0	5	7.73877	23	Schisto_mansoni.Chr_3	24193076	24196233	7.51008	1	1	862	139	160	139	159	0.874214	139	139	0	1	5	7.51008	20	Schisto_mansoni.Chr_3	24193076	24196233	10.1282	1	1	862	173	211	173	207
Sm25	-402.714	2.46619e-06	surface membrane antigen	267.599	1	1	670	5026	5026	5026	5026	1	0	0	0	0	1	267.599	679.5	Schisto_mansoni.Chr_6	2112243	2112912	259.847	1	1	670	4276	4276	4276	4276	1	0	0	0	0	1	259.847	501.5	Schisto_mansoni.Chr_6	2112243	2112912	283.086	1	1	670	4497	4497	4497	4497
Smp_141500	-369.135	8.20387e-07	Hypothetical Schistosoma spp. protein UPF0506	273.891	2	2	447	3472	3472	3432	3432	1	1221	1221	15	15	4	273.891	896	Schisto_mansoni.Chr_6	12582693	12583784	272.527	2	2	447	3025	3025	2992	2992	1	1076	1076	11	11	4	272.527	794	Schisto_mansoni.Chr_6	12582693	12583784	289.196	2	2	447	3095	3095	3065	3065
Smp_166860	-354.519	6.11987e-05		36.0387	1	1	390	1165	1170	394	394	1	213	213	40	40	10	36.0387	70	Schisto_mansoni.SC_0224	39199	60902	35.8084	1	1	390	1003	1007	343	343	1	178	178	26	26	10	35.8084	56	Schisto_mansoni.SC_0224	39199	60902	42.3927	1	1	390	991	1000	392	392
Sm13	-239.177	2.11741e-05		428.618	1	1	393	4722	4722	4722	4722	1	1326	1326	46	46	2	428.618	1376	Schisto_mansoni.Chr_6	2102009	2102446	417.303	1	1	393	4028	4028	4028	4028	1	1156	1156	30	30	2	417.303	1157	Schisto_mansoni.Chr_6	2102009	2102446	479.502	1	1	393	4468	4468	4468	4468
Smp_101970	-220.577	2.3903e-05		176.618	1	1	674	3581	3698	3337	3337	1	1333	1333	14	14	3	176.618	555	Schisto_mansoni.Chr_W	25009922	25017600	172.767	1	1	674	3093	3213	2860	2860	1	1178	1178	7	7	3	172.767	488.5	Schisto_mansoni.Chr_W	25009922	25017600	198.93	1	1	674	3397	3511	3179	3179
SmVAL12	-189.888	0.000344377	venom allergen-like (VAL) protein 12	14.8492	1	1	615	233	265	233	256	0.910156	233	233	0	2	5	14.8492	46	Schisto_mansoni.Chr_3	24203525	24207464	10.9235	1	1	615	149	170	149	165	0.90303	149	151	0	2	5	10.9235	28	Schisto_mansoni.Chr_3	24203525	24207464	13.0301	1	1	615	169	201	169	190
Smp_139530	-144.279	1.15259e-05	cellular tumor antigen P53, putative	8.76893	1	1	2091	680	680	514	514	1	93	93	4	4	8	8.76893	23	Schisto_mansoni.SC_0125	317045	336139	7.88598	1	1	2091	556	558	405	405	1	83	83	2	2	8	7.88598	19	Schisto_mansoni.SC_0125	317045	336139	7.84631	1	1	2091	521	521	389	389
Smp_194180	-105.734	0.000477491	hypothetical protein	4.01947	1	1	426	40	48	40	48	0.833333	0	0	0	0	1	4.01947	7	Schisto_mansoni.Chr_2.unplaced.SC_0108	1153751	1154176	4.68319	1	1	426	44	49	44	49	0.897959	0	0	0	0	1	4.68319	6	Schisto_mansoni.Chr_2.unplaced.SC_0108	1153751	1154176	3.36619	1	1	426	33	34	33	34
Smp_086860	-84.7763	2.79469e-05	histone H2A, putative	23.9037	1	1	488	327	327	327	327	1	0	0	0	0	1	23.9037	75	Schisto_mansoni.Chr_1	48129894	48130381	20.9416	1	1	488	251	251	251	251	1	0	0	0	0	1	20.9416	63.5	Schisto_mansoni.Chr_1	48129894	48130381	24.286	1	1	488	281	281	281	281
Smp_122630	-68.544	0.000315079	MEG-1 family	22.7727	1	1	542	648	657	346	346	1	154	154	106	106	15	22.7727	45	Schisto_mansoni.Chr_1	64283320	64301309	30.1231	1	1	542	642	647	401	401	1	216	216	101	101	15	30.1231	61	Schisto_mansoni.Chr_1	64283320	64301309	24.7456	1	1	542	570	575	318	318
Smp_193330	-63.081	7.47072e-05	hypothetical protein	1.94933	1	1	366	20	20	20	20	1	0	0	0	0	1	1.94933	6	Schisto_mansoni.SC_0455	541	906	2.22487	1	1	366	20	20	20	20	1	0	0	0	0	1	2.22487	6	Schisto_mansoni.SC_0455	541	906	1.84378	1	1	366	16	16	16	16
Smp_021590	-58.525	3.60348e-06	rac gtpase activating protein, putative	3.5498	1	1	2040	260	267	203	203	1	86	86	1	1	9	3.5498	10	Schisto_mansoni.Chr_W	588622	599092	3.75217	1	1	2040	249	256	188	188	1	80	80	0	0	9	3.75217	10	Schisto_mansoni.Chr_W	588622	599092	3.88685	1	1	2040	238	245	188	188
Smp_069120	-52.8857	7.5948e-05	synaptotagmin, putative	14.7836	1	1	1373	569	569	569	569	1	0	0	0	0	1	14.7836	42	Schisto_mansoni.SC_0156	562331	563703	13.2257	1	1	1373	446	446	446	446	1	0	0	0	0	1	13.2257	28	Schisto_mansoni.SC_0156	562331	563703	12.0723	1	1	1373	393	393	393	393
Smp_158950	-51.8155	4.61814e-05	kinase, putative	0.752836	1	1	1848	47	47	39	39	1	22	22	6	6	14	0.752836	2	Schisto_mansoni.SC_0167	184073	208035	0.859246	1	1	1848	52	53	39	39	1	23	23	9	9	14	0.859246	2	Schisto_mansoni.SC_0167	184073	208035	0.730328	1	1	1848	46	46	32	32
Smp_203440	-36.1865	0.000407397		34.668	1	1	213	207	207	207	207	1	0	0	0	0	1	34.668	98	Schisto_mansoni.Chr_W	12385559	12385771	29.4372	1	1	213	154	154	154	154	1	0	0	0	0	1	29.4372	71	Schisto_mansoni.Chr_W	12385559	12385771	40.1963	1	1	213	203	203	203	203
Smp_182090	-35.5873	0.00591707		2.59754	1	1	206	15	15	15	15	1	0	0	0	0	1	2.59754	6	Schisto_mansoni.SC_0430	6675	6880	3.75527	1	1	206	19	19	19	19	1	0	0	0	0	1	3.75527	9	Schisto_mansoni.SC_0430	6675	6880	2.0474	1	1	206	10	10	10	10
Smp_154080	-34.3987	0.000131073	hypothetical protein	1.77321	1	1	684	133	133	34	34	1	17	17	0	0	5	1.77321	0	Schisto_mansoni.Chr_6	10643290	10646824	1.96432	1	1	684	121	122	33	33	1	14	14	4	4	5	1.96432	0	Schisto_mansoni.Chr_6	10643290	10646824	2.21981	1	1	684	133	133	36	36
Smp_179710	-34.2882	9.70457e-05	serine hydroxymethyltransferase putative	2.74944	1	1	1531	176	176	118	118	1	60	60	6	6	9	2.74944	8	Schisto_mansoni.Chr_3	5960451	5981344	2.73916	1	1	1531	158	158	103	103	1	50	50	5	5	9	2.73916	7	Schisto_mansoni.Chr_3	5960451	5981344	3.27825	1	1	1531	163	164	119	119
Smp_129410	-32.9501	0.000495175		4.02109	1	1	621	80	80	70	70	1	39	39	7	7	6	4.02109	12	Schisto_mansoni.Chr_3	8523203	8525941	5.50735	1	1	621	90	90	84	84	1	47	47	7	7	6	5.50735	15	Schisto_mansoni.Chr_3	8523203	8525941	4.55043	1	1	621	73	73	67	67
Smp_143940	-32.221	0.00202109	dynein light intermediate chain, putative	0.512817	1	1	1113	92	92	16	16	1	3	3	7	7	8	0.512817	1	Schisto_mansoni.Chr_5	7356788	7373912	0.365814	1	1	1113	85	85	10	10	1	4	4	2	2	8	0.365814	1	Schisto_mansoni.Chr_5	7356788	7373912	0.341049	1	1	1113	49	49	9	9
Smp_149260	-31.9185	1.238e-05	kinesin eg-5, putative	2.15709	1	1	1323	87	87	80	80	1	20	20	8	8	7	2.15709	6	Schisto_mansoni.Chr_4	5503443	5507558	2.24656	1	1	1323	73	73	73	73	1	30	30	3	3	7	2.24656	5	Schisto_mansoni.Chr_4	5503443	5507558	2.0084	1	1	1323	68	68	63	63
Smp_131370	-31.5574	2.00306e-07	hypothetical protein	1.88535	1	1	719	48	49	38	38	1	20	20	2	2	5	1.88535	5	Schisto_mansoni.Chr_6	17383186	17389706	1.81207	1	1	719	36	36	32	32	1	20	20	2	2	5	1.81207	4	Schisto_mansoni.Chr_6	17383186	17389706	1.81845	1	1	719	35	35	31	31
Smp_082490	-31.4784	1.47347e-05	cyclin B, putative	7.97909	1	1	1301	291	291	291	291	1	130	130	2	2	6	7.97909	23	Schisto_mansoni.Chr_3	2388466	2389937	9.1069	1	1	1301	291	291	291	291	1	114	114	1	1	6	9.1069	22	Schisto_mansoni.Chr_3	2388466	2389937	8.59089	1	1	1301	265	265	265	265
Smp_159640	-30.5089	7.82262e-05	hypothetical protein	3.71162	1	1	519	68	68	54	54	1	0	0	12	12	2	3.71162	9	Schisto_mansoni.SC_0156	584363	585493	3.13796	1	1	519	46	46	40	40	1	0	0	9	9	2	3.13796	6	Schisto_mansoni.SC_0156	584363	585493	3.41312	1	1	519	48	48	42	42
Smp_151560	-28.409	1.8901e-05	DNA replication licensing factor MCM1, putative	0.797392	1	1	2550	99	99	57	57	1	2	2	1	1	5	0.797392	2	Schisto_mansoni.Chr_1	63280691	63298991	0.766401	1	1	2550	84	84	48	48	1	2	2	3	3	5	0.766401	2	Schisto_mansoni.Chr_1	63280691	63298991	0.69467	1	1	2550	69	70	42	42
Smp_127670	-27.8963	0.00301764	hypothetical protein	0.80465	1	1	399	26	26	9	9	1	8	8	1	1	4	0.80465	2	Schisto_mansoni.Chr_7	975721	983585	1.32656	1	1	399	27	27	13	13	1	9	9	2	2	4	1.32656	3	Schisto_mansoni.Chr_7	975721	983585	1.26846	1	1	399	30	30	12	12
Smp_128160	-27.7646	0.000236375	hypothetical protein	0.464703	1	1	1305	52	52	17	17	1	7	7	4	4	10	0.464703	1	Schisto_mansoni.Chr_2	27076474	27089733	0.592786	1	1	1305	37	37	19	19	1	11	11	1	1	10	0.592786	1	Schisto_mansoni.Chr_2	27076474	27089733	0.581744	1	1	1305	35	35	18	18
Smp_016870	-27.6723	4.05082e-05	protein regulator of cytokinesis 1 prc1, putative	2.89399	1	1	1812	185	186	147	147	1	56	56	1	1	9	2.89399	7	Schisto_mansoni.Chr_6	17573132	17584183	2.98847	1	1	1812	168	170	133	133	1	43	43	0	0	9	2.98847	8	Schisto_mansoni.Chr_6	17573132	17584183	2.5371	1	1	1812	134	140	109	109
Smp_013970	-26.7758	4.101e-06		3.96691	1	1	1214	177	180	135	135	1	36	36	2	2	5	3.96691	12	Schisto_mansoni.Chr_2.unplaced.SC_0120	657192	667783	3.75625	1	1	1214	147	147	112	112	1	19	19	4	4	5	3.75625	10	Schisto_mansoni.Chr_2.unplaced.SC_0120	657192	667783	4.13426	1	1	1214	150	150	119	119
Smp_176260	-25.8947	2.65659e-05	hypothetical protein	8.69083	2	2	706	172	172	172	172	1	108	108	2	2	8	8.69083	23	Schisto_mansoni.SC_0207	7392	9587	10.0923	2	2	706	176	176	175	175	1	121	121	4	4	8	10.0923	28	Schisto_mansoni.SC_0207	7392	9587	9.67788	2	2	706	163	163	162	162
Smp_079560	-24.7239	1.56956e-06	DNA replication licensing factor MCM2, putative	5.56473	1	1	1827	280	285	280	285	0.982456	127	127	1	1	8	5.56473	18	Schisto_mansoni.Chr_1	42887839	42891123	5.32616	1	1	1827	236	241	234	239	0.979079	113	113	0	0	8	5.32616	14	Schisto_mansoni.Chr_1	42887839	42891123	5.19414	1	1	1827	223	225	223	225
Smp_157190	-24.5312	0.0114024	hypothetical protein	0.483934	1	1	516	7	7	7	7	1	1	1	1	1	4	0.483934	1	Schisto_mansoni.Chr_W	37837617	37838344	0.946862	1	1	516	12	12	12	12	1	3	3	2	2	4	0.946862	2	Schisto_mansoni.Chr_W	37837617	37838344	0.572161	1	1	516	7	7	7	7
Smp_003230	-24.4308	2.71523e-05	sh3 domain grb2-like protein B1 (endophilin B1)	93.637	1	1	1061	3788	3790	2785	2785	1	2025	2025	112	112	8	93.637	288	Schisto_mansoni.Chr_1	8599604	8616274	88.1072	1	1	1061	3141	3142	2296	2296	1	1674	1674	100	100	8	88.1072	241	Schisto_mansoni.Chr_1	8599604	8616274	102.519	1	1	1061	3400	3400	2579	2579
Smp_053640	-24.1784	7.68181e-08		8.8225	1	1	2050	604	604	507	507	1	82	82	14	14	5	8.8225	26	Schisto_mansoni.Chr_4	14186543	14192147	8.54023	1	1	2050	515	515	430	430	1	81	81	5	5	5	8.54023	21	Schisto_mansoni.Chr_4	14186543	14192147	8.74389	1	1	2050	502	502	425	425
Smp_159490	-23.7588	7.57813e-07	n-acetylgalactosaminyltransferase, putative	3.2717	1	1	1581	167	167	145	145	1	11	11	0	0	3	3.2717	9	Schisto_mansoni.Chr_W	10087661	10095594	3.29635	1	1	1581	144	144	128	128	1	13	13	4	4	3	3.29635	8	Schisto_mansoni.Chr_W	10087661	10095594	3.41466	1	1	1581	138	138	128	128
Smp_132950	-23.1218	0.000109147	hypothetical protein	3.35631	1	1	372	35	35	35	35	1	0	0	0	0	1	3.35631	9	Schisto_mansoni.SC_0136	115096	115467	3.17402	1	1	372	29	29	29	29	1	0	0	0	0	1	3.17402	7	Schisto_mansoni.SC_0136	115096	115467	3.85483	1	1	372	34	34	34	34
Smp_176000	-22.7242	8.73776e-05	myosin V, putative	0.843375	2	2	5541	150	150	131	131	1	43	43	9	9	25	0.843375	2	Schisto_mansoni.Chr_1.unplaced.SC_0153	463526	507834	0.690708	2	2	5541	122	123	94	94	1	31	31	3	3	25	0.690708	1	Schisto_mansoni.Chr_1.unplaced.SC_0153	463526	507834	0.753558	2	2	5541	118	118	99	99
Smp_153520	-21.4877	4.08294e-05	hypothetical protein	2.07001	1	1	2809	174	174	163	163	1	48	48	0	0	11	2.07001	6	Schisto_mansoni.Chr_W	31184266	31196425	1.75383	1	1	2809	125	125	121	121	1	36	36	1	1	11	1.75383	4	Schisto_mansoni.Chr_W	31184266	31196425	1.95192	1	1	2809	138	138	130	130
Smp_009600	-19.957	1.96524e-06	serine/threonine kinase	3.75233	1	1	2082	334	730	219	219	1	52	52	3	3	6	3.75233	10	Schisto_mansoni.Chr_1	32309427	32321362	3.7547	1	1	2082	315	769	192	192	1	45	45	1	1	6	3.7547	9	Schisto_mansoni.Chr_1	32309427	32321362	4.01101	1	1	2082	317	790	198	198
Smp_065150	-19.3764	2.70131e-06	establishment of cohesion 1 (eco1) homolog, putative	5.96484	1	1	921	159	159	154	154	1	22	22	0	0	2	5.96484	17	Schisto_mansoni.Chr_2	21236254	21239610	6.23325	1	1	921	147	147	141	141	1	20	20	0	0	2	6.23325	16	Schisto_mansoni.Chr_2	21236254	21239610	6.18221	1	1	921	138	138	135	135
Smp_041540	-18.7229	0.000132924	Hormone receptor 4 (dHR4), putative	1.46871	1	1	1263	53	53	52	52	1	6	6	0	0	2	1.46871	4	Schisto_mansoni.Chr_7.unplaced.SC_0100	1168070	1171933	1.38618	1	1	1263	44	44	43	43	1	3	3	0	0	2	1.38618	3	Schisto_mansoni.Chr_7.unplaced.SC_0100	1168070	1171933	1.70309	1	1	1263	52	52	51	51
Smp_129710	-17.5589	1.53784e-06	Uveal autoantigen with coiled-coil domains and ankyrin repeats protein, putative	2.16585	1	1	4480	302	304	272	272	1	88	88	7	7	19	2.16585	6	Schisto_mansoni.Chr_2.unplaced.SC_0120	669479	699798	2.05393	1	1	4480	247	248	226	226	1	57	57	3	3	19	2.05393	5	Schisto_mansoni.Chr_2.unplaced.SC_0120	669479	699798	2.05233	1	1	4480	244	246	218	218
Smp_125760	-16.8863	1.66213e-05	prokaryotic DNA topoisomerase, putative	0.557859	1	1	2366	67	67	37	37	1	14	14	7	7	16	0.557859	1	Schisto_mansoni.Chr_1	24537880	24561773	0.516252	1	1	2366	64	64	30	30	1	13	13	2	2	16	0.516252	1	Schisto_mansoni.Chr_1	24537880	24561773	0.570433	1	1	2366	52	53	32	32
Smp_181530	-16.8029	9.47982e-05	tetraspanin, putative	185.733	1	1	213	1109	1109	1109	1109	1	0	0	0	0	1	185.733	519	Schisto_mansoni.Chr_4	23030843	23031055	185.989	1	1	213	973	973	973	973	1	0	0	0	0	1	185.989	444	Schisto_mansoni.Chr_4	23030843	23031055	221.179	1	1	213	1117	1117	1117	1117
Smp_170480	-16.6657	0.000308464	family M13 unassigned peptidase (M13 family)	0.864796	1	1	825	53	53	20	20	1	13	13	4	4	8	0.864796	2	Schisto_mansoni.Chr_2	22301106	22308949	1.03638	1	1	825	57	58	20	21	0.952381	5	6	10	10	8	1.03638	2	Schisto_mansoni.Chr_2	22301106	22308949	0.920213	1	1	825	45	47	18	18
Smp_187070	-16.1197	3.12525e-05	hypothetical protein	5.89902	1	1	768	56	127	56	127	0.440945	0	0	0	0	1	5.89902	17	Schisto_mansoni.SC_0236	138168	138935	6.20268	1	1	768	57	117	57	117	0.487179	0	0	0	0	1	6.20268	15	Schisto_mansoni.SC_0236	138168	138935	5.32697	1	1	768	39	97	39	97
Smp_137390	-15.2906	1.85412e-06	slbp-P1-related	3.28639	1	1	1270	151	151	117	117	1	40	40	9	9	6	3.28639	9	Schisto_mansoni.Chr_1	33306540	33315232	3.3662	1	1	1270	131	131	105	105	1	40	40	8	8	6	3.3662	8	Schisto_mansoni.Chr_1	33306540	33315232	3.25456	1	1	1270	130	130	98	98
Smp_141160	-15.0457	3.1049e-05	hypothetical protein	3.4548	1	1	888	86	86	86	86	1	15	15	10	10	3	3.4548	10	Schisto_mansoni.Chr_1	14847250	14848387	3.98897	1	1	888	88	88	87	87	1	19	19	8	8	3	3.98897	11	Schisto_mansoni.Chr_1	14847250	14848387	3.5622	1	1	888	75	75	75	75
Smp_169970	-15.0065	6.89521e-05	paramyosin, putative	2.73998	1	1	2018	196	197	155	155	1	86	86	6	6	13	2.73998	8	Schisto_mansoni.Chr_6	5183840	5199957	3.1878	1	1	2018	187	187	158	158	1	98	98	3	3	13	3.1878	8	Schisto_mansoni.Chr_6	5183840	5199957	2.75881	1	1	2018	163	163	132	132
Smp_126430	-14.8512	0.0487457		0.182938	1	0	585	93	111	3	3	1	0	0	3	3	3	0.182938	0	Schisto_mansoni.Chr_1	63480367	63490056	0.487189	1	1	585	80	93	7	7	1	0	0	1	1	3	0.487189	1	Schisto_mansoni.Chr_1	63480367	63490056	0.216289	1	1	585	95	104	3	3
Smp_140540	-14.2094	3.47007e-07	hypothetical protein	1.50428	1	1	498	21	21	21	21	1	0	0	0	0	1	1.50428	4	Schisto_mansoni.Chr_1	23670524	23671021	1.55339	1	1	498	19	19	19	19	1	0	0	0	0	1	1.55339	3	Schisto_mansoni.Chr_1	23670524	23671021	1.52445	1	1	498	18	18	18	18
Smp_164170	-13.826	4.33004e-06	hypothetical protein	7.75645	1	1	1044	560	1463	180	227	0.792952	0	0	6	6	3	7.75645	24.5	Schisto_mansoni.Chr_6	19821650	19850669	7.17583	1	1	1044	483	1301	154	184	0.836957	0	0	1	1	3	7.17583	22	Schisto_mansoni.Chr_6	19821650	19850669	7.51419	1	1	1044	474	1227	142	186
Smp_026400	-13.6676	0.00119983	thyrotroph embryonic factor related	0.556229	1	1	962	15	15	15	15	1	0	0	3	3	2	0.556229	1	Schisto_mansoni.Chr_W	55300367	55301333	0.76182	1	1	962	18	18	18	18	1	0	0	3	3	2	0.76182	1	Schisto_mansoni.Chr_W	55300367	55301333	0.569952	1	1	962	13	13	13	13
Smp_187410	-12.45	2.91714e-06		14.5144	1	1	698	219	379	162	284	0.570423	124	125	5	87	4	14.5144	29	Schisto_mansoni.SC_0212	335709	340869	15.3994	1	1	698	205	322	168	264	0.636364	122	123	4	64	4	15.3994	35	Schisto_mansoni.SC_0212	335709	340869	15.5896	1	1	698	187	315	151	258
Smp_155390	-12.1244	0.000216502		1.59462	1	1	1991	214	216	89	89	1	17	17	16	16	9	1.59462	5	Schisto_mansoni.Chr_W	30346500	30367717	1.94271	1	1	1991	218	219	95	95	1	24	24	13	13	9	1.94271	4	Schisto_mansoni.Chr_W	30346500	30367717	1.56758	1	1	1991	175	178	74	74
Smp_160930	-11.9103	9.47578e-05	hypothetical protein	0.858552	1	1	831	55	55	20	20	1	3	3	16	16	6	0.858552	1	Schisto_mansoni.Chr_1	23248648	23252371	0.93091	1	1	831	55	55	19	19	1	1	1	15	15	6	0.93091	1	Schisto_mansoni.Chr_1	23248648	23252371	0.812061	1	1	831	43	43	16	16
Smp_151440	-11.9065	1.80627e-05		7.75811	1	1	492	109	109	107	107	1	24	24	0	0	2	7.75811	22	Schisto_mansoni.Chr_4	24895016	24896682	8.52368	1	1	492	103	103	103	103	1	19	19	0	0	2	8.52368	23	Schisto_mansoni.Chr_4	24895016	24896682	8.57244	1	1	492	101	101	100	100
Smp_145470	-11.841	0.000362422	zinc finger protein, putative	2.1309	1	1	1356	101	101	81	81	1	0	0	11	11	3	2.1309	5	Schisto_mansoni.Chr_4	13034053	13037545	2.07178	1	1	1356	89	89	69	69	1	0	0	10	10	3	2.07178	4	Schisto_mansoni.Chr_4	13034053	13037545	1.64849	1	1	1356	74	74	53	53
Smp_193630	-11.5986	0.017922	endoglycoceramidase, putative	1.98953	1	1	771	32	43	32	43	0.744186	0	0	0	0	1	1.98953	6	Schisto_mansoni.SC_0271	99951	100721	1.05616	1	1	771	15	20	15	20	0.75	0	0	0	0	1	1.05616	2	Schisto_mansoni.SC_0271	99951	100721	1.03937	1	1	771	16	19	16	19
Smp_194820	-11.5396	2.26207e-05	DNA repair and recombination protein rad54-related	1.02779	1	1	2499	124	127	72	72	1	36	36	1	1	18	1.02779	2	Schisto_mansoni.Chr_W	41397015	41429233	0.928675	1	1	2499	89	92	57	57	1	34	34	1	1	18	0.928675	2	Schisto_mansoni.Chr_W	41397015	41429233	1.04639	1	1	2499	106	107	62	62
Smp_154090	-11.3075	0.000681998		2.55692	1	1	1437	118	118	103	103	1	38	38	2	2	7	2.55692	7	Schisto_mansoni.Chr_6	10636391	10642686	1.89834	1	1	1437	75	75	67	67	1	28	28	2	2	7	1.89834	4	Schisto_mansoni.Chr_6	10636391	10642686	2.58283	1	1	1437	100	100	88	88
Smp_119060	-11.2411	0.173578		0.236871	1	1	753	5	5	5	5	1	0	0	0	0	2	0.236871	1	Schisto_mansoni.Chr_6	1585987	1587726	0	1	0	753	0	0	0	0	#NUM!	0	0	0	0	2	0	0	Schisto_mansoni.Chr_6	1585987	1587726	0.392078	1	1	753	7	7	7	7
Smp_172530	-10.9419	7.10416e-07	DNA replication licensing factor MCM4, putative	4.53386	1	1	2565	337	337	326	326	1	127	127	30	30	13	4.53386	11	Schisto_mansoni.Chr_6	9925585	9945912	4.49215	1	1	2565	297	299	283	283	1	122	122	34	34	13	4.49215	10	Schisto_mansoni.Chr_6	9925585	9945912	4.29164	1	1	2565	269	270	261	261
Smp_119910	-10.2129	3.63766e-05	hypothetical protein	3.30024	1	1	1416	136	137	131	131	1	43	43	0	0	7	3.30024	9	Schisto_mansoni.SC_0455	3441	9344	2.8466	1	1	1416	110	110	99	99	1	34	34	0	0	7	2.8466	7	Schisto_mansoni.SC_0455	3441	9344	3.12749	1	1	1416	114	114	105	105
Smp_187010	-9.81366	0.000112249		3.53653	1	1	696	142	169	61	69	0.884058	13	14	7	7	3	3.53653	8	Schisto_mansoni.Chr_4	17498547	17511684	3.33442	1	1	696	127	142	54	57	0.947368	11	11	4	4	3	3.33442	7	Schisto_mansoni.Chr_4	17498547	17511684	4.06009	1	1	696	126	147	61	67
Smp_113710	-9.51453	0.0179427	hypothetical protein	0.610371	1	1	526	16	16	9	9	1	2	2	0	0	3	0.610371	2	Schisto_mansoni.Chr_5	7375453	7376734	0.30962	1	1	526	7	7	4	4	1	0	0	0	0	3	0.30962	0	Schisto_mansoni.Chr_5	7375453	7376734	0.72165	1	1	526	12	12	9	9
Smp_169410	-9.32185	0.000104052	hypothetical protein	0.671724	1	1	2496	71	71	47	47	1	20	20	5	5	13	0.671724	1	Schisto_mansoni.SC_0041	1086508	1112449	0.717733	1	1	2496	57	58	44	44	1	17	17	4	4	13	0.717733	1	Schisto_mansoni.SC_0041	1086508	1112449	0.591416	1	1	2496	60	61	35	35
Smp_143490	-9.06315	0.000409556	DNA replication licensing factor MCM5, putative	8.24924	1	1	2253	543	544	521	521	1	267	267	6	6	12	8.24924	23	Schisto_mansoni.Chr_2	29106774	29116569	6.21659	1	1	2253	372	372	344	344	1	165	165	5	5	12	6.21659	15	Schisto_mansoni.Chr_2	29106774	29116569	7.1698	1	1	2253	405	405	383	383
Smp_144160	-8.9884	0.000379281	hypothetical protein	0.560615	1	1	4836	118	128	76	76	1	25	25	0	0	25	0.560615	1	Schisto_mansoni.Chr_1	60733855	60783359	0.446215	1	1	4836	92	101	53	53	1	15	15	1	1	25	0.446215	1	Schisto_mansoni.Chr_1	60733855	60783359	0.462231	1	1	4836	83	89	53	53
Smp_128200	-8.98219	0.000111012	rabkinesin-6 - related	2.36638	2	2	2819	213	213	187	187	1	93	93	1	1	18	2.36638	6	Schisto_mansoni.Chr_2	26974919	26989357	2.38311	2	2	2819	183	184	165	165	1	69	69	4	4	18	2.38311	5	Schisto_mansoni.Chr_2	26974919	26989357	2.81276	2	2	2819	201	201	188	188
Smp_026030	-8.69272	0.000807116	DNA repair and recombination protein rad54-related	0.780486	1	1	2331	197	210	51	51	1	20	20	6	6	13	0.780486	2	Schisto_mansoni.Chr_4.unplaced.SC_0032	521539	542125	1.03054	1	1	2331	196	204	59	59	1	14	14	7	7	13	1.03054	2	Schisto_mansoni.Chr_4.unplaced.SC_0032	521539	542125	0.814217	1	1	2331	167	179	45	45
Smp_071890	-8.66122	4.66015e-05	hypothetical protein	0.704069	1	1	1976	1142	1898	39	39	1	15	15	0	0	6	0.704069	2	Schisto_mansoni.Chr_2	23148117	23164967	0.638748	1	1	1976	950	1676	31	31	1	17	17	1	1	6	0.638748	1	Schisto_mansoni.Chr_2	23148117	23164967	0.618986	1	1	1976	960	1706	29	29
Smp_054610	-8.44065	0.000285269		1.18405	1	1	4007	170	170	133	133	1	46	46	5	5	16	1.18405	3	Schisto_mansoni.SC_0214	134952	157367	1.38189	1	1	4007	159	159	136	136	1	47	47	7	7	16	1.38189	3	Schisto_mansoni.SC_0214	134952	157367	1.52622	1	1	4007	168	168	145	145
Smp_172610	-8.29845	0.00127173	hypothetical protein	1.37385	1	1	1506	77	78	58	58	1	9	9	4	4	6	1.37385	3	Schisto_mansoni.Chr_4	1695441	1715133	1.56804	1	1	1506	79	80	58	58	1	7	7	6	6	6	1.56804	3	Schisto_mansoni.Chr_4	1695441	1715133	1.09222	1	1	1506	56	57	39	39
Smp_162340	-7.8966	5.61891e-05	phosphatidylinositol 3- and 4-kinase, putative	0.575574	1	1	8367	3971	5762	135	135	1	73	73	3	3	50	0.575574	1	Schisto_mansoni.Chr_W	45490939	45559573	0.559607	1	1	8367	3675	5296	115	115	1	55	55	8	8	50	0.559607	1	Schisto_mansoni.Chr_W	45490939	45559573	0.493999	1	1	8367	3445	4950	98	98
Smp_131830	-7.7502	0.0840194		0.0309391	1	1	1153	1	1	1	1	1	0	0	0	0	1	0.0309391	0	Schisto_mansoni.Chr_3.unplaced.SC_0105	299097	300249	0.105937	1	1	1153	3	3	3	3	1	0	0	0	0	1	0.105937	0	Schisto_mansoni.Chr_3.unplaced.SC_0105	299097	300249	0.146319	1	1	1153	4	4	4	4
Smp_176010	-7.70013	4.45873e-05	hypothetical protein	0.710389	1	1	4419	109	111	88	88	1	29	29	4	4	20	0.710389	2	Schisto_mansoni.Chr_1.unplaced.SC_0153	369845	398156	0.644954	1	1	4419	94	95	70	70	1	27	27	3	3	20	0.644954	1	Schisto_mansoni.Chr_1.unplaced.SC_0153	369845	398156	0.687192	1	1	4419	90	90	72	72
Smp_056350	-7.66435	0.00130361	mitotic spindle assembly checkpoint protein mad2- related	5.20598	1	1	603	89	89	88	88	1	67	67	3	3	5	5.20598	16	Schisto_mansoni.Chr_W	23080849	23082829	3.91621	1	1	603	62	62	58	58	1	46	46	0	0	5	3.91621	9	Schisto_mansoni.Chr_W	23080849	23082829	5.45566	1	1	603	78	78	78	78
Smp_144860	-7.44872	0.0322536	boule-related	0.0466311	1	1	1530	2	2	2	2	1	1	1	0	0	7	0.0466311	0	Schisto_mansoni.Chr_7	6618065	6621121	0.0798334	1	1	1530	3	3	3	3	1	0	0	0	0	7	0.0798334	0	Schisto_mansoni.Chr_7	6618065	6621121	0.110265	1	1	1530	4	4	4	4
Smp_154940	-7.42481	0.0114142		1.9041	1	1	918	59	60	49	49	1	15	15	0	0	4	1.9041	5	Schisto_mansoni.Chr_W	22262077	22271163	1.99584	1	1	918	51	51	45	45	1	13	13	0	0	4	1.99584	4	Schisto_mansoni.Chr_W	22262077	22271163	1.01076	1	1	918	28	28	22	22
Smp_133990	-6.98427	0.000489575	topbp1, putative	0.575368	2	1	4340	98	99	70	70	1	11	11	0	0	9	0.575368	1	Schisto_mansoni.Chr_2	3324287	3342732	0.48783	2	1	4340	72	72	52	52	1	11	11	0	0	9	0.48783	1	Schisto_mansoni.Chr_2	3324287	3342732	0.456749	2	1	4340	61	62	47	47
Smp_046280	-6.79557	3.42309e-06	hypothetical protein	3.16184	2	2	2358	222	222	209	209	1	80	80	2	2	15	3.16184	8	Schisto_mansoni.Chr_6	14885622	14904776	3.21162	2	2	2358	198	198	186	186	1	85	85	0	0	15	3.21162	7	Schisto_mansoni.Chr_6	14885622	14904776	3.04071	2	2	2358	178	179	170	170
Smp_135900	-6.75463	2.12855e-05	DNA double-strand break repair rad50 ATPase, putative	1.7565	1	1	3351	250	253	165	165	1	39	39	14	14	15	1.7565	4	Schisto_mansoni.Chr_W	36079592	36109822	1.62812	1	1	3351	195	198	134	134	1	42	42	11	11	15	1.62812	3	Schisto_mansoni.Chr_W	36079592	36109822	1.57328	1	1	3351	175	179	125	125
Smp_047620	-6.74242	0.00161056	cyclin B3, putative	1.9403	1	1	2482	146	146	135	135	1	35	35	11	11	11	1.9403	6	Schisto_mansoni.Chr_2	8502927	8516298	1.34514	1	1	2482	97	97	82	82	1	27	27	3	3	11	1.34514	3	Schisto_mansoni.Chr_2	8502927	8516298	1.52936	1	1	2482	109	109	90	90
Smp_199870	-6.61376	8.95032e-05		2.44077	1	1	570	57	57	39	39	1	10	10	5	5	4	2.44077	7	Schisto_mansoni.SC_0584	2700	6251	2.1429	1	1	570	42	42	30	30	1	5	5	1	1	4	2.1429	5	Schisto_mansoni.SC_0584	2700	6251	2.29381	1	1	570	39	39	31	31
Smp_138470	-6.51645	5.96358e-06		21.0128	1	1	1022	602	602	602	602	1	0	0	0	0	1	21.0128	64	Schisto_mansoni.Chr_3	19818002	19819023	22.8674	1	1	1022	574	574	574	574	1	0	0	0	0	1	22.8674	61	Schisto_mansoni.Chr_3	19818002	19819023	22.6977	1	1	1022	550	550	550	550
Smp_143460	-6.39781	0.000115725	hypothetical protein	2.31773	1	1	1416	128	128	92	92	1	33	33	1	1	6	2.31773	7	Schisto_mansoni.Chr_2	29231367	29249030	2.73159	1	1	1416	128	128	95	95	1	38	38	0	0	6	2.73159	6	Schisto_mansoni.Chr_2	29231367	29249030	2.53178	1	1	1416	117	117	85	85
Smp_149490	-6.36311	0.000444896	hypothetical protein	0.946081	1	1	1923	53	53	51	51	1	4	4	1	1	2	0.946081	2	Schisto_mansoni.Chr_6	14875171	14878980	0.889252	1	1	1923	44	44	42	42	1	5	5	0	0	2	0.889252	2	Schisto_mansoni.Chr_6	14875171	14878980	1.11856	1	1	1923	53	53	51	51
Smp_179320	-6.06109	1.97022e-07	eukaryotic translation initiation factor 2c, putative	10.2267	1	1	2808	797	818	784	805	0.973913	416	427	10	10	18	10.2267	28	Schisto_mansoni.SC_0250	11056	17725	10.1208	1	1	2808	689	703	684	698	0.979943	362	371	15	15	18	10.1208	23	Schisto_mansoni.SC_0250	11056	17725	10.469	1	1	2808	687	702	682	697
Smp_146460	-6.04963	2.98631e-06	22.6kDa tegument-associated antigen, putative	3.44382	1	1	549	97	102	53	53	1	28	28	16	16	4	3.44382	8	Schisto_mansoni.Chr_W	13842992	13857069	3.55979	1	1	549	75	79	48	48	1	26	26	11	11	4	3.55979	11	Schisto_mansoni.Chr_W	13842992	13857069	3.38026	1	1	549	72	78	44	44
Smp_002930	-5.98719	0.00717443	histone H2A, putative	2.5885	1	1	441	32	32	32	32	1	0	0	0	0	1	2.5885	8	Schisto_mansoni.Chr_3	18141352	18141792	1.93881	1	1	441	21	21	21	21	1	0	0	0	0	1	1.93881	5	Schisto_mansoni.Chr_3	18141352	18141792	3.34733	1	1	441	35	35	35	35
Smp_081920	-5.84775	1.49343e-05	hypothetical protein	212.968	1	1	534	3725	3740	3188	3188	1	1771	1771	44	44	3	212.968	605	Schisto_mansoni.Chr_1	59105712	59109795	209.065	1	1	534	3088	3102	2742	2742	1	1568	1568	43	43	3	209.065	505.5	Schisto_mansoni.Chr_1	59105712	59109795	232.207	1	1	534	3376	3389	2940	2940
Smp_130970	-5.81147	0.152002	cyclins, putative	0.0233614	1	1	1527	1	1	1	1	1	1	1	0	0	7	0.0233614	0	Schisto_mansoni.Chr_1	2095269	2107739	0.0266634	1	1	1527	1	1	1	1	1	1	1	0	0	7	0.0266634	0	Schisto_mansoni.Chr_1	2095269	2107739	0.0828613	1	1	1527	3	3	3	3
Smp_166510	-5.74869	0.0693754	hypothetical protein	0.371592	1	0	192	80	80	2	2	1	0	0	2	2	2	0.371592	0	Schisto_mansoni.SC_0111	615919	624027	1.06029	1	0	192	94	94	5	5	1	0	0	5	5	2	1.06029	0	Schisto_mansoni.SC_0111	615919	624027	0.659007	1	0	192	68	69	3	3
Smp_167760	-5.74804	0.0808334	30S ribosomal protein S12 family member, putative	0.0887384	1	1	402	1	1	1	1	1	0	0	0	0	2	0.0887384	0	Schisto_mansoni.Chr_W	46735710	46736179	0.303844	1	1	402	3	3	3	3	1	0	0	0	0	2	0.303844	0	Schisto_mansoni.Chr_W	46735710	46736179	0.209833	1	1	402	0	2	0	2
Smp_157180	-5.74161	0.0274119	hypothetical protein	1.47104	1	1	291	12	12	12	12	1	0	0	0	0	1	1.47104	4	Schisto_mansoni.Chr_W	37838505	37838795	0.839485	1	1	291	6	6	6	6	1	0	0	0	0	1	0.839485	2	Schisto_mansoni.Chr_W	37838505	37838795	1.01455	1	1	291	7	7	7	7
Smp_173450	-5.7305	0.00202706	kif4a, putative	0.815784	1	1	4023	126	126	92	92	1	25	25	1	1	15	0.815784	2	Schisto_mansoni.Chr_3.unplaced.SC_0083	85872	114624	0.627475	1	1	4023	102	103	62	62	1	20	20	1	1	15	0.627475	1	Schisto_mansoni.Chr_3.unplaced.SC_0083	85872	114624	0.84919	1	1	4023	120	120	81	81
Smp_170830	-5.66706	0.230403	alpha-galactosidase/alpha-n-acetylgalactosamini da se,putative	0.0932623	1	1	765	2	2	2	2	1	0	0	0	0	2	0.0932623	0	Schisto_mansoni.Chr_6	1315832	1316826	0	1	0	765	0	0	0	0	#NUM!	0	0	0	0	2	0	0	Schisto_mansoni.Chr_6	1315832	1316826	0.165398	1	1	765	3	3	3	3
Smp_154120	-5.54337	0.201273	hypothetical protein	0.206201	1	1	519	3	3	3	3	1	0	0	0	0	2	0.206201	0	Schisto_mansoni.Chr_6	10529227	10529789	0	1	0	519	0	0	0	0	#NUM!	0	0	0	0	2	0	0	Schisto_mansoni.Chr_6	10529227	10529789	0.243794	1	1	519	3	3	3	3
Smp_077860	-5.52902	0.000532438	actin, putative	3.5534	1	1	1285	128	128	128	128	1	0	0	0	0	1	3.5534	10	Schisto_mansoni.Chr_6	19805190	19806474	2.88332	1	1	1285	91	91	91	91	1	0	0	0	0	1	2.88332	7	Schisto_mansoni.Chr_6	19805190	19806474	2.75706	1	1	1285	84	84	84	84
Smp_138420	-5.39709	0.209964	zinc finger protein, putative	0.41968	1	1	255	3	3	3	3	1	1	1	2	2	3	0.41968	1	Schisto_mansoni.Chr_3.unplaced.SC_0192	40256	43509	0.319334	1	1	255	2	2	2	2	1	1	1	1	1	3	0.319334	1	Schisto_mansoni.Chr_3.unplaced.SC_0192	40256	43509	0	1	0	255	1	1	0	0
Smp_204580	-5.35432	0.169687		0.116009	1	1	1230	4	4	4	4	1	0	0	0	0	1	0.116009	0	Schisto_mansoni.SC_0125	871321	872550	0.0331017	1	1	1230	1	1	1	1	1	0	0	0	0	1	0.0331017	0	Schisto_mansoni.SC_0125	871321	872550	0.0342898	1	1	1230	1	1	1	1
Smp_047610	-5.24997	2.19379e-05	cell division control protein 45-related	1.63579	1	1	1701	119	119	78	78	1	53	53	9	9	15	1.63579	4	Schisto_mansoni.Chr_2	8530011	8541268	1.72339	1	1	1701	107	107	72	72	1	51	51	4	4	15	1.72339	4	Schisto_mansoni.Chr_2	8530011	8541268	1.63647	1	1	1701	99	99	66	66
Smp_151360	-5.20056	0.00152389		0.813387	1	1	921	24	24	21	21	1	0	0	4	4	3	0.813387	1	Schisto_mansoni.SC_0214	112937	115391	1.10519	1	1	921	29	29	25	25	1	4	4	2	2	3	1.10519	1	Schisto_mansoni.SC_0214	112937	115391	0.915883	1	1	921	21	21	20	20
Smp_135890	-5.20029	0.000263581	hypothetical protein	0.739268	1	1	2847	65	65	59	59	1	3	3	0	0	3	0.739268	2	Schisto_mansoni.Chr_W	36122397	36132376	0.715052	1	1	2847	51	51	50	50	1	3	3	0	0	3	0.715052	1	Schisto_mansoni.Chr_W	36122397	36132376	0.622202	1	1	2847	46	46	42	42
Smp_072560	-5.19219	0.000157082	hypothetical protein	2.87904	1	1	2094	226	232	169	169	1	60	60	2	2	9	2.87904	7	Schisto_mansoni.Chr_1	55530523	55553134	2.74156	1	1	2094	195	200	141	141	1	55	55	2	2	9	2.74156	6	Schisto_mansoni.Chr_1	55530523	55553134	3.22265	1	1	2094	216	221	160	160
Smp_051920	-5.1076	3.54791e-06	hypothetical protein	19.1559	2	2	1149	617	617	617	617	1	316	316	34	34	8	19.1559	55	Schisto_mansoni.Chr_4	3420411	3421965	18.32	2	1	1149	517	517	517	517	1	260	260	32	32	8	18.32	49	Schisto_mansoni.Chr_4	3420411	3421965	18.0232	2	2	1149	491	491	491	491
Smp_128870	-5.09394	2.03721e-05	nibrin-related	1.23542	1	1	1848	119	123	64	64	1	23	23	8	8	12	1.23542	3	Schisto_mansoni.Chr_1	21475854	21495086	1.18973	1	1	1848	111	122	54	54	1	24	24	7	7	12	1.18973	2	Schisto_mansoni.Chr_1	21475854	21495086	1.20961	1	1	1848	91	93	53	53
Smp_141430	-5.02935	0.00204455		0.428502	1	1	999	16	16	12	12	1	3	3	1	1	4	0.428502	1	Schisto_mansoni.Chr_6	11760701	11771589	0.570581	1	1	999	19	19	14	14	1	3	3	2	2	4	0.570581	1	Schisto_mansoni.Chr_6	11760701	11771589	0.548842	1	1	999	16	17	13	13
Smp_172010	-4.98791	0.118701	caspase-7 (C14 family)	0.327274	1	0	218	2	2	2	2	1	0	0	2	2	2	0.327274	1	Schisto_mansoni.SC_0622	10618	10878	1.1206	1	1	218	6	6	6	6	1	0	0	5	5	2	1.1206	3	Schisto_mansoni.SC_0622	10618	10878	1.74123	1	1	218	9	9	9	9
Smp_203380	-4.91397	0.000249131		49.223	1	1	387	478	534	478	534	0.895131	0	0	0	0	1	49.223	135	Schisto_mansoni.Chr_W	7108443	7108829	43.4504	1	1	387	364	413	364	413	0.881356	0	0	0	0	1	43.4504	108	Schisto_mansoni.Chr_W	7108443	7108829	53.4017	1	1	387	444	490	444	490
Smp_174820	-4.87695	0.000336291	serine/threonine kinase	0.990912	1	1	1044	85	85	29	29	1	11	11	2	2	7	0.990912	3	Schisto_mansoni.SC_0184	259056	271484	0.935978	1	1	1044	62	62	24	24	1	13	13	4	4	7	0.935978	2	Schisto_mansoni.SC_0184	259056	271484	1.17157	1	1	1044	59	59	29	29
Smp_205520	-4.86432	0.0118778		1.67693	1	1	234	11	11	11	11	1	0	0	0	0	1	1.67693	3	Schisto_mansoni.SC_0402	7855	8088	2.26195	1	1	234	12	13	12	13	0.923077	0	0	0	0	1	2.26195	4	Schisto_mansoni.SC_0402	7855	8088	1.44193	1	1	234	8	8	8	8
Smp_120050	-4.67505	0.000107058	endoglycoceramidase, putative	5.13472	1	1	924	85	133	85	133	0.639098	0	0	0	0	1	5.13472	10	Schisto_mansoni.Chr_2.unplaced.SC_0108	1163972	1164895	4.40639	1	1	924	63	100	63	100	0.63	0	0	0	0	1	4.40639	6	Schisto_mansoni.Chr_2.unplaced.SC_0108	1163972	1164895	5.15794	1	1	924	74	113	74	113
Smp_147880	-4.60355	0.0960458		0.0526148	1	1	678	1	1	1	1	1	0	0	0	0	2	0.0526148	0	Schisto_mansoni.Chr_1	48430598	48431341	0.0600517	1	1	678	1	1	1	1	1	0	0	0	0	2	0.0600517	0	Schisto_mansoni.Chr_1	48430598	48431341	0.124414	1	1	678	2	2	2	2
Smp_028050	-4.56521	2.13229e-05		1.4177	1	1	4026	207	208	160	160	1	58	58	2	2	16	1.4177	4	Schisto_mansoni.Chr_1	33377070	33413052	1.52707	1	1	4026	209	215	151	151	1	48	48	1	1	16	1.52707	3	Schisto_mansoni.Chr_1	33377070	33413052	1.51902	1	1	4026	198	204	145	145
Smp_192470	-4.5617	0.0877376		0.15646	1	1	228	0	1	0	1	0	0	0	0	0	1	0.15646	0	Schisto_mansoni.SC_0163	544551	544778	0.35715	1	1	228	0	2	0	2	0	0	0	0	0	1	0.35715	1	Schisto_mansoni.SC_0163	544551	544778	0.184984	1	1	228	0	1	0	1
Smp_188100	-4.51984	0.342623	pyruvate carboxylase, putative	0.237819	1	1	150	0	1	0	1	0	0	0	0	0	1	0.237819	1	Schisto_mansoni.Chr_1	13549115	13549264	0.814301	1	1	150	0	3	0	3	0	0	0	0	0	1	0.814301	3	Schisto_mansoni.Chr_1	13549115	13549264	0	1	0	150	0	0	0	0
Smp_203200	-4.41729	0.0603861		0.144133	1	1	495	2	2	2	2	1	0	0	0	0	1	0.144133	0	Schisto_mansoni.Chr_6	17330431	17330925	0.0822526	1	1	495	1	1	1	1	1	0	0	0	0	1	0.0822526	0	Schisto_mansoni.Chr_6	17330431	17330925	0.0852049	1	1	495	1	1	1	1
Smp_181910	-4.22159	0.0564643	hypothetical protein	1.15243	1	1	681	10	22	10	22	0.454545	0	0	0	0	1	1.15243	2	Schisto_mansoni.SC_0329	53994	54674	0.41851	1	1	681	3	7	3	7	0.428571	0	0	0	0	1	0.41851	1	Schisto_mansoni.SC_0329	53994	54674	0.681264	1	1	681	5	11	5	11
Smp_076600	-4.16657	0.00358497	sox transcription factor	0.912387	1	1	2385	73	73	61	61	1	5	5	0	0	2	0.912387	2	Schisto_mansoni.SC_0149	19031	26816	0.648709	1	1	2385	49	49	38	38	1	1	1	0	0	2	0.648709	1	Schisto_mansoni.SC_0149	19031	26816	0.990306	1	1	2385	63	63	56	56
Smp_205470	-4.09272	0.188274		0.0720663	1	1	495	0	1	0	1	0	0	0	0	0	1	0.0720663	0	Schisto_mansoni.SC_0387	25820	26314	0.164505	1	1	495	0	2	0	2	0	0	0	0	0	1	0.164505	0	Schisto_mansoni.SC_0387	25820	26314	0.34082	1	1	495	0	4	0	4
Smp_136890	-4.05236	0.435712		2.05633	1	1	399	29	29	23	23	1	0	0	6	6	2	2.05633	5	Schisto_mansoni.Chr_4	26739175	26741618	0.102043	1	1	399	2	2	1	1	1	0	0	0	0	2	0.102043	0	Schisto_mansoni.Chr_4	26739175	26741618	0.105705	1	1	399	2	2	1	1
Smp_142820	-4.04706	0.000884141		2.46144	1	1	1971	148	148	136	136	1	22	22	1	1	5	2.46144	7	Schisto_mansoni.Chr_W	53003094	53015632	2.04505	1	1	1971	110	111	99	99	1	16	16	1	1	5	2.04505	5	Schisto_mansoni.Chr_W	53003094	53015632	1.86167	1	1	1971	91	91	87	87
Smp_179110	-4.03337	0.00632297	purine nucleoside phosphorylase, putative	0.745046	1	1	1197	30	30	25	25	1	6	6	1	1	5	0.745046	2	Schisto_mansoni.Chr_W	5472986	5475693	0.986413	1	1	1197	32	32	29	29	1	14	14	0	0	5	0.986413	2	Schisto_mansoni.Chr_W	5472986	5475693	1.09229	1	1	1197	33	33	31	31
Smp_137250	-3.96963	0.354362	hypothetical protein	0	1	0	363	103	151	0	0	#NUM!	0	0	0	0	2	0	0	Schisto_mansoni.SC_0384	8320	28059	0.112163	1	0	363	104	131	1	1	1	0	0	1	1	2	0.112163	0	Schisto_mansoni.SC_0384	8320	28059	0.348565	1	1	363	103	150	3	3
Smp_165340	-3.96531	0.0017792	retinaldehyde binding protein-related	2.34927	1	1	987	148	149	65	65	1	27	27	2	2	7	2.34927	7	Schisto_mansoni.Chr_4	20761792	20783441	2.88759	1	1	987	146	148	70	70	1	29	29	0	0	7	2.88759	6	Schisto_mansoni.Chr_4	20761792	20783441	2.60665	1	1	987	106	106	61	61
Smp_040020	-3.95633	0.00254686	centromere protein A (cenp-A) (centromere autoantigen A), putative	3.24606	1	1	1055	110	110	96	96	1	27	27	0	0	4	3.24606	9	Schisto_mansoni.Chr_5	7528102	7537988	2.23836	1	1	1055	65	66	58	58	1	13	13	1	1	4	2.23836	6	Schisto_mansoni.Chr_5	7528102	7537988	2.79844	1	1	1055	81	81	70	70
Smp_178260	-3.94615	0.00183704	DNA polymerase alpha catalytic subunit, putative	1.43125	1	1	4935	256	281	193	198	0.974747	74	74	4	4	21	1.43125	4	Schisto_mansoni.Chr_W.unplaced.SC_0272	13055	58219	1.31179	1	1	4935	228	246	154	159	0.968553	53	53	2	2	21	1.31179	3	Schisto_mansoni.Chr_W.unplaced.SC_0272	13055	58219	1.00847	1	1	4935	174	182	117	118
Smp_018170	-3.93919	0.00257002	zinc finger protein, putative	10.873	1	1	1542	470	470	470	470	1	0	0	0	0	1	10.873	30	Schisto_mansoni.Chr_W	33574748	33576289	8.02683	1	1	1542	304	304	304	304	1	0	0	0	0	1	8.02683	20	Schisto_mansoni.Chr_W	33574748	33576289	7.84996	1	1	1542	287	287	287	287
Smp_080730	-3.90672	6.68316e-05	serine/threonine kinase	8.49798	1	1	1528	370	370	364	364	1	136	136	2	2	6	8.49798	26	Schisto_mansoni.Chr_6	6817434	6820667	7.46087	1	1	1528	290	290	280	280	1	113	113	3	3	6	7.46087	18	Schisto_mansoni.Chr_6	6817434	6820667	8.47393	1	1	1528	316	316	307	307
Smp_074610	-3.90646	0.0516118	histone H3, putative	0.239952	1	1	446	3	3	3	3	1	0	0	0	0	1	0.239952	0	Schisto_mansoni.SC_0144	738385	738830	0.182579	1	1	446	2	2	2	2	1	0	0	0	0	1	0.182579	0	Schisto_mansoni.SC_0144	738385	738830	0.189132	1	1	446	2	2	2	2
Smp_087310	-3.82462	0.0504728	hypothetical protein	0.583604	1	1	489	19	19	8	8	1	3	3	2	2	3	0.583604	1	Schisto_mansoni.Chr_4	19149312	19164028	0.333047	1	1	489	13	13	4	4	1	1	1	0	0	3	0.333047	0	Schisto_mansoni.Chr_4	19149312	19164028	0.345001	1	1	489	14	14	4	4
Smp_203990	-3.81526	0.131252		0.0974667	1	1	366	1	1	1	1	1	0	0	0	0	1	0.0974667	0	Schisto_mansoni.Chr_W	52863273	52863638	0.111243	1	1	366	1	1	1	1	1	0	0	0	0	1	0.111243	0	Schisto_mansoni.Chr_W	52863273	52863638	0.230472	1	1	366	2	2	2	2
Smp_171370	-3.70879	2.63316e-05	serine/threonine kinase	1.69958	1	1	1952	128	128	93	93	1	51	51	3	3	12	1.69958	5	Schisto_mansoni.Chr_4	32005252	32024465	1.58522	1	1	1952	95	96	76	76	1	41	41	3	3	12	1.58522	3	Schisto_mansoni.Chr_4	32005252	32024465	1.77176	1	1	1952	96	96	82	82
Smp_017720	-3.66109	0.00424825	zinc finger protein, putative	0.717557	1	1	696	31	31	14	14	1	0	0	7	7	5	0.717557	1	Schisto_mansoni.Chr_W	4305332	4323249	0.877479	1	1	696	22	22	15	15	1	3	3	7	7	5	0.877479	1	Schisto_mansoni.Chr_W	4305332	4323249	0.605983	1	1	696	18	19	10	10
Smp_204060	-3.66089	0.0958836		0.0600553	1	1	1188	2	2	2	2	1	0	0	0	0	1	0.0600553	0	Schisto_mansoni.Chr_W	8409798	8410985	0.0342719	1	1	1188	1	1	1	1	1	0	0	0	0	1	0.0342719	0	Schisto_mansoni.Chr_W	8409798	8410985	0.035502	1	1	1188	1	1	1	1
Smp_171700	-3.58189	0.327989	myst histone acetyltransferase, putative	0	1	0	159	0	0	0	0	#NUM!	0	0	0	0	1	0	0	Schisto_mansoni.SC_0542	9132	9290	0.256069	1	1	159	1	1	1	1	1	0	0	0	0	1	0.256069	1	Schisto_mansoni.SC_0542	9132	9290	0.530521	1	1	159	2	2	2	2
Smp_024860	-3.57234	0.00290621	basic helix-loop-helix transcription factor, hes- related	3.14298	1	1	1362	167	167	120	120	1	6	6	16	16	3	3.14298	8	Schisto_mansoni.Chr_6	11182182	11190355	2.72032	1	1	1362	135	135	91	91	1	8	8	8	8	3	2.72032	6	Schisto_mansoni.Chr_6	11182182	11190355	3.77792	1	1	1362	153	153	122	122
Smp_014080	-3.53562	0.000543376	lipopolysaccharide-induced transcription factor regulating tumor necrosis factor alpha, putative	13.5609	1	1	413	193	194	157	157	1	53	53	0	0	3	13.5609	43	Schisto_mansoni.Chr_W	49185996	49201778	12.8159	1	1	413	160	161	130	130	1	44	44	1	1	3	12.8159	38	Schisto_mansoni.Chr_W	49185996	49201778	16.1353	1	1	413	191	191	158	158
Smp_077890	-3.51004	0.0790273		0.0560013	1	1	1274	2	2	2	2	1	0	0	0	0	1	0.0560013	0	Schisto_mansoni.Chr_3.unplaced.SC_0044	406580	407853	0.127834	1	1	1274	3	4	3	4	0.75	0	0	0	0	1	0.127834	0	Schisto_mansoni.Chr_3.unplaced.SC_0044	406580	407853	0.066211	1	1	1274	2	2	2	2
Smp_170410	-3.49819	0.530049		0	1	0	893	0	0	0	0	#NUM!	0	0	0	0	3	0	0	Schisto_mansoni.Chr_2	1434915	1435910	0.136781	1	1	893	3	3	3	3	1	0	0	0	0	3	0.136781	0	Schisto_mansoni.Chr_2	1434915	1435910	0	1	0	893	0	0	0	0
Smp_004060	-3.45406	6.86008e-05	cell division cycle 20 (cdc20) (fizzy), putative	3.41668	1	1	1587	155	155	152	152	1	71	71	0	0	7	3.41668	9	Schisto_mansoni.Chr_1	5682100	5691939	3.28389	1	1	1587	136	137	128	128	1	37	37	0	0	7	3.28389	8	Schisto_mansoni.Chr_1	5682100	5691939	3.29545	1	1	1587	132	132	124	124
Smp_186920	-3.4515	0.0746996		0.466311	1	1	612	2	8	2	8	0.25	0	0	0	0	1	0.466311	1	Schisto_mansoni.Chr_W	45082724	45083335	0.266111	1	1	612	0	4	0	4	0	0	0	0	0	1	0.266111	0	Schisto_mansoni.Chr_W	45082724	45083335	0.689157	1	1	612	3	10	3	10
Smp_163860	-3.43749	0.353876		0.0625839	1	0	570	2	2	1	1	1	0	0	1	1	2	0.0625839	0	Schisto_mansoni.Chr_W	58129188	58131922	0	1	0	570	2	2	0	0	#NUM!	0	0	0	0	2	0	0	Schisto_mansoni.Chr_W	58129188	58131922	0.147987	1	1	570	8	8	2	2
Smp_102430	-3.39563	0.0774905	hypothetical protein	0.167478	1	1	213	21	21	1	1	1	1	1	0	0	4	0.167478	0	Schisto_mansoni.Chr_1	61260617	61277960	0.19115	1	1	213	14	14	1	1	1	1	1	0	0	4	0.19115	0	Schisto_mansoni.Chr_1	61260617	61277960	0.198011	1	1	213	9	9	1	1
Smp_074250	-3.39563	0.0774905	hypothetical protein	0.0792729	1	1	450	0	1	0	1	0	0	0	0	0	2	0.0792729	0	Schisto_mansoni.Chr_6	565649	566132	0.0904779	1	1	450	0	1	0	1	0	0	0	0	0	2	0.0904779	0	Schisto_mansoni.Chr_6	565649	566132	0.0937254	1	1	450	0	1	0	1
Smp_013600	-3.39563	0.0774905	nk homeobox protein, putative	0.0218986	1	1	1629	1	1	1	1	1	1	1	0	0	2	0.0218986	0	Schisto_mansoni.Chr_3	9917141	9919856	0.0249939	1	1	1629	2	2	1	1	1	1	1	0	0	2	0.0249939	0	Schisto_mansoni.Chr_3	9917141	9919856	0.025891	1	1	1629	1	1	1	1
Smp_203710	-3.3754	0.309201		0.54671	1	1	261	1	4	1	4	0.25	1	1	0	1	2	0.54671	2	Schisto_mansoni.Chr_W	36067078	36067564	0	1	0	261	0	0	0	0	#NUM!	0	0	0	0	2	0	0	Schisto_mansoni.Chr_W	36067078	36067564	0.807977	1	1	261	3	5	3	5
Smp_166150	-3.37267	0.134734	serine/threonine kinase	1.00259	1	1	3309	216	218	93	93	1	44	44	4	4	15	1.00259	2	Schisto_mansoni.Chr_4	19777611	19807855	2.52239	1	1	3309	342	351	205	205	1	90	90	5	5	15	2.52239	6	Schisto_mansoni.Chr_4	19777611	19807855	0.968694	1	1	3309	182	183	76	76
Smp_188270	-3.35378	0.356132	metastasis-associated protein related	0.122587	1	1	291	0	1	0	1	0	0	0	0	0	1	0.122587	0	Schisto_mansoni.Chr_1.unplaced.SC_0210	97622	97912	0.279828	1	1	291	0	2	0	2	0	0	0	0	0	1	0.279828	0	Schisto_mansoni.Chr_1.unplaced.SC_0210	97622	97912	0	1	0	291	0	0	0	0
Smp_199150	-3.34158	0.00493337	DNA repair protein rad51 homolog 3, r51h3, putative	0.373258	1	1	2007	104	107	21	21	1	3	3	3	3	11	0.373258	1	Schisto_mansoni.SC_0218	309472	327964	0.304298	1	1	2007	93	95	15	15	1	0	0	3	3	11	0.304298	0	Schisto_mansoni.SC_0218	309472	327964	0.378264	1	1	2007	68	70	18	18
Smp_203070	-3.33575	0.40812		0.237819	1	1	150	3	3	1	1	1	1	1	0	0	2	0.237819	1	Schisto_mansoni.Chr_6	17469442	17469966	0	1	0	150	0	0	0	0	#NUM!	0	0	0	0	2	0	0	Schisto_mansoni.Chr_6	17469442	17469966	0.843528	1	1	150	5	5	3	3
Smp_104210	-3.30918	0.0108931	opsin-like receptor, putative	0.188745	1	1	945	22	22	5	5	1	2	2	0	0	6	0.188745	0	Schisto_mansoni.Chr_W	45188517	45204586	0.172339	1	1	945	17	17	4	4	1	2	2	0	0	6	0.172339	0	Schisto_mansoni.Chr_W	45188517	45204586	0.178525	1	1	945	14	14	4	4
Smp_205190	-3.3083	0.17579		0.224357	1	1	318	2	2	2	2	1	0	0	0	0	1	0.224357	1	Schisto_mansoni.SC_0248	10554	10871	0.512139	1	1	318	4	4	4	4	1	0	0	0	0	1	0.512139	1	Schisto_mansoni.SC_0248	10554	10871	0.13263	1	1	318	1	1	1	1
Smp_205070	-3.25123	0.331941		0.37749	1	1	189	2	2	2	2	1	0	0	0	0	1	0.37749	2	Schisto_mansoni.SC_0221	154094	154282	0	1	0	189	0	0	0	0	#NUM!	0	0	0	0	1	0	0	Schisto_mansoni.SC_0221	154094	154282	0.223156	1	1	189	1	1	1	1
Smp_079050	-3.20948	2.91678e-05	DNA primase large subunit, putative	5.73916	1	1	1902	339	340	306	306	1	74	74	7	7	6	5.73916	17	Schisto_mansoni.SC_0234	71380	84418	6.27209	1	1	1902	315	319	292	293	0.996587	69	69	4	4	6	6.27209	17	Schisto_mansoni.SC_0234	71380	84418	5.94284	1	1	1902	302	302	268	268
Smp_185750	-3.20937	0.339235		0.117732	1	1	606	0	2	0	2	0	0	0	0	0	1	0.117732	0	Schisto_mansoni.SC_0183	107339	107944	0.0671865	1	1	606	0	1	0	1	0	0	0	0	0	1	0.0671865	0	Schisto_mansoni.SC_0183	107339	107944	0	1	0	606	0	0	0	0
Smp_054430	-3.20937	0.339235	zinc finger protein, putative	0.0639298	1	1	1116	2	2	2	2	1	0	0	0	0	1	0.0639298	0	Schisto_mansoni.Chr_W	41249663	41250778	0.036483	1	1	1116	1	1	1	1	1	0	0	0	0	1	0.036483	0	Schisto_mansoni.Chr_W	41249663	41250778	0	1	0	1116	0	0	0	0
Smp_138780	-3.16328	0.0118672	histone deacetylase, putative	3.111	1	1	516	51	51	45	45	1	31	31	0	0	4	3.111	10	Schisto_mansoni.Chr_3.unplaced.SC_0083	790070	800590	3.70854	1	1	516	53	54	47	47	1	37	37	0	0	4	3.70854	11	Schisto_mansoni.Chr_3.unplaced.SC_0083	790070	800590	2.45212	1	1	516	35	36	30	30
Smp_159480	-3.13939	0.0405499		1.63021	1	1	372	17	17	17	17	1	0	0	0	0	1	1.63021	4	Schisto_mansoni.Chr_W	9997119	9997490	1.53229	1	1	372	14	14	14	14	1	0	0	0	0	1	1.53229	4.5	Schisto_mansoni.Chr_W	9997119	9997490	0.793642	1	1	372	7	7	7	7
Smp_200870	-3.12724	0.28369		0.437167	1	1	408	4	5	4	5	0.8	0	0	0	0	1	0.437167	0	Schisto_mansoni.Chr_1	26673442	26673849	0.0997918	1	1	408	1	1	1	1	1	0	0	0	0	1	0.0997918	0	Schisto_mansoni.Chr_1	26673442	26673849	0.103374	1	1	408	1	1	1	1
Smp_176940	-3.1025	7.26307e-06	cationic amino acid transporter, putative	28.162	1	1	2541	2171	2183	2006	2006	1	570	570	99	99	9	28.162	79	Schisto_mansoni.Chr_1	56566940	56604449	27.1594	1	1	2541	1806	1821	1695	1695	1	500	500	87	87	9	27.1594	67	Schisto_mansoni.Chr_1	56566940	56604449	27.8188	1	1	2541	1795	1808	1676	1676
Smp_146220	-3.08115	0.173941	calcium-binding protein, putative	0.196005	1	1	546	905	905	3	3	1	2	2	0	0	4	0.196005	0	Schisto_mansoni.Chr_W	12880461	12889455	0.596557	1	1	546	735	735	8	8	1	5	5	3	3	4	0.596557	0	Schisto_mansoni.Chr_W	12880461	12889455	0.231739	1	1	546	708	708	3	3
Smp_204430	-3.07763	0.00692121		0.977338	1	1	219	6	6	6	6	1	0	0	0	0	1	0.977338	3	Schisto_mansoni.SC_0037	141004	141222	1.11548	1	1	219	6	6	6	6	1	0	0	0	0	1	1.11548	2	Schisto_mansoni.SC_0037	141004	141222	1.3481	1	1	219	7	7	7	7
Smp_148590	-3.07272	0.00109389		4.23113	1	1	489	73	73	58	58	1	40	40	3	3	4	4.23113	13	Schisto_mansoni.Chr_1	49424758	49428825	5.41202	1	1	489	89	89	65	65	1	39	39	2	2	4	5.41202	14	Schisto_mansoni.Chr_1	49424758	49428825	4.57127	1	1	489	71	71	53	53
Smp_193950	-3.06497	0.556696	hypothetical protein	0.126499	1	1	846	1	3	1	3	0.333333	0	0	0	0	1	0.126499	0	Schisto_mansoni.Chr_4.unplaced.SC_0032	1844760	1845605	0	1	0	846	0	0	0	0	#NUM!	0	0	0	0	1	0	0	Schisto_mansoni.Chr_4.unplaced.SC_0032	1844760	1845605	0	1	0	846	0	0	0	0
Smp_132510	-3.05682	0.00138321	breast cancer type 1 susceptibility protein brca1, putative	1.51726	1	1	2069	163	166	88	88	1	30	30	8	8	9	1.51726	4	Schisto_mansoni.Chr_3	23720882	23738434	1.57429	1	1	2069	153	155	80	80	1	24	24	6	6	9	1.57429	4	Schisto_mansoni.Chr_3	23720882	23738434	1.77349	1	1	2069	158	161	87	87
Smp_052390	-3.04199	0.0104214	origin recognition complex subunit, putative	2.35734	1	1	1483	99	99	98	98	1	26	26	6	6	6	2.35734	6	Schisto_mansoni.Chr_3	14019494	14022509	1.53745	1	1	1483	58	58	56	56	1	15	15	0	0	6	1.53745	4	Schisto_mansoni.Chr_3	14019494	14022509	1.64952	1	1	1483	58	58	58	58
Smp_140240	-3.00125	0.000634971	hypothetical protein	3.80908	1	1	1077	136	136	115	115	1	49	49	3	3	7	3.80908	11	Schisto_mansoni.Chr_7	3854533	3862188	4.38528	1	1	1077	142	142	116	116	1	45	45	3	3	7	4.38528	11	Schisto_mansoni.Chr_7	3854533	3862188	4.15107	1	1	1077	129	129	106	106
Smp_128210	-2.99997	0.0106867	claspin-like protein	0.678191	1	1	3945	139	149	75	75	1	45	45	2	2	26	0.678191	2	Schisto_mansoni.Chr_2	26932829	26973928	0.815333	1	1	3945	140	157	79	79	1	41	41	2	2	26	0.815333	2	Schisto_mansoni.Chr_2	26932829	26973928	0.491791	1	1	3945	98	108	46	46
Smp_074710	-2.98474	0.0211184	hypothetical protein	0.620162	1	1	1323	61	61	23	23	1	9	9	0	0	5	0.620162	2	Schisto_mansoni.Chr_W	31863210	31906571	0.677045	1	1	1323	57	64	22	22	1	3	3	0	0	5	0.677045	2	Schisto_mansoni.Chr_W	31863210	31906571	1.05202	1	1	1323	71	76	33	33
Smp_142810	-2.95834	0.343734	alpha-amylase, putative	0.0189346	1	1	1884	2	2	1	1	1	0	0	0	0	9	0.0189346	0	Schisto_mansoni.Chr_4	30497033	30503369	0.0432219	1	1	1884	3	3	2	2	1	0	0	0	0	9	0.0432219	0	Schisto_mansoni.Chr_4	30497033	30503369	0.156706	1	1	1884	9	9	7	7
Smp_133660	-2.92613	2.37893e-05		0.869445	1	1	1395	201	205	34	34	1	19	19	0	0	9	0.869445	2	Schisto_mansoni.Chr_2	29764836	29793552	0.81722	1	1	1395	177	185	28	28	1	12	12	2	2	9	0.81722	2	Schisto_mansoni.Chr_2	29764836	29793552	0.876786	1	1	1395	168	175	29	29
Smp_169510	-2.92309	3.26954e-05	PI3kinase, putative	2.37534	1	1	2508	262	272	167	167	1	42	42	22	22	11	2.37534	1	Schisto_mansoni.SC_0164	248955	281906	2.45134	1	1	2508	245	256	151	151	1	59	59	17	17	11	2.45134	2	Schisto_mansoni.SC_0164	248955	281906	2.25345	1	1	2508	216	219	134	134
Smp_159610	-2.88808	0.133792		0.252999	1	1	846	6	6	6	6	1	0	0	0	0	1	0.252999	0	Schisto_mansoni.Chr_6	11268332	11269177	0.336886	1	1	846	7	7	7	7	1	0	0	0	0	1	0.336886	0	Schisto_mansoni.Chr_6	11268332	11269177	0.0997078	1	1	846	2	2	2	2
Smp_171320	-2.8867	0.31373	invadolysin (M08 family)	0.716322	1	1	498	15	15	10	10	1	0	0	7	7	4	0.716322	1	Schisto_mansoni.SC_0132	505689	508030	0.0817571	1	0	498	10	10	1	1	1	0	0	1	1	4	0.0817571	0	Schisto_mansoni.SC_0132	505689	508030	0.254075	1	0	498	14	14	3	3
Smp_197890	-2.8813	0.29785		0.0757385	1	1	471	2	3	0	1	0	0	0	0	0	3	0.0757385	0	Schisto_mansoni.Chr_4	7987352	7990970	0.345775	1	1	471	6	10	0	4	0	0	2	0	0	3	0.345775	0	Schisto_mansoni.Chr_4	7987352	7990970	0.0895465	1	1	471	0	1	0	1
Smp_101780	-2.87378	0.188673	ebna2 binding protein P100, putative	0.394175	1	1	543	0	6	0	6	0	0	0	0	0	1	0.394175	0	Schisto_mansoni.Chr_3.unplaced.SC_0220	20003	20545	0.149963	1	1	543	0	2	0	2	0	0	0	0	0	1	0.149963	0	Schisto_mansoni.Chr_3.unplaced.SC_0220	20003	20545	0.155346	1	1	543	0	2	0	2
Smp_029620	-2.87128	0.131978	Homeobox protein SMOX-4, putative	0.123435	1	1	578	2	2	2	2	1	0	0	0	0	1	0.123435	0	Schisto_mansoni.Chr_3	18502936	18503513	0.140883	1	1	578	2	2	2	2	1	0	0	0	0	1	0.140883	0	Schisto_mansoni.Chr_3	18502936	18503513	0.291878	1	1	578	4	4	4	4
Smp_206030	-2.87109	0.0558208		1.00257	1	1	1530	46	46	43	43	1	2	2	0	0	2	1.00257	2	Schisto_mansoni.SC_1243	1152	5148	0.93139	1	1	1530	42	42	35	35	1	1	1	1	1	2	0.93139	2	Schisto_mansoni.SC_1243	1152	5148	0.413494	1	1	1530	17	17	15	15
Smp_175590	-2.86662	6.92994e-05	tyrosine kinase	9.2882	1	1	2796	865	868	728	728	1	285	285	5	5	13	9.2882	25	Schisto_mansoni.Chr_1	19631133	19682367	8.69345	1	1	2796	717	723	597	597	1	232	232	2	2	13	8.69345	20	Schisto_mansoni.Chr_1	19631133	19682367	8.26634	1	1	2796	628	631	548	548
Smp_080030	-2.86468	0.0328279	GATA zinc finger domain-containing protein, putative	0.25166	1	1	567	4	4	4	4	1	1	1	0	0	3	0.25166	1	Schisto_mansoni.Chr_W	24842240	24846769	0.502655	1	1	567	7	7	7	7	1	4	4	0	0	3	0.502655	1	Schisto_mansoni.Chr_W	24842240	24846769	0.446311	1	1	567	8	8	6	6
Smp_170490	-2.84887	0.409192		0.0675622	1	1	528	12	14	1	1	1	0	0	0	0	4	0.0675622	0	Schisto_mansoni.Chr_2	22220515	22240920	0	1	0	528	32	34	0	0	#NUM!	0	0	0	0	4	0	0	Schisto_mansoni.Chr_2	22220515	22240920	0.159759	1	0	528	14	15	2	2
Smp_145810	-2.79671	1.19565e-06	poly [ADP-ribose] polymerase, putative	9.50616	2	1	1805	521	526	481	481	1	240	240	7	7	11	9.50616	29	Schisto_mansoni.SC_0194	45435	61117	9.56409	2	1	1805	451	459	424	424	1	230	230	7	7	11	9.56409	25	Schisto_mansoni.SC_0194	45435	61117	9.22974	2	1	1805	423	427	395	395
Smp_158540	-2.78427	0.0607765	hypothetical protein	0.410032	1	1	435	6	6	5	5	1	0	0	0	0	2	0.410032	0	Schisto_mansoni.Chr_1	53315535	53317199	0.280793	1	1	435	3	3	3	3	1	0	0	0	0	2	0.280793	0	Schisto_mansoni.Chr_1	53315535	53317199	0.290872	1	1	435	3	3	3	3
Smp_132830	-2.78184	0.00585104	hypothetical protein	5.34593	1	1	714	135	135	107	107	1	51	51	16	16	5	5.34593	12	Schisto_mansoni.Chr_1.unplaced.SC_0010	998235	1002039	3.87762	1	1	714	82	82	68	68	1	30	30	7	7	5	3.87762	7	Schisto_mansoni.Chr_1.unplaced.SC_0010	998235	1002039	5.61171	1	1	714	113	113	95	95
Smp_155500	-2.77398	0.0232507	DNA polymerase theta, putative	0.415569	1	1	3777	63	63	44	44	1	12	12	6	6	15	0.415569	1	Schisto_mansoni.Chr_W	29824014	29849206	0.495868	1	1	3777	62	62	46	46	1	14	14	9	9	15	0.495868	1	Schisto_mansoni.Chr_W	29824014	29849206	0.267999	1	1	3777	37	38	24	24
Smp_204420	-2.77138	0.0347254		1.54142	1	1	162	7	7	7	7	1	0	0	0	0	1	1.54142	7	Schisto_mansoni.SC_0037	6458	6619	1.25664	1	1	162	5	5	5	5	1	0	0	0	0	1	1.25664	4	Schisto_mansoni.SC_0037	6458	6619	0.781045	1	1	162	3	3	3	3
Smp_177250	-2.76513	0.00143748	histone deacetylase, putative	3.90229	1	1	969	122	127	106	106	1	51	51	4	4	6	3.90229	11	Schisto_mansoni.Chr_3.unplaced.SC_0083	775526	786685	4.11772	1	1	969	136	137	98	98	1	49	49	1	1	6	4.11772	11	Schisto_mansoni.Chr_3.unplaced.SC_0083	775526	786685	3.74321	1	1	969	108	110	86	86
Smp_176450	-2.75377	0.0241432	ATP-binding cassette transporter, putative	0.15646	1	1	4560	38	39	19	20	0.95	2	2	0	0	2	0.15646	0	Schisto_mansoni.Chr_1	3997552	4010618	0.196432	1	1	4560	28	30	21	22	0.954545	3	3	0	0	2	0.196432	0	Schisto_mansoni.Chr_1	3997552	4010618	0.12024	1	1	4560	22	24	12	13
Smp_139560	-2.7516	0.26358	hypothetical protein	0.202686	1	1	528	3	3	3	3	1	0	0	0	0	1	0.202686	0	Schisto_mansoni.SC_0125	439886	440413	0.694006	1	1	528	9	9	9	9	1	0	0	0	0	1	0.694006	1	Schisto_mansoni.SC_0125	439886	440413	0.159759	1	1	528	2	2	2	2
Smp_203960	-2.737	0.222721		0.509612	1	1	210	3	3	3	3	1	0	0	0	0	1	0.509612	1	Schisto_mansoni.Chr_W	51524895	51525104	0.387762	1	1	210	2	2	2	2	1	0	0	0	0	1	0.387762	0	Schisto_mansoni.Chr_W	51524895	51525104	0.20084	1	1	210	1	1	1	1
Smp_185130	-2.72871	0.0713948		1.89566	1	1	207	0	11	0	11	0	0	0	0	0	1	1.89566	5	Schisto_mansoni.SC_0247	157936	158142	1.77022	1	1	207	0	9	0	9	0	0	0	0	0	1	1.77022	4	Schisto_mansoni.SC_0247	157936	158142	1.01875	1	1	207	0	5	0	5
Smp_022450	-2.71332	0.000101862	hypothetical protein	42.3115	1	1	446	1061	1062	529	529	1	186	186	26	26	3	42.3115	125	Schisto_mansoni.Chr_W	5760489	5771173	42.4495	1	1	446	955	960	465	465	1	162	162	27	27	3	42.4495	100.5	Schisto_mansoni.Chr_W	5760489	5771173	45.6754	1	1	446	989	990	483	483
Smp_199650	-2.70153	0.0690675	kif1, putative	0.594547	1	1	120	2	2	2	2	1	0	0	0	0	1	0.594547	2	Schisto_mansoni.SC_0390	8304	8423	1.01788	1	1	120	3	3	3	3	1	0	0	0	0	1	1.01788	3	Schisto_mansoni.SC_0390	8304	8423	1.05441	1	1	120	3	3	3	3
Smp_180660	-2.67922	0.269694		0.5545	1	1	579	20	20	9	9	1	0	0	2	2	2	0.5545	1	Schisto_mansoni.Chr_W	9623409	9631489	0.0703196	1	1	579	7	7	1	1	1	0	0	0	0	2	0.0703196	0	Schisto_mansoni.Chr_W	9623409	9631489	0.801279	1	1	579	22	22	11	11
Smp_178050	-2.63366	0.262819		0.0843329	1	1	423	0	1	0	1	0	0	0	0	0	1	0.0843329	0	Schisto_mansoni.Chr_1	60739407	60739829	0.0962531	1	1	423	0	1	0	1	0	0	0	0	0	1	0.0962531	0	Schisto_mansoni.Chr_1	60739407	60739829	0.299124	1	1	423	0	3	0	3
Smp_158890	-2.62938	0.000847397	hypothetical protein	9.23003	1	1	429	1030	1047	111	111	1	1	1	94	94	8	9.23003	6	Schisto_mansoni.Chr_4	981938	998686	9.77541	1	1	429	913	928	103	103	1	2	2	85	85	8	9.77541	6	Schisto_mansoni.Chr_4	981938	998686	8.45495	1	1	429	790	794	86	86
Smp_136830	-2.61469	0.112327	subfamily A1A unassigned peptidase (A01 family)	0.0467534	2	0	763	56	62	1	1	1	1	1	0	0	6	0.0467534	0	Schisto_mansoni.Chr_3	23488372	23543706	0.106724	2	0	763	46	50	2	2	1	2	2	0	0	6	0.106724	0	Schisto_mansoni.Chr_3	23488372	23543706	0.110554	2	0	763	40	46	2	2
Smp_210110	-2.61465	0.0118364	SPFH domain / Band 7 family protein, putative	1.05083	1	1	1290	60	61	38	38	1	15	15	1	1	8	1.05083	3	Schisto_mansoni.Chr_1.unplaced.SC_0076	957849	994332	1.35717	1	1	1290	64	65	43	43	1	17	17	6	6	8	1.35717	3	Schisto_mansoni.Chr_1.unplaced.SC_0076	957849	994332	1.11163	1	1	1290	42	42	34	34
Smp_054010	-2.61145	0.00036907	cationic amino acid transporter, putative	1.09644	1	1	2310	110	110	71	71	1	30	30	1	1	10	1.09644	3	Schisto_mansoni.Chr_4	31281412	31300187	1.07516	1	1	2310	93	94	61	61	1	22	22	2	2	10	1.07516	2	Schisto_mansoni.Chr_4	31281412	31300187	0.931168	1	1	2310	73	73	51	51
Smp_078720	-2.59572	0.252767	hypothetical protein	0.050816	1	1	702	1	1	1	1	1	0	0	0	0	1	0.050816	0	Schisto_mansoni.Chr_4	22970787	22971488	0.173996	1	1	702	3	3	3	3	1	0	0	0	0	1	0.173996	0	Schisto_mansoni.Chr_4	22970787	22971488	0.0600804	1	1	702	1	1	1	1
Smp_016240	-2.5782	0.00192978	hypothetical protein	0.523135	1	1	1432	22	22	21	21	1	13	13	0	0	9	0.523135	1.5	Schisto_mansoni.Chr_4	27470796	27476870	0.483349	1	1	1432	18	18	17	17	1	11	11	0	0	9	0.483349	1	Schisto_mansoni.Chr_4	27470796	27476870	0.589056	1	1	1432	22	22	20	20
Smp_135530	-2.5767	3.62865e-05	leishmanolysin-2 (M08 family)	24.4289	1	1	3363	3984	4278	2303	2303	1	998	998	278	278	23	24.4289	78	Schisto_mansoni.Chr_4	11297479	11360219	26.7075	1	1	3363	3782	4021	2206	2206	1	1024	1024	239	239	23	26.7075	65	Schisto_mansoni.Chr_4	11297479	11360219	25.9981	1	1	3363	3369	3597	2073	2073
Smp_137320	-2.56487	0.00457789	G-protein coupled receptor fragment, putative	3.98088	1	1	690	77	77	77	77	1	0	0	22	22	2	3.98088	12	Schisto_mansoni.Chr_1.unplaced.SC_0010	234793	235527	4.24853	1	1	690	72	72	72	72	1	1	1	24	24	2	4.24853	7	Schisto_mansoni.Chr_1.unplaced.SC_0010	234793	235527	3.17851	1	1	690	52	52	52	52
Smp_067260	-2.55655	0.000272012	transforming growth factor-beta receptor type I, putative	1.81906	1	1	1863	152	152	95	95	1	42	42	9	9	13	1.81906	5	Schisto_mansoni.Chr_1	53392096	53407252	1.70466	1	1	1863	129	130	78	78	1	33	33	8	8	13	1.70466	4	Schisto_mansoni.Chr_1	53392096	53407252	1.63001	1	1	1863	124	124	72	72
Smp_179250	-2.53647	0.276929	alpha-galactosidase/alpha-n-acetylgalactosamini da se,putative	0.410918	1	1	1389	15	18	13	16	0.8125	4	4	2	2	3	0.410918	1	Schisto_mansoni.Chr_6	1284778	1297903	0.0293125	1	1	1389	3	3	1	1	1	0	0	0	0	3	0.0293125	0	Schisto_mansoni.Chr_6	1284778	1297903	0.273281	1	1	1389	7	10	6	9
Smp_146920	-2.52023	0.415227	hypothetical protein	0.0712032	1	0	501	1	1	1	1	1	0	0	1	1	3	0.0712032	0	Schisto_mansoni.Chr_2	32250599	32251584	0.0812676	1	1	501	1	1	1	1	1	0	0	0	0	3	0.0812676	0	Schisto_mansoni.Chr_2	32250599	32251584	0.336738	1	1	501	6	6	4	4
Smp_004530	-2.51629	0.0339765		0.336536	1	1	318	2	3	2	3	0.666667	0	0	0	0	1	0.336536	1	Schisto_mansoni.SC_0037	134968	135285	0.512139	1	1	318	1	4	1	4	0.25	0	0	0	0	1	0.512139	1	Schisto_mansoni.SC_0037	134968	135285	0.530521	1	1	318	2	4	2	4
Smp_132810	-2.51495	0.0406067	IPR001092 Basic helix-loop-helix dimerisation region bHLH,domain-containing protein	0.383579	1	1	1395	17	17	15	15	1	0	0	0	0	4	0.383579	1	Schisto_mansoni.Chr_1.unplaced.SC_0010	1100944	1105359	0.204305	1	1	1395	9	9	7	7	1	0	0	0	0	4	0.204305	0	Schisto_mansoni.Chr_1.unplaced.SC_0010	1100944	1105359	0.393042	1	1	1395	13	13	13	13
Smp_181720	-2.51197	0.60584		0	1	0	171	1	3	0	0	#NUM!	0	0	0	0	3	0	0	Schisto_mansoni.SC_0475	55	1238	0.714299	1	0	171	4	5	3	3	1	0	0	3	3	3	0.714299	0	Schisto_mansoni.SC_0475	55	1238	0	1	0	171	4	5	0	0
Smp_150240	-2.47881	0.083797	hypothetical protein	0.260114	1	1	960	19	19	7	7	1	0	0	6	6	16	0.260114	0	Schisto_mansoni.Chr_3	13927499	13935405	0.169646	1	1	960	7	7	4	4	1	1	1	3	3	16	0.169646	0	Schisto_mansoni.Chr_3	13927499	13935405	0.307536	1	1	960	14	14	7	7
Smp_200200	-2.46838	0.462654		0.205016	1	1	174	1	1	1	1	1	0	0	0	0	1	0.205016	1	Schisto_mansoni.Chr_1	61977630	61977803	0	1	0	174	0	0	0	0	#NUM!	0	0	0	0	1	0	0	Schisto_mansoni.Chr_1	61977630	61977803	0.484786	1	1	174	2	2	2	2
Smp_204480	-2.4631	0.280195		0.336536	1	1	318	3	3	3	3	1	0	0	0	0	1	0.336536	0	Schisto_mansoni.SC_0041	58715	59032	1.02428	1	1	318	8	8	8	8	1	0	0	0	0	1	1.02428	2	Schisto_mansoni.SC_0041	58715	59032	0.265261	1	1	318	2	2	2	2
Smp_141250	-2.46029	0.159178	Jagged	0.503477	1	1	2409	53	53	34	34	1	4	4	2	2	9	0.503477	1	Schisto_mansoni.Chr_1	13973392	14006851	2.07885	1	1	2409	155	155	123	123	1	19	19	9	9	9	2.07885	5	Schisto_mansoni.Chr_1	13973392	14006851	1.41814	1	1	2409	104	105	81	81
Smp_129880	-2.44955	0.176113	hypothetical protein	0.509612	1	1	210	17	17	3	3	1	0	0	0	0	2	0.509612	0	Schisto_mansoni.Chr_1	19259620	19260787	0.193881	1	0	210	13	13	1	1	1	0	0	1	1	2	0.193881	0	Schisto_mansoni.Chr_1	19259620	19260787	0.60252	1	0	210	8	8	3	3
Smp_171110	-2.43832	0.226527		0.0475638	1	0	750	4	4	1	1	1	0	0	1	1	5	0.0475638	0	Schisto_mansoni.Chr_2	22483842	22496635	0.0542867	1	1	750	4	4	1	1	1	0	0	0	0	5	0.0542867	0	Schisto_mansoni.Chr_2	22483842	22496635	0.0562352	1	1	750	5	5	1	1
Smp_176500	-2.43595	0.0017067	mitotic and DNA damage checkpoint protein hus1, putative	0.971527	1	1	2607	194	202	71	71	1	28	28	11	11	16	0.971527	2	Schisto_mansoni.Chr_3.unplaced.SC_0141	234830	279385	0.999525	1	1	2607	151	156	64	64	1	17	17	14	14	16	0.999525	2	Schisto_mansoni.Chr_3.unplaced.SC_0141	234830	279385	0.841263	1	1	2607	137	142	52	52
Smp_127290	-2.43003	0.482454	hypothetical protein	1.12179	1	1	159	69	69	5	5	1	0	0	3	3	2	1.12179	3	Schisto_mansoni.SC_0187	135167	137471	0	1	0	159	50	50	0	0	#NUM!	0	0	0	0	2	0	0	Schisto_mansoni.SC_0187	135167	137471	0.265261	1	0	159	51	51	1	1
Smp_160630	-2.41015	0.0540469	DNA repair protein rad51 homolog 3, r51h3, putative	0.418041	1	1	768	11	11	9	9	1	1	1	0	0	5	0.418041	1	Schisto_mansoni.SC_0240	5137	10276	0.795216	1	1	768	17	17	15	15	1	9	9	0	0	5	0.795216	2	Schisto_mansoni.SC_0240	5137	10276	0.494255	1	1	768	12	12	9	9
Smp_105360	-2.40217	0.000224144	notch	2.46019	1	1	3393	256	257	234	234	1	40	40	6	6	10	2.46019	7	Schisto_mansoni.Chr_1	1426087	1452284	2.20795	1	1	3393	204	206	184	184	1	29	29	5	5	10	2.20795	5	Schisto_mansoni.Chr_1	1426087	1452284	2.43636	1	1	3393	208	208	196	196
Smp_094140	-2.40046	9.83829e-05	DNA replication licensing factor MCM6, putative	9.66859	1	1	2579	739	740	699	699	1	405	405	13	13	15	9.66859	28	Schisto_mansoni.SC_0170	322114	336407	9.3302	1	1	2579	617	618	591	591	1	319	319	14	14	15	9.3302	25	Schisto_mansoni.SC_0170	322114	336407	10.5645	1	1	2579	687	688	646	646
Smp_170840	-2.39836	0.307869	alpha-galactosidase/alpha-n-acetylgalactosamini da se,putative	0.0347688	1	1	1026	1	1	1	1	1	0	0	0	0	3	0.0347688	0	Schisto_mansoni.Chr_6	1337890	1339984	0.158733	1	1	1026	4	4	4	4	1	0	0	2	2	3	0.158733	0	Schisto_mansoni.Chr_6	1337890	1339984	0.246646	1	1	1026	7	7	6	6
Smp_132780	-2.39229	0.209067		0.422164	1	1	507	6	6	6	6	1	0	0	0	0	1	0.422164	1	Schisto_mansoni.Chr_1.unplaced.SC_0010	1258560	1259066	0.481835	1	1	507	6	6	6	6	1	0	0	0	0	1	0.481835	1	Schisto_mansoni.Chr_1.unplaced.SC_0010	1258560	1259066	0.0831882	1	1	507	1	1	1	1
Smp_144960	-2.3889	0.00117804		5.43381	1	1	4799	843	843	731	731	1	57	57	134	134	14	5.43381	11	Schisto_mansoni.Chr_4	21985859	22031990	4.75956	1	1	4799	650	651	561	561	1	38	38	114	114	14	4.75956	10	Schisto_mansoni.Chr_4	21985859	22031990	4.28004	1	1	4799	556	558	487	487
Smp_161820	-2.38204	0.00239566		3.24889	1	1	549	55	55	50	50	1	25	25	0	0	4	3.24889	10	Schisto_mansoni.Chr_1	25588029	25592222	2.81816	1	1	549	44	45	38	38	1	20	20	0	0	4	2.81816	6	Schisto_mansoni.Chr_1	25588029	25592222	3.30344	1	1	549	47	47	43	43
Smp_138650	-2.37398	0.426145		0	1	0	846	0	0	0	0	#NUM!	0	0	0	0	1	0	0	Schisto_mansoni.SC_0246	121789	122634	0.0481265	1	1	846	0	1	0	1	0	0	0	0	0	1	0.0481265	0	Schisto_mansoni.SC_0246	121789	122634	0.0498539	1	1	846	0	1	0	1
Smp_202370	-2.37398	0.426145		0	1	0	249	1	1	0	0	#NUM!	0	0	0	0	2	0	0	Schisto_mansoni.Chr_3.unplaced.SC_0105	978592	981119	0.163514	1	1	249	2	2	1	1	1	0	0	0	0	2	0.163514	0	Schisto_mansoni.Chr_3.unplaced.SC_0105	978592	981119	0.169383	1	1	249	2	2	1	1
Smp_162860	-2.37066	0.00139456		0.645027	1	1	2544	72	72	46	46	1	14	14	4	4	14	0.645027	2	Schisto_mansoni.Chr_W.unplaced.SC_0185	32040	60801	0.624169	1	1	2544	67	67	39	39	1	10	10	2	2	14	0.624169	1	Schisto_mansoni.Chr_W.unplaced.SC_0185	32040	60801	0.513942	1	1	2544	43	44	31	31
Smp_112090	-2.35305	0.501848	cercarial elastase (S01 family)	0	1	0	935	0	0	0	0	#NUM!	0	0	0	0	3	0	0	Schisto_mansoni.SC_0243	55611	57109	0.130637	1	1	935	2	3	2	3	0.666667	2	2	0	0	3	0.130637	0	Schisto_mansoni.SC_0243	55611	57109	0.0451085	1	1	935	1	1	1	1
Smp_138340	-2.34358	0.147279		0.0743184	1	1	960	2	2	2	2	1	0	0	1	1	2	0.0743184	0	Schisto_mansoni.Chr_3	19112960	19115639	0.084823	1	1	960	2	2	2	2	1	0	0	0	0	2	0.084823	0	Schisto_mansoni.Chr_3	19112960	19115639	0.131801	1	1	960	3	3	3	3
Smp_128800	-2.33463	0.456958		0.0574442	1	0	1242	33	34	2	2	1	0	0	2	2	4	0.0574442	0	Schisto_mansoni.Chr_2	15473871	15505216	0	1	0	1242	28	28	0	0	#NUM!	0	0	0	0	4	0	0	Schisto_mansoni.Chr_2	15473871	15505216	0.0339585	1	0	1242	19	19	1	1
Smp_101220	-2.33213	0.627349	hypothetical protein	0	1	0	159	0	0	0	0	#NUM!	0	0	0	0	1	0	0	Schisto_mansoni.Chr_6	18122786	18122944	0.512139	1	1	159	0	2	0	2	0	0	0	0	0	1	0.512139	2	Schisto_mansoni.Chr_6	18122786	18122944	0	1	0	159	0	0	0	0
Smp_200700	-2.33213	0.627349		0	1	0	168	0	0	0	0	#NUM!	0	0	0	0	1	0	0	Schisto_mansoni.Chr_1	18867356	18867523	0.484703	1	1	168	2	2	2	2	1	0	0	0	0	1	0.484703	1	Schisto_mansoni.Chr_1	18867356	18867523	0	1	0	168	0	0	0	0
Smp_060210	-2.33213	0.627349	lipopolysaccharide-induced transcription factor regulating tumor necrosis factor alpha, putative	0	1	0	363	0	0	0	0	#NUM!	0	0	0	0	3	0	0	Schisto_mansoni.Chr_W	41997005	42003854	0.224325	1	1	363	2	2	2	2	1	1	1	0	0	3	0.224325	0	Schisto_mansoni.Chr_W	41997005	42003854	0	1	0	363	0	0	0	0
Smp_089270	-2.33213	0.627349	alpha-galactosidase/alpha-n-acetylgalactosamini da se,putative	0	1	0	702	2	2	0	0	#NUM!	0	0	0	0	3	0	0	Schisto_mansoni.Chr_6	1316842	1337868	0.115997	1	1	702	5	5	2	2	1	0	0	1	1	3	0.115997	0	Schisto_mansoni.Chr_6	1316842	1337868	0	1	0	702	3	3	0	0
Smp_153400	-2.33213	0.627349	poly(A) polymerase cid (pap) (caffein-induced death protein), putative	0	1	0	561	0	0	0	0	#NUM!	0	0	0	0	3	0	0	Schisto_mansoni.Chr_5	2501272	2505411	0.145152	1	1	561	1	3	0	2	0	0	0	0	0	3	0.145152	0	Schisto_mansoni.Chr_5	2501272	2505411	0	1	0	561	0	0	0	0
Smp_162950	-2.33213	0.627349		0	1	0	783	0	0	0	0	#NUM!	0	0	0	0	1	0	0	Schisto_mansoni.Chr_W	55885170	55885952	0.103998	1	1	783	1	2	1	2	0.5	0	0	0	0	1	0.103998	0	Schisto_mansoni.Chr_W	55885170	55885952	0	1	0	783	0	0	0	0
Smp_035640	-2.31626	0.0629056	hypothetical protein	1.57737	1	1	294	29	30	13	13	1	0	0	4	4	2	1.57737	5	Schisto_mansoni.Chr_1	13421008	13426758	0.830919	1	1	294	24	24	6	6	1	0	0	3	3	2	0.830919	2	Schisto_mansoni.Chr_1	13421008	13426758	1.0042	1	1	294	20	20	7	7
Smp_124280	-2.31592	0.00365001		1.63151	1	1	809	61	61	37	37	1	11	11	1	1	4	1.63151	4	Schisto_mansoni.Chr_1	6060460	6066367	1.76147	1	1	809	44	44	35	35	1	8	8	1	1	4	1.76147	3	Schisto_mansoni.Chr_1	6060460	6066367	1.30335	1	1	809	34	34	25	25
Smp_101720	-2.30458	0.465871		0.149572	1	1	477	2	2	2	2	1	0	0	0	0	1	0.149572	0	Schisto_mansoni.Chr_3	1742503	1742979	0.0853565	1	1	477	1	1	1	1	1	0	0	0	0	1	0.0853565	0	Schisto_mansoni.Chr_3	1742503	1742979	0	1	0	477	0	0	0	0
Smp_187230	-2.30458	0.465871	hypothetical protein	0.0619858	1	1	1151	0	2	0	2	0	0	0	0	0	2	0.0619858	0	Schisto_mansoni.SC_0199	370395	371602	0.0353736	1	1	1151	0	1	0	1	0	0	0	0	0	2	0.0353736	0	Schisto_mansoni.SC_0199	370395	371602	0	1	0	1151	0	0	0	0
Smp_075110	-2.30076	0.00231353	rad1 DNA damage checkpoint protein, putative	2.71822	1	1	1168	129	129	89	89	1	42	42	4	4	6	2.71822	7	Schisto_mansoni.Chr_3	6866016	6872748	2.7887	1	1	1168	132	132	80	80	1	31	31	8	8	6	2.7887	7	Schisto_mansoni.Chr_3	6866016	6872748	2.38326	1	1	1168	101	101	66	66
Smp_177380	-2.28925	0.229899		0.503447	1	1	496	4	7	4	7	0.571429	0	0	0	3	2	0.503447	0	Schisto_mansoni.Chr_1	65404033	65404672	0.410434	1	1	496	3	6	3	5	0.6	0	0	0	1	2	0.410434	1	Schisto_mansoni.Chr_1	65404033	65404672	0.0850331	1	0	496	1	3	0	1
Smp_050380	-2.27353	0.00316958	protein kinase	0.849831	1	1	5331	208	219	127	127	1	24	24	17	17	14	0.849831	2	Schisto_mansoni.Chr_4.unplaced.SC_0032	280162	342714	0.710279	1	1	5331	156	165	93	93	1	6	6	9	9	14	0.710279	1	Schisto_mansoni.Chr_4.unplaced.SC_0032	280162	342714	0.640835	1	1	5331	135	146	81	81
Smp_137090	-2.25603	0.00050902	brca1 associated ring domain, putative	1.10274	1	1	2685	90	90	83	83	1	27	27	1	1	9	1.10274	3	Schisto_mansoni.Chr_4	6736171	6746795	1.13729	1	1	2685	80	80	75	75	1	20	20	0	0	9	1.13729	3	Schisto_mansoni.Chr_4	6736171	6746795	1.1624	1	1	2685	81	81	74	74
Smp_181510	-2.22957	0.460142		0.625839	2	0	57	35	80	1	1	1	0	0	1	1	5	0.625839	0	Schisto_mansoni.SC_0446	8316	22579	0	2	0	57	22	53	0	0	#NUM!	0	0	0	0	5	0	0	Schisto_mansoni.SC_0446	8316	22579	0.739937	2	0	57	35	71	1	1
Smp_201540	-2.22957	0.460142		0.129249	1	1	276	1	1	1	1	1	0	0	0	0	1	0.129249	0	Schisto_mansoni.Chr_2	18562875	18563150	0	1	0	276	0	0	0	0	#NUM!	0	0	0	0	1	0	0	Schisto_mansoni.Chr_2	18562875	18563150	0.152813	1	1	276	1	1	1	1
Smp_204650	-2.22957	0.460142		0.123864	1	1	288	1	1	1	1	1	0	0	0	0	1	0.123864	0	Schisto_mansoni.SC_0137	442244	442531	0	1	0	288	0	0	0	0	#NUM!	0	0	0	0	1	0	0	Schisto_mansoni.SC_0137	442244	442531	0.146446	1	1	288	1	1	1	1
Smp_205740	-2.22957	0.460142		0.152448	1	1	234	1	1	1	1	1	0	0	0	0	1	0.152448	0	Schisto_mansoni.SC_0579	8214	8447	0	1	0	234	0	0	0	0	#NUM!	0	0	0	0	1	0	0	Schisto_mansoni.SC_0579	8214	8447	0.180241	1	1	234	1	1	1	1
Smp_085700	-2.22957	0.460142	cAMP-dependent protein kinase catalytic subunit, putative	0.113247	1	1	315	1	1	1	1	1	0	0	0	0	1	0.113247	0	Schisto_mansoni.Chr_6	6586210	6586524	0	1	0	315	0	0	0	0	#NUM!	0	0	0	0	1	0	0	Schisto_mansoni.Chr_6	6586210	6586524	0.133893	1	1	315	0	1	0	1
Smp_170770	-2.22957	0.460142	hypothetical protein	0.0238295	1	1	1497	32	32	1	1	1	0	0	0	0	11	0.0238295	0	Schisto_mansoni.Chr_1	26178350	26211749	0	1	0	1497	28	30	0	0	#NUM!	0	0	0	0	11	0	0	Schisto_mansoni.Chr_1	26178350	26211749	0.028174	1	1	1497	27	28	1	1
Smp_141170	-2.22829	0.135549		0.559574	1	1	255	4	4	4	4	1	0	0	0	0	1	0.559574	1	Schisto_mansoni.Chr_1	14774911	14775165	0.479001	1	1	255	3	3	3	3	1	0	0	0	0	1	0.479001	1	Schisto_mansoni.Chr_1	14774911	14775165	1.15778	1	1	255	7	7	7	7
Smp_032500	-2.22555	7.50674e-05	DNA replication licensing factor MCM7, putative	9.15577	1	1	2365	641	647	607	607	1	313	313	5	5	13	9.15577	26	Schisto_mansoni.Chr_W	50960846	50980024	9.05544	1	1	2365	565	569	526	526	1	264	264	11	11	13	9.05544	22	Schisto_mansoni.Chr_W	50960846	50980024	9.02379	1	1	2365	540	543	506	506
Smp_193360	-2.21047	0.000179748	hypothetical protein	1.44864	1	1	3546	183	184	144	144	1	58	58	0	0	15	1.44864	4	Schisto_mansoni.Chr_4	27428101	27462241	1.56155	1	1	3546	179	182	136	136	1	55	55	2	2	15	1.56155	3	Schisto_mansoni.Chr_4	27428101	27462241	1.65328	1	1	3546	176	180	139	139
Smp_170370	-2.20088	0.645418	potassium-dependent sodium-calcium exchanger 3, 4,, putative	0.256639	1	1	834	14	14	6	6	1	0	0	0	0	4	0.256639	0	Schisto_mansoni.Chr_2	1680559	1686012	0	1	0	834	0	0	0	0	#NUM!	0	0	0	0	4	0	0	Schisto_mansoni.Chr_2	1680559	1686012	0	1	0	834	0	0	0	0
Smp_077180	-2.19676	0.000287566	serine/threonine kinase	1.80859	1	1	1716	89	89	87	87	1	28	28	0	0	8	1.80859	5	Schisto_mansoni.Chr_W	59136768	59143769	2.06422	1	1	1716	91	91	87	87	1	37	37	0	0	8	2.06422	5	Schisto_mansoni.Chr_W	59136768	59143769	1.86795	1	1	1716	79	79	76	76
Smp_171000	-2.19028	0.0711368		1.03075	1	1	796	40	40	23	23	1	8	8	5	5	4	1.03075	3	Schisto_mansoni.Chr_2	2939749	2947685	0.767243	1	1	796	28	29	15	15	1	4	4	1	1	4	0.767243	1	Schisto_mansoni.Chr_2	2939749	2947685	0.953738	1	1	796	28	28	18	18
Smp_114540	-2.18963	0.624596		0	1	0	831	0	0	0	0	#NUM!	0	0	0	0	1	0	0	Schisto_mansoni.Chr_W	7534863	7535693	0	1	0	831	0	0	0	0	#NUM!	0	0	0	0	1	0	0	Schisto_mansoni.Chr_W	7534863	7535693	0.203015	1	1	831	0	4	0	4
Smp_149060	-2.18903	0.407813	hypothetical protein	0.106169	1	1	336	1	1	1	1	1	0	0	0	0	2	0.106169	0	Schisto_mansoni.Chr_4.unplaced.SC_0032	485699	490306	0.121176	1	0	336	2	2	1	1	1	0	0	1	1	2	0.121176	0	Schisto_mansoni.Chr_4.unplaced.SC_0032	485699	490306	0.5021	1	1	336	5	5	4	4
Smp_077500	-2.18772	0.469276	t-box protein-related	0.0649778	1	0	549	4	4	1	1	1	0	0	1	1	4	0.0649778	0	Schisto_mansoni.Chr_6	18739920	18748616	0.0741622	1	0	549	6	6	1	1	1	0	0	1	1	4	0.0741622	0	Schisto_mansoni.Chr_6	18739920	18748616	0	1	0	549	4	4	0	0
Smp_202410	-2.1842	0.237866		0.559574	1	1	255	4	4	4	4	1	0	0	0	0	1	0.559574	0	Schisto_mansoni.Chr_3.unplaced.SC_0220	42367	42621	0.638667	1	1	255	4	4	4	4	1	0	0	0	0	1	0.638667	1	Schisto_mansoni.Chr_3.unplaced.SC_0220	42367	42621	1.48858	1	1	255	9	9	9	9
Smp_118280	-2.18352	0.0347036		0.252999	1	1	564	0	4	0	4	0	0	0	0	0	1	0.252999	0	Schisto_mansoni.Chr_1	9884208	9884771	0.14438	1	1	564	0	2	0	2	0	0	0	0	0	1	0.14438	0	Schisto_mansoni.Chr_1	9884208	9884771	0.224343	1	1	564	0	3	0	3
Smp_151390	-2.17554	0.121275		1.66338	2	1	1587	71	75	71	74	0.959459	71	72	0	1	10	1.66338	4	Schisto_mansoni.SC_0214	274252	289837	1.38539	2	2	1587	54	54	54	54	1	54	54	0	0	10	1.38539	3	Schisto_mansoni.SC_0214	274252	289837	1.568	2	1	1587	55	60	55	59
Smp_056680	-2.17442	0.029796	cercarial elastase (S01 family)	0.625839	2	0	228	1	4	1	4	0.25	0	0	0	0	1	0.625839	2	Schisto_mansoni.SC_1734	3400	3627	0.535724	2	0	228	0	3	0	3	0	0	0	0	0	1	0.535724	1	Schisto_mansoni.SC_1734	3400	3627	0.369969	2	0	228	1	2	1	2
Smp_180330	-2.16923	0.404603		0.637015	1	0	168	15	16	3	3	1	0	0	3	3	9	0.637015	0	Schisto_mansoni.SC_0255	41016	46796	0.242351	1	0	168	8	8	1	1	1	0	0	1	1	9	0.242351	0	Schisto_mansoni.SC_0255	41016	46796	1.0042	1	0	168	22	24	4	4
Smp_188510	-2.16619	0.00849799	hypothetical protein	2.0114	1	1	1206	66	68	66	68	0.970588	0	0	0	0	1	2.0114	5	Schisto_mansoni.Chr_6	18578780	18579985	2.49827	1	1	1206	72	74	72	74	0.972973	0	0	0	0	1	2.49827	5	Schisto_mansoni.Chr_6	18578780	18579985	1.78358	1	1	1206	49	51	49	51
Smp_132080	-2.12527	0.00122033	sugar transporter, putative	6.10402	1	1	1350	345	346	231	231	1	0	0	13	13	2	6.10402	17	Schisto_mansoni.Chr_W	33181151	33203476	5.48899	1	1	1350	270	271	182	182	1	0	0	15	15	2	5.48899	13	Schisto_mansoni.Chr_W	33181151	33203476	6.81071	1	1	1350	279	281	218	218
Smp_152360	-2.1202	0.0247182		0.603346	1	1	946	4	16	4	16	0.25	0	0	0	0	1	0.603346	1	Schisto_mansoni.Chr_W	22873562	22874507	0.430392	1	1	946	2	10	2	10	0.2	0	0	0	0	1	0.430392	1	Schisto_mansoni.Chr_W	22873562	22874507	0.579591	1	1	946	3	13	3	13
Smp_178420	-2.11762	0.0858846	hypothetical protein	0.361427	1	1	987	10	10	10	10	1	0	0	0	0	1	0.361427	1	Schisto_mansoni.Chr_1.unplaced.SC_0010	277574	278560	0.61877	1	1	987	15	15	15	15	1	0	0	0	0	1	0.61877	1	Schisto_mansoni.Chr_1.unplaced.SC_0010	277574	278560	0.683711	1	1	987	16	16	16	16
Smp_141710	-2.11654	0.00099059	Hypothetical protein, putative	1.75298	1	1	4538	755	1039	223	223	1	53	53	17	17	21	1.75298	4	Schisto_mansoni.Chr_1	35132408	35177955	1.65982	1	1	4538	676	970	185	185	1	57	57	28	28	21	1.65982	3	Schisto_mansoni.Chr_1	35132408	35177955	1.45917	1	1	4538	611	868	157	157
Smp_199540	-2.10047	0.0342564	inositol 1,4,5-trisphosphate receptor, putative	0.267642	1	1	933	48	48	7	7	1	4	4	0	0	7	0.267642	1	Schisto_mansoni.SC_0325	15458	58634	0.305472	1	1	933	36	36	7	7	1	3	3	0	0	7	0.305472	0	Schisto_mansoni.SC_0325	15458	58634	0.180821	1	1	933	34	36	4	4
Smp_118890	-2.09953	0.0697103		2.17517	1	1	246	2	15	2	15	0.133333	0	0	0	0	1	2.17517	7	Schisto_mansoni.SC_0247	167135	167380	1.15856	1	1	246	0	7	0	7	0	0	0	0	0	1	1.15856	2	Schisto_mansoni.SC_0247	167135	167380	1.37159	1	1	246	1	8	1	8
Smp_000290	-2.09037	0.284103		0.149259	1	1	717	1	3	1	3	0.333333	0	0	0	0	1	0.149259	0	Schisto_mansoni.Chr_3.unplaced.SC_0044	427181	427897	0.283926	1	1	717	1	5	1	5	0.2	0	0	0	0	1	0.283926	1	Schisto_mansoni.Chr_3.unplaced.SC_0044	427181	427897	0.647058	1	1	717	1	11	1	11
Smp_166870	-2.08397	0.399745	hypothetical protein	0.118514	1	0	301	11	11	1	1	1	0	0	1	1	3	0.118514	0	Schisto_mansoni.SC_0224	64681	66596	0.405798	1	1	301	8	8	3	3	1	0	0	2	2	3	0.405798	0	Schisto_mansoni.SC_0224	64681	66596	1.12097	1	1	301	18	18	8	8
Smp_148690	-2.07887	4.42491e-06	serine/threonine kinase	5.45513	1	1	7651	1222	1222	1170	1170	1	379	379	38	38	26	5.45513	15	Schisto_mansoni.Chr_1	50003720	50036371	5.6834	1	1	7651	1119	1121	1068	1068	1	333	333	16	16	26	5.6834	13	Schisto_mansoni.Chr_1	50003720	50036371	5.62279	1	1	7651	1044	1044	1020	1020
Smp_205280	-2.07642	0.413095		0.648597	1	1	165	3	3	3	3	1	0	0	0	0	1	0.648597	2	Schisto_mansoni.SC_0271	75419	75583	0.493516	1	1	165	1	2	1	2	0.5	0	0	0	0	1	0.493516	1	Schisto_mansoni.SC_0271	75419	75583	0	1	0	165	0	0	0	0
Smp_200310	-2.07569	0.15056		1.12651	1	1	285	9	9	9	9	1	0	0	0	0	1	1.12651	4	Schisto_mansoni.Chr_1	4598039	4598323	2.00004	1	1	285	14	14	14	14	1	0	0	0	0	1	2.00004	5	Schisto_mansoni.Chr_1	4598039	4598323	1.03591	1	1	285	7	7	7	7
Smp_171400	-2.07512	0.286179	hypothetical protein	0.548813	1	1	195	6	6	3	3	1	0	0	0	0	3	0.548813	2	Schisto_mansoni.Chr_W	42369903	42371051	0.208795	1	0	195	1	1	1	1	1	0	0	1	1	3	0.208795	0	Schisto_mansoni.Chr_W	42369903	42371051	0.648868	1	1	195	3	3	3	3
Smp_163820	-2.0708	0.000682264	phospholipid-transporting atpase	4.88507	1	1	3936	818	831	539	539	1	83	83	51	51	10	4.88507	12	Schisto_mansoni.Chr_W	58225413	58308098	4.3239	1	1	3936	594	601	418	418	1	59	59	35	35	10	4.3239	10	Schisto_mansoni.Chr_W	58225413	58308098	4.14692	1	1	3936	522	530	387	387
Smp_076550	-2.07079	0.298513		0.82576	1	1	216	18	21	2	5	0.4	0	0	2	2	2	0.82576	2	Schisto_mansoni.SC_0149	137602	138645	1.31947	1	1	216	11	16	2	7	0.285714	0	0	1	1	2	1.31947	3	Schisto_mansoni.SC_0149	137602	138645	0.195261	1	1	216	7	8	0	1
Smp_203720	-2.06892	0.0913677		0.2623	1	1	408	12	13	3	3	1	1	1	0	0	4	0.2623	1	Schisto_mansoni.Chr_W	36778577	36790311	0.598751	1	1	408	14	14	6	6	1	1	1	3	3	4	0.598751	1	Schisto_mansoni.Chr_W	36778577	36790311	0.413494	1	1	408	7	8	4	4
Smp_165250	-2.04718	0.0805133	hypothetical protein	0.386697	1	0	369	32	32	4	4	1	0	0	4	4	2	0.386697	0	Schisto_mansoni.Chr_W	24848398	24853646	0.551694	1	1	369	19	19	5	5	1	0	0	1	1	2	0.551694	1	Schisto_mansoni.Chr_W	24848398	24853646	0.685795	1	1	369	22	22	6	6
Smp_067010	-2.0449	2.01276e-05	hypothetical protein	28.7702	2	2	2522	2741	2778	2034	2034	1	971	971	39	39	16	28.7702	83	Schisto_mansoni.Chr_4	9269157	9317312	28.6232	2	2	2522	2407	2441	1773	1773	1	890	890	50	50	16	28.6232	69	Schisto_mansoni.Chr_4	9269157	9317312	30.0018	2	2	2522	2304	2333	1794	1794
Smp_159520	-2.04331	0.670319	hypothetical protein	0.0474688	1	1	1503	36	37	2	2	1	0	0	0	0	7	0.0474688	0	Schisto_mansoni.Chr_W	10190669	10208690	0	1	0	1503	22	23	0	0	#NUM!	0	0	0	0	7	0	0	Schisto_mansoni.Chr_W	10190669	10208690	0	1	0	1503	19	19	0	0
Smp_049580	-2.0431	0.000114811	zinc finger protein, putative	42.1665	1	1	3774	4461	4461	4461	4461	1	0	0	0	0	1	42.1665	116	Schisto_mansoni.Chr_1	50039448	50043221	40.1864	1	1	3774	3725	3725	3725	3725	1	0	0	0	0	1	40.1864	92	Schisto_mansoni.Chr_1	50039448	50043221	37.6727	1	1	3774	3371	3371	3371	3371
Smp_157300	-2.03991	0.000178327	tyrosine kinase	17.3933	1	1	1932	1270	1273	942	942	1	384	384	95	95	10	17.3933	45	Schisto_mansoni.Chr_2	21069332	21098164	16.227	1	1	1932	1052	1056	770	770	1	310	310	71	71	10	16.227	37	Schisto_mansoni.Chr_2	21069332	21098164	16.8094	1	1	1932	1039	1040	770	770
Smp_144730	-2.02577	0.352607		0.0475638	1	1	750	1	1	1	1	1	0	0	0	0	2	0.0475638	0	Schisto_mansoni.Chr_7.unplaced.SC_0100	539507	542184	0.217147	1	1	750	4	4	4	4	1	0	0	0	0	2	0.217147	0	Schisto_mansoni.Chr_7.unplaced.SC_0100	539507	542184	0.337411	1	1	750	8	8	6	6
Smp_059600	-2.0169	0.00191259	tektin, putative	7.63002	1	1	720	387	395	154	154	1	37	37	10	10	5	7.63002	6	Schisto_mansoni.Chr_6	12411719	12444432	6.2769	1	1	720	308	309	111	111	1	30	30	2	2	5	6.2769	7	Schisto_mansoni.Chr_6	12411719	12444432	6.56078	1	1	720	291	292	112	112
Smp_149190	-2.01299	0.239071	hypothetical protein	0.448715	1	1	636	54	63	7	8	0.875	0	0	0	0	2	0.448715	0	Schisto_mansoni.Chr_4	25038784	25042879	0.128035	1	1	636	35	36	1	2	0.5	0	0	0	0	2	0.128035	0	Schisto_mansoni.Chr_4	25038784	25042879	0.331576	1	1	636	30	35	3	5
Smp_179670	-2.00624	0.035697	hypothetical protein	8.54045	1	1	543	145	145	130	130	1	0	0	120	120	7	8.54045	19	Schisto_mansoni.Chr_4	31938327	31955011	10.8723	1	1	543	166	167	145	145	1	2	2	118	118	7	10.8723	21	Schisto_mansoni.Chr_4	31938327	31955011	11.2626	1	1	543	162	162	145	145
Smp_189630	-2.00216	0.677485	multidrug resistance protein 1 (ATP-binding cassette C1), putative	0	1	0	243	0	0	0	0	#NUM!	0	0	0	0	1	0	0	Schisto_mansoni.Chr_W	49511788	49512030	0	1	0	243	0	0	0	0	#NUM!	0	0	0	0	1	0	0	Schisto_mansoni.Chr_W	49511788	49512030	0.347131	1	1	243	0	2	0	2
Smp_204090	-2.00184	0.191613		0.699467	1	1	204	4	4	4	4	1	0	0	0	0	1	0.699467	1.5	Schisto_mansoni.Chr_W	14481694	14481897	0.399167	1	1	204	2	2	2	2	1	0	0	0	0	1	0.399167	1	Schisto_mansoni.Chr_W	14481694	14481897	0.413494	1	1	204	2	2	2	2
Smp_061980	-1.98184	0.178528	hypothetical protein	1.56144	1	1	297	12	13	12	13	0.923077	0	0	0	0	1	1.56144	1	Schisto_mansoni.Chr_W	29887875	29888171	1.50796	1	1	297	11	11	11	11	1	0	0	0	0	1	1.50796	2	Schisto_mansoni.Chr_W	29887875	29888171	0.568033	1	1	297	4	4	4	4
Smp_205290	-1.97134	0.536531		0	1	0	168	0	0	0	0	#NUM!	0	0	0	0	1	0	0	Schisto_mansoni.SC_0271	86838	87005	0.727054	1	1	168	0	3	0	3	0	0	0	0	0	1	0.727054	3	Schisto_mansoni.SC_0271	86838	87005	0.5021	1	1	168	2	2	2	2
Smp_178830	-1.96747	0.528405	hypothetical protein	0	1	0	570	0	0	0	0	#NUM!	0	0	0	0	3	0	0	Schisto_mansoni.Chr_1	26418008	26427263	0.0714299	1	1	570	0	1	0	1	0	0	0	0	0	3	0.0714299	0	Schisto_mansoni.Chr_1	26418008	26427263	0.0739937	1	1	570	1	1	1	1
Smp_187390	-1.96747	0.528405		0	1	0	483	0	0	0	0	#NUM!	0	0	0	0	1	0	0	Schisto_mansoni.Chr_4	12535436	12535918	0.0842962	1	1	483	0	1	0	1	0	0	0	0	0	1	0.0842962	0	Schisto_mansoni.Chr_4	12535436	12535918	0.0873218	1	1	483	0	1	0	1
Smp_205690	-1.9566	0.242409		0.154931	1	1	921	2	4	2	4	0.5	0	0	0	0	1	0.154931	0	Schisto_mansoni.SC_0547	213	1133	0.353659	1	1	921	5	8	5	8	0.625	0	0	0	0	1	0.353659	0	Schisto_mansoni.SC_0547	213	1133	0.320559	1	1	921	4	7	4	7
Smp_158270	-1.95656	0.005052		1.74867	1	1	306	23	23	15	15	1	0	0	2	2	2	1.74867	2	Schisto_mansoni.Chr_2.unplaced.SC_0120	243484	246226	1.72972	1	1	306	15	15	13	13	1	0	0	1	1	2	1.72972	3	Schisto_mansoni.Chr_2.unplaced.SC_0120	243484	246226	1.92964	1	1	306	18	18	14	14
Smp_018590	-1.93542	0.49071	GATA binding factor, putative	0.0210087	1	1	1698	12	13	1	1	1	0	0	0	0	7	0.0210087	0	Schisto_mansoni.Chr_3	3370002	3381289	0.215804	1	1	1698	20	20	9	9	1	1	1	4	4	7	0.215804	0	Schisto_mansoni.Chr_3	3370002	3381289	0.0496778	1	1	1698	11	11	2	2
Smp_072190	-1.93526	6.86507e-05	Sm29, putative	505.542	1	1	874	12932	12932	12386	12386	1	7531	7531	119	119	6	505.542	1533	Schisto_mansoni.Chr_1	51486745	51491937	493.006	1	1	874	11053	11053	10583	10583	1	6546	6546	100	100	6	493.006	1311.5	Schisto_mansoni.Chr_1	51486745	51491937	541.007	1	1	874	11625	11625	11211	11211
Smp_202850	-1.9319	0.078711		5.60306	1	1	573	207	215	90	90	1	52	52	29	29	6	5.60306	15	Schisto_mansoni.Chr_5	7983310	7988262	2.62907	1	1	573	81	84	37	37	1	24	24	7	7	6	2.62907	5	Schisto_mansoni.Chr_5	7983310	7988262	4.93162	1	1	573	177	183	67	67
Smp_120020	-1.93162	0.306943	hypothetical protein	4.42269	1	1	1347	143	167	143	167	0.856287	0	0	0	0	1	4.42269	11	Schisto_mansoni.Chr_1.unplaced.SC_0034	2123885	2125231	1.17883	1	1	1347	37	39	37	39	0.948718	0	0	0	0	1	1.17883	3	Schisto_mansoni.Chr_1.unplaced.SC_0034	2123885	2125231	4.85326	1	1	1347	134	155	134	155
Smp_205170	-1.93129	0.129608		1.37203	1	1	156	6	6	6	6	1	0	0	0	0	1	1.37203	5	Schisto_mansoni.SC_0237	51398	51553	1.56596	1	1	156	6	6	6	6	1	0	0	0	0	1	1.56596	5	Schisto_mansoni.SC_0237	51398	51553	2.43325	1	1	156	6	9	6	9
Smp_130420	-1.92919	0.442747	dynein light intermediate chain, putative	0.149259	1	1	1434	35	38	6	6	1	3	3	1	1	10	0.149259	0	Schisto_mansoni.SC_0126	703053	726816	0.0567853	1	1	1434	30	32	2	2	1	1	1	0	0	10	0.0567853	0	Schisto_mansoni.SC_0126	703053	726816	0.0294117	1	1	1434	27	27	1	1
Smp_172430	-1.92335	0.389315	insulinoma-associated protein (ia-1)-related	0.103625	1	1	1377	9	9	4	4	1	0	0	1	1	2	0.103625	0	Schisto_mansoni.Chr_1	28448780	28456355	0.118272	1	1	1377	8	8	4	4	1	0	0	0	0	2	0.118272	0	Schisto_mansoni.Chr_1	28448780	28456355	0.0306292	1	1	1377	7	7	1	1
Smp_190110	-1.92076	0.280488	hypothetical protein	0.806165	1	1	177	4	4	4	4	1	0	0	0	0	1	0.806165	2	Schisto_mansoni.SC_1964	804	980	0.690086	1	1	177	3	3	3	3	1	0	0	0	0	1	0.690086	2	Schisto_mansoni.SC_1964	804	980	0.47657	1	1	177	2	2	2	2
Smp_055740	-1.91861	0.215128	Nanos RNA binding domain, putative	0.37419	1	1	572	36	37	6	6	1	2	2	0	0	4	0.37419	1	Schisto_mansoni.Chr_4	29240546	29256063	0.284721	1	1	572	41	42	4	4	1	1	1	0	0	4	0.284721	0	Schisto_mansoni.Chr_4	29240546	29256063	0.516145	1	1	572	30	32	7	7
Smp_153370	-1.91743	0.524028	hypothetical protein	0.320415	1	0	334	4	4	3	3	1	0	0	3	3	7	0.320415	0	Schisto_mansoni.Chr_5	2394139	2400948	0.121901	1	0	334	5	5	1	1	1	0	0	1	1	7	0.121901	0	Schisto_mansoni.Chr_5	2394139	2400948	0	1	0	334	3	3	0	0
Smp_128030	-1.91384	0.000418206		0.482065	1	1	444	33	34	6	6	1	3	3	3	3	5	0.482065	0	Schisto_mansoni.SC_0097	930850	949746	0.458503	1	1	444	26	26	5	5	1	1	1	4	4	5	0.458503	0	Schisto_mansoni.SC_0097	930850	949746	0.47496	1	1	444	21	21	5	5
Smp_114210	-1.90658	0.282394	hypothetical protein	0.0542965	1	1	657	0	1	0	1	0	0	0	0	0	1	0.0542965	0	Schisto_mansoni.Chr_1.unplaced.SC_0135	638822	639478	0.123942	1	1	657	0	2	0	2	0	0	0	0	0	1	0.123942	0	Schisto_mansoni.Chr_1.unplaced.SC_0135	638822	639478	0.0641955	1	1	657	0	1	0	1
Smp_202380	-1.90282	0.24577		1.7544	1	1	183	9	9	9	9	1	0	0	0	0	1	1.7544	5	Schisto_mansoni.Chr_3.unplaced.SC_0105	827565	827747	1.77989	1	1	183	8	8	8	8	1	0	0	0	0	1	1.77989	5	Schisto_mansoni.Chr_3.unplaced.SC_0105	827565	827747	0.460944	1	1	183	2	2	2	2
Smp_156760	-1.90112	0.158403	hypothetical protein	0.217517	1	1	492	17	18	3	3	1	0	0	0	0	3	0.217517	0	Schisto_mansoni.Chr_1	39315560	39326950	0.496525	1	1	492	12	12	6	6	1	2	2	0	0	3	0.496525	1	Schisto_mansoni.Chr_1	39315560	39326950	0.257173	1	1	492	12	12	3	3
Smp_002350	-1.89848	0.106174	asparagine-rich protein, putative	0.0602989	1	1	2958	10	10	5	5	1	2	2	0	0	5	0.0602989	0	Schisto_mansoni.Chr_2.unplaced.SC_0171	494637	512997	0.0412931	1	1	2958	4	4	3	3	1	0	0	0	0	5	0.0412931	0	Schisto_mansoni.Chr_2.unplaced.SC_0171	494637	512997	0.0285168	1	1	2958	3	3	2	2
Smp_163710	-1.85778	0.00102928	MEG-6	1810.03	1	1	361	21349	21556	18317	18317	1	18176	18176	141	141	14	1810.03	5313	Schisto_mansoni.Chr_W	59221949	59254961	1848.53	1	1	361	19020	19222	16390	16390	1	16269	16269	116	116	14	1848.53	4768	Schisto_mansoni.Chr_W	59221949	59254961	2105.67	1	1	361	20527	20680	18023	18023
Smp_165240	-1.85778	0.0303533	Rac guanyl-nucleotide exchange factor , putative	0.254806	1	1	1960	23	23	14	14	1	1	1	0	0	2	0.254806	0	Schisto_mansoni.Chr_W	24825376	24840577	0.311595	1	1	1960	33	33	15	15	1	1	1	1	1	2	0.311595	1	Schisto_mansoni.Chr_W	24825376	24840577	0.279742	1	1	1960	23	23	13	13
Smp_200510	-1.8524	0.000590611		21.0794	1	1	396	82	234	82	234	0.350427	0	0	0	0	1	21.0794	65	Schisto_mansoni.Chr_1	26173209	26173604	22.1054	1	1	396	79	215	79	215	0.367442	0	0	0	0	1	22.1054	61	Schisto_mansoni.Chr_1	26173209	26173604	24.6029	1	1	396	72	231	72	231
Smp_142070	-1.84779	0.568996		0.0462683	1	1	771	15	17	1	1	1	0	0	0	0	6	0.0462683	0	Schisto_mansoni.Chr_1.unplaced.SC_0094	5449	28880	0	1	0	771	18	18	0	0	#NUM!	0	0	0	0	6	0	0	Schisto_mansoni.Chr_1.unplaced.SC_0094	5449	28880	0.0547035	1	1	771	11	11	1	1
Smp_098240	-1.84779	0.568996		0.349734	1	0	102	286	5629	1	1	1	0	0	1	1	2	0.349734	0	Schisto_mansoni.SC_0230	111021	126698	0	1	0	102	260	5432	0	0	#NUM!	0	0	0	0	2	0	0	Schisto_mansoni.SC_0230	111021	126698	0.413494	1	0	102	221	4822	1	1
Smp_149400	-1.84703	0.00644945	PC3-like endoprotease variant B, putative	1.93119	1	1	1644	451	530	89	89	1	47	47	11	11	11	1.93119	5	Schisto_mansoni.Chr_6	14312329	14348067	1.51072	1	1	1644	372	444	61	61	1	25	25	13	13	11	1.51072	3	Schisto_mansoni.Chr_6	14312329	14348067	1.61625	1	1	1644	400	468	63	63
Smp_185160	-1.84675	0.14856	hypothetical protein	0.400818	1	1	267	0	3	0	3	0	0	2	0	0	2	0.400818	1	Schisto_mansoni.Chr_W	28867087	28867389	0.152491	1	1	267	0	1	0	1	0	0	1	0	0	2	0.152491	0	Schisto_mansoni.Chr_W	28867087	28867389	0.315928	1	1	267	0	2	0	2
Smp_205380	-1.83701	0.167241		0.398261	1	1	627	7	7	7	7	1	0	0	0	0	1	0.398261	1	Schisto_mansoni.SC_0320	24064	24690	0.584426	1	1	627	9	9	9	9	1	0	0	0	0	1	0.584426	1	Schisto_mansoni.SC_0320	24064	24690	0.739937	1	1	627	9	11	9	11
Smp_204600	-1.83466	0.112911		1.41454	1	1	807	79	81	32	32	1	3	3	22	22	9	1.41454	0	Schisto_mansoni.SC_0132	511610	528905	0.655881	1	1	807	56	58	13	13	1	4	4	6	6	9	0.655881	0	Schisto_mansoni.SC_0132	511610	528905	0.993001	1	1	807	73	74	19	19
Smp_076320	-1.82833	0.403122		0.0284472	1	1	1254	1	1	1	1	1	0	0	0	0	1	0.0284472	0	Schisto_mansoni.SC_0138	568740	569993	0.129873	1	1	1254	4	4	4	4	1	0	0	0	0	1	0.129873	0	Schisto_mansoni.SC_0138	568740	569993	0.168168	1	1	1254	5	5	5	5
Smp_127070	-1.82182	0.012618	origin recognition complex subunit, putative	1.74354	1	1	3069	210	215	150	150	1	57	57	9	9	16	1.74354	4	Schisto_mansoni.Chr_6	18336914	18367524	1.84405	1	1	3069	181	181	139	139	1	51	51	0	0	16	1.84405	4	Schisto_mansoni.Chr_6	18336914	18367524	1.30556	1	1	3069	127	134	95	95
Smp_138560	-1.82106	0.292942	hypothetical protein	0.11113	1	0	642	88	88	2	2	1	0	0	2	2	6	0.11113	0	Schisto_mansoni.SC_0256	49631	59262	0.126838	1	1	642	65	65	2	2	1	0	0	1	1	6	0.126838	0	Schisto_mansoni.SC_0256	49631	59262	0.197086	1	0	642	58	58	3	3
Smp_144740	-1.81398	0.0873524	4.1 G protein, putative	0.105541	1	1	2028	51	52	6	6	1	1	1	1	1	9	0.105541	0	Schisto_mansoni.Chr_7.unplaced.SC_0100	543162	571313	0.100382	1	1	2028	48	48	5	5	1	0	0	2	2	9	0.100382	0	Schisto_mansoni.Chr_7.unplaced.SC_0100	543162	571313	0.0623912	1	1	2028	39	39	3	3
Smp_105610	-1.8131	0.580454	hypothetical protein	0.116198	1	1	307	1	1	1	1	1	0	0	0	0	1	0.116198	0	Schisto_mansoni.SC_0163	622786	623092	0.132622	1	1	307	1	1	1	1	1	0	0	0	0	1	0.132622	0	Schisto_mansoni.SC_0163	622786	623092	0	1	0	307	0	0	0	0
Smp_190900	-1.81187	0.714841		0	1	0	417	0	0	0	0	#NUM!	0	0	0	0	1	0	0	Schisto_mansoni.SC_0080	370924	371340	0	1	0	417	0	0	0	0	#NUM!	0	0	0	0	1	0	0	Schisto_mansoni.SC_0080	370924	371340	0.303427	1	1	417	0	3	0	3
Smp_073300	-1.80643	0.00309767	hypothetical protein	16.221	1	1	1601	1079	1109	728	728	1	365	365	13	13	10	16.221	47	Schisto_mansoni.Chr_1	25773364	25792768	15.9707	1	1	1601	909	929	628	628	1	321	321	6	6	10	15.9707	41	Schisto_mansoni.Chr_1	25773364	25792768	19.6261	1	1	1601	1061	1098	745	745
Smp_045640	-1.8037	0.121569	hypothetical protein	2.32245	1	1	768	53	53	50	50	1	2	2	21	21	2	2.32245	5	Schisto_mansoni.Chr_5	3775011	3775931	1.16632	1	1	768	24	24	22	22	1	1	1	5	5	2	1.16632	2	Schisto_mansoni.Chr_5	3775011	3775931	1.31801	1	1	768	27	27	24	24
Smp_139140	-1.80062	0.14537	hypothetical protein	2.65136	1	1	444	67	67	33	33	1	11	11	2	2	3	2.65136	6	Schisto_mansoni.SC_0288	12392	19426	1.46721	1	1	444	23	23	16	16	1	5	5	0	0	3	1.46721	3	Schisto_mansoni.SC_0288	12392	19426	1.2349	1	1	444	24	24	13	13
Smp_011180	-1.79928	0.31035	late embryogenesis abundant protein , putative	0.014292	1	1	2496	2	2	1	1	1	0	0	0	0	9	0.014292	0	Schisto_mansoni.Chr_2	27218092	27232005	0.0326242	1	1	2496	2	2	2	2	1	0	0	0	0	9	0.0326242	0	Schisto_mansoni.Chr_2	27218092	27232005	0.0337952	1	1	2496	2	2	2	2
Smp_159390	-1.79791	0.243816	hypothetical protein	1.25168	1	1	171	6	6	6	6	1	0	0	0	0	1	1.25168	5	Schisto_mansoni.Chr_5.unplaced.SC_0195	470328	470498	2.1429	1	1	171	9	9	9	9	1	0	0	0	0	1	2.1429	8	Schisto_mansoni.Chr_5.unplaced.SC_0195	470328	470498	3.94633	1	1	171	16	16	16	16
Smp_131240	-1.79604	0.151274	transcription factor, putative	1.05363	1	1	237	7	7	7	7	1	0	0	0	0	1	1.05363	3	Schisto_mansoni.SC_0255	1701	1937	1.71793	1	1	237	10	10	10	10	1	0	0	0	0	1	1.71793	5	Schisto_mansoni.SC_0255	1701	1937	1.24572	1	1	237	7	7	7	7
Smp_075720	-1.7937	0.0198205	Leukocyte surface antigen CD53 (Cell surface glycoprotein CD53), putative	1.21513	1	1	822	28	28	28	28	1	19	19	2	2	4	1.21513	3	Schisto_mansoni.Chr_3.unplaced.SC_0105	828601	829524	1.33736	1	1	822	27	27	27	27	1	16	16	0	0	4	1.33736	4	Schisto_mansoni.Chr_3.unplaced.SC_0105	828601	829524	1.59059	1	1	822	31	31	31	31
Smp_158980	-1.79122	0.100998	neuronal calcium sensor, putative	0.230147	1	1	465	4	7	0	3	0	0	0	0	0	3	0.230147	0	Schisto_mansoni.SC_0167	321218	327719	0.350237	1	1	465	11	15	0	4	0	0	0	0	0	3	0.350237	0	Schisto_mansoni.SC_0167	321218	327719	0.362808	1	1	465	4	8	0	4
Smp_141700	-1.79112	0.00280488		5.17229	1	1	2007	317	317	291	291	1	31	31	15	15	6	5.17229	15	Schisto_mansoni.Chr_1	35123940	35131700	5.33535	1	1	2007	295	295	263	263	1	21	21	11	11	6	5.33535	13	Schisto_mansoni.Chr_1	35123940	35131700	4.47612	1	1	2007	231	231	213	213
faa2	-1.78486	0.087355	long-chain-fatty-acid--CoA ligase	0.231642	1	1	1848	160	265	12	12	1	4	4	3	3	15	0.231642	0	Schisto_mansoni.Chr_W	12694952	12718015	0.330479	1	1	1848	133	235	15	15	1	7	7	3	3	15	0.330479	0	Schisto_mansoni.Chr_W	12694952	12718015	0.273873	1	1	1848	129	216	12	12
Smp_151320	-1.78359	0.00646602	TPX2 protein , putative	1.90783	1	1	991	57	57	53	53	1	5	5	1	1	4	1.90783	5	Schisto_mansoni.Chr_W	40830558	40833745	1.84882	1	1	991	49	49	45	45	1	9	9	0	0	4	1.84882	4	Schisto_mansoni.Chr_W	40830558	40833745	2.04285	1	1	991	51	52	47	48
Smp_152170	-1.78092	0.0268301	hypothetical protein	0.507267	1	1	2391	56	56	34	34	1	0	0	10	10	5	0.507267	1	Schisto_mansoni.SC_0363	434	4426	0.578968	1	1	2391	46	46	34	34	1	0	0	15	15	5	0.578968	1	Schisto_mansoni.SC_0363	434	4426	0.476271	1	1	2391	43	43	27	27
Smp_174910	-1.76896	0.00172738	importin alpha-related	24.6932	1	1	2427	1981	1983	1680	1680	1	637	637	151	151	18	24.6932	91	Schisto_mansoni.Chr_W	14744995	14783153	21.406	1	1	2427	1528	1529	1276	1276	1	495	495	120	120	18	21.406	63	Schisto_mansoni.Chr_W	14744995	14783153	25.007	1	1	2427	1670	1671	1439	1439
Smp_069600	-1.76573	0.000388854	hypothetical protein	3.25486	1	1	3551	402	425	324	324	1	48	48	14	14	9	3.25486	8	Schisto_mansoni.Chr_3.unplaced.SC_0077	427508	443664	3.30215	1	1	3551	368	396	288	288	1	45	45	14	14	9	3.30215	8	Schisto_mansoni.Chr_3.unplaced.SC_0077	427508	443664	3.65822	1	1	3551	367	401	308	308
Smp_137520	-1.75727	0.0115646	threonine dehydratase/deaminase, putative	5.51368	1	1	537	131	132	83	83	1	35	35	16	16	5	5.51368	17	Schisto_mansoni.Chr_W.unplaced.SC_0115	600155	610766	7.35449	1	1	537	147	149	97	97	1	46	46	9	9	5	7.35449	20	Schisto_mansoni.Chr_W.unplaced.SC_0115	600155	610766	7.06867	1	1	537	144	146	90	90
Smp_162370	-1.75696	0.111846	Linker histone H1	0.62952	1	1	510	9	9	9	9	1	0	0	0	0	1	0.62952	2	Schisto_mansoni.SC_0144	744584	745093	0.958001	1	1	510	12	12	12	12	1	0	0	0	0	1	0.958001	2	Schisto_mansoni.SC_0144	744584	745093	1.15778	1	1	510	14	14	14	14
Smp_137660	-1.75114	0.000576684	rabkinesin-6, putative	3.1904	1	1	3947	389	396	353	353	1	99	99	19	19	16	3.1904	8	Schisto_mansoni.Chr_2	7973501	7998129	3.08432	1	1	3947	320	328	299	299	1	66	66	16	16	16	3.08432	7	Schisto_mansoni.Chr_2	7973501	7998129	3.43011	1	1	3947	344	351	321	321
Smp_061970	-1.75073	0.00125196	hypothetical protein	14.3663	1	1	1835	791	791	739	739	1	325	325	18	18	6	14.3663	10	Schisto_mansoni.Chr_W	29898330	29902905	13.2241	1	1	1835	645	645	596	596	1	236	236	19	19	6	13.2241	11	Schisto_mansoni.Chr_W	29898330	29902905	12.4346	1	1	1835	569	569	541	541
Smp_100310	-1.74792	0.0929448	hypothetical protein	25.2548	1	1	2325	1355	1710	1293	1646	0.785541	570	614	14	15	6	25.2548	51	Schisto_mansoni.SC_0468	5257	12252	39.8219	1	1	2325	1756	2389	1646	2274	0.723835	667	744	16	16	6	39.8219	91	Schisto_mansoni.SC_0468	5257	12252	28.7525	1	1	2325	1291	1658	1220	1585
Smp_204160	-1.74695	0.00470577		75.2129	1	1	987	2081	2081	2081	2081	1	0	0	0	0	1	75.2129	215	Schisto_mansoni.Chr_W	25035104	25036090	89.8454	1	1	987	2178	2178	2178	2178	1	0	0	0	0	1	89.8454	232	Schisto_mansoni.Chr_W	25035104	25036090	95.4204	1	1	987	2233	2233	2233	2233
Smp_202720	-1.7412	0.303813		0.279787	1	1	255	2	2	2	2	1	0	0	0	0	1	0.279787	1	Schisto_mansoni.Chr_4	19452151	19452405	0.319334	1	1	255	2	2	2	2	1	0	0	0	0	1	0.319334	1	Schisto_mansoni.Chr_4	19452151	19452405	0.165398	1	1	255	1	1	1	1
Smp_042810	-1.73611	0.00184817	chromosome transmission fidelity factor, putative	1.87197	1	1	2706	184	184	142	142	1	60	60	4	4	13	1.87197	5	Schisto_mansoni.Chr_4	12149082	12164641	1.65508	1	1	2706	135	135	110	110	1	58	58	1	1	13	1.65508	4	Schisto_mansoni.Chr_4	12149082	12164641	1.74566	1	1	2706	139	139	112	112
Smp_175240	-1.73475	0.732247		0	1	0	279	7	7	0	0	#NUM!	0	0	0	0	4	0	0	Schisto_mansoni.SC_0662	11081	14466	0	1	0	279	4	4	0	0	#NUM!	0	0	0	0	4	0	0	Schisto_mansoni.SC_0662	11081	14466	0.30234	1	1	279	5	5	2	2
Smp_171970	-1.73465	0.239017	Hypothetical protein, putative	0.266144	1	1	3753	61	61	28	28	1	8	8	5	5	19	0.266144	0	Schisto_mansoni.Chr_W	15867563	15906234	0.271217	1	1	3753	64	64	25	25	1	9	9	2	2	19	0.271217	0	Schisto_mansoni.Chr_W	15867563	15906234	0.224761	1	1	3753	52	53	20	20
Smp_120330	-1.72257	0.35801	hypothetical protein	0.526713	1	1	745	7	11	7	11	0.636364	0	0	0	0	1	0.526713	0	Schisto_mansoni.SC_0251	142335	143079	0.273255	1	1	745	3	5	3	5	0.6	0	0	0	0	1	0.273255	0	Schisto_mansoni.SC_0251	142335	143079	0.169838	1	1	745	2	3	2	3
Smp_073380	-1.72188	0.296983	hypothetical protein	1.11915	1	1	255	17	17	8	8	1	0	0	3	3	2	1.11915	2	Schisto_mansoni.Chr_W	54049377	54054618	0.798334	1	1	255	12	12	5	5	1	0	0	1	1	2	0.798334	2	Schisto_mansoni.Chr_W	54049377	54054618	1.48858	1	1	255	15	15	9	9
Smp_157850	-1.72141	0.556173	hypothetical protein	1.41079	1	1	354	20	39	0	14	0	0	0	0	4	3	1.41079	2	Schisto_mansoni.Chr_W	34029702	34037582	0.230029	1	1	354	24	31	0	2	0	0	0	0	1	3	0.230029	0	Schisto_mansoni.Chr_W	34029702	34037582	0.357427	1	1	354	12	17	0	3
Smp_193570	-1.72093	0.047825	hypothetical protein	2.25518	1	1	348	22	22	22	22	1	0	0	0	0	1	2.25518	7	Schisto_mansoni.SC_0641	1571	1918	1.40397	1	1	348	12	12	12	12	1	0	0	0	0	1	1.40397	3	Schisto_mansoni.SC_0641	1571	1918	1.93915	1	1	348	16	16	16	16
Smp_200910	-1.71718	0.18073		5.21064	1	1	267	39	39	39	39	1	0	0	0	0	1	5.21064	16	Schisto_mansoni.Chr_1	29060888	29061154	2.28736	1	1	267	15	15	15	15	1	0	0	0	0	1	2.28736	6	Schisto_mansoni.Chr_1	29060888	29061154	6.1606	1	1	267	39	39	39	39
Smp_143620	-1.70567	0.286507	hypothetical protein	0.118044	1	1	4533	91	97	15	15	1	7	7	1	1	20	0.118044	0	Schisto_mansoni.Chr_2	28567070	28635045	0.0988011	1	1	4533	65	66	11	11	1	4	4	0	0	20	0.0988011	0	Schisto_mansoni.Chr_2	28567070	28635045	0.0465215	1	1	4533	52	53	5	5
Smp_205350	-1.7047	0.620244		0	1	0	345	0	0	0	0	#NUM!	0	0	0	0	1	0	0	Schisto_mansoni.SC_0300	1011	1355	0.118015	1	1	345	1	1	1	1	1	0	0	0	0	1	0.118015	0	Schisto_mansoni.SC_0300	1011	1355	0.12225	1	1	345	1	1	1	1
Smp_077690	-1.7044	0.515656		0.114153	1	1	625	2	2	2	2	1	0	0	0	0	1	0.114153	0	Schisto_mansoni.Chr_6	19401410	19402034	0.390864	1	1	625	6	6	6	6	1	0	0	0	0	1	0.390864	1	Schisto_mansoni.Chr_6	19401410	19402034	0.0674823	1	1	625	1	1	1	1
Smp_200410	-1.70295	0.00240031		12.4518	1	1	954	426	437	333	333	1	220	220	6	6	7	12.4518	36	Schisto_mansoni.Chr_1	18592289	18610448	13.4436	1	1	954	394	402	315	315	1	193	193	7	7	7	13.4436	34	Schisto_mansoni.Chr_1	18592289	18610448	13.4399	1	1	954	368	380	304	304
Smp_125850	-1.69948	0.00468439		1.74589	1	1	756	37	37	37	37	1	0	0	0	0	1	1.74589	5	Schisto_mansoni.Chr_1	24076704	24077459	1.72339	1	1	756	32	32	32	32	1	0	0	0	0	1	1.72339	4	Schisto_mansoni.Chr_1	24076704	24077459	1.89682	1	1	756	34	34	34	34
Smp_155490	-1.69858	0.000204865	hypothetical protein	30.6442	1	1	1887	1820	1864	1621	1621	1	395	395	55	55	8	30.6442	86	Schisto_mansoni.Chr_W	29863144	29887809	32.3002	1	1	1887	1642	1675	1497	1497	1	336	336	42	42	8	32.3002	81	Schisto_mansoni.Chr_W	29863144	29887809	33.4595	1	1	1887	1644	1677	1497	1497
Smp_000380	-1.69342	0.742188	hypothetical protein	0.15646	1	1	456	2	2	2	2	1	0	0	0	0	1	0.15646	0	Schisto_mansoni.SC_0113	877491	877946	0	1	0	456	0	0	0	0	#NUM!	0	0	0	0	1	0	0	Schisto_mansoni.SC_0113	877491	877946	0	1	0	456	0	0	0	0
Smp_124340	-1.69172	0.142349	hypothetical protein	0.13791	1	1	2328	147	237	9	9	1	2	2	2	2	14	0.13791	0	Schisto_mansoni.Chr_1	5701108	5730841	0.279828	1	1	2328	179	295	16	16	1	7	7	2	2	14	0.279828	0	Schisto_mansoni.Chr_1	5701108	5730841	0.271755	1	1	2328	163	265	15	15
Smp_206140	-1.68824	0.00424238		9.10171	1	1	243	54	62	54	62	0.870968	0	0	0	0	1	9.10171	7	Schisto_mansoni.SC_1432	4004	4246	8.54513	1	1	243	46	51	46	51	0.901961	0	0	0	0	1	8.54513	12	Schisto_mansoni.SC_1432	4004	4246	10.5875	1	1	243	49	61	49	61
Smp_148080	-1.68485	0.000200906	hypothetical protein	102.949	1	1	710	2254	2254	2049	2049	1	1068	1068	58	58	4	102.949	338.5	Schisto_mansoni.Chr_1	46994961	46998982	104.311	1	1	710	1999	1999	1819	1819	1	921	921	34	34	4	104.311	293.5	Schisto_mansoni.Chr_1	46994961	46998982	107.104	1	1	710	1978	1978	1803	1803
Smp_169930	-1.67289	0.175693	hypothetical protein	0.171976	1	1	1452	328	423	7	7	1	4	4	0	0	13	0.171976	0	Schisto_mansoni.Chr_6	5017298	5041660	0.168244	1	1	1452	258	338	6	6	1	4	4	2	2	13	0.168244	0	Schisto_mansoni.Chr_6	5017298	5041660	0.174283	1	1	1452	247	332	6	6
Smp_177750	-1.67041	0.563213		0.138267	1	1	516	0	2	0	2	0	0	0	0	0	1	0.138267	0	Schisto_mansoni.SC_0125	207723	208238	0	1	0	516	0	0	0	0	#NUM!	0	0	0	0	1	0	0	Schisto_mansoni.SC_0125	207723	208238	0.245212	1	1	516	1	3	1	3
Smp_157880	-1.66223	0.351709	hypothetical protein	0.252999	1	1	1551	15	15	11	11	1	1	1	3	3	8	0.252999	0	Schisto_mansoni.Chr_W	33772893	33783801	0.210007	1	1	1551	13	13	8	8	1	1	1	1	1	8	0.210007	0	Schisto_mansoni.Chr_W	33772893	33783801	0.598247	1	1	1551	26	26	22	22
Smp_196950	-1.6581	0.193583	one cut domain family member, putative	0.181623	1	1	3339	22	22	17	17	1	1	1	0	0	7	0.181623	0	Schisto_mansoni.Chr_1	20945463	20987405	0.109744	1	1	3339	16	16	9	9	1	0	0	0	0	7	0.109744	0	Schisto_mansoni.Chr_1	20945463	20987405	0.151577	1	1	3339	17	17	12	12
Smp_176710	-1.65737	0.0153689	transcriptional factor nfil3/e4bp4, putative	2.33891	1	1	3996	311	311	262	262	1	12	12	0	0	2	2.33891	6	Schisto_mansoni.Chr_6	4812160	4840401	1.82382	1	1	3996	220	221	179	179	1	6	6	0	0	2	1.82382	4	Schisto_mansoni.Chr_6	4812160	4840401	1.83651	1	1	3996	201	201	174	174
Smp_135050	-1.64574	0.344111		0.169871	1	1	420	20	21	2	2	1	1	1	1	1	4	0.169871	0	Schisto_mansoni.Chr_2	24846275	24855030	0.193881	1	1	420	19	19	2	2	1	2	2	0	0	4	0.193881	0	Schisto_mansoni.Chr_2	24846275	24855030	0.10042	1	1	420	12	12	1	1
Smp_088610	-1.64436	0.211174	hypothetical protein	0.446309	1	1	1119	14	14	14	14	1	0	0	0	0	1	0.446309	0	Schisto_mansoni.Chr_2	1242650	1243768	0.691319	1	1	1119	19	19	19	19	1	0	0	0	0	1	0.691319	0	Schisto_mansoni.Chr_2	1242650	1243768	0.716132	1	1	1119	18	19	18	19
Smp_125040	-1.64127	0.00857363	Epa2p-like protein	4.63442	1	1	2340	317	317	304	304	1	129	129	12	12	10	4.63442	12	Schisto_mansoni.SC_0151	408659	425266	5.28948	1	1	2340	313	313	304	304	1	107	107	7	7	10	5.28948	13	Schisto_mansoni.SC_0151	408659	425266	4.75837	1	1	2340	279	279	264	264
Smp_159080	-1.63782	0.590803	hypothetical protein	0.165152	1	0	216	6	6	1	1	1	0	0	1	1	2	0.165152	0	Schisto_mansoni.Chr_W	25045062	25046886	0.376991	1	0	216	9	9	2	2	1	0	0	2	2	2	0.376991	0	Schisto_mansoni.Chr_W	25045062	25046886	0.195261	1	0	216	7	7	1	1
Smp_198590	-1.63735	0.424536	kif1, putative	0.0298019	1	1	2394	9	9	2	2	1	1	1	0	0	17	0.0298019	0	Schisto_mansoni.Chr_W	9456854	9489422	0.0680285	1	1	2394	10	10	4	4	1	1	1	0	0	17	0.0680285	0	Schisto_mansoni.Chr_W	9456854	9489422	0.0880878	1	1	2394	10	10	5	5
Smp_132660	-1.63478	0.348054	guanine-nucleotide-exchange-factor, putative	0.0423919	1	1	1683	11	12	2	2	1	0	0	1	1	9	0.0423919	0	Schisto_mansoni.Chr_1.unplaced.SC_0010	2072691	2097483	0.169344	1	1	1683	15	15	7	7	1	3	3	1	1	9	0.169344	0	Schisto_mansoni.Chr_1.unplaced.SC_0010	2072691	2097483	0.100241	1	1	1683	10	10	4	4
Smp_054840	-1.63143	0.00286451	DNA replication licensing factor MCM2, putative	17.4246	1	1	1386	677	684	671	677	0.991137	275	275	73	73	7	17.4246	28	Schisto_mansoni.Chr_1	42870012	42881400	16.0686	1	1	1386	549	556	541	547	0.989031	190	190	67	67	7	16.0686	20	Schisto_mansoni.Chr_1	42870012	42881400	16.7975	1	1	1386	547	559	542	552
Smp_167320	-1.62994	0.00796693	serine-threonine rich antigen , putative	4.11245	1	1	2637	368	368	304	304	1	22	22	24	24	4	4.11245	11	Schisto_mansoni.SC_0013	1826149	1855780	3.33502	1	1	2637	265	265	216	216	1	17	17	13	13	4	3.33502	8	Schisto_mansoni.SC_0013	1826149	1855780	3.69464	1	1	2637	267	267	231	231
Smp_161340	-1.62864	0.0458443	hypothetical protein	0.843329	1	1	423	34	34	10	10	1	6	6	0	0	4	0.843329	1	Schisto_mansoni.Chr_1	51496155	51501436	0.770025	1	1	423	23	23	8	8	1	2	2	2	2	4	0.770025	1	Schisto_mansoni.Chr_1	51496155	51501436	0.997078	1	1	423	22	22	10	10
Smp_192880	-1.62709	0.400247		0.0843329	1	1	846	0	2	0	2	0	0	0	0	0	1	0.0843329	0	Schisto_mansoni.Chr_1	23270317	23271162	0.625645	1	1	846	0	13	0	13	0	0	0	0	0	1	0.625645	0	Schisto_mansoni.Chr_1	23270317	23271162	0.498539	1	1	846	0	10	0	10
Smp_133890	-1.62691	0.35647		0.406528	1	1	351	701	908	1	4	0.25	0	3	0	0	3	0.406528	1	Schisto_mansoni.Chr_W	460666	478063	0.115997	1	1	351	632	848	0	1	0	0	1	0	0	3	0.115997	0	Schisto_mansoni.Chr_W	460666	478063	0.480643	1	1	351	668	878	0	4
Smp_158360	-1.61944	0.105972	hypothetical protein	1.04612	1	1	1023	30	30	30	30	1	0	0	0	0	1	1.04612	3	Schisto_mansoni.Chr_4	9541074	9542096	0.955192	1	1	1023	24	24	24	24	1	0	0	0	0	1	0.955192	2	Schisto_mansoni.Chr_4	9541074	9542096	0.659651	1	1	1023	16	16	16	16
Smp_173610	-1.61507	0.000328142		19.9537	1	1	1112	896	896	622	622	1	64	64	7	7	2	19.9537	61	Schisto_mansoni.Chr_1	30752682	30760359	21.2729	1	1	1112	845	845	581	581	1	42	42	7	7	2	21.2729	55	Schisto_mansoni.Chr_1	30752682	30760359	22.0364	1	1	1112	782	782	581	581
Smp_089860	-1.61434	0.0758499	histone H3, putative	3.21515	1	1	466	42	42	42	42	1	0	0	0	0	1	3.21515	9	Schisto_mansoni.Chr_2	22798575	22799040	3.058	1	1	466	35	35	35	35	1	0	0	0	0	1	3.058	8	Schisto_mansoni.Chr_2	22798575	22799040	4.70638	1	1	466	52	52	52	52
Smp_137360	-1.61316	0.203429	hypothetical protein	0.463953	1	1	692	10	10	9	9	1	2	2	0	0	2	0.463953	1	Schisto_mansoni.Chr_1.unplaced.SC_0010	9400	14416	0.647204	1	1	692	11	11	11	11	1	2	2	0	0	2	0.647204	1	Schisto_mansoni.Chr_1.unplaced.SC_0010	9400	14416	1.03613	1	1	692	19	19	17	17
Smp_181870	-1.61205	0.0109613	DNA replication licensing factor MCM8, putative	0.349338	1	1	2655	95	97	26	26	1	3	3	5	5	14	0.349338	1	Schisto_mansoni.SC_0041	1263641	1296012	0.398716	1	1	2655	83	86	26	26	1	6	6	3	3	14	0.398716	0	Schisto_mansoni.SC_0041	1263641	1296012	0.349484	1	1	2655	69	72	22	22
Smp_198040	-1.60606	0.160314	hypothetical protein	0.219815	1	1	1136	0	7	0	7	0	0	0	0	0	1	0.219815	0	Schisto_mansoni.Chr_4	15966004	15967139	0.430089	1	1	1136	0	12	0	12	0	0	0	0	0	1	0.430089	0	Schisto_mansoni.Chr_4	15966004	15967139	0.297017	1	1	1136	0	8	0	8
Smp_125470	-1.60469	0.674556		0.174867	1	1	408	2	2	2	2	1	0	0	1	1	2	0.174867	0	Schisto_mansoni.Chr_2	28091969	28092421	0.0997918	1	1	408	1	1	1	1	1	0	0	0	0	2	0.0997918	0	Schisto_mansoni.Chr_2	28091969	28092421	0	1	0	408	0	0	0	0
Smp_173090	-1.601	0.664617	eyes absent homolog, putative	0.0639298	1	0	558	25	25	1	1	1	0	0	1	1	6	0.0639298	0	Schisto_mansoni.Chr_W	7961373	7979632	0	1	0	558	28	28	0	0	#NUM!	0	0	0	0	6	0	0	Schisto_mansoni.Chr_W	7961373	7979632	0.075585	1	1	558	25	25	1	1
Smp_158710	-1.601	0.664617		0.0555651	1	1	642	4	4	1	1	1	0	0	0	0	3	0.0555651	0	Schisto_mansoni.SC_0142	66049	71924	0	1	0	642	2	2	0	0	#NUM!	0	0	0	0	3	0	0	Schisto_mansoni.SC_0142	66049	71924	0.0656954	1	1	642	4	4	1	1
Smp_138060	-1.601	0.664617	MEG-3 (Grail) family	0.0495456	1	0	720	4	4	1	1	1	0	0	1	1	18	0.0495456	0	Schisto_mansoni.SC_0163	92674	107152	0	1	0	720	1	1	0	0	#NUM!	0	0	0	0	18	0	0	Schisto_mansoni.SC_0163	92674	107152	0.0585784	1	1	720	1	1	1	1
Smp_166950	-1.60076	0.395006		0.066368	1	1	3225	4	6	4	6	0.666667	0	0	0	0	2	0.066368	0	Schisto_mansoni.Chr_2	16631702	16634929	0.0378745	1	1	3225	3	3	3	3	1	0	0	0	0	2	0.0378745	0	Schisto_mansoni.Chr_2	16631702	16634929	0.0523118	1	1	3225	2	4	2	4
Smp_116270	-1.60067	0.613103	Hypothetical protein, putative	0	1	0	99	0	0	0	0	#NUM!	0	0	0	0	1	0	0	Schisto_mansoni.Chr_W	7112976	7113074	1.64505	1	1	99	4	4	4	4	1	0	0	0	0	1	1.64505	4	Schisto_mansoni.Chr_W	7112976	7113074	1.27807	1	1	99	3	3	3	3
Smp_146160	-1.59975	0.00189009		3.81858	1	1	5082	884	933	544	544	1	162	162	17	17	14	3.81858	6	Schisto_mansoni.Chr_W	13960161	14005297	4.10996	1	1	5082	888	963	513	513	1	144	144	23	23	14	4.10996	6	Schisto_mansoni.Chr_W	13960161	14005297	3.75953	1	1	5082	804	877	453	453
Smp_195070	-1.59773	0.0264434		0.684918	1	1	625	14	14	12	12	1	10	10	0	0	7	0.684918	1	Schisto_mansoni.Chr_W	45648511	45656473	0.586297	1	1	625	12	12	9	9	1	8	8	0	0	7	0.586297	1	Schisto_mansoni.Chr_W	45648511	45656473	0.674823	1	1	625	11	11	10	10
Smp_168790	-1.59659	0.0178609	hypothetical protein	0.767157	1	1	279	20	20	6	6	1	0	0	3	3	3	0.767157	2	Schisto_mansoni.Chr_3	14544777	14546281	0.875592	1	0	279	17	17	6	6	1	0	0	6	6	3	0.875592	0	Schisto_mansoni.Chr_3	14544777	14546281	0.75585	1	1	279	23	23	5	5
Smp_095500	-1.59561	0.0405861	dynein light chain, putative	4.70411	1	1	273	36	36	36	36	1	29	29	0	0	2	4.70411	7	Schisto_mansoni.Chr_1	44139079	44139389	3.28107	1	1	273	22	22	22	22	1	14	14	0	0	2	3.28107	8	Schisto_mansoni.Chr_1	44139079	44139389	4.0168	1	1	273	26	26	26	26
Smp_055500	-1.59112	0.13901	DNA polymerase I, putative	0.960138	1	1	1449	156	238	39	39	1	19	19	7	7	9	0.960138	2	Schisto_mansoni.Chr_W	29794119	29817153	0.618172	1	1	1449	136	205	22	22	1	6	6	7	7	9	0.618172	1	Schisto_mansoni.Chr_W	29794119	29817153	0.582145	1	1	1449	112	164	20	20
Smp_152070	-1.58919	0.0715056		0.473533	1	1	678	5	14	0	9	0	0	0	0	0	2	0.473533	1	Schisto_mansoni.Chr_2	5224593	5228375	0.480414	1	1	678	5	11	2	8	0.25	0	0	0	0	2	0.480414	1	Schisto_mansoni.Chr_2	5224593	5228375	0.684278	1	1	678	5	12	4	11
Smp_165230	-1.58574	0.1224	polycystin 1-related	0.190991	1	1	10086	76	88	54	54	1	16	16	2	2	40	0.190991	0	Schisto_mansoni.Chr_W	24719707	24802508	0.347164	1	1	10086	106	121	86	86	1	34	34	0	0	40	0.347164	0	Schisto_mansoni.Chr_W	24719707	24802508	0.296899	1	1	10086	94	110	71	71
Smp_200490	-1.58499	0.389163		1.08099	1	1	198	6	6	6	6	1	0	0	0	0	1	1.08099	3	Schisto_mansoni.Chr_1	20414522	20414719	1.23379	1	1	198	6	6	6	6	1	0	0	0	0	1	1.23379	4	Schisto_mansoni.Chr_1	20414522	20414719	0.426024	1	1	198	2	2	2	2
Smp_018930	-1.58472	0.00491375	hypothetical protein	9.06844	1	1	653	198	199	166	166	1	23	23	0	0	2	9.06844	28	Schisto_mansoni.Chr_3	24073631	24077403	9.41496	1	1	653	184	189	151	151	1	13	13	0	0	2	9.41496	22	Schisto_mansoni.Chr_3	24073631	24077403	10.9155	1	1	653	193	196	169	169
Smp_121240	-1.58464	0.25679	hypothetical protein	0.570414	1	1	813	14	14	13	13	1	0	0	2	2	4	0.570414	0	Schisto_mansoni.Chr_7	8207082	8209651	1.5024	1	1	813	33	33	30	30	1	0	0	7	7	4	1.5024	0	Schisto_mansoni.Chr_7	8207082	8209651	1.50445	1	1	813	30	30	29	29
Smp_158440	-1.58373	0.000145153		21.4577	1	1	660	462	462	397	397	1	49	49	118	118	4	21.4577	55	Schisto_mansoni.Chr_1	826594	829863	22.64	1	1	660	423	423	367	367	1	47	47	125	125	4	22.64	48	Schisto_mansoni.Chr_1	826594	829863	22.6219	1	1	660	395	395	354	354
Smp_156750	-1.57572	2.25205e-05		1.27192	1	1	2412	137	137	86	86	1	22	22	6	6	10	1.27192	3	Schisto_mansoni.Chr_1	39336833	39358719	1.31666	1	1	2412	115	115	78	78	1	21	21	7	7	10	1.31666	3	Schisto_mansoni.Chr_1	39336833	39358719	1.29397	1	1	2412	108	108	74	74
Smp_177670	-1.57095	0.677424	placental protein 11 related	0.152448	1	1	234	0	1	0	1	0	0	0	0	0	1	0.152448	0	Schisto_mansoni.SC_0049	1780442	1780675	0.173996	1	1	234	0	1	0	1	0	0	0	0	0	1	0.173996	0	Schisto_mansoni.SC_0049	1780442	1780675	0	1	0	234	0	0	0	0
Smp_202540	-1.57095	0.677424		0.174867	1	0	204	1	1	1	1	1	0	0	1	1	2	0.174867	0	Schisto_mansoni.Chr_4	17254751	17255115	0.199584	1	0	204	1	1	1	1	1	0	0	1	1	2	0.199584	0	Schisto_mansoni.Chr_4	17254751	17255115	0	1	0	204	0	0	0	0
Smp_160680	-1.57091	0.0645026	hypothetical protein	3.17042	1	1	4827	548	548	429	429	1	112	112	8	8	18	3.17042	7	Schisto_mansoni.Chr_4	16153452	16183591	2.27741	1	1	4827	363	365	270	270	1	63	63	6	6	18	2.27741	5	Schisto_mansoni.Chr_4	16153452	16183591	3.00574	1	1	4827	454	456	344	344
Smp_051810	-1.56936	0.000571788	elongation of fatty acids protein 1	83.4877	1	1	805	1993	1994	1884	1884	1	535	535	112	112	4	83.4877	260	Schisto_mansoni.Chr_4	3780461	3788191	76.2206	1	1	805	1602	1602	1507	1507	1	419	419	75	75	4	76.2206	211	Schisto_mansoni.Chr_4	3780461	3788191	78.4848	1	1	805	1588	1588	1498	1498
Smp_179700	-1.56467	0.0157204	hypothetical protein	4.83069	1	1	192	43	44	26	26	1	26	26	0	0	2	4.83069	14	Schisto_mansoni.Chr_3	6656915	6668234	4.24115	1	1	192	34	34	20	20	1	19	19	1	1	2	4.24115	10	Schisto_mansoni.Chr_3	6656915	6668234	3.95404	1	1	192	26	26	18	18
Smp_134490	-1.56289	0.156263	thyroid hormone receptor, putative	0.0188346	1	1	3788	47	49	2	2	1	1	1	0	0	7	0.0188346	0	Schisto_mansoni.Chr_7	7332976	7369504	0.0107484	1	1	3788	43	43	1	1	1	0	0	0	0	7	0.0107484	0	Schisto_mansoni.Chr_7	7332976	7369504	0.0222684	1	1	3788	35	35	2	2
Smp_190210	-1.56121	0.504372		0.516997	1	1	207	0	3	0	3	0	0	0	0	0	1	0.516997	1	Schisto_mansoni.SC_0176	6257	6463	0.590073	1	1	207	0	3	0	3	0	0	0	0	0	1	0.590073	1	Schisto_mansoni.SC_0176	6257	6463	1.42626	1	1	207	0	7	0	7
Smp_185440	-1.55975	0.0764727	hypothetical protein	0.156144	1	1	2970	13	13	13	13	1	0	0	0	0	1	0.156144	0	Schisto_mansoni.Chr_W	56743947	56746916	0.191923	1	1	2970	14	14	14	14	1	0	0	0	0	1	0.191923	0	Schisto_mansoni.Chr_W	56743947	56746916	0.227213	1	1	2970	15	16	15	16
Smp_184420	-1.55599	0.167145		0.223304	1	1	639	4	4	4	4	1	0	0	0	0	1	0.223304	0	Schisto_mansoni.Chr_W	3693841	3694479	0.382301	1	1	639	6	6	6	6	1	0	0	0	0	1	0.382301	0	Schisto_mansoni.Chr_W	3693841	3694479	0.330019	1	1	639	5	5	5	5
Smp_141480	-1.553	0.279846	hypothetical protein	7.01261	1	1	468	203	268	92	92	1	0	0	0	0	2	7.01261	18	Schisto_mansoni.Chr_1	41388621	41398216	6.52485	1	1	468	183	242	75	75	1	0	0	0	0	2	6.52485	14	Schisto_mansoni.Chr_1	41388621	41398216	13.6983	1	1	468	242	298	152	152
Smp_008450	-1.55263	0.0597363	leucine-rich repeat-containing protein, putative	0.219694	1	1	2598	17	17	16	16	1	1	1	0	0	3	0.219694	1	Schisto_mansoni.Chr_1	31263266	31269014	0.141045	1	1	2598	14	14	9	9	1	1	1	1	1	3	0.141045	0	Schisto_mansoni.Chr_1	31263266	31269014	0.211044	1	1	2598	13	13	13	13
Smp_093780	-1.55241	0.0239811	peroxiredoxins, prx-1, prx-2, prx-3, putative	7.87775	1	1	240	190	190	53	53	1	19	19	6	6	2	7.87775	24.5	Schisto_mansoni.Chr_3.unplaced.SC_0192	96067	100539	9.66982	1	1	240	167	167	57	57	1	17	17	1	1	2	9.66982	23	Schisto_mansoni.Chr_3.unplaced.SC_0192	96067	100539	8.43528	1	1	240	151	151	48	48
Smp_027290	-1.5513	0.498107		0.0861662	1	1	828	3	3	2	2	1	1	1	1	1	3	0.0861662	0	Schisto_mansoni.Chr_4	26337681	26339314	0.295037	1	1	828	9	9	6	6	1	0	0	4	4	3	0.295037	0	Schisto_mansoni.Chr_4	26337681	26339314	0.101875	1	1	828	5	5	2	2
Smp_164950	-1.55091	0.0145199		10.0127	1	1	823	268	268	231	231	1	90	90	12	12	5	10.0127	28	Schisto_mansoni.Chr_1	10721227	10725526	11.6258	1	1	823	274	274	235	235	1	86	86	9	9	5	11.6258	31	Schisto_mansoni.Chr_1	10721227	10725526	10.9669	1	1	823	247	247	214	214
Smp_204690	-1.54984	0.185896		0.900829	1	1	198	5	5	5	5	1	0	0	0	0	1	0.900829	2	Schisto_mansoni.SC_0142	744492	744689	1.43942	1	1	198	7	7	7	7	1	0	0	0	0	1	1.43942	3	Schisto_mansoni.SC_0142	744492	744689	1.7041	1	1	198	6	8	6	8
Smp_117920	-1.54869	0.00797537	steroid dehydrogenase, putative	3.64656	1	1	225	23	23	23	23	1	0	0	0	0	1	3.64656	6	Schisto_mansoni.Chr_3.unplaced.SC_0083	641276	641500	4.34294	1	1	225	24	24	24	24	1	0	0	0	0	1	4.34294	5	Schisto_mansoni.Chr_3.unplaced.SC_0083	641276	641500	4.31137	1	1	225	23	23	23	23
Smp_114970	-1.54836	0.568259		0.61932	1	1	288	4	5	4	5	0.8	4	4	0	0	2	0.61932	1	Schisto_mansoni.Chr_4	30070351	30071779	0.141372	1	1	288	1	1	1	1	1	1	1	0	0	2	0.141372	0	Schisto_mansoni.Chr_4	30070351	30071779	0.439338	1	1	288	3	3	3	3
Smp_204340	-1.54592	0.461559		1.01922	1	1	210	6	6	6	6	1	0	0	0	0	1	1.01922	2.5	Schisto_mansoni.Chr_W	4117311	4117520	0.387762	1	1	210	2	2	2	2	1	0	0	0	0	1	0.387762	1	Schisto_mansoni.Chr_W	4117311	4117520	0.80336	1	1	210	4	4	4	4
Smp_075380	-1.54245	0.220302	hypothetical protein	0.133606	1	1	1068	4	4	4	4	1	0	0	0	0	1	0.133606	0	Schisto_mansoni.Chr_W.unplaced.SC_0185	275067	276134	0.152491	1	1	1068	4	4	4	4	1	0	0	0	0	1	0.152491	0	Schisto_mansoni.Chr_W.unplaced.SC_0185	275067	276134	0.157964	1	1	1068	4	4	4	4
Smp_043910	-1.54141	0.0535574	tubulin tyrosine ligase-related	1.56804	1	1	273	680	1329	12	12	1	0	0	7	7	2	1.56804	2	Schisto_mansoni.SC_0194	61127	81270	1.19311	1	1	273	659	1317	8	8	1	0	0	2	2	2	1.19311	2	Schisto_mansoni.SC_0194	61127	81270	1.85391	1	1	273	572	1050	12	12
Smp_205090	-1.5414	0.292123		0.75498	1	1	189	2	4	2	4	0.5	0	0	0	0	1	0.75498	2	Schisto_mansoni.SC_0221	317678	317866	1.72339	1	1	189	7	8	7	8	0.875	0	0	0	0	1	1.72339	4	Schisto_mansoni.SC_0221	317678	317866	1.33893	1	1	189	3	6	3	6
Smp_090520	-1.53878	0.00777044	purine nucleoside phosphorylase	37.471	1	1	1230	1587	1610	1292	1292	1	657	657	48	48	8	37.471	119	Schisto_mansoni.Chr_W	5402071	5427095	31.0163	1	1	1230	1156	1179	937	937	1	495	495	18	18	8	31.0163	89	Schisto_mansoni.Chr_W	5402071	5427095	33.6383	1	1	1230	1201	1231	981	981
Smp_181900	-1.53639	0.0102418	hypothetical protein	12.3864	1	1	144	50	50	50	50	1	0	0	0	0	1	12.3864	37	Schisto_mansoni.Chr_W	16933384	16933527	12.7235	1	1	144	45	45	45	45	1	0	0	0	0	1	12.7235	30	Schisto_mansoni.Chr_W	16933384	16933527	13.473	1	1	144	46	46	46	46
Smp_180620	-1.53339	0.00124439	hypothetical protein	111.768	1	1	338	1736	1745	1053	1059	0.994334	795	795	179	185	10	111.768	305.5	Schisto_mansoni.Chr_2.unplaced.SC_0108	1141680	1146941	107.329	1	1	338	1345	1348	890	891	0.998878	748	748	91	92	10	107.329	279	Schisto_mansoni.Chr_2.unplaced.SC_0108	1141680	1146941	104.817	1	1	338	1286	1289	840	840
Smp_186630	-1.53335	0.357734	hypothetical protein	0.285383	1	1	375	3	3	3	3	1	0	0	0	0	3	0.285383	0	Schisto_mansoni.SC_0333	20769	25377	0.32572	1	1	375	5	5	3	3	1	0	0	0	0	3	0.32572	1	Schisto_mansoni.SC_0333	20769	25377	0.562352	1	1	375	5	5	5	5
Smp_129010	-1.53257	0.00575829	hypothetical protein	24.9491	1	1	1304	1031	1034	912	912	1	202	202	3	3	4	24.9491	79	Schisto_mansoni.Chr_1	22333482	22359536	20.701	1	1	1304	762	762	663	663	1	148	148	1	1	4	20.701	56	Schisto_mansoni.Chr_1	22333482	22359536	23.5463	1	1	1304	802	802	728	728
Smp_126070	-1.5318	0.158052		0.479473	1	1	744	16	16	10	10	1	3	3	0	0	6	0.479473	1	Schisto_mansoni.Chr_1	30312232	30327572	0.547245	1	1	744	12	12	10	10	1	4	4	0	0	6	0.547245	1	Schisto_mansoni.Chr_1	30312232	30327572	0.396821	1	1	744	16	17	7	7
Smp_110560	-1.5299	0.206569	hypothetical protein	1.17746	1	1	818	27	27	27	27	1	0	0	0	0	1	1.17746	0	Schisto_mansoni.SC_0247	185427	186244	1.09503	1	1	818	22	22	22	22	1	0	0	0	0	1	1.09503	1	Schisto_mansoni.SC_0247	185427	186244	1.44369	1	1	818	28	28	28	28
Smp_145920	-1.52864	0.00104124	protein-tyrosine sulfotransferase, putative	31.4642	1	1	534	502	504	469	471	0.995754	109	109	10	10	3	31.4642	97	Schisto_mansoni.Chr_3	9460516	9465077	29.5832	1	1	534	411	413	386	388	0.994845	95	95	2	2	3	29.5832	80	Schisto_mansoni.Chr_3	9460516	9465077	28.4335	1	1	534	382	382	360	360
Smp_194540	-1.52682	0.291914	hypothetical protein	2.34469	1	1	852	135	156	56	56	1	19	19	2	2	4	2.34469	6	Schisto_mansoni.Chr_2	5814525	5827163	1.1469	1	1	852	60	68	24	24	1	9	9	1	1	4	1.1469	2	Schisto_mansoni.Chr_2	5814525	5827163	1.58409	1	1	852	83	99	32	32
Smp_176870	-1.52608	0.274918	cd63 antigen-like	0.19929	1	1	1074	18	19	6	6	1	5	5	0	0	8	0.19929	0	Schisto_mansoni.Chr_3.unplaced.SC_0105	26600	43223	0.379097	1	1	1074	20	20	10	10	1	5	5	0	0	8	0.379097	1	Schisto_mansoni.Chr_3.unplaced.SC_0105	26600	43223	0.353434	1	1	1074	19	19	9	9
Smp_193740	-1.52549	0.287247		0.580046	1	1	246	0	4	0	4	0	0	0	0	0	1	0.580046	1	Schisto_mansoni.SC_0247	199818	200063	1.15856	1	1	246	0	7	0	7	0	0	0	0	0	1	1.15856	3	Schisto_mansoni.SC_0247	199818	200063	0.514347	1	1	246	0	3	0	3
Smp_205320	-1.52428	0.333446		5.58685	1	1	945	137	148	137	148	0.925676	0	0	0	0	1	5.58685	17	Schisto_mansoni.SC_0283	1570	2514	10.2542	1	1	945	228	238	228	238	0.957983	0	0	0	0	1	10.2542	27	Schisto_mansoni.SC_0283	1570	2514	4.99869	1	1	945	101	112	101	112
Smp_210620	-1.52277	0.540885	histone H2A, putative	0.241033	1	1	444	3	3	3	3	1	2	2	0	0	3	0.241033	1	Schisto_mansoni.Chr_6	12990045	12991190	0	1	0	444	0	0	0	0	#NUM!	0	0	0	0	3	0	0	Schisto_mansoni.Chr_6	12990045	12991190	0.189984	1	1	444	2	2	2	2
Smp_124120	-1.52268	0.0108708	DNA polymerase epsilon subunit b, putative	4.2066	1	1	1713	281	283	202	202	1	41	41	18	18	7	4.2066	12	Schisto_mansoni.Chr_1	7046283	7057877	4.8725	1	1	1713	268	268	205	205	1	42	42	21	21	7	4.8725	11	Schisto_mansoni.Chr_1	7046283	7057877	5.072	1	1	1713	277	278	206	206
Smp_205010	-1.5216	0.55686		3.48973	1	1	276	27	27	27	27	1	0	0	0	0	1	3.48973	12	Schisto_mansoni.SC_0214	178261	178536	0.442555	1	1	276	3	3	3	3	1	0	0	0	0	1	0.442555	1	Schisto_mansoni.SC_0214	178261	178536	2.2922	1	1	276	15	15	15	15
Smp_204940	-1.52064	0.311133		1.61482	1	1	243	10	11	10	11	0.909091	0	0	0	0	1	1.61482	1	Schisto_mansoni.SC_0178	14766	15008	4.52389	1	1	243	17	27	17	27	0.62963	0	0	0	0	1	4.52389	9	Schisto_mansoni.SC_0178	14766	15008	3.12418	1	1	243	10	18	10	18
Smp_134030	-1.51796	0.535748	hypothetical protein	0.339741	1	1	1155	4	11	4	11	0.363636	0	0	0	0	1	0.339741	0	Schisto_mansoni.Chr_2	3562298	3563452	0.246758	1	1	1155	2	7	2	7	0.285714	0	0	0	0	1	0.246758	0	Schisto_mansoni.Chr_2	3562298	3563452	0.839877	1	1	1155	7	23	7	23
Smp_147640	-1.51319	0.600141	homeobox protein even skipped, putative	0.0261339	1	1	1365	11	11	1	1	1	0	0	0	0	4	0.0261339	0	Schisto_mansoni.Chr_2	8407893	8421011	0.0894836	1	1	1365	12	13	3	3	1	0	0	1	1	4	0.0894836	0	Schisto_mansoni.Chr_2	8407893	8421011	0.0308985	1	1	1365	7	7	1	1
Smp_142580	-1.51317	0.107827	insulinprotein enhancer protein isl, putative	2.40928	1	1	459	32	33	31	31	1	0	0	0	0	3	2.40928	7	Schisto_mansoni.Chr_1	33865646	33870796	1.59667	1	1	459	22	22	18	18	1	1	1	0	0	3	1.59667	2	Schisto_mansoni.Chr_1	33865646	33870796	1.65398	1	1	459	19	20	18	18
Smp_130740	-1.51259	0.0427189	hypothetical protein	3.12919	1	1	285	25	25	25	25	1	12	12	0	0	2	3.12919	9	Schisto_mansoni.Chr_W	21438858	21439188	2.28576	1	1	285	16	16	16	16	1	8	8	0	0	2	2.28576	6	Schisto_mansoni.Chr_W	21438858	21439188	2.21981	1	1	285	15	15	15	15
Smp_037610	-1.51211	0.555716		0.0725057	1	1	1476	4	4	3	3	1	1	1	0	0	4	0.0725057	0	Schisto_mansoni.Chr_2	4967655	4978773	0.0275847	1	1	1476	3	3	1	1	1	0	0	0	0	4	0.0275847	0	Schisto_mansoni.Chr_2	4967655	4978773	0.171449	1	1	1476	8	8	6	6
Smp_109320	-1.5099	0.0364839	hypothetical protein	21.337	1	1	321	173	192	173	192	0.901042	0	0	0	0	1	21.337	61	Schisto_mansoni.SC_0037	1509864	1510184	18.1379	1	1	321	133	143	133	143	0.93007	0	0	0	0	1	18.1379	45	Schisto_mansoni.SC_0037	1509864	1510184	19.5772	1	1	321	138	149	138	149
Smp_014430	-1.50885	0.258887		0.956376	1	1	373	86	90	10	10	1	10	10	0	0	2	0.956376	0	Schisto_mansoni.SC_0037	1933801	1937468	2.18311	1	1	373	76	84	20	20	1	18	18	0	0	2	2.18311	2	Schisto_mansoni.SC_0037	1933801	1937468	1.6961	1	1	373	80	84	15	15
Smp_124600	-1.50768	0.00334506	hypothetical protein	3.72399	1	1	2117	461	461	221	221	1	6	6	43	43	5	3.72399	9	Schisto_mansoni.Chr_4	26902160	26908394	3.36567	1	1	2117	345	345	175	175	1	9	9	51	51	5	3.36567	6	Schisto_mansoni.Chr_4	26902160	26908394	3.84509	1	1	2117	415	415	193	193
Smp_201680	-1.50505	0.609868		1.33356	1	1	642	22	24	22	24	0.916667	0	0	0	0	1	1.33356	0	Schisto_mansoni.Chr_2	2525638	2526279	7.92738	1	1	642	120	125	120	125	0.96	0	0	0	0	1	7.92738	22	Schisto_mansoni.Chr_2	2525638	2526279	2.03656	1	1	642	31	31	31	31
Smp_143600	-1.50495	0.102076	normocyte-binding protein 1, putative	1.83567	1	1	3051	194	194	157	157	1	55	55	8	8	13	1.83567	4	Schisto_mansoni.Chr_2	28721479	28755377	1.29445	1	1	3051	131	133	97	97	1	31	31	8	8	13	1.29445	2	Schisto_mansoni.Chr_2	28721479	28755377	1.1059	1	1	3051	100	100	80	80
Smp_175670	-1.50485	0.216413	hypothetical protein	0.773726	2	2	876	26	31	17	19	0.894737	4	4	1	2	7	0.773726	1	Schisto_mansoni.SC_0276	94353	96641	0.511262	2	2	876	19	21	9	11	0.818182	4	4	3	4	7	0.511262	0	Schisto_mansoni.SC_0276	94353	96641	0.722199	2	1	876	23	23	15	15
Smp_167540	-1.50336	0.00294437	Ris2 protein , putative	3.10014	1	1	1680	172	172	146	146	1	32	32	10	10	8	3.10014	8	Schisto_mansoni.SC_0037	1356657	1370121	3.41716	1	1	1680	162	162	141	141	1	43	43	8	8	8	3.41716	8	Schisto_mansoni.SC_0037	1356657	1370121	3.03771	1	1	1680	132	132	121	121
Smp_083800	-1.5025	0.708377		0	1	0	588	3	3	0	0	#NUM!	0	0	0	0	4	0	0	Schisto_mansoni.Chr_1	37364095	37368762	0.0692433	1	0	588	4	4	1	1	1	0	0	1	1	4	0.0692433	0	Schisto_mansoni.Chr_1	37364095	37368762	0.286914	1	1	588	10	10	4	4
Smp_203800	-1.49846	0.276486		8.3936	1	1	204	9	48	9	48	0.1875	0	0	0	0	1	8.3936	18.5	Schisto_mansoni.Chr_W	41791208	41791411	6.58626	1	1	204	9	33	9	33	0.272727	0	0	0	0	1	6.58626	14.5	Schisto_mansoni.Chr_W	41791208	41791411	4.75518	1	1	204	4	23	4	23
Smp_019760	-1.49796	0.000369608	DNA polymerase theta, putative	4.07947	1	1	2772	413	423	317	317	1	84	84	16	16	12	4.07947	12	Schisto_mansoni.SC_0136	44253	69458	4.3917	1	1	2772	361	369	299	299	1	97	97	17	17	12	4.3917	9	Schisto_mansoni.SC_0136	44253	69458	4.16895	1	1	2772	336	346	274	274
Smp_167810	-1.49003	0.167264	family C50 non-peptidase homologue (C50 family)	2.83842	1	1	3984	374	377	317	317	1	88	88	8	8	13	2.83842	8	Schisto_mansoni.Chr_W	44938843	44965545	1.78844	1	1	3984	205	211	175	175	1	53	53	4	4	13	1.78844	4	Schisto_mansoni.Chr_W	44938843	44965545	2.47723	1	1	3984	274	275	234	234
Smp_165690	-1.48959	0.472708	hypothetical protein	0.82576	1	1	216	5	5	5	5	1	5	5	0	0	2	0.82576	2	Schisto_mansoni.Chr_6	6844633	6844884	0.376991	1	1	216	2	2	2	2	1	1	1	1	1	2	0.376991	1	Schisto_mansoni.Chr_6	6844633	6844884	0.195261	1	1	216	1	1	1	1
Smp_154990	-1.48813	0.244046	SPFH domain / Band 7 family protein, putative	4.27331	1	1	192	31	31	23	23	1	0	0	3	3	2	4.27331	13	Schisto_mansoni.SC_0062	1216614	1221514	2.12058	1	1	192	19	19	10	10	1	0	0	2	2	2	2.12058	6	Schisto_mansoni.SC_0062	1216614	1221514	2.8557	1	1	192	20	20	13	13
Smp_081600	-1.48756	0.100857		5.53544	1	1	348	54	54	54	54	1	0	0	0	0	1	5.53544	2	Schisto_mansoni.Chr_W	3545330	3545677	5.49887	1	1	348	47	47	47	47	1	0	0	0	0	1	5.49887	3	Schisto_mansoni.Chr_W	3545330	3545677	6.78701	1	1	348	56	56	56	56
Smp_159630	-1.48755	0.0145046		3.63048	1	1	2427	256	256	247	247	1	30	30	6	6	5	3.63048	9	Schisto_mansoni.SC_0156	502007	511823	2.80157	1	1	2427	171	171	167	167	1	24	24	4	4	5	2.80157	6	Schisto_mansoni.SC_0156	502007	511823	3.09329	1	1	2427	182	182	178	178
Smp_203100	-1.48717	0.069328		31.4261	1	1	252	215	222	215	222	0.968468	0	0	0	0	1	31.4261	81.5	Schisto_mansoni.Chr_6	18723710	18723961	28.5975	1	1	252	172	177	172	177	0.971751	0	0	0	0	1	28.5975	63.5	Schisto_mansoni.Chr_6	18723710	18723961	35.9839	1	1	252	205	215	205	215
Smp_178010	-1.48627	0.0859006		0.6579	1	1	488	0	9	0	9	0	0	0	0	0	1	0.6579	0	Schisto_mansoni.Chr_1	1629904	1630391	0.500595	1	1	488	0	6	0	6	0	0	0	0	0	1	0.500595	0	Schisto_mansoni.Chr_1	1629904	1630391	0.60499	1	1	488	1	7	1	7
Smp_154860	-1.48427	0.732986	hypothetical protein	0	1	0	819	14	14	0	0	#NUM!	0	0	0	0	6	0	0	Schisto_mansoni.Chr_2	10834886	10846628	0.0497131	1	1	819	10	10	1	1	1	0	0	0	0	6	0.0497131	0	Schisto_mansoni.Chr_2	10834886	10846628	0.102995	1	1	819	12	16	2	2
Smp_127190	-1.48406	0.00314197	hypothetical protein	9.09374	1	1	3150	923	933	803	803	1	15	15	16	16	3	9.09374	25	Schisto_mansoni.Chr_1	53959947	54021067	7.9362	1	1	3150	750	763	614	614	1	6	6	13	13	3	7.9362	18	Schisto_mansoni.Chr_1	53959947	54021067	8.94408	1	1	3150	765	777	668	668
Smp_174560	-1.48068	0.628573		0	1	0	749	0	0	0	0	#NUM!	0	0	0	0	4	0	0	Schisto_mansoni.Chr_3	17382705	17383550	0.108718	1	1	749	1	2	1	2	0.5	0	0	0	1	4	0.108718	0	Schisto_mansoni.Chr_3	17382705	17383550	0.112621	1	1	749	1	2	1	2
Smp_027820	-1.47942	0.119303	hypothetical protein	1.96313	1	1	636	166	207	26	35	0.742857	3	3	0	4	4	1.96313	5	Schisto_mansoni.SC_0176	99381	128248	2.11257	1	1	636	176	227	25	33	0.757576	4	4	3	3	4	2.11257	5	Schisto_mansoni.SC_0176	99381	128248	3.11681	1	1	636	157	205	40	47
Smp_191010	-1.47805	0.486241	clathrin heavy chain, putative	0.0747858	1	1	954	0	2	0	2	0	0	1	0	0	2	0.0747858	0	Schisto_mansoni.Chr_1	27052328	27053313	0.0426782	1	1	954	0	1	0	1	0	0	0	0	0	2	0.0426782	0	Schisto_mansoni.Chr_1	27052328	27053313	0.0884202	1	1	954	0	2	0	2
Smp_180190	-1.47797	0.00108705	hypothetical protein	7.19652	1	1	2994	755	765	604	604	1	283	283	17	17	22	7.19652	21	Schisto_mansoni.SC_0129	267230	309012	6.56826	1	1	2994	634	646	482	483	0.99793	226	227	17	17	22	6.56826	15	Schisto_mansoni.SC_0129	267230	309012	7.26888	1	1	2994	614	629	513	516
Smp_035290	-1.47401	0.00196034	hypothetical protein	13.086	1	1	995	713	736	365	365	1	161	161	32	32	6	13.086	35	Schisto_mansoni.Chr_1	14309800	14322228	13.8718	1	1	995	590	602	339	339	1	135	135	17	17	6	13.8718	35	Schisto_mansoni.Chr_1	14309800	14322228	13.4795	1	1	995	559	575	318	318
Smp_193580	-1.47335	0.0333531	hypothetical protein	2.65982	1	1	684	55	56	50	51	0.980392	7	7	2	2	2	2.65982	7	Schisto_mansoni.SC_0247	108799	110132	2.73815	1	1	684	50	50	46	46	1	11	11	2	2	2	2.73815	7	Schisto_mansoni.SC_0247	108799	110132	3.20639	1	1	684	56	57	51	52
Smp_193030	-1.47274	0.164188	core 1 udp-galactose:n-acetylgalactosamine-alpha- r beta 1,3- galactosyltransferase, putative	3.60829	1	1	435	32	79	1	44	0.0227273	0	23	1	7	3	3.60829	11	Schisto_mansoni.Chr_1.unplaced.SC_0094	965131	967576	2.62074	1	1	435	31	60	0	28	0	0	12	0	2	3	2.62074	7	Schisto_mansoni.Chr_1.unplaced.SC_0094	965131	967576	2.13306	1	1	435	21	47	0	22
Smp_188150	-1.47221	0.0804163	hypothetical protein	9.51275	1	1	195	52	52	52	52	1	0	0	0	0	1	9.51275	26	Schisto_mansoni.Chr_1.unplaced.SC_0034	1966543	1966737	10.4398	1	1	195	50	50	50	50	1	0	0	0	0	1	10.4398	25	Schisto_mansoni.Chr_1.unplaced.SC_0034	1966543	1966737	13.1936	1	1	195	61	61	61	61
Smp_200100	-1.47164	0.455332		0.339741	1	1	210	2	2	2	2	1	0	0	0	0	1	0.339741	1	Schisto_mansoni.Chr_1	57696227	57696436	0.969406	1	1	210	5	5	5	5	1	0	0	0	0	1	0.969406	2	Schisto_mansoni.Chr_1	57696227	57696436	0.40168	1	1	210	2	2	2	2
Smp_046780	-1.46725	0.805435	AUT1, putative	0.0904254	1	1	789	2	2	2	2	1	0	0	0	0	1	0.0904254	0	Schisto_mansoni.Chr_2	20209163	20209951	0	1	0	789	0	0	0	0	#NUM!	0	0	0	0	1	0	0	Schisto_mansoni.Chr_2	20209163	20209951	0	1	0	789	0	0	0	0
Smp_049400	-1.46567	0.286369		1.92353	1	1	408	15	22	15	22	0.681818	0	0	0	0	1	1.92353	5	Schisto_mansoni.Chr_1	49538630	49539037	0.798334	1	1	408	4	8	4	8	0.5	0	0	0	0	1	0.798334	2	Schisto_mansoni.Chr_1	49538630	49539037	1.34386	1	1	408	4	13	4	13
Smp_139580	-1.46472	0.619616	hypothetical protein	0.272312	1	1	786	1	6	1	6	0.166667	1	1	0	2	5	0.272312	0	Schisto_mansoni.SC_0125	470129	471791	0.0518003	1	1	786	0	1	0	1	0	0	0	0	0	5	0.0518003	0	Schisto_mansoni.SC_0125	470129	471791	0.0536596	1	1	786	0	1	0	1
Smp_196050	-1.46395	0.458943		0.787479	1	1	453	10	10	10	10	1	0	0	0	0	1	0.787479	2	Schisto_mansoni.SC_0169	329204	329656	0.808908	1	1	453	9	9	9	9	1	0	0	0	0	1	0.808908	2	Schisto_mansoni.SC_0169	329204	329656	0.186209	1	1	453	2	2	2	2
Smp_174400	-1.46283	0.190032		1.39263	1	1	333	14	14	13	13	1	0	0	6	6	3	1.39263	2	Schisto_mansoni.Chr_2	11949274	11950091	1.22267	1	1	333	12	12	10	10	1	0	0	4	4	3	1.22267	2	Schisto_mansoni.Chr_2	11949274	11950091	0.886591	1	1	333	7	7	7	7
Smp_144630	-1.46047	0.581854	hypothetical protein	0.73175	1	1	195	59	62	4	4	1	2	2	0	0	2	0.73175	2	Schisto_mansoni.Chr_7.unplaced.SC_0100	132262	157107	0.83518	1	1	195	55	55	4	4	1	4	4	0	0	2	0.83518	3	Schisto_mansoni.Chr_7.unplaced.SC_0100	132262	157107	0	1	0	195	43	43	0	0
Smp_152670	-1.45812	0.00244558	hypothetical protein	3.85091	1	1	1547	195	195	167	167	1	75	75	4	4	8	3.85091	10	Schisto_mansoni.SC_0225	286529	295079	3.73726	1	1	1547	167	167	142	142	1	55	55	7	7	8	3.73726	9	Schisto_mansoni.SC_0225	286529	295079	3.8714	1	1	1547	160	160	142	142
Smp_052290	-1.45803	0.267898	hypothetical protein	0.577534	1	1	2656	48	48	43	43	1	3	3	0	0	6	0.577534	1	Schisto_mansoni.Chr_4	2044260	2063874	0.321919	1	1	2656	24	24	21	21	1	7	7	0	0	6	0.321919	1	Schisto_mansoni.Chr_4	2044260	2063874	0.269954	1	1	2656	21	21	17	17
Smp_154390	-1.45438	0.507893	hypothetical protein	0.0664298	1	1	1611	3	3	3	3	1	0	0	0	0	1	0.0664298	0	Schisto_mansoni.Chr_W	24062902	24064512	0.151639	1	1	1611	6	6	6	6	1	0	0	0	0	1	0.151639	0	Schisto_mansoni.Chr_W	24062902	24064512	0.209442	1	1	1611	8	8	8	8
Smp_121350	-1.44959	0.811085	transcription factor hey (hesr1), putative	0	1	0	216	5	5	0	0	#NUM!	0	0	0	0	3	0	0	Schisto_mansoni.Chr_1	59551750	59564728	0.565487	1	1	216	5	5	3	3	1	2	2	1	1	3	0.565487	1	Schisto_mansoni.Chr_1	59551750	59564728	0	1	0	216	1	1	0	0
Smp_201480	-1.44593	0.0288467		1.63209	1	1	153	7	7	7	7	1	0	0	0	0	1	1.63209	5	Schisto_mansoni.Chr_2	13056308	13056460	1.86278	1	1	153	7	7	7	7	1	0	0	0	0	1	1.86278	5	Schisto_mansoni.Chr_2	13056308	13056460	1.65398	1	1	153	6	6	6	6
Smp_124410	-1.44562	0.00263138	fatty-acid amide hydrolase, putative	15.0017	1	1	1529	934	935	643	643	1	4	4	58	58	3	15.0017	45	Schisto_mansoni.Chr_2	19092987	19103097	13.474	1	1	1529	759	759	506	506	1	3	3	44	44	3	13.474	37	Schisto_mansoni.Chr_2	19092987	19103097	15.6955	1	1	1529	862	865	569	569
Smp_142040	-1.44474	0.126298	serine-rich repeat protein , putative	1.83769	1	1	1980	125	125	102	102	1	15	15	3	3	5	1.83769	5	Schisto_mansoni.SC_0222	144351	158916	1.25435	1	1	1980	80	80	61	61	1	4	4	2	2	5	1.25435	3	Schisto_mansoni.SC_0222	144351	158916	1.19287	1	1	1980	73	73	56	56
Smp_203770	-1.44459	0.161055		1.44133	1	1	198	8	8	8	8	1	0	0	0	0	1	1.44133	4	Schisto_mansoni.Chr_W	41087021	41087218	1.23379	1	1	198	6	6	6	6	1	0	0	0	0	1	1.23379	3	Schisto_mansoni.Chr_W	41087021	41087218	1.7041	1	1	198	8	8	8	8
Smp_202150	-1.4445	0.292974		2.46019	1	1	261	18	18	18	18	1	0	0	0	0	1	2.46019	5	Schisto_mansoni.Chr_3	20394538	20394798	1.24797	1	1	261	8	8	8	8	1	0	0	0	0	1	1.24797	3	Schisto_mansoni.Chr_3	20394538	20394798	1.93915	1	1	261	12	12	12	12
Smp_204190	-1.44308	0.0624211		1.74589	1	1	756	53	56	37	37	1	17	17	1	1	4	1.74589	5	Schisto_mansoni.Chr_W	33737465	33745271	1.56182	1	1	756	35	36	29	29	1	14	14	2	2	4	1.56182	4	Schisto_mansoni.Chr_W	33737465	33745271	2.0084	1	1	756	44	46	36	36
Smp_132740	-1.44277	0.00308968	fatty acid desaturase, putative	44.7303	1	1	1473	1921	1927	1847	1847	1	1228	1228	4	4	11	44.7303	139	Schisto_mansoni.Chr_1.unplaced.SC_0010	1471365	1494311	44.2531	1	1	1473	1680	1683	1601	1601	1	1105	1105	4	4	11	44.2531	118	Schisto_mansoni.Chr_1.unplaced.SC_0010	1471365	1494311	45.3261	1	1	1473	1636	1636	1583	1583
Smp_007000	-1.44245	0.0817393	partner of sld5, putative	4.63356	1	1	639	93	95	83	83	1	21	21	0	0	2	4.63356	12	Schisto_mansoni.Chr_2	36765	40311	5.60708	1	1	639	106	108	88	88	1	17	17	1	1	2	5.60708	13	Schisto_mansoni.Chr_2	36765	40311	3.89422	1	1	639	72	72	59	59
Smp_193370	-1.44192	0.499689		0.257565	1	0	277	66	66	2	2	1	0	0	2	2	5	0.257565	0	Schisto_mansoni.Chr_2	294208	298727	1.0289	1	1	277	50	50	7	7	1	0	0	6	6	5	1.0289	0	Schisto_mansoni.Chr_2	294208	298727	0.456784	1	0	277	45	45	3	3
Smp_148470	-1.44081	0.0958703	mitochondrial carrier protein-related	1.15886	1	1	708	44	44	23	23	1	8	8	3	3	5	1.15886	2	Schisto_mansoni.Chr_2	14328399	14336746	0.747593	1	1	708	22	22	13	13	1	6	6	5	5	5	0.747593	1	Schisto_mansoni.Chr_2	14328399	14336746	0.893568	1	1	708	33	33	15	15
Smp_075000	-1.44016	0.353322	hypothetical protein	0.139075	1	1	513	0	2	0	2	0	0	1	0	0	3	0.139075	0	Schisto_mansoni.SC_0657	6222	6808	0.317466	1	1	513	0	4	0	4	0	0	1	0	1	3	0.317466	1	Schisto_mansoni.SC_0657	6222	6808	0.328861	1	1	513	0	4	0	4
Smp_033700	-1.43956	0.00225231	DNA photolyase, putative	9.08521	1	1	1602	698	1650	408	408	1	189	189	4	4	8	9.08521	26	Schisto_mansoni.Chr_2.unplaced.SC_0108	593232	626752	10.344	1	1	1602	670	1793	407	407	1	188	188	4	4	8	10.344	26	Schisto_mansoni.Chr_2.unplaced.SC_0108	593232	626752	10.3466	1	1	1602	623	1627	393	393
Smp_170740	-1.43926	0.548706		16.8213	1	1	246	121	121	116	116	1	15	15	0	0	2	16.8213	42.5	Schisto_mansoni.Chr_4	29929974	29935871	7.11686	1	1	246	47	47	43	43	1	9	9	0	0	2	7.11686	18	Schisto_mansoni.Chr_4	29929974	29935871	2.91463	1	1	246	17	18	17	17
Smp_162710	-1.43616	0.00334933	protein kinase	6.187	1	1	1280	418	419	222	222	1	105	105	38	38	10	6.187	18	Schisto_mansoni.Chr_3	6793430	6806406	6.74343	1	1	1280	395	399	212	212	1	91	91	53	53	10	6.74343	16	Schisto_mansoni.Chr_3	6793430	6806406	5.83221	1	1	1280	326	326	177	177
Smp_118190	-1.43589	0.0214766	hypothetical protein	12.301	1	1	348	68	120	68	120	0.566667	51	51	2	2	2	12.301	37	Schisto_mansoni.Chr_3.unplaced.SC_0220	21003	21470	10.7637	1	1	348	60	92	60	92	0.652174	48	48	1	1	2	10.7637	26	Schisto_mansoni.Chr_3.unplaced.SC_0220	21003	21470	13.6952	1	1	348	68	113	68	113
Smp_180290	-1.43567	0.00364493	membrane associated guanylate kinase inverted related	8.12255	1	1	2578	786	786	587	587	1	190	190	55	55	10	8.12255	22	Schisto_mansoni.Chr_1	26730973	26752058	6.88586	1	1	2578	602	603	436	436	1	141	141	37	37	10	6.88586	16	Schisto_mansoni.Chr_1	26730973	26752058	7.57474	1	1	2578	627	628	463	463
Smp_155170	-1.43564	0.558629	egg protein CP391S-like	0.0312919	2	1	1140	1	1	1	1	1	1	1	0	0	7	0.0312919	0	Schisto_mansoni.Chr_5	8323884	8326308	0.035715	2	1	1140	1	1	1	1	1	1	1	0	0	7	0.035715	0	Schisto_mansoni.Chr_5	8323884	8326308	0.0739937	2	1	1140	2	2	2	2
Smp_153640	-1.43273	0.211565		2.83118	1	1	252	30	30	20	20	1	19	19	1	1	3	2.83118	6	Schisto_mansoni.SC_0013	1126662	1131410	2.10038	1	1	252	17	17	13	13	1	12	12	1	1	3	2.10038	3.5	Schisto_mansoni.SC_0013	1126662	1131410	2.0084	1	1	252	14	14	12	12
Smp_169420	-1.42722	0.124996	hypothetical protein	3.27274	1	1	327	51	53	30	30	1	17	17	1	1	2	3.27274	9	Schisto_mansoni.SC_0041	1126784	1132157	3.11277	1	1	327	50	52	25	25	1	15	15	2	2	2	3.11277	9	Schisto_mansoni.SC_0041	1126784	1132157	1.9347	1	1	327	47	50	15	15
Smp_124300	-1.42571	1.64328e-05	Lamin B receptor (ERG24)	18.6335	1	1	2014	1089	1089	1052	1052	1	350	350	7	7	8	18.6335	54	Schisto_mansoni.Chr_1	6004919	6012679	18.5785	1	1	2014	949	949	919	919	1	322	322	5	5	8	18.5785	47	Schisto_mansoni.Chr_1	6004919	6012679	19.0569	1	1	2014	924	924	910	910
Smp_121230	-1.42562	0.147182		0.58866	1	1	606	56	59	10	10	1	3	3	2	2	4	0.58866	1	Schisto_mansoni.Chr_7	8254213	8267852	0.873425	1	1	606	46	48	13	13	1	2	2	4	4	4	0.873425	2	Schisto_mansoni.Chr_7	8254213	8267852	0.904775	1	1	606	50	50	13	13
Smp_132110	-1.42398	0.62973		0.295165	1	1	846	2	7	2	7	0.285714	0	0	0	0	1	0.295165	0	Schisto_mansoni.Chr_W	33224939	33225784	0.433139	1	1	846	4	9	4	9	0.444444	0	0	0	0	1	0.433139	0	Schisto_mansoni.Chr_W	33224939	33225784	0.199416	1	1	846	4	4	4	4
Smp_149780	-1.42226	0.00221096	synaptotagmin-like protein	49.6694	1	1	288	823	823	401	401	1	83	83	263	263	4	49.6694	98	Schisto_mansoni.Chr_W	9970319	9976801	44.8148	1	1	288	678	678	317	317	1	69	69	206	206	4	44.8148	78	Schisto_mansoni.Chr_W	9970319	9976801	45.984	1	1	288	621	621	314	314
Smp_205710	-1.41935	0.031663		23.6605	1	1	294	276	283	190	195	0.974359	156	157	13	17	3	23.6605	61	Schisto_mansoni.SC_0547	7480	9071	18.5572	1	1	294	201	212	123	134	0.91791	100	105	11	17	3	18.5572	36.5	Schisto_mansoni.SC_0547	7480	9071	21.8055	1	1	294	208	217	144	152
Smp_147270	-1.41922	0.468979		0.174867	1	1	204	1	1	1	1	1	0	0	0	0	2	0.174867	0	Schisto_mansoni.Chr_2	20001889	20002959	0.199584	1	1	204	1	1	1	1	1	0	0	0	0	2	0.199584	0	Schisto_mansoni.Chr_2	20001889	20002959	0.206747	1	1	204	1	1	1	1
Smp_174250	-1.41922	0.468979		0.0612935	1	0	582	62	66	1	1	1	0	0	1	1	3	0.0612935	0	Schisto_mansoni.SC_0260	114137	119902	0.0699571	1	0	582	64	66	1	1	1	0	0	1	1	3	0.0699571	0	Schisto_mansoni.SC_0260	114137	119902	0.0724681	1	0	582	49	50	1	1
Smp_160360	-1.41835	0.00217164	sodium/chloride dependent neurotransmitter transporter, putative	107.66	1	1	2003	7977	7998	6031	6045	0.997684	3613	3613	151	151	13	107.66	309	Schisto_mansoni.SC_0134	305600	338852	109.929	1	1	2003	7135	7147	5403	5408	0.999075	3267	3267	132	132	13	109.929	279	Schisto_mansoni.SC_0134	305600	338852	120.697	1	1	2003	7256	7277	5719	5732
Smp_001050	-1.41809	0.434061	similar to Protein C20orf152 homolog, putative	0.315853	1	1	1920	63	63	17	17	1	4	4	4	4	11	0.315853	1	Schisto_mansoni.Chr_1	64336438	64357604	0.084823	1	1	1920	30	30	4	4	1	0	0	0	0	11	0.084823	0	Schisto_mansoni.Chr_1	64336438	64357604	0.197702	1	1	1920	45	45	9	9
Smp_171860	-1.41699	0.000409273	kh-domain rna binding protein-related	45.3974	1	1	1482	3172	3417	1886	1886	1	703	703	96	96	8	45.3974	131	Schisto_mansoni.Chr_W	16224775	16260249	44.2865	1	1	1482	2673	2892	1612	1612	1	612	612	94	94	8	44.2865	107	Schisto_mansoni.Chr_W	16224775	16260249	42.7741	1	1	1482	2408	2625	1503	1503
Smp_137820	-1.41647	0.143184	hypothetical protein	3.11625	1	1	435	54	54	38	38	1	0	0	26	26	3	3.11625	5	Schisto_mansoni.Chr_3	4998635	5002891	3.18233	1	1	435	48	48	34	34	1	0	0	27	27	3	3.18233	6	Schisto_mansoni.Chr_3	4998635	5002891	1.84219	1	1	435	32	32	19	19
Smp_194530	-1.41634	0.00338134	hypothetical protein	2.86209	1	1	2418	363	406	194	194	1	101	101	10	10	18	2.86209	8	Schisto_mansoni.Chr_2	5840390	5893014	3.08141	1	1	2418	341	370	183	183	1	97	97	7	7	18	3.08141	7	Schisto_mansoni.Chr_2	5840390	5893014	3.2269	1	1	2418	315	352	185	185
Smp_106040	-1.41598	0.0112884	hypothetical protein	4.36053	1	1	769	110	110	94	94	1	26	26	9	9	5	4.36053	11	Schisto_mansoni.Chr_3	11083160	11085052	4.97687	1	1	769	106	106	94	94	1	17	17	7	7	5	4.97687	11	Schisto_mansoni.Chr_3	11083160	11085052	4.16828	1	1	769	86	86	76	76
Smp_171190	-1.41484	0.500551	MEG-8 family	0.212023	1	1	673	40	40	4	4	1	3	3	1	1	16	0.212023	0	Schisto_mansoni.Chr_2	22854828	22873910	0.302489	1	1	673	45	45	5	5	1	4	4	1	1	16	0.302489	0	Schisto_mansoni.Chr_2	22854828	22873910	0.188008	1	1	673	28	28	3	3
Smp_127270	-1.41457	0.0122609	hypothetical protein	3.56728	1	1	890	104	105	89	89	1	44	44	2	2	6	3.56728	10	Schisto_mansoni.SC_0187	53747	63058	3.88852	1	1	890	108	111	85	85	1	38	38	0	0	6	3.88852	10	Schisto_mansoni.SC_0187	53747	63058	4.45459	1	1	890	112	112	94	94
Smp_147670	-1.41135	0.000221517	sorbin, putative	37.5032	1	1	2670	3162	3182	2807	2807	1	561	561	27	27	9	37.5032	112	Schisto_mansoni.Chr_2	6204324	6230493	36.1861	1	1	2670	2644	2664	2373	2373	1	503	503	15	15	9	36.1861	92	Schisto_mansoni.Chr_2	6204324	6230493	35.8579	1	1	2670	2526	2547	2270	2270
Smp_135360	-1.40951	0.116884	serine/threonine kinase	6.88194	1	1	819	164	164	158	158	1	64	64	1	1	5	6.88194	21	Schisto_mansoni.Chr_W	40379115	40385719	5.17016	1	1	819	107	107	104	104	1	43	43	0	0	5	5.17016	13	Schisto_mansoni.Chr_W	40379115	40385719	6.59167	1	1	819	134	134	128	128
Smp_182600	-1.4071	0.000453981	hypothetical protein	27.7455	1	1	225	175	175	175	175	1	0	0	0	0	1	27.7455	83	Schisto_mansoni.SC_0327	53000	53224	29.4958	1	1	225	163	163	163	163	1	0	0	0	0	1	29.4958	73	Schisto_mansoni.SC_0327	53000	53224	28.3051	1	1	225	151	151	151	151
Smp_200400	-1.40708	0.259573		2.89239	1	1	222	18	18	18	18	1	0	0	0	0	1	2.89239	8	Schisto_mansoni.Chr_1	18218953	18219174	2.01741	1	1	222	11	11	11	11	1	0	0	0	0	1	2.01741	4	Schisto_mansoni.Chr_1	18218953	18219174	1.32989	1	1	222	7	7	7	7
Smp_059490	-1.40578	0.308259	hypothetical protein	1.72332	1	1	207	10	10	10	10	1	0	0	0	0	1	1.72332	5	Schisto_mansoni.Chr_5	5974110	5974316	1.57353	1	1	207	8	8	8	8	1	0	0	0	0	1	1.57353	4	Schisto_mansoni.Chr_5	5974110	5974316	1.83376	1	1	207	9	9	9	9
Smp_141020	-1.40558	0.126687		3.38694	1	1	811	35	77	35	77	0.454545	0	0	0	0	1	3.38694	4	Schisto_mansoni.Chr_1.unplaced.SC_0094	1320689	1321499	4.01628	1	1	811	30	80	30	80	0.375	0	0	0	0	1	4.01628	1	Schisto_mansoni.Chr_1.unplaced.SC_0094	1320689	1321499	4.42046	1	1	811	35	85	35	85
Smp_020460	-1.40514	0.39162	elongation factor 1-alpha (ef-1-alpha), putative	1.81195	1	1	315	16	16	16	16	1	1	1	2	2	2	1.81195	0	Schisto_mansoni.SC_0169	24215	24706	1.16329	1	1	315	10	10	9	9	1	3	3	1	1	2	1.16329	2	Schisto_mansoni.SC_0169	24215	24706	1.87451	1	1	315	14	14	14	14
Smp_005720	-1.40496	0.000414928	aquaporin-3, putative	166.751	1	1	2055	9690	9691	9606	9606	1	484	484	4	4	2	166.751	508	Schisto_mansoni.Chr_1	38791244	38799993	164.584	1	1	2055	8391	8391	8307	8307	1	422	422	2	2	2	164.584	434	Schisto_mansoni.Chr_1	38791244	38799993	176.669	1	1	2055	8677	8678	8608	8608
Smp_141010	-1.40315	0.000550868	fer-1-related	65.1932	1	1	6807	13117	13882	12440	12440	1	4582	4582	131	131	35	65.1932	162	Schisto_mansoni.Chr_1.unplaced.SC_0094	1194514	1315612	60.0228	1	1	6807	10582	11205	10035	10035	1	3618	3618	124	124	35	60.0228	118	Schisto_mansoni.Chr_1.unplaced.SC_0094	1194514	1315612	62.7473	1	1	6807	10506	11211	10127	10127
Smp_167670	-1.40267	0.0366963	hypothetical protein	3.28565	1	0	228	46	46	21	21	1	0	0	21	21	2	3.28565	0	Schisto_mansoni.Chr_3.unplaced.SC_0044	1814005	1814466	3.03577	1	0	228	42	44	15	17	0.882353	0	0	15	17	2	3.03577	0	Schisto_mansoni.Chr_3.unplaced.SC_0044	1814005	1814466	3.5147	1	1	228	53	54	18	19
Smp_133480	-1.40262	0.308734	forkhead protein/ forkhead protein domain, putative	2.81628	1	1	342	107	111	27	27	1	8	8	0	0	2	2.81628	9	Schisto_mansoni.SC_0080	1071866	1104720	1.1905	1	1	342	79	82	10	10	1	1	1	0	0	2	1.1905	2	Schisto_mansoni.SC_0080	1071866	1104720	2.09649	1	1	342	62	64	17	17
Smp_178800	-1.40129	0.0158007	rest corepressor (corest) protein, putative	10.3004	1	1	471	136	136	136	136	1	59	59	0	0	3	10.3004	35	Schisto_mansoni.Chr_2	5250470	5251102	10.2868	1	1	471	119	119	119	119	1	55	55	0	0	3	10.2868	30	Schisto_mansoni.Chr_2	5250470	5251102	11.7306	1	1	471	131	131	131	131
Smp_167610	-1.4011	0.00111622	multidrug resistance-associated protein 4 (mrp/cmoat-related abc transporter	2.93408	1	1	3307	470	497	272	272	1	98	98	28	28	18	2.93408	6	Schisto_mansoni.Chr_1	37202580	37237446	2.9302	1	1	3307	497	526	238	238	1	90	90	24	24	18	2.9302	6	Schisto_mansoni.Chr_1	37202580	37237446	3.21393	1	1	3307	454	487	252	252
Smp_034220	-1.40037	0.198772	5-methyl tetrahydrofolate-homocysteine methyltransferase reductase, putative	17.0457	1	1	1737	871	871	830	830	1	145	145	12	12	4	17.0457	50	Schisto_mansoni.Chr_2	6688023	6692660	11.4387	1	1	1737	508	508	488	488	1	73	73	5	5	4	11.4387	29	Schisto_mansoni.Chr_2	6688023	6692660	20.9061	1	1	1737	883	883	861	861
Smp_037780	-1.40023	0.000591775	hypothetical protein	88.0488	1	1	1747	4312	4312	4312	4312	1	0	0	0	0	1	88.0488	255	Schisto_mansoni.Chr_1	33959206	33960952	90.9155	1	1	1747	3901	3901	3901	3901	1	0	0	0	0	1	90.9155	217	Schisto_mansoni.Chr_1	33959206	33960952	95.7721	1	1	1747	3967	3967	3967	3967
Smp_200370	-1.40022	0.403297		0.699467	1	1	204	4	4	4	4	1	0	0	0	0	1	0.699467	2	Schisto_mansoni.Chr_1	779457	779660	0.997918	1	1	204	5	5	5	5	1	0	0	0	0	1	0.997918	2	Schisto_mansoni.Chr_1	779457	779660	1.65398	1	1	204	8	8	8	8
Smp_159470	-1.3993	0.00802792	hypothetical protein	9.7265	1	1	1324	713	713	361	361	1	132	132	10	10	4	9.7265	11	Schisto_mansoni.Chr_W	9978872	9996108	9.04095	1	1	1324	568	568	294	294	1	115	115	9	9	4	9.04095	7	Schisto_mansoni.Chr_W	9978872	9996108	8.76021	1	1	1324	462	462	275	275
Smp_159320	-1.39885	0.183017	hypothetical protein	0.633245	1	1	1014	42	42	18	18	1	4	4	1	1	5	0.633245	1	Schisto_mansoni.Chr_2	31537502	31550300	0.602294	1	1	1014	30	31	15	15	1	1	1	0	0	5	0.602294	1	Schisto_mansoni.Chr_2	31537502	31550300	0.374347	1	1	1014	18	19	9	9
Smp_153630	-1.39834	0.0871751	hypothetical protein	5.04072	1	1	368	97	97	52	52	1	0	0	12	12	2	5.04072	7	Schisto_mansoni.SC_0013	1310083	1311052	5.4213	1	1	368	95	95	49	49	1	0	0	11	11	2	5.4213	6	Schisto_mansoni.SC_0013	1310083	1311052	7.44964	1	1	368	103	103	65	65
Smp_206060	-1.39826	0.167567		8.87102	1	1	378	73	94	73	94	0.776596	0	0	0	0	1	8.87102	29	Schisto_mansoni.SC_1338	881	1258	8.83236	1	1	378	48	82	48	82	0.585366	0	0	0	0	1	8.83236	26	Schisto_mansoni.SC_1338	881	1258	10.9346	1	1	378	63	98	63	98
Smp_122050	-1.39564	0.00194682	(dihydro)ceramide Synthase (LAG1)	14.8093	1	1	1149	883	1009	477	477	1	178	178	31	31	6	14.8093	41	Schisto_mansoni.Chr_1	60154336	60168497	15.7332	1	1	1149	826	940	444	444	1	169	169	37	37	6	15.7332	38	Schisto_mansoni.Chr_1	60154336	60168497	16.665	1	1	1149	794	899	454	454
Smp_031180	-1.39561	0.641893	phosphatidylcholine-sterol acyltransferase (lecithin-cholesterol acyltransferase)/ Phospholipase A	0.114336	1	1	1248	139	139	4	4	1	3	3	0	0	6	0.114336	0	Schisto_mansoni.Chr_W	7185735	7200918	0.0652485	1	1	1248	109	110	2	2	1	1	1	0	0	6	0.0652485	0	Schisto_mansoni.Chr_W	7185735	7200918	0	1	0	1248	107	108	0	0
Smp_149980	-1.39523	0.481815	soluble guanylate cyclase gcy, putative	0.194547	1	1	2017	65	66	11	11	1	2	2	1	1	11	0.194547	0	Schisto_mansoni.Chr_4	3269129	3322536	0.10093	1	1	2017	68	69	5	5	1	5	5	0	0	11	0.10093	0	Schisto_mansoni.Chr_4	3269129	3322536	0.104552	1	1	2017	40	40	5	5
Smp_139180	-1.39415	0.102602	frizzled, putative	0.529794	1	1	1818	28	28	27	27	1	1	1	1	1	4	0.529794	1	Schisto_mansoni.Chr_1.unplaced.SC_0071	1031250	1036847	0.828634	1	1	1818	40	40	37	37	1	2	2	3	3	4	0.828634	2	Schisto_mansoni.Chr_1.unplaced.SC_0071	1031250	1036847	0.649582	1	1	1818	34	34	28	28
Smp_128640	-1.39271	0.413791	glycosyltransferase-related	0.332946	1	1	750	18	18	7	7	1	6	6	0	0	7	0.332946	1	Schisto_mansoni.Chr_W	18905004	18921011	0.434294	1	1	750	19	20	8	8	1	4	4	1	1	7	0.434294	1	Schisto_mansoni.Chr_W	18905004	18921011	0.281176	1	1	750	21	21	5	5
Smp_078920	-1.39155	0.00163945	hypothetical protein	5.06347	1	1	3903	643	651	554	554	1	199	199	30	30	18	5.06347	14	Schisto_mansoni.SC_0134	51614	86069	4.81946	1	1	3903	527	531	462	462	1	150	150	27	27	18	4.81946	11	Schisto_mansoni.SC_0134	51614	86069	5.0897	1	1	3903	538	542	471	471
Smp_201360	-1.39104	0.695394		0	1	0	162	0	0	0	0	#NUM!	0	0	0	0	1	0	0	Schisto_mansoni.Chr_2	967308	967469	0.502655	1	1	162	2	2	2	2	1	0	0	0	0	1	0.502655	2	Schisto_mansoni.Chr_2	967308	967469	0.520697	1	1	162	2	2	2	2
Smp_169500	-1.38975	0.780136	homeobox-containing protein, putative	0.0166307	1	1	2145	1	1	1	1	1	0	0	0	0	6	0.0166307	0	Schisto_mansoni.SC_0164	309796	315210	0.0379627	1	1	2145	2	2	2	2	1	0	0	0	0	6	0.0379627	0	Schisto_mansoni.SC_0164	309796	315210	0	1	0	2145	1	1	0	0
Smp_167780	-1.38952	0.321265	hypothetical protein	1.037	1	1	516	15	15	15	15	1	0	0	2	2	3	1.037	0	Schisto_mansoni.Chr_W	46901671	46903183	1.10467	1	1	516	14	14	14	14	1	0	0	1	1	3	1.10467	0	Schisto_mansoni.Chr_W	46901671	46903183	1.96169	1	1	516	24	24	24	24
Smp_165430	-1.38831	0.503672		0.261915	1	1	1362	24	24	10	10	1	5	5	1	1	8	0.261915	1	Schisto_mansoni.Chr_W	26448269	26491558	0.209255	1	1	1362	30	30	7	7	1	3	3	0	0	8	0.209255	0	Schisto_mansoni.Chr_W	26448269	26491558	0.185799	1	1	1362	16	16	6	6
Smp_032470	-1.38466	0.170526	hypothetical protein	3.11429	1	1	252	0	22	0	22	0	0	0	0	0	1	3.11429	9	Schisto_mansoni.Chr_W	51077274	51077525	1.93881	1	1	252	0	12	0	12	0	0	0	0	0	1	1.93881	5	Schisto_mansoni.Chr_W	51077274	51077525	2.0084	1	1	252	0	12	0	12
Smp_039620	-1.38453	0.00345791	hypothetical protein	10.6285	1	1	584	278	280	174	174	1	59	59	9	9	4	10.6285	32	Schisto_mansoni.Chr_W	52891067	52899073	10.4576	1	1	584	236	237	150	150	1	55	55	10	10	4	10.4576	27	Schisto_mansoni.Chr_W	52891067	52899073	11.5552	1	1	584	242	243	160	160
Smp_105050	-1.38433	0.0264655	cerebellin-related	1.01581	1	1	597	26	26	17	17	1	5	5	1	1	3	1.01581	3	Schisto_mansoni.Chr_1	35534597	35539339	1.15939	1	1	597	27	27	17	17	1	4	4	1	1	3	1.15939	2	Schisto_mansoni.Chr_1	35534597	35539339	1.13036	1	1	597	27	27	16	16
Smp_124000	-1.38065	0.25105		0.687669	1	1	415	51	54	8	8	1	7	7	1	1	15	0.687669	2	Schisto_mansoni.Chr_1	7842571	7866930	0.392434	1	1	415	79	84	4	4	1	3	3	1	1	15	0.392434	1	Schisto_mansoni.Chr_1	7842571	7866930	0.40652	1	1	415	32	34	4	4
Smp_163200	-1.37992	0.564962		1.18909	1	1	360	12	12	12	12	1	0	0	0	0	1	1.18909	1	Schisto_mansoni.SC_0166	120948	121307	0.791681	1	1	360	7	7	7	7	1	0	0	0	0	1	0.791681	0	Schisto_mansoni.SC_0166	120948	121307	0.35147	1	1	360	3	3	3	3
Smp_177900	-1.37961	0.0119202	hypothetical protein	1.84205	1	1	2382	119	123	119	123	0.96748	0	0	0	0	1	1.84205	2	Schisto_mansoni.Chr_W.unplaced.SC_0115	1032228	1034609	1.658	1	1	2382	97	97	97	97	1	0	0	0	0	1	1.658	3	Schisto_mansoni.Chr_W.unplaced.SC_0115	1032228	1034609	1.61127	1	1	2382	89	91	89	91
Smp_148090	-1.37931	0.274761	hypothetical protein	1.09633	1	1	423	27	27	13	13	1	6	6	4	4	4	1.09633	2	Schisto_mansoni.SC_0465	18836	21096	1.05878	1	1	423	25	25	11	11	1	6	6	1	1	4	1.05878	3	Schisto_mansoni.SC_0465	18836	21096	0.897371	1	1	423	12	12	9	9
Smp_162550	-1.37799	0.000651754	cadherin, putative	9.7516	1	1	4152	1216	1216	1135	1135	1	190	190	5	5	8	9.7516	27	Schisto_mansoni.Chr_3	7486197	7511233	8.88435	1	1	4152	977	977	906	906	1	149	149	7	7	8	8.88435	19	Schisto_mansoni.Chr_3	7486197	7511233	9.46735	1	1	4152	975	975	932	932
Smp_045550	-1.37759	0.000823511	annexin, putative	124.192	1	1	2098	7850	7853	7304	7304	1	2085	2085	47	47	6	124.192	376	Schisto_mansoni.Chr_4	4548453	4568563	128.452	1	1	2098	7060	7060	6619	6619	1	1943	1943	34	34	6	128.452	349	Schisto_mansoni.Chr_4	4548453	4568563	135.696	1	1	2098	7148	7150	6750	6750
Smp_169000	-1.37667	0.179069		7.35076	1	0	165	1492	1665	34	34	1	0	0	34	34	2	7.35076	0	Schisto_mansoni.Chr_W	31694070	31706203	4.6884	1	0	165	1222	1355	19	19	1	0	0	19	19	2	4.6884	1	Schisto_mansoni.Chr_W	31694070	31706203	4.85668	1	0	165	1099	1231	19	19
Smp_147230	-1.37137	0.00432656	hypothetical protein	4.93254	1	1	2025	464	467	280	280	1	87	87	17	17	7	4.93254	14	Schisto_mansoni.Chr_2	20520959	20538168	5.64984	1	1	2025	429	431	281	281	1	73	73	23	23	7	5.64984	14	Schisto_mansoni.Chr_2	20520959	20538168	5.41524	1	1	2025	402	404	260	260
Smp_060760	-1.37036	0.268858	histone H2A, putative	0.660608	1	1	378	7	7	7	7	1	0	0	0	0	1	0.660608	2	Schisto_mansoni.Chr_1	52755853	52756230	1.07712	1	1	378	10	10	10	10	1	0	0	0	0	1	1.07712	3	Schisto_mansoni.Chr_1	52755853	52756230	0.669467	1	1	378	6	6	6	6
Smp_021070	-1.36857	0.00650245	GTP-binding protein-animal, putative	14.3743	1	1	1221	565	565	492	492	1	285	285	21	21	11	14.3743	42	Schisto_mansoni.Chr_2	29994160	29999540	16.2393	1	1	1221	590	592	487	487	1	290	290	35	35	11	16.2393	41	Schisto_mansoni.Chr_2	29994160	29999540	16.3732	1	1	1221	554	555	474	474
Smp_155250	-1.36839	0.209713	zinc finger protein, putative	0.348878	1	1	1227	65	65	12	12	1	3	3	3	3	6	0.348878	0	Schisto_mansoni.Chr_5	8521114	8550512	0.199096	1	1	1227	72	72	6	6	1	0	0	2	2	6	0.199096	0	Schisto_mansoni.Chr_5	8521114	8550512	0.309362	1	1	1227	68	68	9	9
Smp_173310	-1.3645	0.698709		0.0843329	1	1	846	0	2	0	2	0	0	0	0	0	1	0.0843329	0	Schisto_mansoni.SC_0154	44996	45841	0.0962531	1	1	846	2	2	2	2	1	0	0	0	0	1	0.0962531	0	Schisto_mansoni.SC_0154	44996	45841	0	1	0	846	0	0	0	0
Smp_200770	-1.36436	0.592722		0.440405	1	1	243	3	3	3	3	1	0	0	0	0	1	0.440405	1	Schisto_mansoni.Chr_1	22456919	22457161	0.837758	1	1	243	5	5	5	5	1	0	0	0	0	1	0.837758	2	Schisto_mansoni.Chr_1	22456919	22457161	0.173566	1	1	243	1	1	1	1
Smp_134110	-1.36373	0.405628	hypothetical protein	0.25166	1	1	567	16	16	4	4	1	0	0	1	1	3	0.25166	0	Schisto_mansoni.SC_0254	114008	118316	0.215424	1	1	567	20	20	3	3	1	0	0	2	2	3	0.215424	0	Schisto_mansoni.SC_0254	114008	118316	0.223156	1	1	567	13	13	3	3
Smp_190720	-1.36301	0.0207854	aspartyl-tRNA synthetase, putative	18.8164	1	1	273	139	144	139	144	0.965278	97	97	5	5	2	18.8164	43	Schisto_mansoni.SC_0249	45457	45767	21.3269	1	1	273	130	143	130	143	0.909091	96	96	2	2	2	21.3269	43	Schisto_mansoni.SC_0249	45457	45767	23.3283	1	1	273	140	151	140	151
Smp_143750	-1.36186	0.00289951	metazoan probable membrane protein, putative	6.48096	1	1	1943	568	582	353	353	1	135	135	5	5	9	6.48096	21	Schisto_mansoni.Chr_W	52751232	52780850	5.86733	1	1	1943	464	477	280	280	1	133	133	3	3	9	5.86733	16	Schisto_mansoni.Chr_W	52751232	52780850	6.40352	1	1	1943	445	457	295	295
Smp_125090	-1.36178	0.595803		0.205607	1	1	1041	2	6	2	6	0.333333	0	0	0	0	1	0.205607	0	Schisto_mansoni.SC_0148	504590	505630	0.547561	1	1	1041	4	14	4	14	0.285714	0	0	0	0	1	0.547561	1	Schisto_mansoni.SC_0148	504590	505630	0.162061	1	1	1041	2	4	2	4
Smp_179390	-1.3581	0.335355	hypothetical protein	2.55536	1	1	349	29	30	24	25	0.96	3	3	20	20	5	2.55536	3	Schisto_mansoni.Chr_1	33664736	33666942	2.56656	1	1	349	33	35	20	22	0.909091	4	4	15	15	5	2.56656	3	Schisto_mansoni.Chr_1	33664736	33666942	2.41699	1	1	349	32	34	20	20
Smp_114340	-1.35753	0.186201		1.45429	1	1	417	122	173	3	17	0.176471	0	0	0	0	4	1.45429	0	Schisto_mansoni.Chr_4	18813447	18819872	0.97638	1	1	417	72	101	3	10	0.3	0	0	1	1	4	0.97638	1	Schisto_mansoni.Chr_4	18813447	18819872	1.61828	1	1	417	121	183	5	16
Smp_031250	-1.35739	0.0279342		36.4745	1	1	267	636	636	273	273	1	0	0	114	114	2	36.4745	95	Schisto_mansoni.Chr_W	7371168	7371929	46.5097	1	1	267	649	649	305	305	1	0	0	144	144	2	46.5097	117	Schisto_mansoni.Chr_W	7371168	7371929	42.1764	1	1	267	572	572	267	267
Smp_160980	-1.35677	0.0768044		1.53248	1	1	1257	644	1373	1	54	0.0185185	1	1	0	37	3	1.53248	0	Schisto_mansoni.Chr_1	23018574	23030304	1.65192	1	1	1257	601	1240	0	51	0	0	0	0	38	3	1.65192	0	Schisto_mansoni.Chr_1	23018574	23030304	1.17436	1	1	1257	603	1198	0	35
Smp_099090	-1.35606	0.000624639	alpha(1,3)fucosyltransferase, putative	0.503853	1	1	1416	586	752	0	20	0	0	0	0	3	6	0.503853	0	Schisto_mansoni.Chr_W	44494512	44530036	0.517564	1	1	1416	501	626	1	18	0.0555556	0	0	1	5	6	0.517564	0	Schisto_mansoni.Chr_W	44494512	44530036	0.47657	1	1	1416	473	589	0	16
Smp_046500	-1.35232	0.00198886	proliferating cell nuclear antigen, putative	76.9864	2	2	917	1979	1979	1979	1979	1	941	941	3	3	8	76.9864	246	Schisto_mansoni.Chr_6	6149762	6150776	72.772	2	2	917	1639	1639	1639	1639	1	768	768	2	2	8	72.772	202	Schisto_mansoni.Chr_6	6149762	6150776	82.0531	2	2	917	1784	1784	1784	1784
Smp_194750	-1.35157	0.423779		0.233308	1	1	1529	23	26	10	10	1	2	2	0	0	6	0.233308	0	Schisto_mansoni.Chr_1	59864137	59879437	0.292914	1	1	1529	22	22	11	11	1	5	5	0	0	6	0.292914	1	Schisto_mansoni.Chr_1	59864137	59879437	0.110337	1	1	1529	13	13	4	4
Smp_203510	-1.35109	0.594549		0.767157	1	1	186	10	10	4	4	1	3	3	0	0	2	0.767157	2	Schisto_mansoni.Chr_W	21086286	21089226	1.31339	1	1	186	11	11	6	6	1	4	4	2	2	2	1.31339	4	Schisto_mansoni.Chr_W	21086286	21089226	2.4943	1	1	186	17	17	11	11
Smp_149970	-1.35046	0.0894111	hypothetical protein	5.41568	1	1	303	55	55	46	46	1	29	29	2	2	3	5.41568	17	Schisto_mansoni.Chr_4	3333887	3336264	6.18116	1	1	303	50	50	46	46	1	34	34	1	1	3	6.18116	14	Schisto_mansoni.Chr_4	3333887	3336264	7.51659	1	1	303	63	64	54	54
Smp_202170	-1.34992	0.155331		5.34424	1	1	267	220	223	40	40	1	3	3	13	13	2	5.34424	13	Schisto_mansoni.Chr_3	22397292	22400915	5.79465	1	1	267	232	233	38	38	1	3	3	13	13	2	5.79465	13	Schisto_mansoni.Chr_3	22397292	22400915	3.9491	1	1	267	168	169	25	25
Smp_149690	-1.34799	0.260038	hypothetical protein	2.37819	1	1	240	177	179	16	16	1	0	0	10	10	2	2.37819	5	Schisto_mansoni.SC_0239	23113	37797	2.54469	1	1	240	143	146	15	15	1	0	0	12	12	2	2.54469	1	Schisto_mansoni.SC_0239	23113	37797	1.93309	1	1	240	124	125	11	11
Smp_200060	-1.34747	0.371788		0.997305	1	1	930	24	26	24	26	0.923077	0	0	0	0	1	0.997305	0	Schisto_mansoni.Chr_1	56328731	56329660	1.05071	1	1	930	17	24	17	24	0.708333	0	0	0	0	1	1.05071	1	Schisto_mansoni.Chr_1	56328731	56329660	1.72334	1	1	930	29	38	29	38
Smp_161460	-1.34725	0.793724	hypothetical protein	0.0982722	1	1	726	1	2	1	2	0.5	0	0	0	0	2	0.0982722	0	Schisto_mansoni.Chr_1	55556455	55557667	0	1	0	726	0	0	0	0	#NUM!	0	0	0	0	2	0	0	Schisto_mansoni.Chr_1	55556455	55557667	0.0580942	1	1	726	0	1	0	1
Smp_130700	-1.34692	0.0472693	hypothetical protein	12.0454	1	1	231	78	78	78	78	1	0	0	0	0	1	12.0454	32	Schisto_mansoni.Chr_W	21293362	21293592	9.87031	1	1	231	56	56	56	56	1	0	0	0	0	1	9.87031	23	Schisto_mansoni.Chr_W	21293362	21293592	9.85942	1	1	231	54	54	54	54
Smp_191910	-1.34679	0.423338		0.298517	1	1	717	6	6	6	6	1	0	0	0	0	1	0.298517	0	Schisto_mansoni.SC_0113	850097	850813	0.340712	1	1	717	6	6	6	6	1	0	0	0	0	1	0.340712	1	Schisto_mansoni.SC_0113	850097	850813	0.529411	1	1	717	9	9	9	9
Smp_136160	-1.3464	0.000564949	hypothetical protein	17.1504	2	2	1352	904	907	650	650	1	373	373	75	75	13	17.1504	47	Schisto_mansoni.Chr_1	28669113	28686971	15.8704	2	2	1352	750	752	527	527	1	312	312	51	51	13	15.8704	39	Schisto_mansoni.Chr_1	28669113	28686971	16.1281	2	2	1352	701	701	517	517
Smp_178630	-1.34535	0.600212	hypothetical protein	1.12179	1	1	159	5	5	5	5	1	0	0	1	1	2	1.12179	4	Schisto_mansoni.SC_0550	7468	7631	2.56069	1	1	159	10	10	10	10	1	0	0	2	2	2	2.56069	6	Schisto_mansoni.SC_0550	7468	7631	1.59156	1	1	159	6	6	6	6
Smp_173880	-1.34503	0.264797	hypothetical protein	1.79361	1	1	537	144	165	27	27	1	1	1	7	7	3	1.79361	5	Schisto_mansoni.Chr_2	14770006	14782617	2.7295	1	1	537	138	146	36	36	1	0	0	10	10	3	2.7295	5	Schisto_mansoni.Chr_2	14770006	14782617	1.7279	1	1	537	128	138	22	22
Smp_133000	-1.34407	0.431984	hypothetical protein	1.37354	1	1	909	12	35	12	35	0.342857	0	0	4	4	2	1.37354	3	Schisto_mansoni.SC_0136	420251	421432	0.582283	1	1	909	4	14	4	13	0.307692	0	0	2	2	2	0.582283	1	Schisto_mansoni.SC_0136	420251	421432	1.29916	1	1	909	9	29	9	28
Smp_049300	-1.34372	0.0371344	major egg antigen, putative	74.0802	4	4	1448	1007	3010	1007	3007	0.334885	48	1634	4	18	8	74.0802	92	Schisto_mansoni.Chr_1	49146690	49148411	58.7106	4	4	1448	786	2089	786	2088	0.376437	31	1046	3	20	8	58.7106	63	Schisto_mansoni.Chr_1	49146690	49148411	76.5758	4	4	1448	858	2629	858	2629
Smp_000540	-1.33969	0.713417		1.7261	1	1	186	527	541	9	9	1	0	0	6	6	2	1.7261	3	Schisto_mansoni.SC_0113	464181	494076	0.656694	1	0	186	462	471	3	3	1	0	0	3	3	2	0.656694	0	Schisto_mansoni.SC_0113	464181	494076	0.226755	1	0	186	207	213	1	1
Smp_164040	-1.33952	0.028493	hypothetical protein	6.51417	1	1	690	158	164	126	126	1	81	81	11	11	6	6.51417	13	Schisto_mansoni.Chr_6	19280186	19294566	6.19577	1	1	690	123	132	105	105	1	67	67	8	8	6	6.19577	12	Schisto_mansoni.Chr_6	19280186	19294566	7.39615	1	1	690	147	153	121	121
Smp_205700	-1.33718	0.0340919		11.7385	1	1	234	77	77	77	77	1	0	0	0	0	1	11.7385	20	Schisto_mansoni.SC_0547	4439	4672	12.8757	1	1	234	74	74	74	74	1	0	0	0	0	1	12.8757	28.5	Schisto_mansoni.SC_0547	4439	4672	14.0588	1	1	234	78	78	78	78
Smp_188590	-1.33715	0.315961	titin, putative	0.371592	1	1	672	6	7	6	7	0.857143	6	6	0	0	2	0.371592	0	Schisto_mansoni.Chr_W	57980666	57982244	0.424115	1	1	672	5	7	5	7	0.714286	5	5	0	0	2	0.424115	0	Schisto_mansoni.Chr_W	57980666	57982244	0.564863	1	1	672	5	9	5	9
Smp_192670	-1.33647	0.661471	hypothetical protein	0.082576	1	1	432	0	1	0	1	0	0	0	0	0	1	0.082576	0	Schisto_mansoni.SC_0111	397814	398245	0.188496	1	1	432	0	2	0	2	0	0	0	0	0	1	0.188496	0	Schisto_mansoni.SC_0111	397814	398245	0.0976306	1	1	432	0	1	0	1
Smp_007950	-1.33521	0.293632	beta-1,4-galactosyltransferase, putative	11.6773	1	1	501	164	164	164	164	1	0	0	91	91	2	11.6773	22	Schisto_mansoni.Chr_4	16063962	16064504	8.53309	1	1	501	105	105	105	105	1	0	0	55	55	2	8.53309	17	Schisto_mansoni.Chr_4	16063962	16064504	5.64036	1	1	501	67	67	67	67
Smp_165410	-1.3331	0.271022	lhx3, putative	0.922025	1	1	1122	37	37	29	29	1	2	2	0	0	5	0.922025	3	Schisto_mansoni.Chr_1	12116156	12126319	0.798334	1	1	1122	29	30	22	22	1	5	5	2	2	5	0.798334	2	Schisto_mansoni.Chr_1	12116156	12126319	0.526265	1	1	1122	20	20	14	14
Smp_030350	-1.33291	0.757622	subfamily S1A unassigned peptidase (S01 family)	0.0490348	1	1	1455	2	2	2	2	1	0	0	0	0	1	0.0490348	0	Schisto_mansoni.SC_0370	27916	29370	0.0279828	1	1	1455	1	1	1	1	1	0	0	0	0	1	0.0279828	0	Schisto_mansoni.SC_0370	27916	29370	0.31886	1	1	1455	11	11	11	11
Smp_119320	-1.33247	0.42552	MAPk, putative	3.24298	1	1	198	18	18	18	18	1	0	0	0	0	1	3.24298	9	Schisto_mansoni.SC_0147	150825	151022	6.16895	1	1	198	30	30	30	30	1	0	0	0	0	1	6.16895	15	Schisto_mansoni.SC_0147	150825	151022	2.76916	1	1	198	13	13	13	13
Smp_122020	-1.33161	0.551313	bucentaur, putative	0.170956	1	1	626	3	3	3	3	1	0	0	0	0	1	0.170956	0	Schisto_mansoni.Chr_1	60013796	60014421	0.06504	1	1	626	1	1	1	1	1	0	0	0	0	1	0.06504	0	Schisto_mansoni.Chr_1	60013796	60014421	0.269498	1	1	626	4	4	4	4
Smp_176780	-1.33049	0.0142751	hypothetical protein	2.41739	1	1	2184	258	260	148	148	1	60	60	3	3	10	2.41739	6	Schisto_mansoni.Chr_1.unplaced.SC_0076	1402617	1446826	2.10659	1	1	2184	196	197	113	113	1	49	49	4	4	10	2.10659	5	Schisto_mansoni.Chr_1.unplaced.SC_0076	1402617	1446826	2.3367	1	1	2184	194	194	121	121
Smp_179420	-1.33043	0.22673	hypothetical protein	0.502434	1	1	1136	53	53	16	16	1	0	0	9	9	11	0.502434	0	Schisto_mansoni.Chr_3.unplaced.SC_0083	1472262	1478923	0.394248	1	1	1136	42	42	11	11	1	0	0	7	7	11	0.394248	0	Schisto_mansoni.Chr_3.unplaced.SC_0083	1472262	1478923	0.445526	1	1	1136	34	34	12	12
Smp_131780	-1.33017	0.0208223	bruno-like rna binding protein	14.4965	1	1	2542	1333	1343	1033	1033	1	289	289	60	60	11	14.4965	39	Schisto_mansoni.Chr_3.unplaced.SC_0105	576573	613447	12.1729	1	1	2542	978	984	760	760	1	253	253	44	44	11	12.1729	29	Schisto_mansoni.Chr_3.unplaced.SC_0105	576573	613447	13.3398	1	1	2542	954	957	804	804
Smp_145910	-1.32984	0.0309941	protein-tyrosine sulfotransferase, putative	11.2651	1	1	627	255	256	198	198	1	33	33	1	1	3	11.2651	16	Schisto_mansoni.Chr_3	9516750	9522761	9.09108	1	1	627	195	195	140	140	1	17	17	3	3	3	9.09108	10	Schisto_mansoni.Chr_3	9516750	9522761	11.5027	1	1	627	214	214	171	171
Smp_198660	-1.32885	0.0104274	hypothetical protein	11.3704	1	1	1302	753	753	415	415	1	6	6	30	30	2	11.3704	30	Schisto_mansoni.Chr_W	7660158	7664980	9.63152	1	1	1302	555	555	308	308	1	6	6	24	24	2	9.63152	20	Schisto_mansoni.Chr_W	7660158	7664980	11.0462	1	1	1302	571	571	341	341
Smp_152080	-1.32776	0.00998433		10.8431	1	1	783	127	265	100	238	0.420168	50	51	1	1	4	10.8431	31	Schisto_mansoni.Chr_2	5229087	5232712	11.2837	1	1	783	122	243	96	217	0.442396	43	45	7	9	4	11.2837	28	Schisto_mansoni.Chr_2	5229087	5232712	10.5576	1	1	783	101	218	79	196
Smp_145730	-1.32776	0.442501	hypothetical protein	0.299578	1	1	1548	21	21	13	13	1	1	1	2	2	5	0.299578	0	Schisto_mansoni.SC_0261	145070	151475	0.210414	1	1	1548	17	17	8	8	1	0	0	1	1	5	0.210414	0	Schisto_mansoni.SC_0261	145070	151475	0.19072	1	1	1548	11	11	7	7
Smp_112480	-1.32772	0.0686668	hypothetical protein	9.46161	1	1	279	29	74	29	74	0.391892	0	0	0	0	1	9.46161	23	Schisto_mansoni.SC_0037	1552676	1552954	11.6746	1	1	279	38	80	38	80	0.475	0	0	0	0	1	11.6746	25	Schisto_mansoni.SC_0037	1552676	1552954	12.8494	1	1	279	35	85	35	85
Smp_072330	-1.3272	0.0173291	heat shock protein, putative	1641.27	2	2	2248	103428	103428	103428	103428	1	1	1	0	0	3	1641.27	4638	Schisto_mansoni.Chr_1	51110400	51112647	1704.96	2	2	2248	94136	94136	94136	94136	1	0	0	0	0	3	1704.96	4277	Schisto_mansoni.Chr_1	51110400	51112647	1957.23	2	2	2248	104320	104320	104320	104320
Smp_160670	-1.3245	0.498298	paired box protein pax-6, putative	0.037779	1	1	3777	15	16	4	4	1	2	2	0	0	5	0.037779	0	Schisto_mansoni.Chr_4	16186591	16207492	0.0323392	1	1	3777	13	13	3	3	1	0	0	0	0	5	0.0323392	0	Schisto_mansoni.Chr_4	16186591	16207492	0.0669999	1	1	3777	9	9	6	6
Smp_162360	-1.32406	0.488969	myoglobin 1, putative	0.477228	1	1	598	8	8	8	8	1	2	2	0	0	3	0.477228	1	Schisto_mansoni.SC_0144	787981	790720	0.204256	1	1	598	3	3	3	3	1	1	1	1	1	3	0.204256	0	Schisto_mansoni.SC_0144	787981	790720	0.352646	1	1	598	6	6	5	5
Smp_200520	-1.32384	0.168897		0.994226	1	1	897	26	26	25	25	1	3	3	0	0	2	0.994226	3	Schisto_mansoni.Chr_1	26512112	26514207	1.08937	1	1	897	24	24	24	24	1	2	2	0	0	2	1.08937	2	Schisto_mansoni.Chr_1	26512112	26514207	1.12847	1	1	897	24	24	24	24
Smp_143740	-1.3234	0.00469767	uroporphyrinogen decarboxylase	10.6882	1	1	1305	393	393	391	391	1	104	104	0	0	4	10.6882	32	Schisto_mansoni.Chr_W	52873985	52878402	11.6685	1	1	1305	374	374	374	374	1	86	86	1	1	4	11.6685	31	Schisto_mansoni.Chr_W	52873985	52878402	11.8288	1	1	1305	367	367	366	366
Smp_127870	-1.32285	0.146899	Neurotrimin precursor (hNT), putative	8.68953	1	1	156	38	38	38	38	1	0	0	0	0	1	8.68953	29	Schisto_mansoni.Chr_7	2874293	2874448	7.30783	1	1	156	28	28	28	28	1	0	0	0	0	1	7.30783	17	Schisto_mansoni.Chr_7	2874293	2874448	9.1923	1	1	156	34	34	34	34
Smp_012000	-1.32285	0.332757	acetylcholine receptor-related	0.29052	1	1	2333	19	19	19	19	1	1	1	0	0	3	0.29052	1	Schisto_mansoni.Chr_W	18619127	18624896	0.48865	1	1	2333	29	29	28	28	1	0	0	0	0	3	0.48865	1	Schisto_mansoni.Chr_W	18619127	18624896	0.560424	1	1	2333	34	34	31	31
Smp_150310	-1.32213	0.122527	hypothetical protein	1.01199	1	1	1269	73	73	36	36	1	3	3	4	4	3	1.01199	3	Schisto_mansoni.SC_0134	401751	414424	0.834193	1	1	1269	57	57	26	26	1	3	3	2	2	3	0.834193	2	Schisto_mansoni.SC_0134	401751	414424	0.664719	1	1	1269	50	50	20	20
Smp_203150	-1.32161	0.0364211		9.13362	1	1	207	53	53	53	53	1	0	0	0	0	1	9.13362	7	Schisto_mansoni.Chr_6	6843142	6843348	9.24448	1	1	207	47	47	47	47	1	0	0	0	0	1	9.24448	6	Schisto_mansoni.Chr_6	6843142	6843348	11.41	1	1	207	56	56	56	56
Smp_158930	-1.32087	0.00350757	hypothetical protein	26.8141	1	1	4200	3198	3198	3157	3157	1	22	22	3	3	4	26.8141	34	Schisto_mansoni.Chr_4	791269	802984	24.4775	1	1	4200	2565	2566	2525	2525	1	17	17	3	3	4	24.4775	24	Schisto_mansoni.Chr_4	791269	802984	23.5887	1	1	4200	2380	2381	2349	2349
Smp_182890	-1.32075	0.0531835		28.4061	1	1	108	104	104	86	86	1	70	70	16	16	2	28.4061	73.5	Schisto_mansoni.SC_1299	633	915	35.8142	1	1	108	114	114	95	95	1	76	76	19	19	2	35.8142	84	Schisto_mansoni.SC_1299	633	915	28.8987	1	1	108	87	87	74	74
Smp_142220	-1.31947	0.764702	apobec-1 complementation factor, putative	0.0507437	1	1	2109	11	11	3	3	1	0	0	0	0	6	0.0507437	0	Schisto_mansoni.SC_0041	137732	160295	0.0193054	1	1	2109	4	4	1	1	1	0	0	0	0	6	0.0193054	0	Schisto_mansoni.SC_0041	137732	160295	0	1	0	2109	5	5	0	0
Smp_206290	-1.31862	0.00474543		20.5772	1	1	423	244	244	244	244	1	0	0	0	0	1	20.5772	36	Schisto_mansoni.SC_2388	1297	1719	20.0206	1	1	423	208	208	208	208	1	0	0	0	0	1	20.0206	26	Schisto_mansoni.SC_2388	1297	1719	18.7451	1	1	423	188	188	188	188
Smp_127020	-1.31794	0.027324	ets, putative	1.87309	1	1	1695	180	180	89	89	1	12	12	20	20	6	1.87309	5	Schisto_mansoni.Chr_4	8360517	8386816	1.63341	1	1	1695	138	138	68	68	1	3	3	10	10	6	1.63341	3	Schisto_mansoni.Chr_4	8360517	8386816	1.99063	1	1	1695	136	138	79	80
Smp_126910	-1.3176	0.0142621	WD-repeat protein, putative	11.8988	1	1	3043	1178	1182	1015	1015	1	396	396	24	24	14	11.8988	35	Schisto_mansoni.Chr_4	7776251	7792706	10.3025	1	1	3043	939	942	770	770	1	270	270	13	13	14	10.3025	25	Schisto_mansoni.Chr_4	7776251	7792706	10.6169	1	1	3043	890	892	766	766
Smp_166820	-1.31714	0.0211817	hypothetical protein	3.17391	1	1	2911	492	792	259	259	1	112	112	2	2	15	3.17391	9	Schisto_mansoni.Chr_3	2338718	2372036	3.11902	1	1	2911	395	613	223	223	1	86	86	6	6	15	3.11902	7	Schisto_mansoni.Chr_3	2338718	2372036	3.11506	1	1	2911	402	667	215	215
Smp_140000	-1.31682	0.0092752	tetraspanin-CD63 receptor , putative	54.6204	1	1	1830	3001	3016	2802	2802	1	1422	1422	5	5	9	54.6204	178.5	Schisto_mansoni.Chr_7	5746360	5781301	50.3932	1	1	1830	2430	2451	2265	2265	1	1150	1150	3	3	9	50.3932	143	Schisto_mansoni.Chr_7	5746360	5781301	49.5746	1	1	1830	2295	2312	2151	2151
Smp_185680	-1.31607	0.243311	hypothetical protein	8.91821	1	1	324	0	81	0	81	0	0	80	0	1	2	8.91821	3	Schisto_mansoni.Chr_1	49134964	49135395	10.3044	1	1	324	1	82	1	82	0.0121951	0	81	0	0	2	10.3044	3.5	Schisto_mansoni.Chr_1	49134964	49135395	12.3665	1	1	324	0	95	0	95
Smp_091870	-1.3157	0.00824835		22.7071	1	1	2589	2463	2585	1648	1648	1	490	490	43	43	11	22.7071	62	Schisto_mansoni.Chr_1.unplaced.SC_0034	1981975	2009853	21.3404	1	1	2589	1987	2083	1357	1357	1	401	401	29	29	11	21.3404	49	Schisto_mansoni.Chr_1.unplaced.SC_0034	1981975	2009853	19.8746	1	1	2589	1707	1783	1220	1220
Smp_200320	-1.31348	0.663047		0.16289	1	1	219	1	1	1	1	1	0	0	0	0	1	0.16289	0	Schisto_mansoni.Chr_1	7675233	7675451	0.371827	1	1	219	2	2	2	2	1	0	0	0	0	1	0.371827	1	Schisto_mansoni.Chr_1	7675233	7675451	0.385173	1	1	219	2	2	2	2
Smp_011100	-1.31286	0.544706	M16 family peptidase, putative	0.0866371	1	1	1647	21	23	4	4	1	1	1	0	0	12	0.0866371	0	Schisto_mansoni.Chr_2	27411531	27428883	0.0988829	1	1	1647	13	13	4	4	1	1	1	2	2	12	0.0988829	0	Schisto_mansoni.Chr_2	27411531	27428883	0.0768241	1	1	1647	18	21	3	3
Smp_043570	-1.31251	0.0128337	hypothetical protein	28.8913	1	1	384	321	321	311	311	1	6	6	0	0	2	28.8913	61	Schisto_mansoni.Chr_5	4367305	4380796	25.977	1	1	384	262	263	245	245	1	8	8	0	0	2	25.977	44.5	Schisto_mansoni.Chr_5	4367305	4380796	31.3028	1	1	384	290	290	285	285
Smp_177890	-1.3123	0.336163	hypothetical protein	1.02094	1	1	594	16	17	16	17	0.941176	0	0	0	0	1	1.02094	1	Schisto_mansoni.Chr_W.unplaced.SC_0115	1034673	1035266	1.0967	1	1	594	15	16	15	16	0.9375	0	0	0	0	1	1.0967	1	Schisto_mansoni.Chr_W.unplaced.SC_0115	1034673	1035266	0.923053	1	1	594	13	13	13	13
Smp_154170	-1.31205	0.0460498	hypothetical protein	3.41548	1	1	282	63	65	27	27	1	26	26	1	1	3	3.41548	9	Schisto_mansoni.Chr_5	5980781	5991787	3.60949	1	1	282	63	65	25	25	1	23	23	1	1	3	3.60949	10	Schisto_mansoni.Chr_5	5980781	5991787	3.88861	1	1	282	56	57	26	26
Smp_212030	-1.31124	0.0457398		1.79879	1	1	3649	221	221	184	184	1	46	46	5	5	10	1.79879	5	Schisto_mansoni.SC_0238	108660	128081	1.70715	1	1	3649	181	181	153	153	1	46	46	2	2	10	1.70715	4	Schisto_mansoni.SC_0238	108660	128081	2.01115	1	1	3649	201	201	174	174
Smp_075360	-1.31111	0.0446064		9.98729	1	1	1293	362	362	362	362	1	0	0	0	0	1	9.98729	29	Schisto_mansoni.Chr_W.unplaced.SC_0185	294368	295660	8.25007	1	1	1293	262	262	262	262	1	0	0	0	0	1	8.25007	21	Schisto_mansoni.Chr_W.unplaced.SC_0185	294368	295660	9.81833	1	1	1293	301	301	301	301
Smp_199710	-1.30954	0.584724		1.3625	1	1	288	11	11	11	11	1	0	0	0	0	1	1.3625	4	Schisto_mansoni.SC_0434	517	804	0.84823	1	1	288	6	6	6	6	1	0	0	0	0	1	0.84823	2	Schisto_mansoni.SC_0434	517	804	0.878675	1	1	288	6	6	6	6
Smp_060290	-1.30764	0.00538517	family C86 unassigned peptidase (C86 family)	13.322	1	1	1371	526	526	512	512	1	43	43	0	0	2	13.322	21	Schisto_mansoni.Chr_W	42202939	42207171	11.968	1	1	1371	411	411	403	403	1	43	43	0	0	2	11.968	22	Schisto_mansoni.Chr_W	42202939	42207171	13.3513	1	1	1371	439	439	434	434
Smp_197730	-1.30752	0.000347448	rrm-containing protein seb-4, putative	22.9788	1	1	1762	1329	1334	1135	1135	1	31	31	2	2	2	22.9788	69	Schisto_mansoni.Chr_3.unplaced.SC_0105	1229432	1242872	23.4077	1	1	1762	1164	1166	1013	1013	1	23	23	3	3	2	23.4077	61	Schisto_mansoni.Chr_3.unplaced.SC_0105	1229432	1242872	22.0217	1	1	1762	1012	1013	920	920
Smp_152740	-1.30733	0.00514982	hypothetical protein	6.75844	1	1	2428	575	577	460	460	1	109	109	1	1	8	6.75844	20	Schisto_mansoni.Chr_1	31447469	31463012	6.85851	1	1	2428	536	539	409	409	1	89	89	17	17	8	6.85851	17	Schisto_mansoni.Chr_1	31447469	31463012	7.10468	1	1	2428	508	510	409	409
Smp_165610	-1.30729	0.195634	hypothetical protein	0.81213	1	1	1757	47	47	40	40	1	0	0	1	1	2	0.81213	2	Schisto_mansoni.SC_0156	297560	301663	0.787884	1	1	1757	42	42	34	34	1	0	0	2	2	2	0.787884	1	Schisto_mansoni.SC_0156	297560	301663	0.720144	1	1	1757	34	34	30	30
Smp_151210	-1.30641	0.544766	beta-1,3-galactosyltransferase brn, putative	0.108099	1	1	1320	4	4	4	4	1	0	0	0	0	2	0.108099	0	Schisto_mansoni.Chr_W	41747658	41750402	0.0616895	1	1	1320	3	4	1	2	0.5	0	0	0	0	2	0.0616895	0	Schisto_mansoni.Chr_W	41747658	41750402	0.127807	1	1	1320	4	4	4	4
Smp_101820	-1.30452	0.0111837	lupus la ribonucleoprotein, putative	12.1799	1	1	3128	1140	1140	1068	1068	1	309	309	37	37	11	12.1799	33	Schisto_mansoni.Chr_1	20040866	20049984	14.3049	1	1	3128	1161	1161	1099	1099	1	319	319	45	45	11	14.3049	34	Schisto_mansoni.Chr_1	20040866	20049984	13.9419	1	1	3128	1089	1089	1034	1034
Smp_199630	-1.30382	0.00721582	hypothetical protein	9.40069	1	1	2292	713	797	604	604	1	144	144	42	42	8	9.40069	24	Schisto_mansoni.SC_0386	3308	26672	8.72211	1	1	2292	602	681	491	491	1	106	106	30	30	8	8.72211	20	Schisto_mansoni.SC_0386	3308	26672	8.09669	1	1	2292	540	608	440	440
Smp_099800	-1.3022	0.00262849	hypothetical protein	105.075	1	1	6534	20189	20228	19218	19246	0.998545	6919	6919	429	434	28	105.075	270	Schisto_mansoni.Chr_3	1779616	1821077	100.093	1	1	6534	16830	16865	16044	16063	0.998817	5840	5840	334	339	28	100.093	217	Schisto_mansoni.Chr_3	1779616	1821077	93.8997	1	1	6534	15083	15106	14535	14547
Smp_145390	-1.30183	0.0505238	DNA (cytosine-5)-methyltransferase, putative	4.8279	1	1	266	128	128	36	36	1	19	19	7	7	2	4.8279	12	Schisto_mansoni.Chr_W.unplaced.SC_0115	1037280	1039958	5.66337	1	1	266	119	119	37	37	1	21	21	7	7	2	5.66337	13	Schisto_mansoni.Chr_W.unplaced.SC_0115	1037280	1039958	6.18376	1	1	266	117	117	39	39
Smp_087010	-1.30159	4.33288e-05	DNA polymerase delta catalytic subunit, putative	7.43941	1	1	3534	906	908	737	737	1	332	332	20	20	16	7.43941	19	Schisto_mansoni.SC_0041	1369508	1407680	7.43101	1	1	3534	803	807	645	645	1	286	286	18	18	16	7.43101	17	Schisto_mansoni.SC_0041	1369508	1407680	7.54259	1	1	3534	784	786	632	632
Smp_045860	-1.30149	0.0110057	histidine acid phosphatase, putative	24.7406	2	2	2493	1809	1829	1729	1729	1	313	313	25	25	8	24.7406	73	Schisto_mansoni.Chr_W	36831340	36851387	21.4762	2	2	2493	1405	1422	1315	1315	1	230	230	15	15	8	21.4762	54	Schisto_mansoni.Chr_W	36831340	36851387	21.5196	2	2	2493	1323	1336	1272	1272
Smp_047720	-1.30122	0.0171745	hypothetical protein	3.85596	1	1	3423	498	498	370	370	1	58	58	30	30	9	3.85596	10	Schisto_mansoni.Chr_3.unplaced.SC_0124	644566	666328	3.36616	1	1	3423	406	406	283	283	1	53	53	25	25	9	3.36616	7	Schisto_mansoni.Chr_3.unplaced.SC_0124	644566	666328	3.57323	1	1	3423	382	383	290	290
Smp_017860	-1.30013	0.00152942	metallo phosphoesterase related	13.7559	1	1	848	456	456	327	327	1	174	174	49	49	7	13.7559	39	Schisto_mansoni.Chr_W	32427462	32433522	13.1556	1	1	848	399	399	274	274	1	169	169	33	33	7	13.1556	30.5	Schisto_mansoni.Chr_W	32427462	32433522	12.6828	1	1	848	351	351	255	255
Smp_180890	-1.29911	0.0644838	hypothetical protein	4.9996	1	1	1320	262	263	185	185	1	38	38	18	18	5	4.9996	14	Schisto_mansoni.Chr_2	4028800	4048832	5.18191	1	1	1320	214	214	168	168	1	40	40	23	23	5	5.18191	12	Schisto_mansoni.Chr_2	4028800	4048832	4.3135	1	1	1320	195	195	135	135
Smp_034860	-1.29896	0.333152	nuclear receptor, putative	0.19622	1	1	5454	62	63	30	30	1	1	1	5	5	8	0.19622	0	Schisto_mansoni.Chr_1	15490317	15522363	0.119443	1	1	5454	47	48	16	16	1	1	1	2	2	8	0.119443	0	Schisto_mansoni.Chr_1	15490317	15522363	0.231994	1	1	5454	59	62	30	30
Smp_149420	-1.29827	0.00400164	kh-domain rna binding protein-related	35.7226	1	1	2148	2571	2590	2151	2151	1	361	361	395	395	9	35.7226	92	Schisto_mansoni.Chr_6	14458469	14482688	35.7489	1	1	2148	2293	2316	1886	1886	1	318	318	366	366	9	35.7489	80	Schisto_mansoni.Chr_6	14458469	14482688	32.1232	1	1	2148	1943	1956	1636	1636
Smp_163140	-1.2972	0.496846	pituitary homeobox protein-related	0.0725943	1	1	2457	8	8	5	5	1	0	0	0	0	2	0.0725943	0	Schisto_mansoni.Chr_W	53475141	53483141	0.16571	1	1	2457	13	13	10	10	1	2	2	0	0	2	0.16571	0	Schisto_mansoni.Chr_W	53475141	53483141	0.0858291	1	1	2457	9	9	5	5
Smp_176890	-1.29485	0.0134517		98.56	1	1	291	804	804	804	804	1	0	0	0	0	1	98.56	329	Schisto_mansoni.Chr_3	1775362	1775652	113.61	1	1	291	812	812	812	812	1	0	0	0	0	1	113.61	332	Schisto_mansoni.Chr_3	1775362	1775652	103.05	1	1	291	711	711	711	711
Smp_206210	-1.29462	0.463406		2.24357	1	1	159	10	10	10	10	1	0	0	0	0	1	2.24357	6	Schisto_mansoni.SC_1651	1923	2081	3.3289	1	1	159	13	13	13	13	1	0	0	0	0	1	3.3289	7	Schisto_mansoni.SC_1651	1923	2081	2.91787	1	1	159	11	11	11	11
Smp_203860	-1.29355	0.800709		0.167478	1	1	213	1	1	1	1	1	0	0	0	0	1	0.167478	0	Schisto_mansoni.Chr_W	45600755	45600967	1.1469	1	1	213	6	6	6	6	1	0	0	0	0	1	1.1469	0	Schisto_mansoni.Chr_W	45600755	45600967	0	1	0	213	0	0	0	0
Smp_173510	-1.29265	0.0647981	hypothetical protein	2.40221	1	1	297	20	20	20	20	1	0	0	0	0	1	2.40221	8	Schisto_mansoni.SC_0136	287523	287819	3.01593	1	1	297	22	22	22	22	1	0	0	0	0	1	3.01593	8	Schisto_mansoni.SC_0136	287523	287819	2.27213	1	1	297	16	16	16	16
Smp_169390	-1.29245	0.374274	4.1 G protein, putative	0.717042	1	1	597	20	20	12	12	1	9	9	0	0	6	0.717042	2	Schisto_mansoni.Chr_1	48154826	48166982	0.954792	1	1	597	23	23	14	14	1	10	10	1	1	6	0.954792	1	Schisto_mansoni.Chr_1	48154826	48166982	1.201	1	1	597	25	25	17	17
Smp_035550	-1.2896	0.0196571	hypothetical protein	7.85107	1	1	468	110	110	103	103	1	48	48	3	3	3	7.85107	23	Schisto_mansoni.Chr_1	13057311	13060850	7.13383	1	1	468	94	94	82	82	1	47	47	2	2	3	7.13383	16	Schisto_mansoni.Chr_1	13057311	13060850	8.02073	1	1	468	100	100	89	89
Smp_203940	-1.2885	0.469216		1.81667	1	1	216	15	17	9	11	0.818182	9	9	0	0	2	1.81667	4	Schisto_mansoni.Chr_W	51432730	51434969	2.45044	1	1	216	22	22	13	13	1	13	13	0	0	2	2.45044	5	Schisto_mansoni.Chr_W	51432730	51434969	0.976306	1	1	216	8	8	5	5
Smp_157860	-1.28739	0.0655424	hypothetical protein	4.30461	1	1	4185	657	658	505	505	1	72	72	44	44	9	4.30461	10	Schisto_mansoni.Chr_W	33901299	33933242	3.68722	1	1	4185	522	522	379	379	1	60	60	35	35	9	3.68722	7	Schisto_mansoni.Chr_W	33901299	33933242	3.16449	1	1	4185	397	397	314	314
Smp_162070	-1.28584	0.123843		149.55	1	1	957	2424	4012	2424	4012	0.604187	0	0	0	0	1	149.55	448	Schisto_mansoni.SC_0172	15345	16301	189.918	1	1	957	2594	4464	2594	4464	0.581093	0	0	0	0	1	189.918	480	Schisto_mansoni.SC_0172	15345	16301	196.867	1	1	957	2566	4467	2566	4467
Smp_198560	-1.28518	0.164958	putative neutral sphingomyelinase	56.3255	1	1	456	1530	2150	616	720	0.855556	2	2	203	307	2	56.3255	125.5	Schisto_mansoni.Chr_W	56318300	56328931	41.4293	1	1	456	1174	1691	382	464	0.823276	1	1	112	194	2	41.4293	81	Schisto_mansoni.Chr_W	56318300	56328931	37.2743	1	1	456	1018	1474	307	403
Smp_199090	-1.28443	0.000716177	peptidyl-glycine alpha-amidating monooxygenase, putative	40.6106	1	1	708	1764	1767	806	806	1	102	102	138	138	3	40.6106	108	Schisto_mansoni.SC_0203	412970	423542	38.1847	1	1	708	1496	1501	664	664	1	80	80	109	109	3	38.1847	86	Schisto_mansoni.SC_0203	412970	423542	39.5553	1	1	708	1450	1452	664	664
Smp_182270	-1.28108	0.0178191	hypothetical protein	14.7286	1	1	264	109	109	109	109	1	0	0	0	0	1	14.7286	43	Schisto_mansoni.Chr_W	36827926	36828189	14.1886	1	1	264	92	92	92	92	1	0	0	0	0	1	14.1886	37	Schisto_mansoni.Chr_W	36827926	36828189	16.1357	1	1	264	101	101	101	101
Smp_109090	-1.27838	0.0221809	hypothetical protein	18.6098	1	1	738	243	385	243	385	0.631169	0	0	0	0	1	18.6098	42.5	Schisto_mansoni.SC_0328	31664	32401	18.0404	1	1	738	194	327	194	327	0.593272	0	0	0	0	1	18.0404	52	Schisto_mansoni.SC_0328	31664	32401	16.2876	1	1	738	164	285	164	285
Smp_160880	-1.27687	0.000228185	phosphatidylcholine-sterol acyltransferase (lecithin-cholesterol acyltransferase)/ Phospholipase A	151.075	1	1	1336	6306	6306	5658	5658	1	1565	1565	639	639	5	151.075	497	Schisto_mansoni.Chr_3	22427685	22431981	144.148	1	1	1336	5224	5224	4730	4730	1	1267	1267	552	552	5	144.148	402.5	Schisto_mansoni.Chr_3	22427685	22431981	145.944	1	1	1336	5094	5094	4623	4623
Smp_095980	-1.27677	0.779666	superoxide dismutase precursor (EC 1.15.1.1), putative	0	1	0	624	4	4	0	0	#NUM!	0	0	0	0	3	0	0	Schisto_mansoni.SC_0184	285974	291136	0.260994	1	1	624	4	4	4	4	1	1	1	0	0	3	0.260994	0	Schisto_mansoni.SC_0184	285974	291136	0.0675904	1	1	624	3	3	1	1
Smp_110050	-1.27635	0.0139709	tyrosine kinase, putative	15.5018	1	1	573	261	312	207	249	0.831325	146	158	10	10	4	15.5018	44	Schisto_mansoni.SC_0181	99259	103785	14.4244	1	1	573	209	246	170	203	0.837438	113	128	14	14	4	14.4244	38	Schisto_mansoni.SC_0181	99259	103785	14.7213	1	1	573	211	257	167	200
Smp_099810	-1.27388	0.218319	hypothetical protein	37.0522	1	1	750	1026	1026	779	779	1	492	492	127	127	7	37.0522	105	Schisto_mansoni.Chr_3	1860825	1868261	28.3377	1	1	750	716	716	522	522	1	322	322	84	84	7	28.3377	65	Schisto_mansoni.Chr_3	1860825	1868261	22.7753	1	1	750	547	547	405	405
Smp_201060	-1.27324	0.00543994		1720.75	1	1	270	13041	13041	13024	13024	1	5604	5604	25	25	2	1720.75	5148	Schisto_mansoni.Chr_1	44178194	44178781	1863.69	1	1	270	12374	12374	12359	12359	1	5164	5164	22	22	2	1863.69	4813	Schisto_mansoni.Chr_1	44178194	44178781	1875.6	1	1	270	12025	12025	12007	12007
Smp_130880	-1.273	0.0156571	histone H2A, putative	13.422	1	1	699	763	774	263	263	1	31	31	45	45	3	13.422	42	Schisto_mansoni.Chr_4	21115425	21135920	13.0475	1	1	699	737	747	224	224	1	25	25	45	45	3	13.0475	37	Schisto_mansoni.Chr_4	21115425	21135920	11.766	1	1	699	634	639	195	195
Smp_200570	-1.27273	0.179366		7.0625	1	1	495	98	98	98	98	1	0	0	0	0	1	7.0625	21	Schisto_mansoni.Chr_1	39888140	39888634	4.93516	1	1	495	60	60	60	60	1	0	0	0	0	1	4.93516	12	Schisto_mansoni.Chr_1	39888140	39888634	7.32762	1	1	495	86	86	86	86
Smp_168990	-1.27255	0.171961	hypothetical protein	2.82303	1	1	1390	152	152	110	110	1	48	48	4	4	7	2.82303	6	Schisto_mansoni.Chr_W	31669847	31685875	2.25544	1	1	1390	108	108	77	77	1	35	35	10	10	7	2.25544	4	Schisto_mansoni.Chr_W	31669847	31685875	3.18599	1	1	1390	137	139	105	105
Smp_137330	-1.27146	0.000865598	Serine dehydratase, putative	36.1561	1	1	3691	3805	3805	3741	3741	1	537	537	93	93	9	36.1561	99	Schisto_mansoni.Chr_1.unplaced.SC_0010	193049	200550	37.5602	1	1	3691	3466	3466	3405	3405	1	489	489	65	65	9	37.5602	88	Schisto_mansoni.Chr_1.unplaced.SC_0010	193049	200550	37.2172	1	1	3691	3300	3300	3257	3257
Smp_152450	-1.27081	0.00686434		6.65689	1	1	702	142	144	131	131	1	59	59	0	0	5	6.65689	21	Schisto_mansoni.SC_0097	1014135	1024795	6.43785	1	1	702	115	115	111	111	1	42	42	0	0	5	6.43785	18	Schisto_mansoni.SC_0097	1014135	1024795	6.66892	1	1	702	119	119	111	111
Smp_136180	-1.26925	0.0045642	DNA polymerase eta, putative	19.1625	1	1	1493	888	888	802	802	1	386	386	48	48	9	19.1625	54	Schisto_mansoni.Chr_1	28602650	28614698	20.3439	1	1	1493	813	815	746	746	1	310	310	58	58	9	20.3439	51	Schisto_mansoni.Chr_1	28602650	28614698	17.9384	1	1	1493	698	698	635	635
Smp_072460	-1.26852	0.187994	phosphomevalonate kinase	4.43777	1	1	627	78	78	78	78	1	0	0	0	0	1	4.43777	14	Schisto_mansoni.Chr_1	55987693	55988319	5.45465	1	1	627	84	84	84	84	1	0	0	0	0	1	5.45465	15	Schisto_mansoni.Chr_1	55987693	55988319	5.98676	1	1	627	89	89	89	89
Smp_134980	-1.26832	0.0723859	oxalate:formate antiporter, putative	7.87194	1	1	1074	538	546	237	237	1	126	126	37	37	9	7.87194	19	Schisto_mansoni.Chr_W	11510740	11525602	7.77149	1	1	1074	427	431	205	205	1	106	106	34	34	9	7.77149	16	Schisto_mansoni.Chr_W	11510740	11525602	6.28327	1	1	1074	343	344	160	160
Smp_165010	-1.2679	0.464437		0.653348	1	1	273	5	5	5	5	1	0	0	0	0	1	0.653348	1	Schisto_mansoni.Chr_6	7851911	7852183	0.894836	1	1	273	6	6	6	6	1	0	0	0	0	1	0.894836	2	Schisto_mansoni.Chr_6	7851911	7852183	0.463477	1	1	273	3	3	3	3
Smp_148110	-1.26716	0.14371	hypothetical protein	0.986215	1	1	1266	198	198	35	35	1	2	2	13	13	6	0.986215	2	Schisto_mansoni.Chr_W	20530304	20551974	1.28642	1	1	1266	178	178	40	40	1	2	2	14	14	6	1.28642	3	Schisto_mansoni.Chr_W	20530304	20551974	1.19933	1	1	1266	161	162	36	36
Smp_186950	-1.26691	0.3718	hypothetical protein	13.8728	1	1	576	224	224	224	224	1	0	0	0	0	1	13.8728	39	Schisto_mansoni.SC_0173	269789	270364	11.9459	1	1	576	169	169	169	169	1	0	0	0	0	1	11.9459	31	Schisto_mansoni.SC_0173	269789	270364	18.1593	1	1	576	248	248	248	248
Smp_204780	-1.2649	0.277067		6.77784	1	1	300	57	57	57	57	1	0	0	0	0	1	6.77784	20	Schisto_mansoni.SC_0149	709587	709886	4.75009	1	1	300	35	35	35	35	1	0	0	0	0	1	4.75009	11	Schisto_mansoni.SC_0149	709587	709886	7.16999	1	1	300	51	51	51	51
Smp_173630	-1.2647	0.0669011		2.57233	1	1	1470	426	429	106	106	1	19	19	0	0	6	2.57233	1	Schisto_mansoni.Chr_1	30866368	30884005	3.01901	1	1	1470	452	456	109	109	1	20	20	2	2	6	3.01901	0	Schisto_mansoni.Chr_1	30866368	30884005	2.52485	1	1	1470	374	380	88	88
Smp_210230	-1.26456	0.110866	SEL-1 like protein	5.14635	1	1	1116	114	163	114	161	0.708075	114	114	0	0	3	5.14635	5	Schisto_mansoni.Chr_3	11712119	11719549	5.98321	1	1	1116	106	171	106	164	0.646341	106	106	0	1	3	5.98321	7	Schisto_mansoni.Chr_3	11712119	11719549	6.65148	1	1	1116	105	179	105	176
Smp_039590	-1.26401	0.0790133	hypothetical protein	32.9232	1	1	493	470	472	455	455	1	112	112	132	132	3	32.9232	98	Schisto_mansoni.Chr_W	52976256	52979986	24.5281	1	1	493	310	312	297	297	1	85	85	79	79	3	24.5281	58	Schisto_mansoni.Chr_W	52976256	52979986	30.7126	1	1	493	377	377	359	359
Smp_002810	-1.26314	0.0118268	fidgetin like-1	15.6744	1	1	1056	568	571	464	464	1	305	305	60	60	10	15.6744	41	Schisto_mansoni.Chr_6	2903236	2913488	14.9597	1	1	1056	494	495	388	388	1	246	246	48	48	10	14.9597	35	Schisto_mansoni.Chr_6	2903236	2913488	16.0159	1	1	1056	502	505	401	401
Smp_118940	-1.26173	0.809656	maguk P55 subfamily member 2,6, putative	0.038482	1	1	927	0	1	0	1	0	0	0	0	0	2	0.038482	0	Schisto_mansoni.SC_0184	504056	505023	0.0878426	1	1	927	1	2	1	2	0.5	0	0	0	0	2	0.0878426	0	Schisto_mansoni.SC_0184	504056	505023	0.454978	1	1	927	2	10	2	10
Smp_152540	-1.26114	0.166828	G-protein coupled receptor fragment, putative	0.958947	1	1	1674	63	64	45	45	1	2	2	11	11	5	0.958947	2	Schisto_mansoni.Chr_4	23969600	23991065	0.656694	1	1	1674	41	41	27	27	1	2	2	6	6	5	0.656694	1	Schisto_mansoni.Chr_4	23969600	23991065	0.730655	1	1	1674	43	43	29	29
Smp_028860	-1.25807	0.122089	hypothetical protein	1.11652	1	1	639	20	20	20	20	1	0	0	0	0	1	1.11652	3	Schisto_mansoni.Chr_2	7555001	7555639	1.33805	1	1	639	21	21	21	21	1	0	0	0	0	1	1.33805	2	Schisto_mansoni.Chr_2	7555001	7555639	1.18807	1	1	639	18	18	18	18
Smp_199550	-1.25771	0.216279	DNA repair/transcription protein met18/mms19, putative	38.0044	1	1	153	163	163	163	163	1	0	0	0	0	1	38.0044	111	Schisto_mansoni.SC_0328	14549	14701	45.2389	1	1	153	170	170	170	170	1	0	0	0	0	1	45.2389	116	Schisto_mansoni.SC_0328	14549	14701	29.2203	1	1	153	106	106	106	106
Smp_106930	-1.25717	0.0284021		1747.41	1	1	2736	134017	134021	134017	134021	0.99997	0	0	0	0	1	1747.41	6157	Schisto_mansoni.Chr_1	47704341	47707076	1959.34	1	1	2736	131662	131665	131662	131665	0.999977	0	0	0	0	1	1959.34	5959	Schisto_mansoni.Chr_1	47704341	47707076	2063.56	1	1	2736	133864	133864	133864	133864
Smp_027920	-1.25677	0.102585	tubulin alpha chain, putative	19.7344	1	1	1560	868	868	863	863	1	11	11	6	6	2	19.7344	60	Schisto_mansoni.SC_0241	238167	240227	24.1941	1	1	1560	937	937	927	927	1	10	10	11	11	2	24.1941	67	Schisto_mansoni.SC_0241	238167	240227	25.1436	1	1	1560	941	941	930	930
Smp_172970	-1.25614	0.0025775	hypothetical protein	16.3267	1	1	1276	685	689	584	584	1	109	109	6	6	3	16.3267	49	Schisto_mansoni.Chr_2	5203609	5209852	16.6562	1	1	1276	609	610	522	522	1	72	72	5	5	3	16.6562	52	Schisto_mansoni.Chr_2	5203609	5209852	17.7498	1	1	1276	614	618	537	537
Smp_138230	-1.25593	0.0419563	hypothetical protein	0.493516	1	1	3831	75	75	53	53	1	1	1	5	5	4	0.493516	1	Schisto_mansoni.Chr_3	18581223	18593940	0.584528	1	1	3831	85	85	55	55	1	2	2	5	5	4	0.584528	1	Schisto_mansoni.Chr_3	18581223	18593940	0.561472	1	1	3831	68	69	51	51
Smp_155620	-1.2536	0.0140854		42.7971	1	1	1392	3238	3238	1670	1670	1	0	0	180	180	2	42.7971	124	Schisto_mansoni.Chr_2.unplaced.SC_0213	182842	186541	41.066	1	1	1392	2723	2723	1404	1404	1	0	0	155	155	2	41.066	104	Schisto_mansoni.Chr_2.unplaced.SC_0213	182842	186541	39.9949	1	1	1392	2553	2553	1320	1320
Smp_151410	-1.25339	0.0441671	protein phosphatase-7, putative	2.80106	1	1	1974	343	346	155	155	1	75	75	15	15	11	2.80106	7	Schisto_mansoni.Chr_1	42562758	42582285	2.97009	1	1	1974	301	303	144	144	1	70	70	14	14	11	2.97009	5	Schisto_mansoni.Chr_1	42562758	42582285	2.47845	1	1	1974	246	247	116	116
Smp_124470	-1.25316	0.237194	hypothetical protein	0.129719	1	1	825	3	3	3	3	1	0	0	0	0	1	0.129719	0	Schisto_mansoni.Chr_1.unplaced.SC_0010	686376	687200	0.0987031	1	1	825	2	2	2	2	1	0	0	0	0	1	0.0987031	0	Schisto_mansoni.Chr_1.unplaced.SC_0010	686376	687200	0.153369	1	1	825	3	3	3	3
Smp_190740	-1.2526	0.826355	hypothetical protein	0.0352847	1	1	1011	1	1	1	1	1	0	0	0	0	1	0.0352847	0	Schisto_mansoni.Chr_3	20567333	20568343	0.0805441	1	1	1011	1	2	1	2	0.5	0	0	0	0	1	0.0805441	0	Schisto_mansoni.Chr_3	20567333	20568343	0.125153	1	1	1011	1	3	1	3
Smp_145680	-1.25248	0.00409208	hypothetical protein	4.23896	1	1	5226	801	803	621	621	1	94	94	66	66	15	4.23896	11	Schisto_mansoni.Chr_5	4550780	4599215	4.05125	1	1	5226	684	686	520	520	1	104	104	65	65	15	4.05125	8	Schisto_mansoni.Chr_5	4550780	4599215	3.76892	1	1	5226	591	595	467	467
Smp_154660	-1.25029	0.472731		3.43516	1	0	135	17	17	13	13	1	0	0	13	13	3	3.43516	0	Schisto_mansoni.SC_0558	1411	1761	4.2223	1	0	135	24	24	14	14	1	0	0	14	14	3	4.2223	0	Schisto_mansoni.SC_0558	1411	1761	2.18693	1	0	135	9	9	7	7
Smp_193610	-1.24899	0.564204	hypothetical protein	1.91348	1	1	261	14	14	14	14	1	0	0	0	0	1	1.91348	6	Schisto_mansoni.Chr_1	31384212	31384472	1.09197	1	1	261	7	7	7	7	1	0	0	0	0	1	1.09197	2	Schisto_mansoni.Chr_1	31384212	31384472	0.807977	1	1	261	5	5	5	5
Smp_054680	-1.24889	0.721503	hypothetical protein	1.50812	1	1	615	26	27	26	26	1	26	26	0	0	5	1.50812	4	Schisto_mansoni.SC_0214	297505	309032	0.99305	1	1	615	15	15	15	15	1	15	15	0	0	5	0.99305	2	Schisto_mansoni.SC_0214	297505	309032	0.960114	1	1	615	15	16	14	14
Smp_202620	-1.24665	0.156833		8.00352	1	1	156	35	35	35	35	1	0	0	0	0	1	8.00352	22	Schisto_mansoni.Chr_4	28301572	28301727	8.09081	1	1	156	30	31	30	31	0.967742	0	0	0	0	1	8.09081	19	Schisto_mansoni.Chr_4	28301572	28301727	8.92193	1	1	156	33	33	33	33
Smp_124200	-1.24638	0.257449	scavenger receptor-related	0.55475	1	1	4437	111	113	69	69	1	15	15	4	4	19	0.55475	1	Schisto_mansoni.Chr_1	6620498	6666116	0.596457	1	1	4437	98	98	65	65	1	13	13	2	2	19	0.596457	1	Schisto_mansoni.Chr_1	6620498	6666116	0.38973	1	1	4437	72	73	41	41
Smp_119170	-1.24606	0.126428		25.9183	1	1	2154	1565	1565	1565	1565	1	0	0	0	0	1	25.9183	75	Schisto_mansoni.Chr_1	23063657	23065810	19.3179	1	1	2154	1022	1022	1022	1022	1	0	0	0	0	1	19.3179	49	Schisto_mansoni.Chr_1	23063657	23065810	19.4043	1	1	2154	991	991	991	991
Smp_185930	-1.24603	0.0385034	hypothetical protein	9.55844	1	1	989	163	265	163	265	0.615094	0	0	0	0	1	9.55844	3	Schisto_mansoni.SC_0172	11380	12368	9.59212	1	1	989	149	233	149	233	0.639485	0	0	0	0	1	9.59212	2	Schisto_mansoni.SC_0172	11380	12368	10.704	1	1	989	150	251	150	251
Smp_200280	-1.24499	0.0349508		289.153	1	1	246	2074	2074	1994	1994	1	1701	1701	44	44	3	289.153	794.5	Schisto_mansoni.Chr_1	1191024	1192363	290.302	1	1	246	1847	1847	1754	1754	1	1472	1472	33	33	3	290.302	715	Schisto_mansoni.Chr_1	1191024	1192363	289.234	1	1	246	1767	1767	1687	1687
Smp_175490	-1.24488	0.158565	androgen induced inhibitor of proliferation (as3) / pds5, putative	4.83379	1	1	1321	179	179	179	179	1	77	77	0	0	7	4.83379	14	Schisto_mansoni.Chr_3	4721113	4722629	3.76021	1	1	1321	122	122	122	122	1	60	60	1	1	7	3.76021	9	Schisto_mansoni.Chr_3	4721113	4722629	3.3524	1	1	1321	105	105	105	105
Smp_138490	-1.24483	0.18295	hypothetical protein	6.85022	1	1	276	53	53	53	53	1	3	3	19	19	2	6.85022	12	Schisto_mansoni.Chr_3	19860883	19861209	9.14613	1	1	276	62	62	62	62	1	3	3	26	26	2	9.14613	20	Schisto_mansoni.Chr_3	19860883	19861209	6.72378	1	1	276	44	44	44	44
Smp_098610	-1.24475	0.103742	hypothetical protein	9.32981	1	1	195	51	51	51	51	1	41	41	3	3	2	9.32981	27	Schisto_mansoni.SC_0186	241693	241921	8.5606	1	1	195	41	41	41	41	1	37	37	1	1	2	8.5606	21	Schisto_mansoni.SC_0186	241693	241921	7.35384	1	1	195	34	34	34	34
Smp_119260	-1.24469	0.494602	hypothetical protein	2.70249	1	1	396	30	30	30	30	1	0	0	0	0	1	2.70249	4	Schisto_mansoni.Chr_1	38325298	38325693	6.27176	1	1	396	61	61	61	61	1	0	0	0	0	1	6.27176	11	Schisto_mansoni.Chr_1	38325298	38325693	6.49687	1	1	396	61	61	61	61
Smp_156610	-1.24385	0.61117	hypothetical protein	2.32649	1	1	138	9	9	9	9	1	0	0	0	0	2	2.32649	9	Schisto_mansoni.Chr_4	9647701	9648014	2.06526	1	1	138	7	7	7	7	1	0	0	0	0	2	2.06526	7	Schisto_mansoni.Chr_4	9647701	9648014	1.2225	1	1	138	5	5	4	4
Smp_206250	-1.24356	0.631795		0.556876	1	1	1089	17	17	17	17	1	0	0	0	0	1	0.556876	1	Schisto_mansoni.SC_1929	2194	3282	0.523426	1	1	1089	14	14	14	14	1	0	0	0	0	1	0.523426	1	Schisto_mansoni.SC_1929	2194	3282	0.852049	1	1	1089	22	22	22	22
Smp_203620	-1.2429	0.151189		3.63675	1	1	873	17	89	17	89	0.191011	0	0	0	0	1	3.63675	8	Schisto_mansoni.Chr_W	29012318	29013190	4.43062	1	1	873	19	95	19	95	0.2	0	0	0	0	1	4.43062	9	Schisto_mansoni.Chr_W	29012318	29013190	5.07277	1	1	873	21	105	21	105
Smp_138710	-1.2429	0.16978	hypothetical protein	15.8546	1	1	288	276	276	128	128	1	0	0	24	24	2	15.8546	47	Schisto_mansoni.Chr_4	19481405	19482548	19.9334	1	1	288	276	276	141	141	1	0	0	22	22	2	19.9334	49	Schisto_mansoni.Chr_4	19481405	19482548	18.0128	1	1	288	256	256	123	123
Smp_051000	-1.24132	0.0135742		8.15076	1	1	2696	947	1000	568	616	0.922078	157	157	25	25	14	8.15076	20	Schisto_mansoni.Chr_6	14218846	14286149	8.38162	1	1	2696	866	917	512	555	0.922523	144	144	16	16	14	8.38162	17	Schisto_mansoni.Chr_6	14218846	14286149	7.58738	1	1	2696	719	757	449	485
Smp_151150	-1.24076	0.467764	arabinogalactan-protein, putative	0.39345	1	1	1632	22	22	18	18	1	0	0	3	3	4	0.39345	0	Schisto_mansoni.SC_0113	1069264	1076720	0.374219	1	1	1632	17	17	15	15	1	0	0	0	0	4	0.374219	0	Schisto_mansoni.SC_0113	1069264	1076720	0.387651	1	1	1632	18	18	15	15
Smp_201310	-1.24069	0.298331		8.54661	1	1	384	92	92	92	92	1	0	0	0	0	1	8.54661	0	Schisto_mansoni.Chr_1.unplaced.SC_0122	502042	502425	11.8752	1	1	384	112	112	112	112	1	0	0	0	0	1	11.8752	0	Schisto_mansoni.Chr_1.unplaced.SC_0122	502042	502425	10.3244	1	1	384	94	94	94	94
Smp_136600	-1.24023	0.329579		1.66162	1	1	687	2292	11246	32	32	1	0	0	18	18	4	1.66162	0	Schisto_mansoni.SC_0186	440053	473973	2.48913	1	1	687	2154	11397	42	42	1	0	0	24	24	4	2.48913	0	Schisto_mansoni.SC_0186	440053	473973	3.00822	1	1	687	2078	10960	49	49
Smp_162890	-1.23987	0.395986	rotamase, putative	49.3254	1	1	405	561	561	560	560	1	102	102	140	140	3	49.3254	137	Schisto_mansoni.Chr_W	56283458	56284602	38.805	1	1	405	387	387	386	386	1	70	70	99	99	3	38.805	93	Schisto_mansoni.Chr_W	56283458	56284602	76.1258	1	1	405	733	733	731	731
Smp_150450	-1.23947	0.0137232	hypothetical protein	5.8866	1	1	303	50	50	50	50	1	1	1	10	10	2	5.8866	18	Schisto_mansoni.Chr_1	27625205	27628786	6.85303	1	1	303	51	51	51	51	1	1	1	7	7	2	6.85303	18	Schisto_mansoni.Chr_1	27625205	27628786	6.40302	1	1	303	46	46	46	46
Smp_055890	-1.23834	0.00103253	ribonucleoside-diphosphate reductase small chain, putative	69.0372	1	1	1159	2243	2243	2243	2243	1	476	476	18	18	4	69.0372	212	Schisto_mansoni.SC_0258	29412	30679	72.9288	1	1	1159	2076	2076	2076	2076	1	457	457	17	17	4	72.9288	192	Schisto_mansoni.SC_0258	29412	30679	73.5813	1	1	1159	2022	2022	2022	2022
Smp_077920	-1.2382	0.760633		0.103801	1	1	1031	3	3	3	3	1	0	0	0	0	1	0.103801	0	Schisto_mansoni.Chr_3.unplaced.SC_0044	414976	416006	0.0394908	1	1	1031	1	1	1	1	1	0	0	0	0	1	0.0394908	0	Schisto_mansoni.Chr_3.unplaced.SC_0044	414976	416006	0.0409083	1	1	1031	1	1	1	1
Smp_042150	-1.23819	0.266182	Dynein light chain 1, cytoplasmic, putative	38.9065	1	1	1048	1228	1542	1143	1143	1	529	529	16	16	5	38.9065	128	Schisto_mansoni.Chr_4	22653010	22667664	35.4314	1	1	1048	988	1239	912	912	1	472	472	8	8	5	35.4314	89	Schisto_mansoni.Chr_4	22653010	22667664	27.5676	1	1	1048	731	944	685	685
Smp_038410	-1.23793	0.053129	hypothetical protein	40.2171	1	1	471	531	531	531	531	1	0	0	0	0	1	40.2171	101	Schisto_mansoni.Chr_W	2585189	2585659	31.6384	1	1	471	366	366	366	366	1	0	0	0	0	1	31.6384	67	Schisto_mansoni.Chr_W	2585189	2585659	34.9232	1	1	471	390	390	390	390
Smp_105080	-1.23765	0.145092	endonuclease related	9.90912	1	1	1008	438	467	280	280	1	97	97	14	14	5	9.90912	29	Schisto_mansoni.SC_0206	29386	38641	13.4101	1	1	1008	504	521	332	332	1	120	120	19	19	5	13.4101	34	Schisto_mansoni.SC_0206	29386	38641	10.6278	1	1	1008	386	401	254	254
Smp_147970	-1.23708	0.0218763	kif1, putative	4.72052	2	2	1791	628	639	237	237	1	100	100	61	61	16	4.72052	11	Schisto_mansoni.Chr_1	48703694	48728727	4.81942	2	2	1791	576	588	212	212	1	83	83	53	53	16	4.81942	11	Schisto_mansoni.Chr_1	48703694	48728727	5.53404	2	2	1791	581	591	235	235
Smp_171710	-1.23643	0.000170917	structural maintenance of chromosomes smc2, putative	18.2372	1	1	3605	2711	2742	1843	1843	1	728	728	34	34	17	18.2372	52	Schisto_mansoni.Chr_W	4960600	4996746	17.5058	1	1	3605	2369	2391	1550	1550	1	609	609	20	20	17	17.5058	46	Schisto_mansoni.Chr_W	4960600	4996746	17.6778	1	1	3605	2342	2358	1511	1511
Smp_018010	-1.23619	0.0756218	hypothetical protein	4.62527	1	1	3918	531	531	508	508	1	71	71	0	0	5	4.62527	13	Schisto_mansoni.Chr_W	32977857	32991754	4.27103	1	1	3918	430	430	411	411	1	51	51	0	0	5	4.27103	10	Schisto_mansoni.Chr_W	32977857	32991754	3.93991	1	1	3918	378	378	366	366
Smp_042090	-1.23567	0.0179088	60S ribosomal protein L10a, putative	232.246	2	2	1197	7815	8043	7791	7793	0.999743	3142	3142	40	41	7	232.246	424	Schisto_mansoni.Chr_4	22427799	22436714	244.971	2	2	1197	7217	7437	7196	7202	0.999167	2870	2870	29	31	7	244.971	401	Schisto_mansoni.Chr_4	22427799	22436714	270.782	2	2	1197	7690	7917	7682	7685
Smp_136270	-1.23546	0.00180701	2-oxoglutarate and iron-dependent oxygenase domain-containing protein	10.6567	1	1	2370	797	812	708	708	1	305	305	6	6	10	10.6567	32	Schisto_mansoni.Chr_5	173321	202466	10.445	1	1	2370	719	732	608	608	1	262	262	7	7	10	10.445	27	Schisto_mansoni.Chr_5	173321	202466	11.247	1	1	2370	717	726	632	632
Smp_166100	-1.23516	0.564391		0.596075	1	1	778	13	13	13	13	1	0	0	0	0	1	0.596075	1	Schisto_mansoni.Chr_1.unplaced.SC_0135	458733	459510	0.261665	1	1	778	5	5	5	5	1	0	0	0	0	1	0.261665	1	Schisto_mansoni.Chr_1.unplaced.SC_0135	458733	459510	0.704747	1	1	778	13	13	13	13
Smp_040990	-1.23504	0.190969		7.08062	1	1	529	105	105	105	105	1	30	30	3	3	2	7.08062	19	Schisto_mansoni.Chr_1	41627314	41627883	9.46683	1	1	529	123	123	123	123	1	34	34	6	6	2	9.46683	26	Schisto_mansoni.Chr_1	41627314	41627883	10.4444	1	1	529	131	131	131	131
Smp_141570	-1.23457	0.401978	twik family of potassium channels-related	2.7047	1	1	1464	150	152	111	111	1	24	24	2	2	4	2.7047	7	Schisto_mansoni.Chr_4	182127	201518	2.78108	1	1	1464	127	128	100	100	1	18	18	2	2	4	2.78108	6	Schisto_mansoni.Chr_4	182127	201518	4.63825	1	1	1464	193	194	161	161
Smp_202320	-1.2345	0.0968916		5.46983	1	1	300	72	76	44	46	0.956522	13	13	14	15	2	5.46983	13	Schisto_mansoni.Chr_3.unplaced.SC_0077	800846	802035	6.51441	1	1	300	64	66	48	48	1	11	11	17	17	2	6.51441	13	Schisto_mansoni.Chr_3.unplaced.SC_0077	800846	802035	6.18587	1	1	300	51	52	43	44
Smp_126290	-1.23446	0.56053		2.52232	1	1	1683	133	134	119	119	1	11	11	0	0	2	2.52232	7	Schisto_mansoni.Chr_W	8361239	8386344	1.35475	1	1	1683	69	69	56	56	1	6	6	0	0	2	1.35475	3	Schisto_mansoni.Chr_W	8361239	8386344	4.0347	1	1	1683	174	177	161	161
Smp_108320	-1.23419	0.860778		0.0404454	1	1	882	0	1	0	1	0	0	0	0	0	1	0.0404454	0	Schisto_mansoni.SC_0148	55056	55937	0	1	0	882	0	0	0	0	#NUM!	0	0	0	0	1	0	0	Schisto_mansoni.SC_0148	55056	55937	0.0956381	1	1	882	0	2	0	2
Smp_194870	-1.23419	0.860778	histone H4, putative	0.114336	1	1	312	0	1	0	1	0	0	0	0	0	1	0.114336	0	Schisto_mansoni.Chr_1	11538280	11538591	0	1	0	312	0	0	0	0	#NUM!	0	0	0	0	1	0	0	Schisto_mansoni.Chr_1	11538280	11538591	0.270362	1	1	312	1	2	1	2
Smp_131990	-1.23414	3.76364e-05	growth arrest-specific 2-related	20.1401	1	1	2586	1924	1927	1460	1460	1	96	96	108	108	6	20.1401	57	Schisto_mansoni.Chr_W	32386592	32416199	19.6175	1	1	2586	1646	1648	1246	1246	1	103	103	73	73	6	19.6175	46	Schisto_mansoni.Chr_W	32386592	32416199	20.0607	1	1	2586	1478	1478	1230	1230
Smp_150200	-1.23403	0.00617846	mannosyltransferase, putative	14.4058	1	1	1305	591	591	527	527	1	299	299	14	14	9	14.4058	41	Schisto_mansoni.Chr_3	14132957	14139778	14.5077	1	1	1305	530	530	465	465	1	242	242	14	14	9	14.5077	38	Schisto_mansoni.Chr_3	14132957	14139778	15.1577	1	1	1305	507	507	469	469
Smp_195040	-1.2337	0.00130758	fimbrin, putative	407.029	1	1	378	4313	4313	4313	4313	1	0	0	0	0	1	407.029	1298.5	Schisto_mansoni.SC_0041	164548	164925	394.01	1	1	378	3658	3658	3658	3658	1	0	0	0	0	1	394.01	1087.5	Schisto_mansoni.SC_0041	164548	164925	395.767	1	1	378	3547	3547	3547	3547
Smp_013570	-1.23365	0.120811		7.48153	1	1	987	207	207	207	207	1	0	0	0	0	1	7.48153	23	Schisto_mansoni.Chr_3	7918119	7919105	6.3527	1	1	987	154	154	154	154	1	0	0	0	0	1	6.3527	16	Schisto_mansoni.Chr_3	7918119	7919105	7.13623	1	1	987	167	167	167	167
Smp_168220	-1.23357	0.0806887	protein regulator of cytokinesis 1 prc1, putative	6.32497	1	1	564	100	100	100	100	1	25	25	1	1	2	6.32497	19	Schisto_mansoni.Chr_3	18158613	18159208	7.29117	1	1	564	101	101	101	101	1	19	19	0	0	2	7.29117	20	Schisto_mansoni.Chr_3	18158613	18159208	5.83291	1	1	564	78	78	78	78
Smp_114130	-1.23352	0.0671583		35.983	1	1	345	336	348	336	348	0.965517	149	157	90	94	3	35.983	104	Schisto_mansoni.SC_0468	13570	14009	44.1375	1	1	345	359	374	359	374	0.959893	141	148	99	103	3	44.1375	104	Schisto_mansoni.SC_0468	13570	14009	39.4869	1	1	345	315	323	315	323
Smp_013310	-1.23321	0.0916503	hypothetical protein	63.954	1	1	222	554	615	398	398	1	228	228	1	1	2	63.954	184	Schisto_mansoni.Chr_3	9071586	9090033	56.6709	1	1	222	434	483	309	309	1	191	191	2	2	2	56.6709	144	Schisto_mansoni.Chr_3	9071586	9090033	48.4459	1	1	222	380	428	255	255
Smp_206260	-1.23281	0.821202		0.420918	1	1	339	4	4	4	4	1	0	0	0	0	1	0.420918	1	Schisto_mansoni.SC_1938	1533	1871	0.240207	1	1	339	2	2	2	2	1	0	0	0	0	1	0.240207	1	Schisto_mansoni.SC_1938	1533	1871	0	1	0	339	0	0	0	0
Smp_080650	-1.23276	0.251762	hypothetical protein	1.58206	1	1	699	66	66	31	31	1	13	13	11	11	6	1.58206	3	Schisto_mansoni.SC_0156	84965	100581	1.57268	1	1	699	49	50	27	27	1	13	13	5	5	6	1.57268	4	Schisto_mansoni.SC_0156	84965	100581	1.14643	1	1	699	32	33	19	19
Smp_171720	-1.23267	0.000470608	lipid phosphate phosphatase-related	74.6785	1	1	974	3269	3409	2039	2039	1	1363	1363	22	22	9	74.6785	204	Schisto_mansoni.Chr_4	16862328	16898436	78.5458	1	1	974	2926	3037	1879	1879	1	1253	1253	28	28	9	78.5458	190	Schisto_mansoni.Chr_4	16862328	16898436	77.5977	1	1	974	2601	2682	1792	1792
Smp_169250	-1.23265	0.00310091		53.6894	1	1	693	1256	1256	1043	1043	1	661	661	14	14	5	53.6894	160	Schisto_mansoni.Chr_3	6191078	6202655	58.5756	1	1	693	1239	1239	997	997	1	640	640	11	11	5	58.5756	153	Schisto_mansoni.Chr_3	6191078	6202655	54.4703	1	1	693	1104	1104	895	895
Smp_040350	-1.23181	0.000369513	rfx5, putative	2.76384	1	1	3330	286	286	258	258	1	68	68	7	7	12	2.76384	7	Schisto_mansoni.Chr_1	60681334	60698423	2.77547	1	1	3330	248	248	227	227	1	70	70	6	6	12	2.77547	7	Schisto_mansoni.Chr_1	60681334	60698423	2.73577	1	1	3330	237	237	216	216
Smp_093160	-1.23138	0.0155445	STARP antigen , putative	9.0919	1	1	1797	344	477	344	458	0.751092	344	345	0	1	5	9.0919	10	Schisto_mansoni.SC_0173	63111	81759	8.38318	1	1	1797	291	386	291	370	0.786486	291	293	0	1	5	8.38318	7	Schisto_mansoni.SC_0173	63111	81759	8.00343	1	1	1797	278	350	278	341
Smp_153120	-1.23045	0.551802	hypothetical protein	9.36862	1	1	4950	1762	1813	1300	1300	1	168	168	20	20	9	9.36862	27	Schisto_mansoni.SC_0173	225288	260357	5.75768	1	1	4950	1038	1072	700	700	1	80	80	12	12	9	5.75768	14	Schisto_mansoni.SC_0173	225288	260357	9.16805	1	1	4950	1531	1587	1076	1076
Smp_158120	-1.23033	0.0110318	hypothetical protein	1.69871	1	1	1071	126	128	51	51	1	1	1	14	14	5	1.69871	4	Schisto_mansoni.Chr_1.unplaced.SC_0094	496428	532897	1.78675	1	1	1071	98	100	47	47	1	0	0	12	12	5	1.78675	3	Schisto_mansoni.Chr_1.unplaced.SC_0094	496428	532897	1.92964	1	1	1071	103	106	49	49
Smp_005060	-1.22974	0.00107225	hypothetical protein	59.3417	1	1	526	884	884	875	875	1	113	113	0	0	2	59.3417	219.5	Schisto_mansoni.Chr_1	32550332	32552568	60.0663	1	1	526	784	784	776	776	1	105	105	0	0	2	60.0663	196	Schisto_mansoni.Chr_1	32550332	32552568	62.4628	1	1	526	788	788	779	779
Smp_088420	-1.22972	0.00658658	hypothetical protein	114.624	1	1	394	1372	1372	1266	1266	1	835	835	22	22	3	114.624	357	Schisto_mansoni.Chr_1	45577320	45579888	114.808	1	1	394	1222	1222	1111	1111	1	746	746	30	30	3	114.808	287.5	Schisto_mansoni.Chr_1	45577320	45579888	123.853	1	1	394	1260	1260	1157	1157
Smp_157450	-1.22967	0.579327		2.67546	1	1	360	23	27	23	27	0.851852	23	23	0	0	3	2.67546	3	Schisto_mansoni.SC_1406	1861	2288	2.94053	1	1	360	22	26	22	26	0.846154	22	24	0	0	3	2.94053	3	Schisto_mansoni.SC_1406	1861	2288	6.20931	1	1	360	41	53	41	53
Smp_145800	-1.22938	0.000344985	U3 small nucleolar ribonucleoprotein protein imp4, putative	35.2598	1	1	950	1011	1011	939	939	1	235	235	168	168	4	35.2598	93	Schisto_mansoni.SC_0194	35836	39287	36.515	1	1	950	908	908	852	852	1	232	232	146	146	4	36.515	82	Schisto_mansoni.SC_0194	35836	39287	37.2484	1	1	950	907	907	839	839
Smp_095520	-1.22935	0.00558212	dynein light chain, putative	1064.65	1	1	599	17990	17990	17877	17877	1	6081	6081	21	21	2	1064.65	2408	Schisto_mansoni.Chr_1	44164618	44165960	1119.77	1	1	599	16554	16554	16474	16474	1	5605	5605	31	31	2	1119.77	2232	Schisto_mansoni.Chr_1	44164618	44165960	1096.45	1	1	599	15660	15660	15572	15572
Smp_203130	-1.22888	0.000129945		776.108	1	1	558	10195	12140	10195	12140	0.839786	0	0	0	0	1	776.108	2438	Schisto_mansoni.Chr_6	4189448	4190005	758.847	1	1	558	8778	10400	8778	10400	0.844038	0	0	0	0	1	758.847	2109	Schisto_mansoni.Chr_6	4189448	4190005	790.694	1	1	558	8803	10461	8803	10461
Smp_000550	-1.22857	0.5457		1.15074	1	1	186	283	286	6	6	1	0	0	3	3	2	1.15074	3	Schisto_mansoni.SC_0113	453890	462699	1.53229	1	1	186	237	237	7	7	1	0	0	6	6	2	1.53229	1	Schisto_mansoni.SC_0113	453890	462699	0.680265	1	0	186	174	174	3	3
Smp_180350	-1.22819	0.131259	Rhodopsin	3.85989	1	1	573	75	75	62	62	1	30	30	1	1	3	3.85989	11	Schisto_mansoni.Chr_W	45158242	45165816	3.69491	1	1	573	58	58	52	52	1	16	16	2	2	3	3.69491	9	Schisto_mansoni.Chr_W	45158242	45165816	3.75392	1	1	573	59	59	51	51
Smp_131430	-1.22788	0.0681554	steroid dehydrogenase, putative	53.8928	1	1	558	719	1014	691	843	0.819692	181	182	145	163	3	53.8928	175	Schisto_mansoni.Chr_6	17798780	17806805	66.3991	1	1	558	746	1061	734	910	0.806593	168	170	175	195	3	66.3991	174.5	Schisto_mansoni.Chr_6	17798780	17806805	54.1188	1	1	558	606	844	586	716
Smp_201070	-1.22749	0.640312		0.314575	1	1	567	5	5	5	5	1	0	0	0	0	1	0.314575	1	Schisto_mansoni.Chr_1	44507096	44507662	0.861694	1	1	567	12	12	12	12	1	0	0	0	0	1	0.861694	2	Schisto_mansoni.Chr_1	44507096	44507662	0.669467	1	1	567	9	9	9	9
Smp_032490	-1.22732	0.0628215	tropomyosin, putative	7.84845	1	1	1659	512	532	365	365	1	207	207	3	3	10	7.84845	22	Schisto_mansoni.Chr_W	50984813	51022048	7.01899	1	1	1659	418	433	286	286	1	165	165	3	3	10	7.01899	18	Schisto_mansoni.Chr_W	50984813	51022048	8.97425	1	1	1659	468	481	353	353
Smp_044280	-1.22722	0.00837555	fibrillarin, putative	46.4597	2	2	1217	1585	1585	1585	1585	1	346	346	1	1	6	46.4597	140	Schisto_mansoni.Chr_2	27478805	27480065	45.7668	2	2	1217	1368	1368	1368	1368	1	315	315	0	0	6	45.7668	122	Schisto_mansoni.Chr_2	27478805	27480065	48.6224	2	2	1217	1403	1403	1403	1403
Smp_154370	-1.2264	0.262787	shippo-1-related	3.3114	1	1	711	106	106	66	66	1	26	26	4	4	4	3.3114	9	Schisto_mansoni.Chr_W	24147259	24151109	2.34784	1	1	711	73	73	41	41	1	12	12	3	3	4	2.34784	6	Schisto_mansoni.Chr_W	24147259	24151109	3.02531	1	1	711	86	86	51	51
Smp_110400	-1.22623	0.325639	hypothetical protein	138.396	2	2	872	3898	3898	3383	3383	1	3117	3117	138	138	6	138.396	24	Schisto_mansoni.SC_0828	3019	6016	162.954	2	2	872	4016	4016	3490	3490	1	3212	3212	145	145	6	162.954	27	Schisto_mansoni.SC_0828	3019	6016	164.836	2	2	872	3750	3750	3408	3408
Smp_007190	-1.22583	0.00110657	RNA lariat debranching enzyme, putative	36.4149	1	1	2067	2190	2193	2110	2110	1	382	382	26	26	5	36.4149	110	Schisto_mansoni.Chr_1	30171516	30180223	34.2739	1	1	2067	1816	1817	1740	1740	1	295	295	15	15	5	34.2739	87	Schisto_mansoni.Chr_1	30171516	30180223	36.2999	1	1	2067	1844	1844	1779	1779
Smp_202340	-1.22575	0.201753		27.3492	1	1	240	154	184	154	184	0.836957	0	0	0	0	1	27.3492	27	Schisto_mansoni.Chr_3.unplaced.SC_0083	1481752	1481991	30.8756	1	1	240	157	182	157	182	0.862637	0	0	0	0	1	30.8756	30.5	Schisto_mansoni.Chr_3.unplaced.SC_0083	1481752	1481991	21.0882	1	1	240	113	120	113	120
Smp_157030	-1.22555	0.874853		0	1	0	819	0	0	0	0	#NUM!	0	0	0	0	3	0	0	Schisto_mansoni.Chr_W	1772218	1773063	0.198852	1	1	819	3	4	3	4	0.75	0	0	0	1	3	0.198852	0	Schisto_mansoni.Chr_W	1772218	1773063	0	1	0	819	0	0	0	0
Smp_093320	-1.22552	0.0348183	ribosome biogenesis protein Nop10, putative	103.36	1	1	195	657	1567	565	565	1	353	353	2	2	2	103.36	285	Schisto_mansoni.SC_0299	8795	17375	120.266	1	1	195	652	1523	576	576	1	367	367	1	1	2	120.266	292	Schisto_mansoni.SC_0299	8795	17375	123.934	1	1	195	662	1621	573	573
Smp_009030	-1.22509	0.0146784	ribonucleoside-diphosphate reductase, alpha subunit, putative	29.8409	1	1	2514	2159	2159	2103	2103	1	728	728	40	40	10	29.8409	79.5	Schisto_mansoni.Chr_4	8062178	8069763	29.7184	1	1	2514	1897	1897	1835	1835	1	606	606	47	47	10	29.7184	68	Schisto_mansoni.Chr_4	8062178	8069763	32.3621	1	1	2514	1969	1969	1929	1929
Smp_118570	-1.22499	0.00459977		66.864	1	1	987	1191	1850	1191	1850	0.643784	1179	1179	0	110	3	66.864	69	Schisto_mansoni.SC_0080	906400	907521	72.3961	1	1	987	1141	1755	1141	1755	0.650142	1130	1135	0	103	3	72.3961	63	Schisto_mansoni.SC_0080	906400	907521	68.9266	1	1	987	1050	1613	1050	1613
Smp_093820	-1.22496	0.00490133	glutamate dehydrogenase, putative	138.597	1	1	1490	5978	6083	5789	5789	1	2680	2680	45	45	8	138.597	389	Schisto_mansoni.SC_0136	313471	328850	134.469	1	1	1490	5097	5190	4921	4921	1	2205	2205	35	35	8	134.469	323	Schisto_mansoni.SC_0136	313471	328850	148.665	1	1	1490	5371	5470	5252	5252
Smp_120740	-1.22435	0.460375	hypothetical protein	20.6527	1	1	1254	729	729	726	726	1	407	407	12	12	10	20.6527	59	Schisto_mansoni.SC_0301	70240	73679	15.0652	1	1	1254	466	466	464	464	1	265	265	8	8	10	15.0652	39	Schisto_mansoni.SC_0301	70240	73679	18.3303	1	1	1254	547	547	545	545
Smp_137030	-1.22402	0.00480727	hypothetical protein	30.6891	1	1	408	2362	2385	328	351	0.934473	1	1	253	253	3	30.6891	16	Schisto_mansoni.Chr_4	6387544	6392877	31.2348	1	1	408	1877	1905	286	313	0.913738	3	3	214	214	3	31.2348	16	Schisto_mansoni.Chr_4	6387544	6392877	30.2885	1	1	408	1629	1651	271	293
Smp_036470	-1.22391	0.0859128	oxalate:formate antiporter, putative	10.4441	1	1	789	266	266	231	231	1	148	148	13	13	6	10.4441	31	Schisto_mansoni.Chr_W	11559354	11565019	9.34021	1	1	789	210	210	181	181	1	116	116	8	8	6	9.34021	25	Schisto_mansoni.Chr_W	11559354	11565019	11.0653	1	1	789	237	237	207	207
Smp_170650	-1.2239	0.627366	hypothetical protein	2.70249	1	1	264	20	20	20	20	1	0	0	0	0	1	2.70249	6	Schisto_mansoni.Chr_4	30225663	30225926	1.38801	1	1	264	9	9	9	9	1	0	0	0	0	1	1.38801	4	Schisto_mansoni.Chr_4	30225663	30225926	1.11831	1	1	264	7	7	7	7
Smp_053300	-1.22382	0.163024	histone H4, putative	32.8438	1	1	517	551	898	307	476	0.644958	0	0	201	201	3	32.8438	70	Schisto_mansoni.Chr_1	11553719	11557595	36.2262	1	1	517	479	811	279	460	0.606522	0	0	195	195	3	36.2262	70	Schisto_mansoni.Chr_1	11553719	11557595	38.179	1	1	517	552	869	292	468
Smp_137020	-1.22361	0.00105016	phosphatidylinositol transfer protein	110.801	1	1	962	3002	3002	2988	2988	1	1723	1723	46	46	6	110.801	329	Schisto_mansoni.Chr_4	6374475	6379691	103.481	1	1	962	2465	2465	2445	2445	1	1406	1406	39	39	6	103.481	275	Schisto_mansoni.Chr_4	6374475	6379691	109.913	1	1	962	2515	2515	2507	2507
Smp_200090	-1.22314	0.579154		16.0877	1	1	153	69	69	69	69	1	0	0	0	0	1	16.0877	51	Schisto_mansoni.Chr_1	57476324	57476476	7.98334	1	1	153	30	30	30	30	1	0	0	0	0	1	7.98334	21	Schisto_mansoni.Chr_1	57476324	57476476	6.61591	1	1	153	24	24	24	24
Smp_113660	-1.22282	0.534663	cleavage and polyadenylation specificity factor, putative	24.1033	1	1	629	311	425	311	425	0.731765	113	114	1	1	3	24.1033	72	Schisto_mansoni.SC_0349	2274	2981	20.3252	1	1	629	240	314	240	314	0.764331	68	69	3	3	3	20.3252	50	Schisto_mansoni.SC_0349	2274	2981	31.3809	1	1	629	347	468	347	468
Smp_015480	-1.22264	0.0326185	hypothetical protein	158.32	1	1	2303	6649	10246	6626	10221	0.648273	532	534	1	1	2	158.32	482	Schisto_mansoni.Chr_W	20831209	20835042	145.711	1	1	2303	5380	8251	5372	8242	0.651784	443	443	0	0	2	145.711	387	Schisto_mansoni.Chr_W	20831209	20835042	148.725	1	1	2303	5252	8133	5241	8121
Smp_212420	-1.22209	0.29277	Dab2-interacting protein-like	11.2732	1	1	693	190	227	190	219	0.86758	181	181	9	10	4	11.2732	9	Schisto_mansoni.SC_0173	29050	54022	7.9315	1	1	693	117	140	117	135	0.866667	115	115	2	2	4	7.9315	7	Schisto_mansoni.SC_0173	29050	54022	7.54672	1	1	693	111	128	111	124
Smp_099690	-1.2218	0.00732117	RER1 protein, putative	49.6269	1	1	951	1370	1370	1323	1323	1	865	865	17	17	6	49.6269	162	Schisto_mansoni.Chr_2	10163405	10167474	55.143	1	1	951	1347	1347	1288	1288	1	842	842	20	20	6	55.143	159	Schisto_mansoni.Chr_2	10163405	10167474	53.7517	1	1	951	1259	1259	1212	1212
Smp_163720	-1.22165	0.00286202	endophilin B1, putative	375.971	1	1	1192	14309	14399	12563	12563	1	5759	5759	309	309	8	375.971	1275.5	Schisto_mansoni.Chr_W	59182233	59208055	378.664	1	1	1192	12709	12785	11086	11086	1	4948	4948	289	289	8	378.664	1040.5	Schisto_mansoni.Chr_W	59182233	59208055	409.133	1	1	1192	13172	13247	11563	11563
Smp_103380	-1.22127	0.0227187	hypothetical protein	26.3788	1	1	261	193	193	193	193	1	0	0	0	0	1	26.3788	60	Schisto_mansoni.Chr_5	9346358	9346618	26.0514	1	1	261	167	167	167	167	1	0	0	0	0	1	26.0514	44	Schisto_mansoni.Chr_5	9346358	9346618	28.6024	1	1	261	177	177	177	177
Smp_040130	-1.22103	0.0199654	cyclophilin	1679.23	1	1	615	28950	28950	28950	28950	1	7488	7488	20	20	2	1679.23	5526	Schisto_mansoni.Chr_5	7964642	7965291	1677.66	1	1	615	25341	25341	25341	25341	1	6511	6511	20	20	2	1677.66	4783	Schisto_mansoni.Chr_5	7964642	7965291	1927.5	1	1	615	28106	28106	28106	28106
Smp_068920	-1.22095	0.000823273	centromere/microtubule binding protein cbf5, putative	84.6739	1	1	1001	2587	3098	2241	2376	0.943182	1131	1148	99	213	9	84.6739	185	Schisto_mansoni.Chr_W	10109307	10114542	87.7346	1	1	1001	2323	2848	2032	2157	0.942049	1092	1109	78	182	9	87.7346	163	Schisto_mansoni.Chr_W	10109307	10114542	86.0382	1	1	1001	2192	2640	1923	2042
Smp_110480	-1.2204	0.0931345		26.5876	1	1	267	199	199	199	199	1	0	0	0	0	1	26.5876	79	Schisto_mansoni.SC_0037	1553484	1553750	28.5158	1	1	267	187	187	187	187	1	0	0	0	0	1	28.5158	75	Schisto_mansoni.SC_0037	1553484	1553750	22.5889	1	1	267	143	143	143	143
Smp_137110	-1.22022	0.00992774	phd finger protein, putative	12.9839	1	1	1632	778	781	594	594	1	92	92	136	136	5	12.9839	24	Schisto_mansoni.Chr_3.unplaced.SC_0233	63969	72778	13.6715	1	1	1632	756	762	548	548	1	63	63	132	132	5	13.6715	11	Schisto_mansoni.Chr_3.unplaced.SC_0233	63969	72778	12.4048	1	1	1632	636	638	480	480
Smp_132220	-1.22012	0.476529	G-protein coupled receptor fragment, putative	0.961767	1	1	408	11	11	11	11	1	0	0	0	0	1	0.961767	2	Schisto_mansoni.Chr_W	45297582	45297989	1.59667	1	1	408	16	16	16	16	1	0	0	0	0	1	1.59667	4	Schisto_mansoni.Chr_W	45297582	45297989	0.826989	1	1	408	8	8	8	8
Smp_210890	-1.22011	0.0551046	lethal giant larvae homolog 2	37.006	1	1	990	794	1132	794	1027	0.773126	794	797	0	16	8	37.006	94	Schisto_mansoni.Chr_W	35967326	35977835	38.0007	1	1	990	704	1015	704	924	0.761905	704	706	0	7	8	38.0007	87.5	Schisto_mansoni.Chr_W	35967326	35977835	44.9882	1	1	990	802	1148	802	1056
Smp_032750	-1.219	0.513593	GTP-binding protein (I) alpha-2 subunit, gnai2, putative	0.660608	1	1	648	12	12	12	12	1	0	0	0	0	1	0.660608	2	Schisto_mansoni.Chr_2	939650	940297	0.439823	1	1	648	7	7	7	7	1	0	0	0	0	1	0.439823	1	Schisto_mansoni.Chr_2	939650	940297	1.04139	1	1	648	16	16	16	16
Smp_125810	-1.21888	0.0468242	zinc finger protein, putative	41.2644	1	1	504	2296	2445	583	583	1	193	193	62	62	4	41.2644	139	Schisto_mansoni.Chr_1	24351866	24376514	34.1716	1	1	504	1752	1887	423	423	1	126	126	48	48	4	34.1716	104	Schisto_mansoni.Chr_1	24351866	24376514	35.5654	1	1	504	1648	1747	425	425
Smp_056370	-1.21822	0.00459122	pbs lyase heat-like protein	42.6366	1	1	1337	1691	1692	1598	1598	1	113	113	7	7	2	42.6366	124	Schisto_mansoni.Chr_W	23007680	23016044	45.1611	1	1	1337	1572	1574	1483	1483	1	116	116	7	7	2	45.1611	121	Schisto_mansoni.Chr_W	23007680	23016044	46.719	1	1	1337	1562	1563	1481	1481
Smp_145520	-1.2182	0.56443	Adrenoreceptor, putative	0.0938758	1	1	1140	2788	3716	3	3	1	0	0	0	0	2	0.0938758	0	Schisto_mansoni.Chr_4	13602495	13608755	0.0714299	1	1	1140	2622	3506	1	2	0.5	0	0	0	0	2	0.0714299	0	Schisto_mansoni.Chr_4	13602495	13608755	0.110991	1	1	1140	2491	3324	1	3
Smp_171870	-1.21819	0.000256661	synaptic vesicle 2-related protein-like	29.5949	1	1	2154	2701	3081	1787	1787	1	873	873	52	52	13	29.5949	98	Schisto_mansoni.Chr_W	16178486	16217133	30.2433	1	1	2154	2355	2668	1600	1600	1	757	757	65	65	13	30.2433	87	Schisto_mansoni.Chr_W	16178486	16217133	30.9372	1	1	2154	2297	2640	1580	1580
Smp_008400	-1.21818	0.0159715	adenosine kinase, putative	3.66124	1	1	1101	101	113	101	113	0.893805	0	12	12	12	3	3.66124	9	Schisto_mansoni.Chr_1	40422851	40424026	3.36519	1	1	1101	84	91	84	91	0.923077	0	7	7	7	3	3.36519	8	Schisto_mansoni.Chr_1	40422851	40424026	3.60089	1	1	1101	85	94	85	94
Smp_124370	-1.21808	0.0723943	cell adhesion molecule, putative	3.62774	1	1	2478	378	381	252	252	1	20	20	36	36	10	3.62774	2	Schisto_mansoni.Chr_2	18850824	18881111	3.17111	1	1	2478	295	299	193	193	1	19	19	22	22	10	3.17111	1	Schisto_mansoni.Chr_2	18850824	18881111	3.74448	1	1	2478	322	326	220	220
Smp_140710	-1.21795	0.161093	hypothetical protein	4.49536	1	1	492	228	239	62	62	1	0	0	8	8	2	4.49536	11	Schisto_mansoni.Chr_2	6984616	7006854	5.79279	1	1	492	229	236	70	70	1	0	0	7	7	2	5.79279	15	Schisto_mansoni.Chr_2	6984616	7006854	4.28622	1	1	492	136	143	50	50
Smp_115060	-1.21785	0.0407985	hypothetical protein	15.4793	1	1	507	136	228	136	220	0.618182	136	139	0	2	2	15.4793	29	Schisto_mansoni.Chr_6	18095185	18097573	17.1854	1	1	507	123	217	123	214	0.574766	123	125	0	0	2	17.1854	34	Schisto_mansoni.Chr_6	18095185	18097573	16.804	1	1	507	128	208	128	202
Smp_038240	-1.21765	0.0139944	alanyl-tRNA synthetase, putative	19.8131	1	1	3086	1813	1824	1714	1714	1	716	716	31	31	15	19.8131	58	Schisto_mansoni.Chr_W	2142239	2167221	19.0118	1	1	3086	1530	1534	1441	1441	1	616	616	27	27	15	19.0118	46	Schisto_mansoni.Chr_W	2142239	2167221	19.8308	1	1	3086	1525	1527	1451	1451
Smp_204720	-1.21757	0.0709026		10.8261	1	1	603	188	188	183	183	1	0	0	0	0	2	10.8261	36	Schisto_mansoni.SC_0147	379014	381409	9.31787	1	1	603	142	142	138	138	1	0	0	1	1	2	9.31787	26	Schisto_mansoni.SC_0147	379014	381409	10.002	1	1	603	144	144	143	143
Smp_158070	-1.21749	0.0270249	hypothetical protein	25.865	1	1	411	379	384	298	298	1	83	83	5	5	2	25.865	90	Schisto_mansoni.SC_0136	647658	652351	26.7471	1	1	411	336	343	270	270	1	76	76	4	4	2	26.7471	79	Schisto_mansoni.SC_0136	647658	652351	29.8621	1	1	411	350	355	291	291
Smp_168400	-1.21726	0.00388917	hypothetical protein	7.2177	1	1	944	292	304	191	191	1	114	114	20	20	7	7.2177	22	Schisto_mansoni.Chr_1	11665566	11683047	6.59894	1	1	944	239	246	153	153	1	84	84	24	24	7	6.59894	17	Schisto_mansoni.Chr_1	11665566	11683047	6.96983	1	1	944	225	238	156	156
Smp_037590	-1.21685	0.00689478	DNA replication licensing factor MCM3, putative	25.1346	1	1	2681	2205	2208	1889	1889	1	888	888	27	27	14	25.1346	70	Schisto_mansoni.Chr_2	4908879	4924440	23.691	1	1	2681	1787	1791	1560	1560	1	709	709	27	27	14	23.691	57	Schisto_mansoni.Chr_2	4908879	4924440	26.0201	1	1	2681	1867	1870	1654	1654
Smp_109340	-1.21679	0.464299	hypothetical protein	1.53668	1	1	975	15	42	15	42	0.357143	0	3	0	1	2	1.53668	4	Schisto_mansoni.Chr_4	4406263	4407286	1.12749	1	1	975	11	27	11	27	0.407407	0	2	0	0	2	1.12749	2	Schisto_mansoni.Chr_4	4406263	4407286	1.21122	1	1	975	11	28	11	28
Smp_046600	-1.21647	0.0021488	Actin-1, putative	318.025	1	1	1330	2994	11857	2994	11857	0.252509	0	0	0	0	1	318.025	1059	Schisto_mansoni.Chr_6	6381147	6382476	307.904	1	1	1330	2614	10058	2614	10058	0.259893	0	0	0	0	1	307.904	893	Schisto_mansoni.Chr_6	6381147	6382476	332.211	1	1	1330	2688	10476	2688	10476
Smp_133790	-1.2159	0.0205319	run and tbc1 domain containing, putative	19.9413	1	1	1932	1364	1373	1080	1080	1	488	488	64	64	11	19.9413	56	Schisto_mansoni.Chr_W	24500216	24526958	17.8076	1	1	1932	1053	1063	845	845	1	370	370	53	53	11	17.8076	45	Schisto_mansoni.Chr_W	24500216	24526958	17.2242	1	1	1932	976	983	789	789
Smp_178000	-1.21566	0.745121	hypothetical protein	0.218182	1	1	327	0	2	0	2	0	0	0	0	0	1	0.218182	1	Schisto_mansoni.Chr_1	49851503	49851829	0.249022	1	1	327	0	2	0	2	0	0	0	0	0	1	0.249022	1	Schisto_mansoni.Chr_1	49851503	49851829	0	1	0	327	0	0	0	0
Smp_002920	-1.21563	0.0280766	hypothetical protein	36.4123	2	2	1592	1944	1944	1625	1625	1	423	423	40	40	6	36.4123	121	Schisto_mansoni.Chr_6	2712094	2715746	35.6001	2	2	1592	1641	1641	1392	1392	1	372	372	40	40	6	35.6001	104	Schisto_mansoni.Chr_6	2712094	2715746	41.9645	2	2	1592	1866	1866	1584	1584
Smp_140720	-1.2154	0.0416375		8.10953	1	1	783	213	213	178	178	1	77	77	4	4	4	8.10953	24	Schisto_mansoni.Chr_2	7044838	7051119	8.78779	1	1	783	202	203	169	169	1	75	75	4	4	4	8.78779	23	Schisto_mansoni.Chr_2	7044838	7051119	8.3491	1	1	783	179	179	155	155
Smp_156530	-1.21453	0.0170946	peptidyl-glycine alpha-amidating monooxygenase, putative	32.3145	1	1	1827	1693	1702	1655	1655	1	367	367	185	185	6	32.3145	90	Schisto_mansoni.Chr_2	16706997	16730277	30.1519	1	1	1827	1397	1407	1353	1353	1	310	310	143	143	6	30.1519	74	Schisto_mansoni.Chr_2	16706997	16730277	29.8721	1	1	1827	1331	1339	1294	1294
Smp_129700	-1.21436	0.815441	protein-tyrosine sulfotransferase, putative	0	1	0	876	32	32	0	0	#NUM!	0	0	0	0	5	0	0	Schisto_mansoni.Chr_2.unplaced.SC_0120	643498	654986	0.232392	1	1	876	29	29	5	5	1	0	0	1	1	5	0.232392	0	Schisto_mansoni.Chr_2.unplaced.SC_0120	643498	654986	0.14444	1	1	876	19	19	3	3
Smp_169830	-1.21415	0.75319		0.191019	1	1	747	4	4	4	4	1	0	0	0	0	1	0.191019	0	Schisto_mansoni.Chr_3	16736024	16736770	0.490543	1	1	747	9	9	9	9	1	0	0	0	0	1	0.490543	1	Schisto_mansoni.Chr_3	16736024	16736770	0.0564611	1	1	747	1	1	1	1
Smp_202530	-1.21398	0.472018		0.389867	1	1	183	2	2	2	2	1	0	0	0	0	1	0.389867	2	Schisto_mansoni.Chr_4	16776435	16776617	0.444973	1	1	183	2	2	2	2	1	0	0	0	0	1	0.444973	1	Schisto_mansoni.Chr_4	16776435	16776617	0.230472	1	1	183	1	1	1	1
Smp_045010	-1.2134	0.00176291	22.6kDa tegument-associated antigen, putative	71.0764	1	1	795	1866	1874	1584	1584	1	502	502	10	10	3	71.0764	213	Schisto_mansoni.Chr_W	13820166	13832953	71.1873	1	1	795	1622	1624	1390	1390	1	451	451	11	11	3	71.1873	197	Schisto_mansoni.Chr_W	13820166	13832953	75.1748	1	1	795	1600	1602	1417	1417
Smp_100030	-1.21255	0.0687777	ribosome biogenesis protein BMS1, putative	6.71967	1	1	3594	719	721	677	677	1	111	111	19	19	9	6.71967	18	Schisto_mansoni.Chr_3	25758193	25775590	8.38318	1	1	3594	788	791	740	740	1	118	118	18	18	9	8.38318	20	Schisto_mansoni.Chr_3	25758193	25775590	8.28507	1	1	3594	731	735	706	706
Smp_032950	-1.21245	0.0765574	Calmodulin (CaM), putative	475.268	1	1	322	4290	4290	4290	4290	1	1379	1379	30	30	2	475.268	1575.5	Schisto_mansoni.Chr_W	15262895	15263298	497.937	1	1	322	3938	3938	3938	3938	1	1270	1270	29	29	2	497.937	1431.5	Schisto_mansoni.Chr_W	15262895	15263298	556.414	1	1	322	4248	4248	4248	4248
Smp_018580	-1.21221	0.0397396		9.99582	1	1	1920	590	593	538	538	1	113	113	15	15	7	9.99582	29	Schisto_mansoni.Chr_3	3383043	3395084	10.412	1	1	1920	530	532	491	491	1	94	94	17	17	7	10.412	26	Schisto_mansoni.Chr_3	3383043	3395084	8.76479	1	1	1920	439	443	399	399
Smp_199670	-1.21172	0.75575	cation transporting ATPase, putative	0.457344	1	1	234	7	7	3	3	1	1	1	2	2	3	0.457344	0	Schisto_mansoni.SC_0393	29448	29999	0.521988	1	1	234	9	9	3	3	1	2	2	1	1	3	0.521988	0	Schisto_mansoni.SC_0393	29448	29999	0.180241	1	0	234	3	3	1	1
Smp_157820	-1.21166	0.00898171	ataxia telangiectasia mutated (atm), putative	6.51937	1	1	9417	2688	2915	1721	1721	1	683	683	12	12	41	6.51937	0	Schisto_mansoni.Chr_W	34202059	34303409	6.60209	1	1	9417	2428	2633	1527	1527	1	598	598	1	1	41	6.60209	0	Schisto_mansoni.Chr_W	34202059	34303409	6.06423	1	1	9417	2311	2553	1354	1354
Smp_037230	-1.2116	0.00982909	fimbrin, putative	475.972	1	1	1885	25261	25261	25151	25151	1	2809	2809	1	1	3	475.972	1438	Schisto_mansoni.SC_0041	168293	182361	455.706	1	1	1885	21205	21207	21098	21098	1	2367	2367	4	4	3	455.706	1188	Schisto_mansoni.SC_0041	168293	182361	462.128	1	1	1885	20737	20737	20654	20654
Smp_086220	-1.2114	0.0533601	hypothetical protein	9.50694	2	2	1227	386	386	327	327	1	176	176	14	14	10	9.50694	29	Schisto_mansoni.Chr_2	17337619	17342837	9.49022	2	2	1227	334	334	286	286	1	135	135	24	24	10	9.49022	24	Schisto_mansoni.Chr_2	17337619	17342837	8.24967	2	2	1227	278	278	240	240
Smp_195120	-1.21117	0.339064	KRAB-A domain-containing protein	7.66538	1	1	4086	67	878	67	878	0.0763098	0	0	0	49	2	7.66538	19	Schisto_mansoni.SC_0037	1557954	1562102	5.31109	1	1	4086	41	533	41	533	0.0769231	0	0	0	25	2	5.31109	11	Schisto_mansoni.SC_0037	1557954	1562102	5.13012	1	1	4086	36	497	36	497
Smp_129140	-1.211	0.0497622	hypothetical protein	8.76885	2	2	1851	502	690	445	455	0.978022	119	120	27	28	6	8.76885	29	Schisto_mansoni.Chr_3	12971122	12982657	10.5802	2	2	1851	536	726	472	481	0.981289	117	117	28	30	6	10.5802	29	Schisto_mansoni.Chr_3	12971122	12982657	10.0485	2	2	1851	483	647	433	441
Smp_201810	-1.2104	0.0334689		22.759	1	1	279	187	187	178	178	1	68	68	29	29	2	22.759	52	Schisto_mansoni.Chr_2	24329854	24330264	24.3707	1	1	279	171	171	167	167	1	76	76	21	21	2	24.3707	50	Schisto_mansoni.Chr_2	24329854	24330264	24.943	1	1	279	169	169	165	165
Smp_042770	-1.21025	0.0148495	hypothetical protein	5.3669	1	1	3237	562	567	487	487	1	133	133	3	3	10	5.3669	15	Schisto_mansoni.Chr_4	12069988	12096009	5.52175	1	1	3237	506	512	439	439	1	119	119	5	5	10	5.52175	12	Schisto_mansoni.Chr_4	12069988	12096009	4.83394	1	1	3237	416	422	371	371
Smp_164260	-1.21008	0.00148641		8.55187	1	1	1485	435	442	356	356	1	45	45	53	53	5	8.55187	22	Schisto_mansoni.SC_0111	297356	323448	8.00592	1	1	1485	375	384	292	292	1	39	39	48	48	5	8.00592	20	Schisto_mansoni.SC_0111	297356	323448	8.43528	1	1	1485	349	354	297	297
Smp_073050	-1.20966	0.142488	hypothetical protein	22.1171	1	1	450	279	279	279	279	1	25	25	3	3	2	22.1171	69	Schisto_mansoni.Chr_1	25234490	25234974	24.7909	1	1	450	274	274	274	274	1	31	31	3	3	2	24.7909	64	Schisto_mansoni.Chr_1	25234490	25234974	29.1486	1	1	450	311	311	311	311
Smp_121460	-1.20926	0.0320374		13.1081	1	1	762	420	420	280	280	1	19	19	38	38	3	13.1081	38	Schisto_mansoni.Chr_1.unplaced.SC_0010	3968465	3973549	12.2893	1	1	762	348	349	230	230	1	12	12	31	31	3	12.2893	31	Schisto_mansoni.Chr_1.unplaced.SC_0010	3968465	3973549	12.9518	1	1	762	345	345	234	234
Smp_149550	-1.20891	0.0851108	hypothetical protein	35.6728	1	1	297	1130	1469	297	297	1	2	2	139	139	3	35.6728	92	Schisto_mansoni.SC_0062	353419	358668	31.8043	1	1	297	890	1214	232	232	1	1	1	109	109	3	31.8043	72	Schisto_mansoni.SC_0062	353419	358668	30.8158	1	1	297	836	1127	217	217
Smp_203630	-1.20889	0.0062099		231.763	1	1	648	4232	4232	4210	4210	1	1039	1039	179	179	3	231.763	656	Schisto_mansoni.Chr_W	29404993	29405862	232.604	1	1	648	3711	3711	3702	3702	1	885	885	175	175	3	232.604	600	Schisto_mansoni.Chr_W	29404993	29405862	255.011	1	1	648	3933	3933	3918	3918
Smp_013210	-1.20844	0.72956		0.0521532	1	1	1368	4	5	1	2	0.5	0	0	0	0	4	0.0521532	0	Schisto_mansoni.Chr_5.unplaced.SC_0198	441403	452275	0.0595249	1	1	1368	10	10	2	2	1	0	0	1	1	4	0.0595249	0	Schisto_mansoni.Chr_5.unplaced.SC_0198	441403	452275	0.0616614	1	1	1368	4	5	1	2
Smp_074560	-1.20819	0.000720372	conserved Schistosoma protein, unknown function	107.853	1	1	1112	6605	6709	3362	3362	1	2723	2723	392	392	12	107.853	296	Schisto_mansoni.Chr_W	45671007	45689597	111.417	1	1	1112	5752	5845	3043	3043	1	2479	2479	344	344	12	111.417	253.5	Schisto_mansoni.Chr_W	45671007	45689597	113.444	1	1	1112	5703	5771	2991	2991
Smp_155910	-1.20792	0.900922	hypothetical protein	0	1	0	327	0	0	0	0	#NUM!	0	0	0	0	2	0	0	Schisto_mansoni.Chr_4	17562595	17565108	0	1	0	327	1	1	0	0	#NUM!	0	0	0	0	2	0	0	Schisto_mansoni.Chr_4	17562595	17565108	0.12898	1	1	327	2	2	1	1
Smp_177340	-1.20792	0.900922		0	1	0	675	0	0	0	0	#NUM!	0	0	0	0	1	0	0	Schisto_mansoni.Chr_1	57245248	57245922	0	1	0	675	0	0	0	0	#NUM!	0	0	0	0	1	0	0	Schisto_mansoni.Chr_1	57245248	57245922	0.0624836	1	1	675	0	1	0	1
Smp_062490	-1.20792	0.900922	dhand, putative	0	1	0	717	0	0	0	0	#NUM!	0	0	0	0	2	0	0	Schisto_mansoni.Chr_4	20187582	20189463	0	1	0	717	0	0	0	0	#NUM!	0	0	0	0	2	0	0	Schisto_mansoni.Chr_4	20187582	20189463	0.0588235	1	1	717	1	1	1	1
Smp_187040	-1.20792	0.900922	hypothetical protein	0	1	0	126	0	0	0	0	#NUM!	0	0	0	0	1	0	0	Schisto_mansoni.SC_0235	138506	138631	0	1	0	126	0	0	0	0	#NUM!	0	0	0	0	1	0	0	Schisto_mansoni.SC_0235	138506	138631	0.334733	1	1	126	0	1	0	1
Smp_189120	-1.20792	0.900922		0	1	0	192	0	0	0	0	#NUM!	0	0	0	0	2	0	0	Schisto_mansoni.Chr_3	19394798	19394990	0	1	0	192	0	0	0	0	#NUM!	0	0	0	0	2	0	0	Schisto_mansoni.Chr_3	19394798	19394990	0.219669	1	1	192	1	1	1	1
Smp_203790	-1.20792	0.900922		0	1	0	390	0	0	0	0	#NUM!	0	0	0	0	1	0	0	Schisto_mansoni.Chr_W	41195329	41195718	0	1	0	390	0	0	0	0	#NUM!	0	0	0	0	1	0	0	Schisto_mansoni.Chr_W	41195329	41195718	0.108145	1	1	390	1	1	1	1
Smp_089330	-1.20792	0.900922	NAD dependent epimerase/dehydratase, putative	0	1	0	603	0	0	0	0	#NUM!	0	0	0	0	2	0	0	Schisto_mansoni.Chr_6	1546428	1548149	0	1	0	603	0	0	0	0	#NUM!	0	0	0	0	2	0	0	Schisto_mansoni.Chr_6	1546428	1548149	0.0699443	1	1	603	1	1	1	1
Smp_151170	-1.20792	0.900922	hypothetical protein	0	1	0	846	0	0	0	0	#NUM!	0	0	0	0	1	0	0	Schisto_mansoni.Chr_1	17509636	17510481	0	1	0	846	0	0	0	0	#NUM!	0	0	0	0	1	0	0	Schisto_mansoni.Chr_1	17509636	17510481	0.0498539	1	1	846	1	1	1	1
Smp_083380	-1.20754	0.000485714	hypothetical protein	48.4724	2	2	1675	2472	2597	2276	2276	1	1208	1208	46	46	13	48.4724	159	Schisto_mansoni.SC_0013	2057403	2069431	48.0073	2	2	1675	2144	2256	1975	1975	1	1038	1038	47	47	13	48.0073	132	Schisto_mansoni.SC_0013	2057403	2069431	47.5649	2	2	1675	2059	2156	1889	1889
Smp_141800	-1.2075	0.306241	oxalate:formate antiporter, putative	9.57221	1	1	600	227	227	161	161	1	85	85	19	19	5	9.57221	29	Schisto_mansoni.Chr_W	11553838	11558731	6.44655	1	1	600	142	142	95	95	1	53	53	12	12	5	6.44655	16	Schisto_mansoni.Chr_W	11553838	11558731	7.45117	1	1	600	165	165	106	106
Smp_149070	-1.20678	0.0171555	nucleolar rna-associated protein, putative	11.1889	1	1	2439	878	880	765	765	1	224	224	46	46	10	11.1889	32	Schisto_mansoni.Chr_4.unplaced.SC_0032	464385	479336	12.4365	1	1	2439	887	889	745	745	1	208	208	44	44	10	12.4365	31	Schisto_mansoni.Chr_4.unplaced.SC_0032	464385	479336	12.2431	1	1	2439	824	825	708	708
Smp_142440	-1.206	0.690886	paired box protein pax-3 and, putative	0.125432	1	1	1422	44	45	5	5	1	0	0	3	3	5	0.125432	0	Schisto_mansoni.Chr_2	4858239	4870487	0.229058	1	1	1422	50	51	8	8	1	0	0	4	4	5	0.229058	0	Schisto_mansoni.Chr_2	4858239	4870487	0.0889798	1	1	1422	42	42	3	3
Smp_181330	-1.20477	0.550296	hypothetical protein	0.0978678	1	1	2916	30	30	8	8	1	7	7	0	0	16	0.0978678	0	Schisto_mansoni.Chr_3	11624611	11692635	0.167552	1	1	2916	25	25	12	12	1	8	8	2	2	16	0.167552	0	Schisto_mansoni.Chr_3	11624611	11692635	0.173566	1	1	2916	27	27	12	12
Smp_000500	-1.20469	0.792209		0.344665	2	1	414	9	10	4	4	1	3	3	1	1	5	0.344665	0	Schisto_mansoni.SC_0113	671841	680550	0.0983455	2	0	414	6	9	1	1	1	0	0	0	0	5	0.0983455	0	Schisto_mansoni.SC_0113	671841	680550	0.611252	2	1	414	8	10	6	6
Smp_199050	-1.20462	0.0663945	hypothetical protein	84.6104	1	1	753	1786	1786	1786	1786	1	0	0	0	0	1	84.6104	247	Schisto_mansoni.SC_0186	346898	347650	76.2934	1	1	753	1411	1411	1411	1411	1	0	0	0	0	1	76.2934	191	Schisto_mansoni.SC_0186	346898	347650	91.5223	1	1	753	1634	1634	1634	1634
Smp_025440	-1.20378	0.0756273	hypothetical protein	58.0442	1	1	2352	4639	4639	3827	3827	1	1972	1972	123	123	14	58.0442	167	Schisto_mansoni.Chr_W	35680085	35695804	50.236	1	1	2352	3569	3575	2902	2902	1	1470	1470	70	70	14	50.236	124	Schisto_mansoni.Chr_W	35680085	35695804	61.8121	1	1	2352	4088	4089	3447	3447
Smp_042430	-1.2035	0.144547	hypothetical protein	6.96353	2	2	876	186	186	171	171	1	100	100	28	28	9	6.96353	19	Schisto_mansoni.Chr_4	19001255	19007083	5.85627	2	2	876	139	139	126	126	1	72	72	22	22	9	5.85627	15	Schisto_mansoni.Chr_4	19001255	19007083	8.08863	2	2	876	179	179	168	168
Smp_132570	-1.20243	0.00929534	choline/ethanolamine kinase, putative	37.1443	1	1	897	1044	1046	934	934	1	421	421	10	10	5	37.1443	110	Schisto_mansoni.Chr_3	24528238	24541115	34.9505	1	1	897	882	884	770	770	1	335	335	7	7	5	34.9505	89	Schisto_mansoni.Chr_3	24528238	24541115	36.9102	1	1	897	851	852	785	785
Smp_022730	-1.20208	0.0881453	nucleolar protein family A member 1 (snornp protein gar1), putative	52.2304	1	1	530	776	776	776	776	1	0	0	0	0	1	52.2304	124	Schisto_mansoni.Chr_2	5641631	5642160	54.2355	1	1	530	706	706	706	706	1	0	0	0	0	1	54.2355	96.5	Schisto_mansoni.Chr_2	5641631	5642160	65.7316	1	1	530	826	826	826	826
Smp_202970	-1.20168	0.000296199		700.122	1	1	1137	20442	22315	20442	22315	0.916065	0	0	0	0	1	700.122	2427	Schisto_mansoni.Chr_6	4077322	4078458	706.658	1	1	1137	18078	19734	18078	19734	0.916084	0	0	0	0	1	706.658	2105	Schisto_mansoni.Chr_6	4077322	4078458	732.208	1	1	1137	18130	19739	18130	19739
Smp_170470	-1.20168	0.0900762	hypothetical protein	4.47241	1	1	1005	471	473	126	126	1	29	29	41	41	7	4.47241	1	Schisto_mansoni.Chr_2	22316094	22334316	3.97022	1	1	1005	429	431	98	98	1	15	15	34	34	7	3.97022	1	Schisto_mansoni.Chr_2	22316094	22334316	4.19666	1	1	1005	376	377	100	100
Smp_210320	-1.20138	0.046606	hypothetical protein	15.0531	1	1	1083	504	504	457	457	1	106	106	12	12	3	15.0531	43	Schisto_mansoni.Chr_2	8578176	8581108	16.3913	1	1	1083	479	479	436	436	1	89	89	18	18	3	16.3913	41	Schisto_mansoni.Chr_2	8578176	8581108	15.8113	1	1	1083	445	446	406	406
Smp_013360	-1.20119	0.0203303	U1 small nuclear ribonucleoprotein 70 kD, putative	65.9417	1	1	1043	2281	2292	1928	1928	1	1261	1261	84	84	9	65.9417	190	Schisto_mansoni.Chr_3	8636973	8643573	68.9384	1	1	1043	2152	2165	1766	1766	1	1134	1134	89	89	9	68.9384	179	Schisto_mansoni.Chr_3	8636973	8643573	73.8795	1	1	1043	2133	2145	1827	1827
Smp_083710	-1.2011	0.00667343	hypothetical protein	3.31861	1	1	4074	393	393	379	379	1	6	6	1	1	2	3.31861	9	Schisto_mansoni.Chr_1	37044420	37052880	3.258	1	1	4074	345	345	326	326	1	6	6	1	1	2	3.258	7	Schisto_mansoni.Chr_1	37044420	37052880	3.34388	1	1	4074	336	336	323	323
Smp_065530	-1.20097	0.740865	subfamily S1A unassigned peptidase (S01 family)	0.277826	1	1	642	5	5	5	5	1	0	0	0	0	2	0.277826	0	Schisto_mansoni.Chr_1	57430924	57431605	0.190257	1	1	642	3	3	3	3	1	1	1	0	0	2	0.190257	0	Schisto_mansoni.Chr_1	57430924	57431605	0.131391	1	1	642	2	2	2	2
Smp_079960	-1.20075	0.552992	tubulin beta chain, putative	1.42232	1	1	1555	34	62	34	62	0.548387	14	14	0	0	3	1.42232	4	Schisto_mansoni.Chr_W	24696391	24699454	1.38772	1	1	1555	33	53	33	53	0.622642	8	8	0	0	3	1.38772	4	Schisto_mansoni.Chr_W	24696391	24699454	2.38683	1	1	1555	45	88	45	88
Smp_159810	-1.20071	0.432045		2.01922	1	1	477	137	140	27	27	1	15	15	7	7	10	2.01922	3	Schisto_mansoni.SC_0319	15874	25542	1.9632	1	1	477	89	90	23	23	1	13	13	8	8	10	1.9632	2	Schisto_mansoni.SC_0319	15874	25542	1.59156	1	1	477	60	60	18	18
Smp_136370	-1.19984	0.209488	hypothetical protein	5.70378	1	1	1476	249	249	236	236	1	9	9	0	0	3	5.70378	17	Schisto_mansoni.Chr_3	13434686	13442028	4.66182	1	1	1476	176	176	169	169	1	5	5	1	1	3	4.66182	12	Schisto_mansoni.Chr_3	13434686	13442028	4.28622	1	1	1476	156	156	150	150
Smp_202440	-1.19977	0.411764		4.14381	1	1	198	23	23	23	23	1	0	0	0	0	1	4.14381	12	Schisto_mansoni.Chr_3.unplaced.SC_0233	269814	270011	3.2901	1	1	198	16	16	16	16	1	0	0	0	0	1	3.2901	8	Schisto_mansoni.Chr_3.unplaced.SC_0233	269814	270011	4.04723	1	1	198	19	19	19	19
Smp_168470	-1.19918	0.388674	hypothetical protein	5.77341	2	2	933	88	151	88	151	0.582781	88	91	0	0	5	5.77341	10	Schisto_mansoni.Chr_7	6525129	6528860	6.19672	2	2	933	74	144	74	142	0.521127	74	75	0	1	5	6.19672	9	Schisto_mansoni.Chr_7	6525129	6528860	4.83695	2	1	933	58	108	58	107
Smp_147470	-1.19915	0.016872	leucine-rich transmembrane proteins, putative	49.6219	1	1	1739	2692	2693	2419	2419	1	384	384	10	10	3	49.6219	132	Schisto_mansoni.Chr_W	29298146	29314270	43.2905	1	1	1739	2088	2088	1849	1849	1	266	266	7	7	3	43.2905	105	Schisto_mansoni.Chr_W	29298146	29314270	44.9898	1	1	1739	2011	2011	1855	1855
Smp_151830	-1.19904	0.24889	CD92-like protein	1.88371	1	1	606	39	39	32	32	1	27	27	0	0	5	1.88371	5	Schisto_mansoni.Chr_4	28957290	28965774	2.14997	1	1	606	37	37	32	32	1	21	21	0	0	5	2.14997	6	Schisto_mansoni.Chr_4	28957290	28965774	1.73995	1	1	606	31	31	25	25
Smp_160970	-1.19892	0.269816		13.0654	1	1	3159	1617	1799	1157	1157	1	0	0	38	38	3	13.0654	38	Schisto_mansoni.Chr_1	23066159	23095176	9.602	1	1	3159	1116	1213	745	745	1	0	0	41	41	3	9.602	24	Schisto_mansoni.Chr_1	23066159	23095176	8.82514	1	1	3159	1030	1134	661	661
Smp_033010	-1.19881	0.112503	similar to 16 kDa calcium-binding protein	7.20317	1	1	624	154	154	126	126	1	66	66	5	5	4	7.20317	22	Schisto_mansoni.Chr_W	15348004	15355797	6.65534	1	1	624	155	155	102	102	1	55	55	6	6	4	6.65534	18	Schisto_mansoni.Chr_W	15348004	15355797	6.08314	1	1	624	110	112	90	90
Smp_063520	-1.19877	0.530871	irx-related	0.354953	1	1	1608	16	16	16	16	1	2	2	0	0	2	0.354953	1	Schisto_mansoni.Chr_1	54643420	54645703	0.253203	1	1	1608	12	12	10	10	1	1	1	0	0	2	0.253203	0	Schisto_mansoni.Chr_1	54643420	54645703	0.314749	1	1	1608	12	12	12	12
Smp_004990	-1.19873	0.00675635	chaperonin containing t-complex protein 1, zeta subunit, tcpz, putative	183.478	1	1	1730	9022	9032	8898	8898	1	3228	3228	19	19	7	183.478	525	Schisto_mansoni.Chr_1	32414350	32424976	179.076	1	1	1730	7741	7751	7609	7609	1	2871	2871	16	16	7	179.076	447	Schisto_mansoni.Chr_1	32414350	32424976	198.351	1	1	1730	8266	8280	8136	8136
Smp_200760	-1.1986	0.771397		0.110101	1	1	324	1	1	1	1	1	0	0	0	0	1	0.110101	0	Schisto_mansoni.Chr_1	21467208	21467531	0.251327	1	1	324	2	2	2	2	1	0	0	0	0	1	0.251327	0	Schisto_mansoni.Chr_1	21467208	21467531	0.130174	1	1	324	1	1	1	1
Smp_074450	-1.19858	0.0186514		74.662	1	1	796	1885	1889	1666	1666	1	564	564	19	19	3	74.662	246.5	Schisto_mansoni.Chr_W	45605918	45611022	82.76	1	1	796	1830	1831	1618	1618	1	570	570	17	17	3	82.76	243.5	Schisto_mansoni.Chr_W	45605918	45611022	75.5573	1	1	796	1570	1570	1426	1426
Smp_165870	-1.19832	0.0010776		59.8278	1	1	765	1402	1451	1283	1283	1	628	628	10	10	5	59.8278	177	Schisto_mansoni.Chr_3.unplaced.SC_0174	355405	362253	62.2168	1	1	765	1264	1301	1169	1169	1	566	566	17	17	5	62.2168	162	Schisto_mansoni.Chr_3.unplaced.SC_0174	355405	362253	61.528	1	1	765	1216	1246	1116	1116
Smp_164200	-1.19831	0.0225766	ptx1 protein, putative	30.8974	1	1	1748	1618	1639	1514	1514	1	807	807	39	39	10	30.8974	105	Schisto_mansoni.Chr_1	44976345	45002095	28.0207	1	1	1748	1297	1314	1203	1203	1	595	595	52	52	10	28.0207	81	Schisto_mansoni.Chr_1	44976345	45002095	27.82	1	1	1748	1220	1239	1153	1153
Smp_210790	-1.19823	0.000158383	z-protein (S1r protein), putative	217.022	1	1	729	4815	4816	4435	4435	1	2886	2886	84	84	6	217.022	655	Schisto_mansoni.Chr_1	13569843	13575001	216.421	1	1	729	4234	4235	3875	3875	1	2487	2487	88	88	6	216.421	577	Schisto_mansoni.Chr_1	13569843	13575001	218.75	1	1	729	4066	4066	3781	3781
Smp_025390	-1.19816	0.679068	Calcium-binding protein 2 (CaBP2), putative	1.49886	1	1	357	23	23	15	15	1	6	6	3	3	3	1.49886	4	Schisto_mansoni.Chr_W	35748808	35751996	0.798334	1	1	357	10	10	7	7	1	4	4	0	0	3	0.798334	2	Schisto_mansoni.Chr_W	35748808	35751996	2.71725	1	1	357	30	30	23	23
Smp_195130	-1.19786	0.216834	retrovirus-related Pol polyprotein	9.04502	1	1	4149	83	1052	83	1052	0.0788973	0	0	0	0	1	9.04502	25	Schisto_mansoni.Chr_1	35745863	35750011	9.60714	1	1	4149	72	979	72	979	0.0735444	0	0	0	0	1	9.60714	20	Schisto_mansoni.Chr_1	35745863	35750011	9.18956	1	1	4149	69	904	69	904
Smp_137310	-1.19748	0.662344		0.688423	1	1	570	11	11	11	11	1	0	0	0	0	1	0.688423	1	Schisto_mansoni.Chr_1.unplaced.SC_0010	255851	256420	0.35715	1	1	570	5	5	5	5	1	0	0	0	0	1	0.35715	1	Schisto_mansoni.Chr_1.unplaced.SC_0010	255851	256420	1.1839	1	1	570	16	16	16	16
Smp_209060	-1.19727	0.375568	alpha(1,3)fucosyltransferase, putative	1.36065	1	1	1206	53	56	44	46	0.956522	8	8	6	6	3	1.36065	1	Schisto_mansoni.Chr_W	44488088	44494883	1.6205	1	1	1206	52	58	42	48	0.875	8	8	7	7	3	1.6205	3	Schisto_mansoni.Chr_W	44488088	44494883	0.909276	1	1	1206	36	38	25	26
Smp_174510	-1.19691	0.00279707	dynein light chain, putative	296.67	1	1	512	4496	4496	4258	4258	1	951	951	40	40	2	296.67	909.5	Schisto_mansoni.Chr_1	44124303	44126556	273.872	1	1	512	3627	3627	3444	3444	1	792	792	40	40	2	273.872	745.5	Schisto_mansoni.Chr_1	44124303	44126556	287.903	1	1	512	3676	3676	3495	3495
Smp_136360	-1.19665	0.293571	DNA cross-link repair protein pso2/snm1, putative	22.6361	1	1	1401	1303	1316	889	889	1	389	389	34	34	7	22.6361	66	Schisto_mansoni.Chr_3	13549276	13577954	19.7327	1	1	1401	1103	1113	679	679	1	255	255	27	27	7	19.7327	51	Schisto_mansoni.Chr_3	13549276	13577954	30.0744	1	1	1401	1334	1344	999	999
Smp_005960	-1.1963	0.169075	hypothetical protein	10.5583	1	1	348	175	188	103	103	1	8	8	0	0	2	10.5583	32	Schisto_mansoni.Chr_1	38041616	38057814	9.00879	1	1	348	131	144	77	77	1	1	1	0	0	2	9.00879	23	Schisto_mansoni.Chr_1	38041616	38057814	7.51419	1	1	348	109	115	62	62
Smp_127430	-1.19627	0.00318719		18.9055	1	1	2319	1371	1371	1229	1229	1	334	334	18	18	8	18.9055	52	Schisto_mansoni.Chr_1.unplaced.SC_0010	3248226	3263783	20.3136	1	1	2319	1326	1326	1157	1157	1	318	318	19	19	8	20.3136	50	Schisto_mansoni.Chr_1.unplaced.SC_0010	3248226	3263783	20.2789	1	1	2319	1207	1208	1115	1115
Smp_000690	-1.19611	0.621777	pou4/brn-3, putative	0.561777	1	1	1143	18	18	18	18	1	0	0	0	0	1	0.561777	2	Schisto_mansoni.SC_0113	148391	149533	0.427455	1	1	1143	12	12	12	12	1	0	0	0	0	1	0.427455	0	Schisto_mansoni.SC_0113	148391	149533	0.996293	1	1	1143	27	27	27	27
Smp_141190	-1.19593	0.300248	hypothetical protein	4.48197	1	1	390	115	120	49	49	1	3	3	2	2	4	4.48197	4	Schisto_mansoni.Chr_1	14550856	14567117	3.34072	1	1	390	84	90	32	32	1	5	5	2	2	4	3.34072	2	Schisto_mansoni.Chr_1	14550856	14567117	3.46063	1	1	390	83	87	32	32
Smp_129190	-1.1956	0.659025	hypothetical protein	0.475638	1	1	375	5	5	5	5	1	0	0	1	1	2	0.475638	0	Schisto_mansoni.SC_0183	510159	512558	0.32572	1	1	375	3	3	3	3	1	0	0	0	0	2	0.32572	1	Schisto_mansoni.SC_0183	510159	512558	0.224941	1	1	375	2	2	2	2
Smp_140690	-1.19517	0.0422295	DNA-directed RNA polymerase I subunit, putative	6.46372	1	1	3499	714	716	634	634	1	280	280	13	13	19	6.46372	18	Schisto_mansoni.Chr_2	6798995	6825451	6.60936	1	1	3499	652	653	568	568	1	231	231	10	10	19	6.60936	16	Schisto_mansoni.Chr_2	6798995	6825451	7.01534	1	1	3499	643	643	582	582
Smp_150840	-1.19516	0.0208522	hypothetical protein	16.2531	2	2	1104	609	614	503	503	1	225	225	10	10	7	16.2531	46	Schisto_mansoni.Chr_4	14359554	14367480	18.2923	2	2	1104	625	629	496	496	1	213	213	13	13	7	18.2923	47	Schisto_mansoni.Chr_4	14359554	14367480	18.414	2	2	1104	613	618	482	482
Smp_142800	-1.19481	0.480913		1.10613	1	0	129	9	9	4	4	1	0	0	4	4	3	1.10613	3	Schisto_mansoni.Chr_4	30463947	30465338	0.631241	1	0	129	9	9	2	2	1	0	0	2	2	3	0.631241	1	Schisto_mansoni.Chr_4	30463947	30465338	0.980847	1	0	129	5	5	3	3
Smp_196060	-1.19449	0.00532264	Mername-AA021 peptidase (M24 family)	16.4025	1	1	4167	2369	2378	1916	1916	1	314	314	474	474	21	16.4025	8	Schisto_mansoni.Chr_W	10006477	10074641	17.3139	1	1	4167	2219	2229	1772	1772	1	283	283	435	435	21	17.3139	7	Schisto_mansoni.Chr_W	10006477	10074641	17.571	1	1	4167	2124	2129	1736	1736
Smp_097250	-1.19447	0.00678533	rrp4, putative	27.1945	1	1	446	340	340	340	340	1	0	0	0	0	1	27.1945	91	Schisto_mansoni.SC_0137	846164	846609	27.5694	1	1	446	302	302	302	302	1	0	0	0	0	1	27.5694	84.5	Schisto_mansoni.SC_0137	846164	846609	27.1404	1	1	446	287	287	287	287
Smp_058720	-1.19446	0.0381997	60S ribosomal protein L38, putative	46.3958	1	1	1517	2024	2024	1973	1973	1	539	539	103	103	4	46.3958	83	Schisto_mansoni.SC_0013	562455	564360	53.1953	1	1	1517	2016	2016	1982	1982	1	557	557	114	114	4	53.1953	88	Schisto_mansoni.SC_0013	562455	564360	55.0212	1	1	1517	2020	2020	1979	1979
Smp_165180	-1.19437	0.758997	hypothetical protein	0.311281	1	1	573	3	6	3	5	0.6	0	0	0	0	1	0.311281	0	Schisto_mansoni.Chr_3	17363591	17364272	0.923727	1	1	573	5	14	5	13	0.384615	0	0	1	3	1	0.923727	3	Schisto_mansoni.Chr_3	17363591	17364272	1.84016	1	1	573	8	25	8	25
Smp_028550	-1.19433	0.026603	DEAD/DEAH box helicase, fragment	12.0599	1	1	1337	595	595	452	452	1	127	127	16	16	5	12.0599	32	Schisto_mansoni.Chr_W.unplaced.SC_0115	996799	1004761	11.4197	1	1	1337	475	475	375	375	1	96	96	22	22	5	11.4197	28	Schisto_mansoni.Chr_W.unplaced.SC_0115	996799	1004761	11.1356	1	1	1337	448	448	353	353
Smp_133080	-1.19414	0.461876		0.455883	1	1	939	39	39	12	12	1	5	5	0	0	6	0.455883	1	Schisto_mansoni.Chr_1	16918714	16940970	0.52032	1	1	939	40	40	12	12	1	6	6	1	1	6	0.52032	1	Schisto_mansoni.Chr_1	16918714	16940970	0.673745	1	1	939	35	35	15	15
Smp_199840	-1.1928	0.501282	nucleolar protein c7b, putative	6.10193	1	1	228	39	39	39	39	1	25	25	0	0	2	6.10193	17	Schisto_mansoni.SC_0563	7170	7433	10.7145	1	1	228	60	60	60	60	1	30	30	1	1	2	10.7145	27	Schisto_mansoni.SC_0563	7170	7433	5.73451	1	1	228	31	31	31	31
Smp_180180	-1.19235	0.147673	sil1, putative	32.2933	1	1	1045	965	971	946	946	1	313	313	85	85	5	32.2933	98	Schisto_mansoni.SC_0129	313003	316888	41.806	1	1	1045	1096	1099	1073	1073	1	366	366	83	83	5	41.806	108	Schisto_mansoni.SC_0129	313003	316888	37.091	1	1	1045	932	933	919	919
Smp_137880	-1.19185	0.152729	hypothetical protein	3.74979	1	1	1075	124	124	113	113	1	4	4	20	20	3	3.74979	7	Schisto_mansoni.Chr_3	5213979	5224263	3.67382	1	1	1075	103	103	97	97	1	4	4	13	13	3	3.67382	8	Schisto_mansoni.Chr_3	5213979	5224263	4.78653	1	1	1075	130	130	122	122
Smp_148680	-1.19168	0.30585	DNA double-strand break repair rad50 ATPase, putative	1.39926	1	1	2116	206	279	83	83	1	22	22	9	9	10	1.39926	3	Schisto_mansoni.Chr_1	49965334	49993854	1.53932	1	1	2116	187	263	80	80	1	26	26	7	7	10	1.53932	3	Schisto_mansoni.Chr_1	49965334	49993854	1.33545	1	1	2116	135	205	67	67
Smp_028190	-1.19161	0.0525477	methylthioadenosine phosphorylase, putative	50.0985	1	1	957	1547	1556	1344	1344	1	655	655	16	16	6	50.0985	151	Schisto_mansoni.Chr_W.unplaced.SC_0115	37685	55222	48.1178	1	1	957	1309	1312	1131	1131	1	541	541	12	12	6	48.1178	124	Schisto_mansoni.Chr_W.unplaced.SC_0115	37685	55222	56.5437	1	1	957	1495	1502	1283	1283
Smp_162280	-1.19137	0.00894843	coproporphyrinogen oxidase	13.7048	1	1	1593	769	771	611	612	0.998366	436	436	14	15	11	13.7048	44	Schisto_mansoni.Chr_6	847997	865402	14.7729	1	1	1593	726	729	577	578	0.99827	414	414	12	13	11	14.7729	43	Schisto_mansoni.Chr_6	847997	865402	13.8735	1	1	1593	611	615	520	524
Smp_208040	-1.19111	0.624249	hypothetical protein	0.555651	1	1	642	26	31	10	10	1	0	0	4	4	4	0.555651	2	Schisto_mansoni.Chr_2	34441407	34459335	0.634191	1	1	642	35	38	10	10	1	0	0	3	3	4	0.634191	1	Schisto_mansoni.Chr_2	34441407	34459335	0.197086	1	1	642	10	12	3	3
Smp_200620	-1.19103	0.788616		0.180166	1	1	396	2	2	2	2	1	0	0	0	0	1	0.180166	0	Schisto_mansoni.Chr_1	44688294	44688689	0.616895	1	1	396	6	6	6	6	1	0	0	0	0	1	0.616895	1	Schisto_mansoni.Chr_1	44688294	44688689	0.319518	1	1	396	3	3	3	3
Smp_158800	-1.19093	0.639645	hypothetical protein	0.374518	1	1	762	24	24	8	8	1	2	2	2	2	6	0.374518	1	Schisto_mansoni.Chr_W	10320237	10324247	0.908341	1	1	762	34	34	17	17	1	14	14	1	1	6	0.908341	2	Schisto_mansoni.Chr_W	10320237	10324247	0.387447	1	1	762	22	22	7	7
Smp_073490	-1.19072	0.0432581	protein kinase	23.6898	1	1	1033	867	870	686	686	1	261	261	18	18	5	23.6898	63	Schisto_mansoni.Chr_1	10119529	10132114	23.4121	1	1	1033	736	739	594	594	1	225	225	10	10	5	23.4121	60	Schisto_mansoni.Chr_1	10119529	10132114	26.6614	1	1	1033	798	800	653	653
Smp_134830	-1.19065	0.0660192	suppressor of actin (sac), putative	6.97947	1	1	828	225	235	162	162	1	116	116	5	5	8	6.97947	21	Schisto_mansoni.Chr_3	21117510	21148286	6.63832	1	1	828	203	213	135	135	1	98	98	2	2	8	6.63832	17	Schisto_mansoni.Chr_3	21117510	21148286	5.8069	1	1	828	151	161	114	114
Smp_188200	-1.19037	0.762895	hypothetical protein	0.222955	1	1	480	3	3	3	3	1	1	1	0	0	2	0.222955	0	Schisto_mansoni.Chr_1	7163931	7167561	1.01788	1	1	480	15	15	12	12	1	3	3	0	0	2	1.01788	2	Schisto_mansoni.Chr_1	7163931	7167561	0.35147	1	1	480	5	5	4	4
Smp_103140	-1.19036	0.0190688	alpha tubulin, putative	19.4311	1	1	1935	1054	1054	1054	1054	1	79	79	7	7	2	19.4311	56	Schisto_mansoni.Chr_4	31959651	31961634	18.2639	1	1	1935	868	868	868	868	1	65	65	4	4	2	18.2639	47	Schisto_mansoni.Chr_4	31959651	31961634	19.7913	1	1	1935	908	908	908	908
Smp_173720	-1.19018	0.686038	transient receptor potential cation channel, subfamily m, member, putative	0.189346	1	1	1884	19	19	10	10	1	3	3	1	1	8	0.189346	0	Schisto_mansoni.SC_0170	350008	358870	0.0648329	1	1	1884	7	7	3	3	1	1	1	0	0	8	0.0648329	0	Schisto_mansoni.SC_0170	350008	358870	0.0895465	1	1	1884	7	7	4	4
Smp_200450	-1.19011	0.625591		3.43977	1	1	1203	116	116	116	116	1	0	0	0	0	1	3.43977	8	Schisto_mansoni.Chr_1	19396778	19397980	1.82761	1	1	1203	54	54	54	54	1	0	0	0	0	1	1.82761	3	Schisto_mansoni.Chr_1	19396778	19397980	1.36732	1	1	1203	39	39	39	39
Smp_051660	-1.1901	0.00312246	hypothetical protein	163.003	1	1	843	4428	4475	3852	3852	1	453	453	24	24	2	163.003	404	Schisto_mansoni.SC_0049	1700740	1707128	165.372	1	1	843	3902	3941	3424	3424	1	412	412	15	15	2	165.372	389	Schisto_mansoni.SC_0049	1700740	1707128	154.897	1	1	843	3488	3510	3096	3096
Smp_190970	-1.19005	0.00350181	Stard10 protein , putative	100.404	1	1	480	1351	1351	1351	1351	1	462	462	2	2	2	100.404	362.5	Schisto_mansoni.SC_1762	2186	2699	100.091	1	1	480	1180	1180	1180	1180	1	366	366	1	1	2	100.091	301	Schisto_mansoni.SC_1762	2186	2699	106.671	1	1	480	1214	1214	1214	1214
Smp_002410	-1.19	0.0257278	14-3-3 epsilon 2	338.007	1	1	947	8998	8998	8973	8973	1	2886	2886	20	20	4	338.007	1074	Schisto_mansoni.Chr_2.unplaced.SC_0171	128616	131145	336.942	1	1	947	7857	7857	7837	7837	1	2649	2649	23	23	4	336.942	922	Schisto_mansoni.Chr_2.unplaced.SC_0171	128616	131145	377.005	1	1	947	8491	8491	8465	8465
Smp_177240	-1.18899	0.137072	hypothetical protein	6.96161	1	1	825	151	188	130	161	0.807453	91	96	6	6	6	6.96161	21	Schisto_mansoni.SC_0385	5679	25260	7.25468	1	1	825	156	185	121	147	0.823129	77	80	4	4	6	7.25468	18	Schisto_mansoni.SC_0385	5679	25260	8.17967	1	1	825	150	176	134	160
Smp_032740	-1.18835	0.67421	GTP-binding protein (I) alpha subunit, gnai, putative	0.706392	1	1	303	17	17	6	6	1	0	0	1	1	2	0.706392	2	Schisto_mansoni.Chr_2	921807	938818	0.537492	1	1	303	12	12	4	4	1	0	0	2	2	2	0.537492	2	Schisto_mansoni.Chr_2	921807	938818	1.25276	1	1	303	17	17	9	9
Smp_137780	-1.18831	0.252336	androgen induced inhibitor of proliferation (as3) / pds5, putative	4.42532	1	1	1056	138	138	131	131	1	72	72	0	0	6	4.42532	12	Schisto_mansoni.Chr_3	4724757	4730720	4.85805	1	1	1056	128	128	126	126	1	76	76	0	0	6	4.85805	12	Schisto_mansoni.Chr_3	4724757	4730720	5.87115	1	1	1056	153	153	147	147
Smp_044850	-1.1882	0.0723818	ribokinase, putative	44.5291	1	1	1297	2457	2463	1619	1619	1	433	433	146	146	6	44.5291	135	Schisto_mansoni.Chr_2	9524835	9532223	42.3474	1	1	1297	2063	2070	1349	1349	1	362	362	137	137	6	42.3474	112	Schisto_mansoni.Chr_2	9524835	9532223	45.7534	1	1	1297	2115	2120	1407	1407
Smp_015690	-1.18818	0.000115468	hypothetical protein	107.83	1	1	2417	7695	7703	7306	7306	1	1621	1621	51	51	8	107.83	292	Schisto_mansoni.Chr_W	21405088	21421797	107.776	1	1	2417	6754	6764	6398	6398	1	1419	1419	34	34	8	107.776	254	Schisto_mansoni.Chr_W	21405088	21421797	109.585	1	1	2417	6572	6577	6280	6280
Smp_167200	-1.18811	0.122381	putative ATPase	16.3853	1	1	1942	925	925	892	892	1	415	415	32	32	11	16.3853	48	Schisto_mansoni.Chr_1	39807735	39816291	16.0386	1	1	1942	789	790	765	765	1	343	343	16	16	11	16.0386	40	Schisto_mansoni.Chr_1	39807735	39816291	19.9806	1	1	1942	945	945	920	920
Smp_176220	-1.18799	0.668035	camp-dependent rap1 guanine-nucleotide exchange factor, putative	0.857005	1	1	333	16	16	8	8	1	0	0	7	7	3	0.857005	2	Schisto_mansoni.SC_0207	405363	406219	0.366802	1	1	333	7	7	3	3	1	0	0	2	2	3	0.366802	1	Schisto_mansoni.SC_0207	405363	406219	1.1399	1	1	333	11	11	9	9
Smp_050820	-1.18743	0.110209	replication factor C / DNA polymerase III gamma- tau subunit, putative	14.0548	1	1	1165	506	509	459	459	1	193	193	3	3	6	14.0548	43	Schisto_mansoni.Chr_4	6256538	6265359	14.5735	1	1	1165	454	454	417	417	1	180	180	1	1	6	14.5735	39	Schisto_mansoni.Chr_4	6256538	6265359	17.6308	1	1	1165	509	512	487	487
Smp_027300	-1.18733	0.0109633	histone-lysine n-methyltransferase, suv9, putative	19.8593	1	1	1834	1356	1360	1021	1021	1	494	494	20	20	11	19.8593	55	Schisto_mansoni.Chr_4	26292894	26317207	18.6481	1	1	1834	1127	1129	840	840	1	382	382	17	17	11	18.6481	45	Schisto_mansoni.Chr_4	26292894	26317207	18.2826	1	1	1834	1078	1081	795	795
Smp_130760	-1.18731	0.00306794	histidine kinase, putative	3.07881	1	1	3279	313	314	283	283	1	45	45	13	13	10	3.07881	9	Schisto_mansoni.Chr_W	21614171	21636070	3.15389	1	1	3279	297	298	254	254	1	40	40	19	19	10	3.15389	8	Schisto_mansoni.Chr_W	21614171	21636070	3.15133	1	1	3279	279	281	245	245
Smp_201240	-1.18699	0.880058		0	1	0	183	0	0	0	0	#NUM!	0	0	0	0	1	0	0	Schisto_mansoni.Chr_1.unplaced.SC_0071	626775	626957	0.222487	1	1	183	0	1	0	1	0	0	0	0	0	1	0.222487	1	Schisto_mansoni.Chr_1.unplaced.SC_0071	626775	626957	0.230472	1	1	183	0	1	0	1
Smp_206000	-1.18655	0.836666		0.669912	1	1	213	4	4	4	4	1	0	0	0	0	1	0.669912	1	Schisto_mansoni.SC_1195	991	1203	0.573451	1	1	213	3	3	3	3	1	0	0	0	0	1	0.573451	1	Schisto_mansoni.SC_1195	991	1203	0.594034	1	1	213	3	3	3	3
Smp_137890	-1.18651	0.0778731	ATP-binding cassette, sub-family g2 (white protein) (abcg2), putative	7.27358	1	1	1437	439	441	293	293	1	142	142	24	24	9	7.27358	20	Schisto_mansoni.Chr_3	5227866	5248426	7.42334	1	1	1437	408	408	262	262	1	117	117	16	16	9	7.42334	18	Schisto_mansoni.Chr_3	5227866	5248426	8.5703	1	1	1437	393	395	292	292
Smp_197700	-1.18582	0.286848	G-protein coupled receptor fragment, putative	0.532271	1	1	3351	51	51	50	50	1	4	4	0	0	3	0.532271	1	Schisto_mansoni.Chr_3.unplaced.SC_0077	71483	82817	0.376654	1	1	3351	33	33	31	31	1	1	1	0	0	3	0.376654	0	Schisto_mansoni.Chr_3.unplaced.SC_0077	71483	82817	0.578966	1	1	3351	46	46	46	46
Smp_200130	-1.18579	0.268981		13.7534	1	1	249	95	96	95	96	0.989583	0	0	0	0	1	13.7534	28	Schisto_mansoni.Chr_1	59380429	59380677	15.6974	1	1	249	91	96	91	96	0.947917	0	0	0	0	1	15.6974	27	Schisto_mansoni.Chr_1	59380429	59380677	11.1793	1	1	249	66	66	66	66
Smp_138200	-1.18566	0.0351412	hypothetical protein	5.71434	1	1	5119	1014	1017	820	820	1	331	331	14	14	26	5.71434	14	Schisto_mansoni.Chr_3.unplaced.SC_0124	19289	72347	6.30729	1	1	5119	968	971	793	793	1	307	307	18	18	26	6.30729	12	Schisto_mansoni.Chr_3.unplaced.SC_0124	19289	72347	6.07228	1	1	5119	866	871	737	737
Smp_169460	-1.18554	0.0102268	rab, putative	100.198	1	1	591	2251	2253	1660	1660	1	1094	1094	329	329	6	100.198	299	Schisto_mansoni.SC_0041	1423118	1430944	102.373	1	1	591	1993	1996	1486	1486	1	1036	1036	237	237	6	102.373	269	Schisto_mansoni.SC_0041	1423118	1430944	97.3412	1	1	591	1831	1835	1364	1364
Smp_000850	-1.18549	0.00256899	DnaJ domain, putative	90.0361	1	1	1817	4660	4695	4586	4586	1	1957	1957	41	41	7	90.0361	292	Schisto_mansoni.Chr_1	64972709	64987161	85.6876	1	1	1817	3907	3943	3824	3824	1	1641	1641	33	33	7	85.6876	257	Schisto_mansoni.Chr_1	64972709	64987161	91.2004	1	1	1817	4002	4024	3929	3929
Smp_152430	-1.18542	0.19171	hypothetical protein	10.7897	1	1	3369	2076	2078	1019	1019	1	139	139	343	343	16	10.7897	23	Schisto_mansoni.SC_0097	1057479	1100058	9.3902	1	1	3369	1700	1700	777	777	1	138	138	238	238	16	9.3902	17	Schisto_mansoni.SC_0097	1057479	1100058	7.74924	1	1	3369	1418	1420	619	619
Smp_140190	-1.18542	0.581963		0.854045	1	1	1086	26	26	26	26	1	0	0	0	0	1	0.854045	2	Schisto_mansoni.Chr_7	4153709	4154794	0.974762	1	1	1086	26	26	26	26	1	0	0	0	0	1	0.974762	2	Schisto_mansoni.Chr_7	4153709	4154794	0.466038	1	1	1086	12	12	12	12
Smp_106260	-1.18512	0.0858086		6.35879	1	1	561	100	100	100	100	1	0	0	0	0	1	6.35879	7	Schisto_mansoni.SC_0149	497363	497923	6.09637	1	1	561	84	84	84	84	1	0	0	0	0	1	6.09637	6	Schisto_mansoni.SC_0149	497363	497923	7.4429	1	1	561	99	99	99	99
Smp_157500	-1.1843	0.00111845	calpain (C02 family)	181.772	1	1	4825	26776	26931	24584	24586	0.999919	15769	15769	140	142	38	181.772	327	Schisto_mansoni.Chr_1	57321236	57423831	175.602	1	1	4825	22701	22849	20806	20810	0.999808	13301	13301	137	141	38	175.602	280	Schisto_mansoni.Chr_1	57321236	57423831	176.984	1	1	4825	22027	22163	20246	20247
Smp_180800	-1.18423	0.0705383		37.0418	1	1	443	460	460	460	460	1	272	272	56	56	3	37.0418	109	Schisto_mansoni.Chr_1	35365492	35366015	39.3364	1	1	443	428	428	428	428	1	264	264	36	36	3	39.3364	102	Schisto_mansoni.Chr_1	35365492	35366015	39.7011	1	1	443	417	417	417	417
Smp_135460	-1.18418	0.0147368	thymidylate synthase, putative	7.31321	1	1	639	131	131	131	131	1	21	21	0	0	2	7.31321	22	Schisto_mansoni.Chr_2	14838089	14841907	6.56283	1	1	639	104	104	103	103	1	15	15	0	0	2	6.56283	17	Schisto_mansoni.Chr_2	14838089	14841907	6.9964	1	1	639	106	106	106	106
Smp_172340	-1.18393	0.214404	hypothetical protein	1.9402	1	1	1857	101	101	101	101	1	0	0	0	0	1	1.9402	6	Schisto_mansoni.Chr_1	27865950	27867806	1.42514	1	1	1857	65	65	65	65	1	0	0	0	0	1	1.42514	4	Schisto_mansoni.Chr_1	27865950	27867806	1.61256	1	1	1857	71	71	71	71
Smp_198020	-1.18388	0.18435	o-methyltransferase, putative	8.64341	1	1	714	212	525	173	173	1	82	82	6	6	4	8.64341	28	Schisto_mansoni.Chr_4	30767839	30777877	10.4354	1	1	714	227	659	183	183	1	94	94	2	2	4	10.4354	28	Schisto_mansoni.Chr_4	30767839	30777877	11.3416	1	1	714	230	670	192	192
Smp_148530	-1.18339	0.00135979	heat shock protein hsp16, putative	306.912	1	1	2275	21120	21139	19573	19573	1	5640	5640	1542	1542	9	306.912	860	Schisto_mansoni.Chr_1	49003395	49026311	295.35	1	1	2275	17863	17877	16503	16503	1	4778	4778	1281	1281	9	295.35	723	Schisto_mansoni.Chr_1	49003395	49026311	300.185	1	1	2275	17484	17493	16192	16192
Smp_032280	-1.18327	0.317379	hypothetical protein	9.92159	1	1	3973	1110	1110	1105	1105	1	41	41	41	41	3	9.92159	27	Schisto_mansoni.Chr_W	51684218	51694281	7.68595	1	1	3973	759	759	750	750	1	19	19	29	29	3	7.68595	19	Schisto_mansoni.Chr_W	51684218	51694281	6.25268	1	1	3973	597	597	589	589
Smp_008580	-1.18305	0.00125543	sugar transporter, putative	61.3127	1	1	1504	2682	2687	2585	2585	1	390	390	7	7	3	61.3127	188	Schisto_mansoni.Chr_4.unplaced.SC_0032	133374	138477	60.7206	1	1	1504	2365	2367	2243	2243	1	341	341	9	9	3	60.7206	158	Schisto_mansoni.Chr_4.unplaced.SC_0032	133374	138477	64.4144	1	1	1504	2383	2384	2297	2297
Smp_009230	-1.18299	0.612332		377.033	1	1	318	3361	3361	3361	3361	1	1233	1233	2	2	2	377.033	1172	Schisto_mansoni.Chr_6	18567332	18567744	486.148	1	1	318	3797	3797	3797	3797	1	1361	1361	0	0	2	486.148	1311	Schisto_mansoni.Chr_6	18567332	18567744	750.289	1	1	318	5655	5657	5655	5657
Smp_127820	-1.18278	0.00896006	hypothetical protein	30.042	1	1	3212	3143	3152	2705	2705	1	475	475	17	17	7	30.042	84	Schisto_mansoni.Chr_7	2346951	2400027	30.08	1	1	3212	2729	2745	2373	2373	1	435	435	11	11	7	30.08	72	Schisto_mansoni.Chr_7	2346951	2400027	27.5486	1	1	3212	2366	2376	2098	2098
Smp_141390	-1.18241	0.00470145	innexin, putative	78.655	1	1	1347	3146	3156	2970	2970	1	510	510	271	271	4	78.655	210	Schisto_mansoni.Chr_1	13653058	13684427	75.6871	1	1	1347	2677	2680	2504	2504	1	424	424	264	264	4	75.6871	181	Schisto_mansoni.Chr_1	13653058	13684427	77.7775	1	1	1347	2579	2584	2484	2484
Smp_008545	-1.18227	0.027874	heat shock protein HSP60, putative	388.742	1	1	1677	18371	18371	18275	18275	1	3897	3897	755	755	5	388.742	1054	Schisto_mansoni.Chr_4.unplaced.SC_0032	188514	191484	392.146	1	1	1677	16244	16244	16152	16152	1	3460	3460	742	742	5	392.146	912	Schisto_mansoni.Chr_4.unplaced.SC_0032	188514	191484	440.576	1	1	1677	17607	17607	17518	17518
Smp_160550	-1.18179	0.0669676	Dyp-type peroxidase, putative	13.141	1	1	1132	655	675	416	417	0.997602	153	154	65	65	8	13.141	34	Schisto_mansoni.SC_0150	446415	456232	13.9553	1	1	1132	605	614	388	388	1	155	155	48	48	8	13.9553	32	Schisto_mansoni.SC_0150	446415	456232	14.0836	1	1	1132	627	632	378	378
Smp_149660	-1.18172	0.00139039	hypothetical protein	37.3722	1	1	2393	3214	3253	2507	2507	1	1190	1190	48	48	13	37.3722	101	Schisto_mansoni.SC_0239	97666	122713	38.9286	1	1	2393	2935	2974	2288	2288	1	1055	1055	50	50	13	38.9286	86	Schisto_mansoni.SC_0239	97666	122713	39.8147	1	1	2393	2747	2774	2259	2259
Smp_192920	-1.18146	0.15969	hypothetical protein	6.68865	1	1	528	81	99	81	99	0.818182	81	81	0	1	2	6.68865	6	Schisto_mansoni.Chr_W	56103916	56104480	6.94006	1	1	528	70	90	70	90	0.777778	70	70	0	0	2	6.94006	5	Schisto_mansoni.Chr_W	56103916	56104480	5.51169	1	1	528	53	69	53	69
Smp_129610	-1.18112	0.22242	malate dehydrogenase, putative	5.49763	1	1	1155	10464	12204	178	178	1	130	130	3	3	11	5.49763	15	Schisto_mansoni.Chr_1	5207575	5238056	7.01497	1	1	1155	10532	12369	199	199	1	143	143	7	7	11	7.01497	17	Schisto_mansoni.Chr_1	5207575	5238056	7.85102	1	1	1155	10477	12256	215	215
Smp_185890	-1.1805	0.602589		0.285097	1	1	1001	8	8	8	8	1	0	0	0	0	1	0.285097	0	Schisto_mansoni.Chr_3	16311092	16312092	0.203372	1	1	1001	5	5	5	5	1	0	0	0	0	1	0.203372	0	Schisto_mansoni.Chr_3	16311092	16312092	0.29494	1	1	1001	7	7	7	7
Smp_150350	-1.18017	0.00129799	synaptotagmin, putative	37.7985	1	1	1997	2520	2525	2116	2116	1	1029	1029	20	20	9	37.7985	140	Schisto_mansoni.SC_0134	635033	664221	37.9015	1	1	1997	2186	2187	1859	1859	1	857	857	9	9	9	37.9015	116	Schisto_mansoni.SC_0134	635033	664221	37.34	1	1	1997	2071	2073	1768	1768
Smp_002010	-1.17964	0.0248054	nep1, putative	15.3728	1	1	1810	569	784	565	780	0.724359	172	172	1	1	3	15.3728	41	Schisto_mansoni.Chr_6	2444113	2447332	15.8361	1	1	1810	518	719	503	704	0.714489	158	158	1	1	3	15.8361	39	Schisto_mansoni.Chr_6	2444113	2447332	15.6589	1	1	1810	500	676	496	672
Smp_133090	-1.17942	0.298612		1.18909	1	1	390	41	51	13	13	1	6	6	5	5	4	1.18909	2	Schisto_mansoni.Chr_1	16893141	16907673	1.04398	1	1	390	30	35	10	10	1	5	5	3	3	4	1.04398	2	Schisto_mansoni.Chr_1	16893141	16907673	1.18959	1	1	390	31	35	11	11
Smp_129350	-1.17879	0.0186714	rab, putative	81.5526	1	1	1384	4456	4463	3164	3164	1	1589	1589	86	86	11	81.5526	229	Schisto_mansoni.Chr_3	9027564	9068211	76.5761	1	1	1384	3685	3690	2603	2603	1	1288	1288	69	69	11	76.5761	190	Schisto_mansoni.Chr_3	9027564	9068211	71.4622	1	1	1384	3300	3302	2345	2345
Smp_086190	-1.17873	0.00107778	progestin and adipoq receptor family member VI, putative	133.954	1	1	1482	5565	5565	5565	5565	1	0	0	0	0	1	133.954	402	Schisto_mansoni.Chr_2	17450739	17452220	130.607	1	1	1482	4754	4754	4754	4754	1	0	0	0	0	1	130.607	347	Schisto_mansoni.Chr_2	17450739	17452220	138.084	1	1	1482	4852	4852	4852	4852
Smp_139340	-1.17869	0.00914108	rab, putative	43.334	1	1	2249	3502	4412	2713	2732	0.993045	624	624	26	27	6	43.334	138	Schisto_mansoni.Chr_7	8948548	8971356	40.715	1	1	2249	2913	3672	2241	2249	0.996443	515	515	30	30	6	40.715	114	Schisto_mansoni.Chr_7	8948548	8971356	42.8515	1	1	2249	2926	3681	2270	2285
Smp_158960	-1.17868	0.294303		9.67524	1	1	483	146	146	131	131	1	44	44	33	33	4	9.67524	35	Schisto_mansoni.SC_0167	214022	218675	12.2229	1	1	483	154	154	145	145	1	52	52	38	38	4	12.2229	36	Schisto_mansoni.SC_0167	214022	218675	11.7011	1	1	483	145	145	134	134
Smp_163490	-1.17824	0.00258233		69.4627	1	1	1743	4755	4756	3394	3394	1	501	501	606	606	6	69.4627	178	Schisto_mansoni.SC_0013	2792474	2802608	64.7984	1	1	1743	3848	3849	2774	2774	1	434	434	487	487	6	64.7984	148	Schisto_mansoni.SC_0013	2792474	2802608	65.6723	1	1	1743	3702	3702	2714	2714
Smp_150590	-1.17818	0.46633		6.26685	1	1	222	121	155	5	39	0.128205	0	0	5	5	2	6.26685	15	Schisto_mansoni.Chr_5	2002179	2004382	4.40163	1	1	222	87	108	3	24	0.125	0	0	3	4	2	4.40163	9	Schisto_mansoni.Chr_5	2002179	2004382	4.93958	1	1	222	81	106	1	26
Smp_153660	-1.17811	0.215722	cyclin d, putative	4.21734	1	1	1328	176	176	157	157	1	24	24	0	0	4	4.21734	12	Schisto_mansoni.SC_0013	1051699	1057771	4.6295	1	1	1328	165	166	151	151	1	27	27	1	1	4	4.6295	11	Schisto_mansoni.SC_0013	1051699	1057771	5.17677	1	1	1328	177	177	163	163
Smp_087320	-1.17801	0.213524	zinc finger protein, putative	1.64911	1	1	822	38	38	38	38	1	0	0	0	0	1	1.64911	5	Schisto_mansoni.Chr_4	19134046	19134867	1.53548	1	1	822	31	31	31	31	1	0	0	0	0	1	1.53548	4	Schisto_mansoni.Chr_4	19134046	19134867	1.43667	1	1	822	28	28	28	28
Smp_160420	-1.17769	0.130544	rRNA processing protein ebna1-binding protein- related	25.6639	1	1	417	302	302	300	300	1	215	215	0	0	4	25.6639	86	Schisto_mansoni.Chr_1	584018	586830	26.7528	1	1	417	275	275	274	274	1	196	196	1	1	4	26.7528	81	Schisto_mansoni.Chr_1	584018	586830	32.7702	1	1	417	324	324	324	324
Smp_167070	-1.17747	0.226785	leishmanolysin-2 (M08 family)	6.53944	1	1	1031	1571	2315	189	189	1	80	80	52	52	8	6.53944	3	Schisto_mansoni.SC_0132	377843	390659	7.66122	1	1	1031	1393	2158	194	194	1	81	81	42	42	8	7.66122	6	Schisto_mansoni.SC_0132	377843	390659	8.4271	1	1	1031	1519	2306	206	206
Smp_127750	-1.17742	0.023042	hypothetical protein	4.88154	1	1	1140	221	222	156	156	1	48	48	18	18	6	4.88154	13	Schisto_mansoni.Chr_7	1500780	1507409	5.42867	1	1	1140	204	204	152	152	1	57	57	16	16	6	5.42867	12	Schisto_mansoni.Chr_7	1500780	1507409	4.77259	1	1	1140	181	181	129	129
Smp_083410	-1.17682	0.0273697	elongation factor 1-gamma, putative	242.462	1	1	1329	9051	9051	9033	9033	1	2736	2736	75	75	5	242.462	712	Schisto_mansoni.SC_0013	2148128	2149736	263.591	1	1	1329	8631	8631	8604	8604	1	2562	2562	89	89	5	263.591	677	Schisto_mansoni.SC_0013	2148128	2149736	282.128	1	1	1329	8909	8909	8890	8890
Smp_153350	-1.17627	0.00348013	ribonuclease z, chloroplast, putative	41.2596	1	1	862	1636	1639	997	997	1	396	396	165	165	7	41.2596	115	Schisto_mansoni.Chr_5	2349827	2357393	43.1239	1	1	862	1465	1466	913	913	1	362	362	169	169	7	43.1239	109	Schisto_mansoni.Chr_5	2349827	2357393	44.8186	1	1	862	1471	1474	916	916
Smp_151110	-1.17581	0.0241397		8.84651	1	1	1617	556	561	401	401	1	239	239	48	48	14	8.84651	24	Schisto_mansoni.SC_0244	16553	37017	9.94585	1	1	1617	556	559	395	395	1	222	222	51	51	14	9.94585	24	Schisto_mansoni.SC_0244	16553	37017	8.8161	1	1	1617	482	482	338	338
Smp_126120	-1.17568	0.631289	hypothetical protein	26.1294	1	1	1398	1933	1947	1024	1024	1	476	476	107	107	9	26.1294	62	Schisto_mansoni.Chr_1	29883966	29902732	58.1311	1	1	1398	2938	2949	1996	1996	1	1040	1040	145	145	9	58.1311	140	Schisto_mansoni.Chr_1	29883966	29902732	29.0227	1	1	1398	1662	1667	962	962
Smp_158420	-1.17534	0.587722	cathepsin B-like peptidase (C01 family)	0.0743184	1	1	960	2	2	2	2	1	1	1	0	0	4	0.0743184	0	Schisto_mansoni.Chr_1	889167	892887	0.084823	1	1	960	3	3	2	2	1	0	0	0	0	4	0.084823	0	Schisto_mansoni.Chr_1	889167	892887	0.131801	1	1	960	7	7	3	3
Smp_034030	-1.17496	0.117279	hypothetical protein	7.3031	1	1	381	78	78	78	78	1	0	0	24	24	2	7.3031	21	Schisto_mansoni.Chr_1	23706692	23707076	6.73241	1	1	381	63	63	63	63	1	0	0	24	24	2	6.73241	14	Schisto_mansoni.Chr_1	23706692	23707076	5.75636	1	1	381	52	52	52	52
Smp_191670	-1.17474	0.535046		106.411	1	1	411	1225	1226	1225	1226	0.999184	33	33	33	33	2	106.411	128	Schisto_mansoni.Chr_6	18635077	18635582	127.99	1	1	411	1292	1292	1292	1292	1	37	37	23	23	2	127.99	155	Schisto_mansoni.Chr_6	18635077	18635582	175.171	1	1	411	1707	1707	1707	1707
Smp_151790	-1.17414	0.687844		0.257101	1	1	1110	0	8	0	8	0	0	0	0	0	1	0.257101	0	Schisto_mansoni.Chr_W	25800985	25802094	0.403482	1	1	1110	0	11	0	11	0	0	0	0	0	1	0.403482	0	Schisto_mansoni.Chr_W	25800985	25802094	0.189984	1	1	1110	0	5	0	5
Smp_090370	-1.17355	0.0287446	hypothetical protein	31.944	1	1	861	771	771	771	771	1	214	214	2	2	3	31.944	91	Schisto_mansoni.Chr_2.unplaced.SC_0193	149846	150779	35.3242	1	1	861	747	747	747	747	1	191	191	5	5	3	35.3242	86	Schisto_mansoni.Chr_2.unplaced.SC_0193	149846	150779	31.2037	1	1	861	637	637	637	637
Smp_136690	-1.17355	0.0396176	family S9 non-peptidase homologue (S09 family)	5.81974	1	1	1986	523	524	324	324	1	36	36	49	49	5	5.81974	16	Schisto_mansoni.Chr_1.unplaced.SC_0071	364784	390139	5.47378	1	1	1986	468	469	267	267	1	24	24	53	53	5	5.47378	13	Schisto_mansoni.Chr_1.unplaced.SC_0071	364784	390139	6.37106	1	1	1986	523	527	300	300
Smp_185420	-1.17339	0.496301		2.41967	1	1	516	34	35	34	35	0.971429	0	0	0	0	1	2.41967	0	Schisto_mansoni.Chr_3	20399595	20400110	4.49759	1	1	516	55	57	55	57	0.964912	0	0	0	0	1	4.49759	0	Schisto_mansoni.Chr_3	20399595	20400110	4.57729	1	1	516	51	56	51	56
Smp_210580	-1.17321	0.0108573	sad1/unc-84-like protein	37.6168	1	1	1101	1221	1221	1161	1161	1	310	310	3	3	4	37.6168	109	Schisto_mansoni.Chr_W	28131230	28139086	37.4978	1	1	1101	1072	1073	1014	1014	1	284	284	4	4	4	37.4978	92	Schisto_mansoni.Chr_W	28131230	28139086	40.9889	1	1	1101	1114	1114	1070	1070
Smp_194150	-1.17274	0.827484	aspartyl-tRNA synthetase, putative	3.69216	1	1	657	82	82	68	68	1	1	1	34	34	4	3.69216	9	Schisto_mansoni.SC_0273	100797	101838	0	1	0	657	0	0	0	0	#NUM!	0	0	0	0	4	0	0	Schisto_mansoni.SC_0273	100797	101838	6.29116	1	1	657	126	126	98	98
Smp_200900	-1.17266	0.128478		67.7559	1	1	159	302	302	302	302	1	0	0	0	0	1	67.7559	175	Schisto_mansoni.Chr_1	28502993	28503151	77.333	1	1	159	302	302	302	302	1	0	0	0	0	1	77.333	186	Schisto_mansoni.Chr_1	28502993	28503151	84.3528	1	1	159	318	318	318	318
Smp_119140	-1.17247	0.149183		53.6742	1	1	757	1074	1139	1074	1139	0.942932	10	10	321	344	2	53.6742	117	Schisto_mansoni.Chr_4	17533596	17534355	59.5397	1	1	757	1060	1107	1060	1107	0.957543	10	10	291	310	2	59.5397	121	Schisto_mansoni.Chr_4	17533596	17534355	47.3579	1	1	757	811	850	811	850
Smp_000270	-1.17236	0.719102		0.18053	1	1	988	5	5	5	5	1	0	0	0	0	1	0.18053	0	Schisto_mansoni.Chr_3.unplaced.SC_0044	445086	446073	0.329676	1	1	988	8	8	8	8	1	0	0	0	0	1	0.329676	1	Schisto_mansoni.Chr_3.unplaced.SC_0044	445086	446073	0.384198	1	1	988	9	9	9	9
Smp_098320	-1.17215	0.0471386	hypothetical protein	23.7819	1	1	504	954	1067	336	336	1	161	161	41	41	5	23.7819	79.5	Schisto_mansoni.Chr_1	18744585	18769082	24.8814	1	1	504	800	886	308	308	1	125	125	52	52	5	24.8814	68	Schisto_mansoni.Chr_1	18744585	18769082	23.1803	1	1	504	656	730	277	277
Smp_181700	-1.172	0.0812448	hypothetical protein	25.997	1	1	671	425	489	425	489	0.869121	0	0	5	5	2	25.997	25	Schisto_mansoni.SC_0182	170725	171401	28.3974	1	1	671	415	468	415	468	0.886752	0	0	5	5	2	28.3974	20	Schisto_mansoni.SC_0182	170725	171401	23.9482	1	1	671	338	381	338	381
Smp_018510	-1.17153	0.128591	hypothetical protein	19.9001	1	1	484	503	777	250	270	0.925926	26	26	92	94	2	19.9001	30	Schisto_mansoni.Chr_3	3626442	3630313	24.9842	1	1	484	503	797	277	297	0.93266	29	29	120	123	2	24.9842	33	Schisto_mansoni.Chr_3	3626442	3630313	24.5739	1	1	484	503	818	270	282
Smp_169020	-1.17144	0.649105	hypothetical protein	1.93349	1	1	369	68	69	20	20	1	9	9	0	0	4	1.93349	5	Schisto_mansoni.Chr_2	17493196	17501263	1.21373	1	1	369	48	49	11	11	1	2	2	0	0	4	1.21373	3	Schisto_mansoni.Chr_2	17493196	17501263	0.685795	1	1	369	40	40	6	6
Smp_098890	-1.17119	0.0728428	arginine/serine-rich splicing factor, putative	119.99	2	2	1012	3404	3404	3404	3404	1	683	683	257	257	6	119.99	293.5	Schisto_mansoni.Chr_3.unplaced.SC_0141	309855	310995	129.306	2	2	1012	3214	3214	3214	3214	1	701	701	291	291	6	129.306	280	Schisto_mansoni.Chr_3.unplaced.SC_0141	309855	310995	142.158	2	2	1012	3411	3411	3411	3411
Smp_172200	-1.17053	0.00621344	tyrosine kinase	6.83507	1	1	2406	643	653	461	461	1	80	80	9	9	7	6.83507	19	Schisto_mansoni.Chr_6	4303192	4354080	6.61662	1	1	2406	564	568	391	391	1	75	75	6	6	7	6.61662	16	Schisto_mansoni.Chr_6	4303192	4354080	6.59116	1	1	2406	488	498	376	376
Smp_179260	-1.17042	0.721286	alpha-galactosidase/alpha-n-acetylgalactosamini da se,putative	0.241733	1	1	3099	124	150	7	21	0.333333	1	1	0	0	8	0.241733	0	Schisto_mansoni.Chr_6	1244194	1265711	0.0656906	1	1	3099	111	123	1	5	0.2	0	1	0	0	8	0.0656906	0	Schisto_mansoni.Chr_6	1244194	1265711	0.299413	1	1	3099	115	141	4	22
Smp_154680	-1.17008	0.0242103	glycosyltransferase 14 family member, putative	11.962	1	1	1339	535	535	449	449	1	29	29	10	10	2	11.962	35	Schisto_mansoni.Chr_1	35655863	35660856	10.9465	1	1	1339	425	425	360	360	1	31	31	4	4	2	10.9465	27	Schisto_mansoni.Chr_1	35655863	35660856	12.0639	1	1	1339	431	432	383	383
Smp_187740	-1.1699	0.774152	hypothetical protein	1.35286	1	1	501	19	19	19	19	1	10	10	0	0	3	1.35286	4	Schisto_mansoni.Chr_W	11165398	11165969	0.812676	1	1	501	10	10	10	10	1	3	3	0	0	3	0.812676	2	Schisto_mansoni.Chr_W	11165398	11165969	0.252553	1	1	501	3	3	3	3
Smp_008660	-1.16926	0.0260313	gelsolin, putative	398.199	2	2	1895	22656	22681	21153	21153	1	13648	13648	31	31	11	398.199	1484	Schisto_mansoni.Chr_4	9076274	9108810	371.656	2	2	1895	18435	18450	17298	17298	1	10913	10913	29	29	11	371.656	1216	Schisto_mansoni.Chr_4	9076274	9108810	405.049	2	2	1895	19337	19355	18199	18199
Smp_200380	-1.1691	0.103044		12.6054	1	1	1398	494	494	494	494	1	0	0	0	0	1	12.6054	39	Schisto_mansoni.Chr_1	17541277	17542674	13.892	1	1	1398	477	477	477	477	1	0	0	0	0	1	13.892	36	Schisto_mansoni.Chr_1	17541277	17542674	15.0544	1	1	1398	499	499	499	499
Smp_095190	-1.16903	0.0383397	apoptosis regulator bax, putative	26.279	1	1	600	1220	1225	442	442	1	181	181	64	64	4	26.279	69	Schisto_mansoni.Chr_W	16834051	16840482	25.379	1	1	600	1067	1069	374	374	1	161	161	43	43	4	25.379	58	Schisto_mansoni.Chr_W	16834051	16840482	24.6029	1	1	600	979	980	350	350
Smp_153490	-1.16885	0.0596851	GDP-mannose 4,6-dehydratase	48.5358	1	1	1101	1754	1754	1498	1498	1	922	922	179	179	9	48.5358	144	Schisto_mansoni.Chr_W	31333379	31338682	51.2174	1	1	1101	1593	1593	1385	1385	1	885	885	161	161	9	51.2174	133	Schisto_mansoni.Chr_W	31333379	31338682	49.9528	1	1	1101	1502	1502	1304	1304
Smp_161770	-1.16871	0.823021	hypothetical protein	0.294817	1	1	363	3	3	3	3	1	0	0	0	0	1	0.294817	1	Schisto_mansoni.Chr_1	25290550	25290912	0.560813	1	1	363	5	5	5	5	1	0	0	0	0	1	0.560813	1	Schisto_mansoni.Chr_1	25290550	25290912	1.16188	1	1	363	10	10	10	10
Smp_176270	-1.16863	0.00733273	syntaxin, putative	21.4272	1	1	1212	1714	2092	728	728	1	129	129	115	115	6	21.4272	62	Schisto_mansoni.Chr_6	15647067	15683108	20.1224	1	1	1212	1469	1865	599	599	1	112	112	101	101	6	20.1224	51	Schisto_mansoni.Chr_6	15647067	15683108	19.5571	1	1	1212	1307	1684	562	562
Smp_212210	-1.16851	0.0483786	chromatin-specific transcription elongation factor 140 kDa subunit (M24 family)	29.152	1	1	651	532	532	532	532	1	266	266	1	1	4	29.152	83	Schisto_mansoni.SC_0253	37857	38617	25.2671	1	1	651	404	404	404	404	1	190	190	3	3	4	25.2671	65	Schisto_mansoni.SC_0253	37857	38617	28.7007	1	1	651	443	443	443	443
Smp_000370	-1.16842	0.354957	hypothetical protein	4.61077	1	1	294	208	228	38	38	1	0	0	29	29	2	4.61077	5	Schisto_mansoni.Chr_3.unplaced.SC_0044	1771	19942	5.95492	1	1	294	196	228	43	43	1	0	0	34	34	2	5.95492	2	Schisto_mansoni.Chr_3.unplaced.SC_0044	1771	19942	6.0252	1	1	294	191	212	42	42
Smp_042140	-1.16831	0.000647909	dynein light chain, putative	169.766	1	1	780	5058	5152	3712	3712	1	1968	1968	587	587	6	169.766	527.5	Schisto_mansoni.Chr_4	22601096	22638747	175.858	1	1	780	4609	4702	3369	3369	1	1832	1832	523	523	6	175.858	472.5	Schisto_mansoni.Chr_4	22601096	22638747	172.545	1	1	780	4304	4389	3191	3191
Smp_157800	-1.16809	0.00341383	DEAD box ATP-dependent RNA helicase, putative	15.8859	1	1	2149	1087	1116	941	957	0.983281	307	307	16	16	7	15.8859	50	Schisto_mansoni.Chr_W	34355089	34365815	16.4452	1	1	2149	956	985	844	868	0.97235	262	262	22	22	7	16.4452	45	Schisto_mansoni.Chr_W	34355089	34365815	16.113	1	1	2149	927	947	805	821
Smp_179180	-1.16763	0.0323712	ribosomal protein S2, eukaryotic and archaeal form, putative	290.643	1	1	929	7623	7624	7569	7569	1	2784	2784	23	23	5	290.643	898	Schisto_mansoni.Chr_1	59034129	59037393	296.225	1	1	929	6809	6814	6757	6759	0.999704	2488	2488	15	17	5	296.225	808	Schisto_mansoni.Chr_1	59034129	59037393	333.87	1	1	929	7403	7404	7353	7354
Smp_137120	-1.16758	0.0652724	hypothetical protein	5.44193	1	1	1960	320	321	299	299	1	0	0	1	1	2	5.44193	16	Schisto_mansoni.Chr_3.unplaced.SC_0233	77912	88093	4.6116	1	1	1960	239	240	222	222	1	0	0	0	0	2	4.6116	11	Schisto_mansoni.Chr_3.unplaced.SC_0233	77912	88093	4.99231	1	1	1960	252	254	232	232
Smp_000610	-1.16679	0.127879	hypothetical protein	11.6786	1	1	168	177	188	55	55	1	0	0	44	44	3	11.6786	21	Schisto_mansoni.SC_0113	304891	313605	10.6635	1	1	168	193	207	44	44	1	0	0	31	31	3	10.6635	20.5	Schisto_mansoni.SC_0113	304891	313605	13.0546	1	1	168	173	185	52	52
Smp_150260	-1.16676	0.0926426	protein kinase	10.8587	1	1	864	273	273	263	263	1	145	145	3	3	6	10.8587	31	Schisto_mansoni.SC_0377	25318	32480	8.90642	1	1	864	193	193	189	189	1	115	115	2	2	6	8.90642	22	Schisto_mansoni.SC_0377	25318	32480	9.86069	1	1	864	204	204	202	202
Smp_173390	-1.16639	0.00344144	ribosomal protein L5, putative	48.5453	1	1	1272	2147	2779	1731	1731	1	537	537	369	369	8	48.5453	133	Schisto_mansoni.Chr_1	29445949	29466593	46.1245	1	1	1272	1805	2347	1441	1441	1	443	443	310	310	8	46.1245	112	Schisto_mansoni.Chr_1	29445949	29466593	45.1938	1	1	1272	1690	2181	1363	1363
Smp_181470	-1.16607	0.0217827	recs1 protein (responsive to centrifugal force and shear stressprotein 1 protein), putative	65.8296	1	1	1080	2214	2253	1993	1993	1	1067	1067	17	17	8	65.8296	189	Schisto_mansoni.Chr_3	10871086	10888586	64.9556	1	1	1080	1922	1970	1723	1723	1	914	914	10	10	8	64.9556	162	Schisto_mansoni.Chr_3	10871086	10888586	73.3011	1	1	1080	2046	2093	1877	1877
Smp_198880	-1.16606	0.919118	thyroid hormone receptor-associated protein, putative	0	1	0	135	0	0	0	0	#NUM!	0	0	0	0	1	0	0	Schisto_mansoni.SC_0129	196917	197051	0.301593	1	1	135	1	1	1	1	1	0	0	0	0	1	0.301593	1	Schisto_mansoni.SC_0129	196917	197051	0	1	0	135	0	0	0	0
Smp_204440	-1.16606	0.919118		0	1	0	177	0	0	0	0	#NUM!	0	0	0	0	1	0	0	Schisto_mansoni.SC_0037	2070581	2070757	0.230029	1	1	177	1	1	1	1	1	0	0	0	0	1	0.230029	1	Schisto_mansoni.SC_0037	2070581	2070757	0	1	0	177	0	0	0	0
Smp_157580	-1.16606	0.919118		0	1	0	189	0	0	0	0	#NUM!	0	0	0	0	1	0	0	Schisto_mansoni.Chr_3	6928082	6928270	0.215424	1	1	189	0	1	0	1	0	0	0	0	0	1	0.215424	1	Schisto_mansoni.Chr_3	6928082	6928270	0	1	0	189	0	0	0	0
Smp_183250	-1.16606	0.919118	maguk P55 subfamily member 3,5, putative	0	1	0	189	0	0	0	0	#NUM!	0	0	0	0	1	0	0	Schisto_mansoni.Chr_W	50162835	50163023	0.215424	1	1	189	0	1	0	1	0	0	0	0	0	1	0.215424	1	Schisto_mansoni.Chr_W	50162835	50163023	0	1	0	189	0	0	0	0
Smp_168760	-1.16561	0.0304477	hypothetical protein	27.4045	1	1	1290	1219	1234	991	991	1	225	225	237	237	7	27.4045	73	Schisto_mansoni.Chr_3	14618783	14634346	31.278	1	1	1290	1245	1261	991	991	1	207	207	250	250	7	31.278	72	Schisto_mansoni.Chr_3	14618783	14634346	30.4716	1	1	1290	1116	1125	932	932
Smp_046090	-1.16555	0.00845303	chaperonin containing t-complex protein 1, theta subunit, tcpq, putative	119.724	2	2	2204	7514	7626	7397	7397	1	3622	3622	20	20	12	119.724	395.5	Schisto_mansoni.Chr_W	37387479	37401436	123.217	2	2	2204	6755	6855	6670	6670	1	3338	3338	14	14	12	123.217	354	Schisto_mansoni.Chr_W	37387479	37401436	131.409	2	2	2204	6943	7048	6867	6867
Smp_123970	-1.16549	0.827368		0.653348	1	0	273	12	12	5	5	1	0	0	5	5	3	0.653348	0	Schisto_mansoni.Chr_1	8131696	8137960	0.447418	1	0	273	27	27	3	3	1	0	0	3	3	3	0.447418	0	Schisto_mansoni.Chr_1	8131696	8137960	0	1	0	273	20	20	0	0
Smp_168550	-1.16548	0.0335172	steroid dehydrogenase, putative	53.1904	1	1	951	1503	1560	1368	1418	0.964739	374	379	7	7	3	53.1904	29	Schisto_mansoni.Chr_3.unplaced.SC_0083	624795	631052	49.5345	1	1	951	1231	1271	1119	1157	0.967156	284	286	11	12	3	49.5345	47	Schisto_mansoni.Chr_3.unplaced.SC_0083	624795	631052	46.3896	1	1	951	1130	1159	1019	1046
Smp_014270	-1.16536	0.447318	hypothetical protein	1.96139	1	1	291	47	53	10	16	0.625	0	3	10	11	3	1.96139	1	Schisto_mansoni.Chr_1	19262083	19266355	2.79828	1	1	291	60	69	12	20	0.6	1	2	11	13	3	2.79828	0	Schisto_mansoni.Chr_1	19262083	19266355	2.89872	1	1	291	45	51	15	20
Smp_080530	-1.16526	0.0237288	replication protein A, putative	53.4868	1	1	795	1575	1587	1192	1192	1	571	571	63	63	6	53.4868	167	Schisto_mansoni.Chr_W	17082626	17086511	57.0011	1	1	795	1453	1465	1113	1113	1	537	537	48	48	6	57.0011	151	Schisto_mansoni.Chr_W	17082626	17086511	61.3282	1	1	795	1469	1480	1156	1156
Smp_077670	-1.16521	0.0127137	hypothetical protein	7.09721	1	1	1528	438	440	304	304	1	100	100	4	4	6	7.09721	21	Schisto_mansoni.Chr_6	19351774	19361965	6.6082	1	1	1528	377	378	248	248	1	79	79	9	9	6	6.6082	16	Schisto_mansoni.Chr_6	19351774	19361965	6.51416	1	1	1528	327	328	236	236
Smp_050540	-1.16446	0.000965419	orotate phosphoribosyltransferase	20.3882	1	1	1356	883	885	775	775	1	425	425	14	14	9	20.3882	57.5	Schisto_mansoni.Chr_4	24963701	24979624	20.7178	1	1	1356	810	811	690	690	1	407	407	6	6	9	20.7178	54	Schisto_mansoni.Chr_4	24963701	24979624	21.1504	1	1	1356	761	762	680	680
Smp_203170	-1.16423	0.054815		110.159	1	1	159	491	491	491	491	1	0	0	0	0	1	110.159	322	Schisto_mansoni.Chr_6	12141428	12141586	122.145	1	1	159	477	477	477	477	1	0	0	0	0	1	122.145	311	Schisto_mansoni.Chr_6	12141428	12141586	125.203	1	1	159	472	472	472	472
Smp_154280	-1.16404	0.0132369		30.8313	1	1	1201	1093	1096	1038	1038	1	269	269	17	17	5	30.8313	89	Schisto_mansoni.Chr_6	12339471	12345711	28.8497	1	1	1201	914	916	851	851	1	230	230	18	18	5	28.8497	74	Schisto_mansoni.Chr_6	12339471	12345711	28.7966	1	1	1201	871	872	820	820
Smp_063350	-1.164	0.0580645	60S ribosomal protein L27e, putative	385.896	1	1	499	5398	5398	5398	5398	1	1281	1281	1	1	3	385.896	1279	Schisto_mansoni.Chr_3	16210687	16211253	387.731	1	1	499	4752	4752	4752	4752	1	1122	1122	3	3	3	387.731	1152	Schisto_mansoni.Chr_3	16210687	16211253	448.135	1	1	499	5302	5302	5302	5302
Smp_158840	-1.16397	0.0669552	hypothetical protein	9.87586	1	1	1788	620	623	495	495	1	225	225	11	11	11	9.87586	30	Schisto_mansoni.Chr_4	1108362	1127542	11.8866	1	1	1788	621	622	522	522	1	235	235	24	24	11	11.8866	32	Schisto_mansoni.Chr_4	1108362	1127542	11.3697	1	1	1788	570	572	482	482
Smp_190070	-1.16387	0.772842	hypothetical protein	0.399695	1	1	357	4	4	4	4	1	4	4	0	0	2	0.399695	0	Schisto_mansoni.Chr_W	36188139	36189736	0.456191	1	1	357	4	5	4	4	1	4	4	0	0	2	0.456191	0	Schisto_mansoni.Chr_W	36188139	36189736	0.354424	1	1	357	3	4	3	3
Smp_120350	-1.16386	0.0340596		29.25	1	1	1694	1540	1567	1389	1389	1	735	735	30	30	11	29.25	83	Schisto_mansoni.SC_0251	52029	67738	31.3415	1	1	1694	1452	1469	1304	1304	1	702	702	35	35	11	31.3415	79	Schisto_mansoni.SC_0251	52029	67738	32.5909	1	1	1694	1438	1456	1309	1309
Smp_130270	-1.16365	0.102743	hypothetical protein	10.1821	2	2	1009	454	454	288	288	1	151	151	32	32	9	10.1821	29	Schisto_mansoni.Chr_3	26463476	26475242	9.92656	2	2	1009	404	404	246	246	1	125	125	32	32	9	9.92656	24	Schisto_mansoni.Chr_3	26463476	26475242	11.5787	2	2	1009	406	406	277	277
Smp_139650	-1.16357	0.00367153	hypothetical protein	39.5304	1	1	1831	2265	2273	2029	2029	1	525	525	28	28	5	39.5304	116	Schisto_mansoni.Chr_W	51596926	51607493	42.1382	1	1	1831	2160	2166	1895	1895	1	455	455	21	21	5	42.1382	98	Schisto_mansoni.Chr_W	51596926	51607493	40.541	1	1	1831	1978	1983	1760	1760
Smp_138850	-1.16353	0.0493526	SH2A , putative	18.5466	1	1	879	1246	1246	457	457	1	155	155	41	41	5	18.5466	53	Schisto_mansoni.Chr_6	5510317	5520369	19.5932	1	1	879	1118	1118	423	423	1	142	142	37	37	5	19.5932	51	Schisto_mansoni.Chr_6	5510317	5520369	17.7534	1	1	879	946	946	370	370
Smp_067520	-1.16323	0.0338369	jun-related protein	18.0982	1	1	2998	1739	1739	1521	1521	1	120	120	15	15	4	18.0982	47	Schisto_mansoni.Chr_W	10806812	10820389	16.6228	1	1	2998	1397	1397	1224	1224	1	81	81	13	13	4	16.6228	38	Schisto_mansoni.Chr_W	10806812	10820389	15.9111	1	1	2998	1261	1261	1131	1131
Smp_210080	-1.16314	0.00576846	adapter-related protein complex 3, beta subunit	12.5493	1	1	1788	848	857	629	629	1	195	195	45	45	8	12.5493	37	Schisto_mansoni.Chr_7	3963195	3988880	12.843	1	1	1788	774	788	564	564	1	197	197	46	46	8	12.843	33	Schisto_mansoni.Chr_7	3963195	3988880	13.0445	1	1	1788	740	745	553	553
Smp_150910	-1.16287	0.0609736		2.43701	1	1	849	50	58	50	58	0.862069	50	50	0	0	3	2.43701	2	Schisto_mansoni.Chr_3	10249053	10249966	2.63761	1	1	849	47	55	47	55	0.854545	47	47	0	0	3	2.63761	2	Schisto_mansoni.Chr_3	10249053	10249966	2.18582	1	1	849	33	44	33	44
Smp_175860	-1.1628	0.0560263	hypothetical protein	2.13213	1	1	4417	331	335	264	264	1	75	75	14	14	17	2.13213	6	Schisto_mansoni.SC_0013	2578404	2610300	2.14775	1	1	4417	286	288	233	233	1	70	70	13	13	17	2.14775	5	Schisto_mansoni.SC_0013	2578404	2610300	2.31078	1	1	4417	301	302	242	242
Smp_142760	-1.16273	0.0330489		8.66865	1	1	679	388	406	165	165	1	28	28	49	49	4	8.66865	21	Schisto_mansoni.Chr_W	43210392	43225222	9.11441	1	1	679	374	397	152	152	1	22	22	54	54	4	9.11441	21	Schisto_mansoni.Chr_W	43210392	43225222	9.75213	1	1	679	344	360	157	157
Smp_172880	-1.16264	0.0061446	hypothetical protein	11.5595	1	1	287	97	97	93	93	1	27	27	8	8	2	11.5595	31	Schisto_mansoni.Chr_W	19049499	19051139	11.6329	1	1	287	85	85	82	82	1	21	21	5	5	2	11.6329	33	Schisto_mansoni.Chr_W	19049499	19051139	12.3443	1	1	287	86	86	84	84
Smp_136650	-1.16263	0.231721	hypothetical protein	17.6669	1	1	1052	564	565	521	521	1	92	92	1	1	2	17.6669	46	Schisto_mansoni.Chr_6	16091593	16102504	13.1976	1	1	1052	365	367	341	341	1	60	60	0	0	2	13.1976	24	Schisto_mansoni.Chr_6	16091593	16102504	14.6735	1	1	1052	384	384	366	366
Smp_140510	-1.16227	0.011783	transmembrane protein 56 , putative	205.705	1	1	1049	6653	6653	6049	6049	1	1565	1565	102	102	4	205.705	609	Schisto_mansoni.Chr_1	23478967	23482487	188.943	1	1	1049	5422	5422	4868	4868	1	1218	1218	92	92	4	188.943	482	Schisto_mansoni.Chr_1	23478967	23482487	207.465	1	1	1049	5705	5705	5160	5160
Smp_166120	-1.16215	0.0166699	hypothetical protein	58.791	1	1	645	1274	1274	1063	1063	1	782	782	19	19	5	58.791	198	Schisto_mansoni.Chr_3.unplaced.SC_0220	10217	18470	57.3167	1	1	645	1131	1131	908	908	1	701	701	27	27	5	57.3167	178	Schisto_mansoni.Chr_3.unplaced.SC_0220	10217	18470	63.6897	1	1	645	1184	1184	974	974
Smp_196720	-1.16199	0.00902684	atpase, class VI, type 11c, putative	29.1477	1	1	995	963	1104	813	813	1	195	195	15	15	4	29.1477	97	Schisto_mansoni.Chr_1	12985951	13024329	31.3444	1	1	995	881	1017	766	766	1	155	155	21	21	4	31.3444	85	Schisto_mansoni.Chr_1	12985951	13024329	31.5793	1	1	995	853	966	745	745
Smp_164810	-1.16193	0.148309	tyrosine kinase	13.6248	1	1	3333	1663	1711	1243	1273	0.976434	396	396	32	33	14	13.6248	36	Schisto_mansoni.SC_0181	129248	184457	12.9975	1	1	3333	1369	1415	1043	1064	0.980263	329	329	25	25	14	12.9975	30	Schisto_mansoni.SC_0181	129248	184457	10.6801	1	1	3333	1053	1081	831	844
Smp_135980	-1.16185	0.0324272	similar to 16 kDa calcium-binding protein	57.5574	1	1	727	1236	1241	1173	1173	1	512	512	6	6	3	57.5574	173	Schisto_mansoni.Chr_W	35707570	35723241	54.4361	1	1	727	1030	1031	972	972	1	394	394	4	4	3	54.4361	141	Schisto_mansoni.Chr_W	35707570	35723241	60.683	1	1	727	1113	1116	1046	1046
Smp_072740	-1.16179	0.000827386	Phytochelatin synthase, putative	20.6641	1	1	2643	1658	1668	1531	1531	1	206	206	18	18	5	20.6641	59	Schisto_mansoni.SC_0049	1143984	1157735	21.2433	1	1	2643	1503	1510	1379	1379	1	190	190	13	13	5	21.2433	54	Schisto_mansoni.SC_0049	1143984	1157735	20.3621	1	1	2643	1372	1379	1276	1276
Smp_068700	-1.16166	0.490953	hypothetical protein	1.29901	1	1	357	20	20	13	13	1	1	1	1	1	2	1.29901	4	Schisto_mansoni.Chr_5.unplaced.SC_0195	281463	295760	0.912382	1	1	357	16	16	8	8	1	0	0	0	0	2	0.912382	2	Schisto_mansoni.Chr_5.unplaced.SC_0195	281463	295760	1.65398	1	1	357	19	19	14	14
Smp_033000	-1.16132	0.361742	calcium-binding protein, putative	3.19294	1	1	324	29	29	29	29	1	13	13	0	0	2	3.19294	9	Schisto_mansoni.Chr_W	15333249	15333663	4.02124	1	1	324	32	32	32	32	1	12	12	0	0	2	4.02124	11	Schisto_mansoni.Chr_W	15333249	15333663	5.07679	1	1	324	39	39	39	39
Smp_136550	-1.1613	0.0434554	tyrosine kinase	34.8129	1	1	4107	4317	4340	4008	4008	1	1148	1148	34	34	14	34.8129	97	Schisto_mansoni.SC_0013	341699	382350	32.7644	1	1	4107	3557	3584	3305	3305	1	936	936	25	25	14	32.7644	78	Schisto_mansoni.SC_0013	341699	382350	30.1407	1	1	4107	3120	3137	2935	2935
Smp_006730	-1.16124	0.0224739	fasting-inducible integral membrane protein tm6p1-related	183.708	1	1	948	5481	5481	4882	4882	1	3436	3436	88	88	8	183.708	566.5	Schisto_mansoni.Chr_1	24058965	24075277	168.272	1	1	948	4360	4360	3918	3918	1	2718	2718	47	47	8	168.272	473.5	Schisto_mansoni.Chr_1	24058965	24075277	172.309	1	1	948	4241	4241	3873	3873
Smp_125740	-1.16117	0.146392		34.6594	1	1	528	620	635	513	513	1	132	132	6	6	3	34.6594	104.5	Schisto_mansoni.Chr_1	24665124	24672961	42.72	1	1	528	663	677	554	554	1	138	138	4	4	3	42.72	119	Schisto_mansoni.Chr_1	24665124	24672961	35.2269	1	1	528	516	522	441	441
Smp_016200	-1.16111	0.0023854	flotillin-1, putative	36.068	3	2	1715	1149	1797	1149	1734	0.66263	1149	1168	0	5	12	36.068	81	Schisto_mansoni.Chr_1	1950101	1970724	36.1569	3	1	1715	1052	1576	1052	1523	0.690742	1052	1062	0	0	12	36.1569	67	Schisto_mansoni.Chr_1	1950101	1970724	37.1841	3	2	1715	1015	1549	1015	1512
Smp_016780	-1.16107	0.0749008	tubulin alpha chain, putative	198.619	1	1	1453	8090	8090	8090	8090	1	977	977	14	14	3	198.619	590	Schisto_mansoni.Chr_6	17167149	17168681	208.955	1	1	1453	7457	7457	7457	7457	1	899	899	6	6	3	208.955	540	Schisto_mansoni.Chr_6	17167149	17168681	227.544	1	1	1453	7839	7839	7839	7839
Smp_204680	-1.16103	0.132702		15.0619	1	1	270	258	259	114	114	1	72	72	4	4	2	15.0619	39	Schisto_mansoni.SC_0142	549075	552795	18.6988	1	1	270	255	263	124	124	1	69	69	7	7	2	18.6988	49	Schisto_mansoni.SC_0142	549075	552795	18.1202	1	1	270	274	280	116	116
Smp_063030	-1.16055	0.170432	hypothetical protein	4.22723	1	1	2000	237	237	237	237	1	0	0	0	0	1	4.22723	12	Schisto_mansoni.SC_0041	1738864	1740863	4.13258	1	1	2000	203	203	203	203	1	0	0	0	0	1	4.13258	10	Schisto_mansoni.SC_0041	1738864	1740863	4.34417	1	1	2000	206	206	206	206
Smp_050890	-1.15995	0.0264225	hypothetical protein	23.221	1	1	3286	2486	2547	2139	2139	1	880	880	47	47	16	23.221	61	Schisto_mansoni.Chr_6	13943940	13975131	21.4974	1	1	3286	2052	2102	1735	1735	1	710	710	26	26	16	21.4974	54	Schisto_mansoni.Chr_6	13943940	13975131	20.2539	1	1	3286	1838	1883	1578	1578
Smp_157400	-1.15985	0.106121	family M13 unassigned peptidase (M13 family)	7.96113	1	1	820	306	316	183	183	1	86	86	13	13	6	7.96113	24.5	Schisto_mansoni.Chr_2	21895980	21909952	9.23536	1	1	820	302	312	186	186	1	67	67	29	29	6	9.23536	23	Schisto_mansoni.Chr_2	21895980	21909952	7.7152	1	1	820	265	275	150	150
Smp_188900	-1.15975	0.293994		44.7011	1	1	324	77	406	77	406	0.189655	0	0	0	0	1	44.7011	143	Schisto_mansoni.Chr_1	51090668	51090991	54.6637	1	1	324	80	435	80	435	0.183908	0	0	0	0	1	54.6637	150	Schisto_mansoni.Chr_1	51090668	51090991	41.9161	1	1	324	47	322	47	322
Smp_101450	-1.15974	0.0105681	60S ribosomal protein L7, putative	400.115	1	1	874	9811	9811	9803	9803	1	4517	4517	27	27	4	400.115	1244.5	Schisto_mansoni.SC_0270	9139	11375	391.265	1	1	874	8405	8405	8399	8399	1	3784	3784	29	29	4	391.265	1084.5	Schisto_mansoni.SC_0270	9139	11375	431.705	1	1	874	8953	8953	8946	8946
Smp_033020	-1.15973	0.000683762	anti-silencing protein, putative	64.9836	1	1	942	2470	2482	1716	1716	1	337	337	25	25	3	64.9836	193	Schisto_mansoni.Chr_W	15369612	15379892	67.8584	1	1	942	2212	2225	1570	1570	1	294	294	29	29	3	67.8584	177	Schisto_mansoni.Chr_W	15369612	15379892	67.6524	1	1	942	2018	2026	1511	1511
Smp_048660	-1.15938	0.0344717	nucleolar protein NOP56, putative	44.8723	1	1	1966	2532	2532	2473	2473	1	483	483	7	7	5	44.8723	133	Schisto_mansoni.Chr_W	19826813	19833688	50.1793	1	1	1966	2470	2470	2423	2423	1	430	430	7	7	5	50.1793	125	Schisto_mansoni.Chr_W	19826813	19833688	51.487	1	1	1966	2445	2445	2400	2400
Smp_178180	-1.15835	0.647965	hypothetical protein	0.914688	1	1	312	8	8	8	8	1	0	0	7	7	2	0.914688	1	Schisto_mansoni.SC_0461	3544	3948	0.521988	1	1	312	4	4	4	4	1	0	0	3	3	2	0.521988	0	Schisto_mansoni.SC_0461	3544	3948	0.405542	1	0	312	3	3	3	3
Smp_135970	-1.15823	0.125721	Polcalcin Che a 3 (Calcium-binding pollen allergen Che a 3), putative	50.9133	1	1	213	315	315	304	304	1	231	231	0	0	2	50.9133	138	Schisto_mansoni.Chr_W	35738034	35742407	55.0513	1	1	213	293	293	288	288	1	213	213	1	1	2	55.0513	132	Schisto_mansoni.Chr_W	35738034	35742407	56.8293	1	1	213	298	298	287	287
Smp_142300	-1.15782	0.00678326	polypyrimidine tract binding protein, putative	34.2487	1	1	2054	2321	2325	1972	1972	1	916	916	46	46	12	34.2487	97	Schisto_mansoni.Chr_W	47316182	47336116	32.1518	1	1	2054	1947	1949	1622	1622	1	758	758	46	46	12	32.1518	80	Schisto_mansoni.Chr_W	47316182	47336116	35.0307	1	1	2054	1961	1967	1706	1706
Smp_173700	-1.15771	0.0588172	Structural maintenance of chromosome 3 (Chondroitin sulfate proteoglycan 6) (Chromosome- associated polypeptide) (hCAP) (Bamacan) (Basement membrane-associated chondroitin proteoglycan), putative	10.701	1	1	4107	1456	1461	1232	1232	1	306	306	93	93	16	10.701	27	Schisto_mansoni.SC_0148	627924	662971	11.2717	1	1	4107	1336	1342	1137	1137	1	298	298	81	81	16	11.2717	25	Schisto_mansoni.SC_0148	627924	662971	10.6802	1	1	4107	1201	1208	1040	1040
Smp_137790	-1.15755	0.0230972	androgen induced inhibitor of proliferation (as3) / pds5-related	9.66041	1	1	2271	668	668	615	615	1	123	123	14	14	10	9.66041	25	Schisto_mansoni.Chr_3	4734865	4745778	10.3805	1	1	2271	638	638	579	579	1	110	110	20	20	10	10.3805	23	Schisto_mansoni.Chr_3	4734865	4745778	10.0845	1	1	2271	585	585	543	543
Smp_102510	-1.15737	0.0299703	peripheral-type benzodiazepine receptor, putative	46.7252	1	1	865	1813	1828	1133	1133	1	242	242	49	49	3	46.7252	137	Schisto_mansoni.Chr_5	506338	514428	49.47	1	1	865	1669	1683	1051	1051	1	219	219	49	49	3	49.47	142	Schisto_mansoni.Chr_5	506338	514428	52.5621	1	1	865	1639	1652	1078	1078
Smp_092950	-1.15737	0.0285517	hypothetical protein	13.5549	1	1	5574	2504	2533	2118	2118	1	444	444	98	98	16	13.5549	36	Schisto_mansoni.Chr_1	684937	737151	13.9369	1	1	5574	2249	2273	1908	1908	1	370	370	85	85	16	13.9369	31	Schisto_mansoni.Chr_1	684937	737151	12.5152	1	1	5574	1908	1919	1654	1654
Smp_093710	-1.15733	0.0563193	hypothetical protein	10.8592	1	1	1383	421	421	421	421	1	0	0	0	0	1	10.8592	30	Schisto_mansoni.Chr_1	53770020	53771402	11.5403	1	1	1383	392	392	392	392	1	0	0	0	0	1	11.5403	28	Schisto_mansoni.Chr_1	53770020	53771402	11.4666	1	1	1383	376	376	376	376
Smp_139350	-1.15722	0.510361	Nuclease sbcCD subunit C, putative	4.06059	1	1	3189	1364	2844	363	363	1	113	113	47	47	19	4.06059	10	Schisto_mansoni.Chr_7	8991089	9072913	5.33675	1	1	3189	1384	2806	418	418	1	127	127	73	73	19	5.33675	12	Schisto_mansoni.Chr_7	8991089	9072913	3.04189	1	1	3189	1058	2512	230	230
Smp_098330	-1.15705	0.00205612	nucleolar protein family A member, putative	112.665	1	1	695	2270	2270	2195	2195	1	222	222	3	3	2	112.665	391	Schisto_mansoni.Chr_1	18770869	18773662	107.089	1	1	695	1888	1888	1828	1828	1	198	198	14	14	2	107.089	335	Schisto_mansoni.Chr_1	18770869	18773662	112.572	1	1	695	1937	1937	1855	1855
Smp_139170	-1.15682	0.783511		0.561777	1	1	381	10	10	6	6	1	0	0	2	2	2	0.561777	1	Schisto_mansoni.Chr_1.unplaced.SC_0071	1056099	1060769	0.213727	1	0	381	6	6	2	2	1	0	0	2	2	2	0.213727	0	Schisto_mansoni.Chr_1.unplaced.SC_0071	1056099	1060769	0.774895	1	1	381	9	9	7	7
Smp_127610	-1.15682	0.599835	Mername-AA213 putative peptidase (M14 family)	0.171504	1	1	3120	118	123	15	15	1	0	0	2	2	20	0.171504	0	Schisto_mansoni.SC_0201	117603	176779	0.182696	1	1	3120	138	139	14	14	1	0	0	2	2	20	0.182696	0	Schisto_mansoni.SC_0201	117603	176779	0.121663	1	1	3120	67	69	9	9
Smp_120980	-1.15681	0.32675	inhibitor of growth family, member 5, putative	5.83638	1	1	654	104	110	104	107	0.971963	104	104	0	1	4	5.83638	7.5	Schisto_mansoni.Chr_3	19759968	19766416	6.66133	1	1	654	104	107	104	107	0.971963	104	104	0	0	4	6.66133	13	Schisto_mansoni.Chr_3	19759968	19766416	8.3192	1	1	654	122	129	122	129
Smp_064530	-1.15669	0.0185147		52.0245	1	1	901	1357	1358	1314	1314	1	673	673	53	53	6	52.0245	169	Schisto_mansoni.Chr_5	5080875	5087878	48.2616	1	1	901	1106	1107	1068	1068	1	537	537	37	37	6	48.2616	132	Schisto_mansoni.Chr_5	5080875	5087878	54.2068	1	1	901	1185	1186	1158	1158
Smp_202130	-1.15661	0.00173632		206.809	1	1	306	1924	1924	1774	1774	1	299	299	5	5	2	206.809	649	Schisto_mansoni.Chr_3	17582409	17587948	215.284	1	1	306	1762	1762	1618	1618	1	280	280	5	5	2	215.284	593.5	Schisto_mansoni.Chr_3	17582409	17587948	218.187	1	1	306	1683	1683	1583	1583
Smp_031730	-1.15636	0.018887	signalase (S26 family)	72.2686	1	1	889	1995	1997	1801	1801	1	1157	1157	31	31	6	72.2686	229	Schisto_mansoni.Chr_7	9166902	9171804	78.8654	1	1	889	1890	1892	1722	1722	1	1072	1072	24	24	6	78.8654	208	Schisto_mansoni.Chr_7	9166902	9171804	79.9407	1	1	889	1817	1819	1685	1685
Smp_200890	-1.15629	0.0350969		8.80117	1	1	381	94	94	94	94	1	0	0	0	0	1	8.80117	24	Schisto_mansoni.Chr_1	26726874	26727254	10.0452	1	1	381	94	94	94	94	1	0	0	0	0	1	10.0452	26	Schisto_mansoni.Chr_1	26726874	26727254	9.40944	1	1	381	85	85	85	85
Smp_142690	-1.15628	0.0269098	nAChR subunit (ShAR1-beta2-like)	18.9877	1	1	2262	1487	1491	1204	1204	1	601	601	135	135	14	18.9877	44	Schisto_mansoni.Chr_W	43496409	43522297	20.6095	1	1	2262	1399	1400	1145	1145	1	539	539	145	145	14	20.6095	39	Schisto_mansoni.Chr_W	43496409	43522297	21.4425	1	1	2262	1382	1386	1150	1150
Smp_096450	-1.15609	0.00382457	116 kD U5 small nuclear ribonucleoprotein component, putative	69.7138	2	2	3126	6439	6457	6109	6109	1	2940	2940	78	78	21	69.7138	197	Schisto_mansoni.Chr_W	14438004	14464712	68.4836	2	2	3126	5554	5575	5258	5258	1	2508	2508	55	55	21	68.4836	169	Schisto_mansoni.Chr_W	14438004	14464712	71.2115	2	2	3126	5559	5578	5278	5278
Smp_105970	-1.15594	0.041146	hypothetical protein	162.375	2	2	1999	9157	9158	9099	9099	1	1791	1791	15	15	6	162.375	495	Schisto_mansoni.Chr_3	11237086	11240797	147.177	2	2	1999	7296	7296	7226	7226	1	1433	1433	12	12	6	147.177	395	Schisto_mansoni.Chr_3	11237086	11240797	168.558	2	2	1999	8064	8064	7989	7989
Smp_072470	-1.15522	0.179445	bHLH transcription factor	1.85709	1	1	1287	73	73	67	67	1	0	0	5	5	2	1.85709	4	Schisto_mansoni.Chr_1	55969037	55972354	1.45524	1	1	1287	48	48	46	46	1	0	0	6	6	2	1.45524	4	Schisto_mansoni.Chr_1	55969037	55972354	1.50747	1	1	1287	53	53	46	46
Smp_079860	-1.1551	0.00361695	o-acyltransferase (membrane bound) domain containing protein, putative	85.2105	2	2	2259	5741	5751	5396	5396	1	2567	2567	45	45	15	85.2105	246	Schisto_mansoni.SC_0232	85508	107937	86.765	2	2	2259	5129	5141	4814	4814	1	2193	2193	46	46	15	86.765	219	Schisto_mansoni.SC_0232	85508	107937	83.4567	2	2	2259	4716	4726	4470	4470
Smp_093620	-1.15502	0.0749377	hypothetical protein	29.1963	1	1	1377	1035	1127	1035	1127	0.918367	0	0	0	0	1	29.1963	8	Schisto_mansoni.Chr_3.unplaced.SC_0083	136669	138045	29.0061	1	1	1377	902	981	902	981	0.91947	0	0	0	0	1	29.0061	7	Schisto_mansoni.Chr_3.unplaced.SC_0083	136669	138045	31.5175	1	1	1377	941	1029	941	1029
Smp_139970	-1.1549	0.0343829	Calmodulin-3 (CaM-3), putative	450.369	1	1	376	5037	5037	4747	4747	1	822	822	32	32	2	450.369	1154.5	Schisto_mansoni.Chr_W	15283962	15285315	491.288	1	1	376	4813	4813	4537	4537	1	899	899	41	41	2	491.288	1111	Schisto_mansoni.Chr_W	15283962	15285315	450.704	1	1	376	4265	4265	4018	4018
Smp_150820	-1.15486	0.00183617	acyl-CoA thioesterase-related	34.9087	1	1	1634	2028	2052	1599	1599	1	707	707	35	35	10	34.9087	70.5	Schisto_mansoni.Chr_4	14467701	14498078	36.8279	1	1	1634	1868	1904	1478	1478	1	658	658	26	26	10	36.8279	84.5	Schisto_mansoni.Chr_4	14467701	14498078	36.2139	1	1	1634	1723	1744	1403	1403
Smp_185230	-1.1545	0.0698748	arginine/serine-rich splicing factor, putative	172.99	1	1	624	3026	3026	3026	3026	1	903	903	619	619	4	172.99	479	Schisto_mansoni.Chr_2.unplaced.SC_0108	1029631	1030375	183.022	1	1	624	2805	2805	2805	2805	1	852	852	573	573	4	183.022	435	Schisto_mansoni.Chr_2.unplaced.SC_0108	1029631	1030375	204.731	1	1	624	3029	3029	3029	3029
Smp_154670	-1.15427	0.0278125	glycosyltransferase 14 family member, putative	62.5856	1	1	1071	2137	2138	1879	1879	1	166	166	145	145	3	62.5856	178	Schisto_mansoni.Chr_1	35677530	35681499	64.589	1	1	1071	1948	1950	1699	1699	1	170	170	166	166	3	64.589	156	Schisto_mansoni.Chr_1	35677530	35681499	59.0312	1	1	1071	1725	1725	1499	1499
Smp_173920	-1.15416	0.147359		51.3611	1	1	1096	503	1578	503	1578	0.318758	0	0	0	0	1	51.3611	113	Schisto_mansoni.Chr_W	27247008	27248103	60.8125	1	1	1096	487	1637	487	1637	0.297495	0	0	0	0	1	60.8125	121.5	Schisto_mansoni.Chr_W	27247008	27248103	62.6489	1	1	1096	474	1628	474	1628
Smp_133400	-1.1538	0.648043	hypothetical protein	0.0956376	2	1	1492	12	12	4	4	1	1	1	0	0	14	0.0956376	0	Schisto_mansoni.SC_0080	917651	926575	0.0545778	2	0	1492	6	6	2	2	1	0	0	2	2	14	0.0545778	0	Schisto_mansoni.SC_0080	917651	926575	0.141342	2	0	1492	12	12	5	5
Smp_130370	-1.15377	0.180554	elongation of fatty acids protein 1	5.60051	1	1	879	331	342	138	138	1	16	16	19	19	3	5.60051	17	Schisto_mansoni.Chr_3	27247964	27275877	4.77093	1	1	879	261	269	103	103	1	13	13	16	16	3	4.77093	12	Schisto_mansoni.Chr_3	27247964	27275877	5.56594	1	1	879	269	282	116	116
Smp_142350	-1.15349	0.0442611	hypothetical protein	24.7486	1	1	369	257	257	256	256	1	108	108	0	0	2	24.7486	81	Schisto_mansoni.Chr_W	47473441	47475141	23.7229	1	1	369	215	215	215	215	1	96	96	0	0	2	23.7229	65	Schisto_mansoni.Chr_W	47473441	47475141	23.6599	1	1	369	207	207	207	207
Smp_133360	-1.15331	0.190629	hypothetical protein	21.5416	1	1	207	128	128	125	125	1	2	2	14	14	2	21.5416	58	Schisto_mansoni.SC_0080	570883	571900	21.2426	1	1	207	108	108	108	108	1	0	0	10	10	2	21.2426	53	Schisto_mansoni.SC_0080	570883	571900	22.4126	1	1	207	110	110	110	110
Smp_108390	-1.15324	0.169735	histone H2B, putative	52.9671	1	1	658	977	977	977	977	1	0	0	0	0	1	52.9671	150	Schisto_mansoni.SC_0248	118278	118935	64.7233	1	1	658	1046	1046	1046	1046	1	0	0	0	0	1	64.7233	166	Schisto_mansoni.SC_0248	118278	118935	56.5984	1	1	658	883	883	883	883
Smp_014060	-1.15297	0.202332	hypothetical protein	20.1231	1	1	312	176	176	176	176	1	0	0	0	0	1	20.1231	66	Schisto_mansoni.Chr_W	49159705	49160016	25.7079	1	1	312	197	197	197	197	1	0	0	0	0	1	25.7079	70.5	Schisto_mansoni.Chr_W	49159705	49160016	22.5752	1	1	312	167	167	167	167
Smp_151120	-1.15285	0.0361527	twik family of potassium channels-related	20.7509	1	1	1530	1148	1153	890	890	1	149	149	21	21	4	20.7509	60	Schisto_mansoni.SC_0113	885961	898626	19.5592	1	1	1530	946	954	735	735	1	149	149	19	19	4	19.5592	49	Schisto_mansoni.SC_0113	885961	898626	20.0958	1	1	1530	932	944	729	729
Smp_006000	-1.15247	0.0010668	eukaryotictranslation initiation factor 3 subunit, putative	69.6112	1	1	761	1540	1964	1485	1485	1	730	730	14	14	6	69.6112	224	Schisto_mansoni.Chr_1	37979244	37986260	72.9768	1	1	761	1404	1793	1364	1364	1	650	650	23	23	6	72.9768	198	Schisto_mansoni.Chr_1	37979244	37986260	72.8804	1	1	761	1349	1734	1315	1315
Smp_045730	-1.15247	0.000861939	Exosome complex exonuclease RRP43, putative	44.6246	1	1	1327	1729	1729	1660	1660	1	245	245	8	8	3	44.6246	135	Schisto_mansoni.Chr_W.unplaced.SC_0272	92303	96318	45.9924	1	1	1327	1571	1571	1499	1499	1	233	233	10	10	3	45.9924	122	Schisto_mansoni.Chr_W.unplaced.SC_0272	92303	96318	46.6261	1	1	1327	1520	1521	1467	1467
Smp_110280	-1.15211	0.0238215	hypothetical protein	70.9046	1	1	2022	4019	4019	4019	4019	1	0	0	0	0	1	70.9046	212	Schisto_mansoni.Chr_1	30143162	30145183	67.4557	1	1	2022	3350	3350	3350	3350	1	0	0	0	0	1	67.4557	199	Schisto_mansoni.Chr_1	30143162	30145183	69.4805	1	1	2022	3331	3331	3331	3331
Smp_059480	-1.15193	0.0267217	Peroxiredoxin, Prx1	758.426	1	1	706	15159	15159	15010	15010	1	5387	5387	1308	1308	4	758.426	2565	Schisto_mansoni.Chr_5	5961229	5963671	725.835	1	1	706	12687	12687	12586	12586	1	4549	4549	1084	1084	4	725.835	2172	Schisto_mansoni.Chr_5	5961229	5963671	824.651	1	1	706	13884	13884	13804	13804
Smp_041740	-1.1516	0.00180396	chaperonin containing t-complex protein 1, gamma subunit, tcpg, putative	213.388	1	1	1703	10187	10187	10187	10187	1	4935	4935	25	25	10	213.388	614	Schisto_mansoni.Chr_4	21400735	21402736	211.321	1	1	1703	8839	8839	8839	8839	1	4289	4289	24	24	10	211.321	527	Schisto_mansoni.Chr_4	21400735	21402736	223.24	1	1	1703	9014	9014	9014	9014
Smp_159330	-1.15152	0.158611	hypothetical protein	1.14478	1	1	966	55	58	31	31	1	8	8	6	6	6	1.14478	3	Schisto_mansoni.Chr_2	34422189	34437243	1.39089	1	1	966	50	51	33	33	1	13	13	1	1	6	1.39089	3	Schisto_mansoni.Chr_2	34422189	34437243	1.30983	1	1	966	50	50	30	30
Smp_075420	-1.15147	0.00862486		169.927	1	1	1408	6707	6707	6707	6707	1	0	0	0	0	1	169.927	571	Schisto_mansoni.Chr_W.unplaced.SC_0185	172014	173421	156.845	1	1	1408	5424	5424	5424	5424	1	0	0	0	0	1	156.845	452	Schisto_mansoni.Chr_W.unplaced.SC_0185	172014	173421	159.569	1	1	1408	5327	5327	5327	5327
Smp_001980	-1.15139	0.489365	homeobox protein, putative	3.7667	1	1	483	158	171	51	51	1	11	11	8	8	3	3.7667	11	Schisto_mansoni.Chr_6	2360845	2373016	4.04622	1	1	483	145	153	48	48	1	11	11	10	10	3	4.04622	10	Schisto_mansoni.Chr_6	2360845	2373016	2.88162	1	1	483	99	107	33	33
Smp_205790	-1.15108	0.410299		4.4591	1	1	216	23	27	23	27	0.851852	0	0	0	0	1	4.4591	11	Schisto_mansoni.SC_0660	8048	8263	3.39292	1	1	216	14	18	14	18	0.777778	0	0	0	0	1	3.39292	6	Schisto_mansoni.SC_0660	8048	8263	3.31944	1	1	216	16	17	16	17
Smp_160580	-1.15106	0.0330846	twinfilin, putative	171.578	1	1	757	4296	4359	3641	3641	1	1706	1706	933	933	7	171.578	546	Schisto_mansoni.Chr_3	10292904	10308721	163.344	1	1	757	3612	3663	3037	3037	1	1420	1420	778	778	7	163.344	452	Schisto_mansoni.Chr_3	10292904	10308721	180.684	1	1	757	3706	3762	3243	3243
Smp_096910	-1.15101	0.0329215	dolichyl glycosyltransferase	21.5472	1	1	1591	961	961	961	961	1	0	0	0	0	1	21.5472	62	Schisto_mansoni.Chr_2	9861904	9863494	22.0593	1	1	1591	862	862	862	862	1	0	0	0	0	1	22.0593	57	Schisto_mansoni.Chr_2	9861904	9863494	22.4004	1	1	1591	845	845	845	845
Smp_088260	-1.15065	0.0121202	cell wall protein Awa1p, putative	31.6316	1	1	2913	2618	2618	2583	2583	1	56	56	2	2	3	31.6316	88	Schisto_mansoni.Chr_W	48243309	48254846	28.7088	1	1	2913	2108	2108	2054	2054	1	45	45	2	2	3	28.7088	69	Schisto_mansoni.Chr_W	48243309	48254846	29.2904	1	1	2913	2051	2051	2023	2023
Smp_210390	-1.15053	0.0120964	nucleotide binding protein 2 (nbp 2), putative	33.8331	1	1	795	847	847	754	754	1	1	1	278	278	2	33.8331	75	Schisto_mansoni.Chr_1	53031764	53032819	32.9305	1	1	795	731	731	643	643	1	0	0	207	207	2	32.9305	68	Schisto_mansoni.Chr_1	53031764	53032819	35.8632	1	1	795	766	766	676	676
Smp_170580	-1.15049	0.284479	hypothetical protein	5.09612	1	1	504	107	107	72	72	1	0	0	9	9	3	5.09612	17	Schisto_mansoni.Chr_1	58586522	58588471	5.0086	1	1	504	98	98	62	62	1	0	0	4	4	3	5.0086	13	Schisto_mansoni.Chr_1	58586522	58588471	6.27625	1	1	504	103	103	75	75
Smp_173110	-1.15031	0.253932		40.4292	1	1	690	783	783	782	782	1	51	51	375	375	4	40.4292	116	Schisto_mansoni.SC_0013	2765429	2767161	32.9261	1	1	690	559	559	558	558	1	39	39	268	268	4	32.9261	82	Schisto_mansoni.SC_0013	2765429	2767161	29.6457	1	1	690	485	485	485	485
Smp_035090	-1.1497	0.0130358	hepatoma up-regulated protein, putative	20.585	3	1	3329	2353	2356	1921	1921	1	627	627	41	41	18	20.585	58	Schisto_mansoni.Chr_1	14808153	14826842	19.4586	3	1	3329	1983	1989	1591	1591	1	479	479	33	33	18	19.4586	45	Schisto_mansoni.Chr_1	14808153	14826842	20.5498	3	1	3329	1924	1925	1622	1622
Smp_031720	-1.14954	0.00181341	histone H2A, putative	190.397	1	1	919	4977	4977	4905	4905	1	816	816	8	8	2	190.397	628	Schisto_mansoni.Chr_7	9159710	9162596	182.93	1	1	919	4192	4192	4129	4129	1	740	740	12	12	2	182.93	506	Schisto_mansoni.Chr_7	9159710	9162596	192.938	1	1	919	4263	4263	4204	4204
Smp_173250	-1.14948	0.755688		0.726669	1	1	540	9	11	9	11	0.818182	9	9	0	0	2	0.726669	1	Schisto_mansoni.SC_0299	66230	67809	0.301593	1	1	540	4	4	4	4	1	4	4	0	0	2	0.301593	0	Schisto_mansoni.SC_0299	66230	67809	0.546731	1	1	540	4	7	4	7
Smp_000210	-1.14945	0.517407		19.2984	1	0	183	1613	1769	99	99	1	0	0	99	99	3	19.2984	3	Schisto_mansoni.Chr_3.unplaced.SC_0044	564649	572728	15.1291	1	0	183	1365	1469	68	68	1	0	0	68	68	3	15.1291	6	Schisto_mansoni.Chr_3.unplaced.SC_0044	564649	572728	10.1408	1	0	183	1178	1315	44	44
Smp_176530	-1.14945	0.00260864	hypothetical protein	13.1581	1	1	5349	2288	2308	1973	1973	1	746	746	37	37	26	13.1581	39	Schisto_mansoni.Chr_W	44140442	44203848	12.9475	1	1	5349	1983	2004	1701	1701	1	631	631	36	36	26	12.9475	32	Schisto_mansoni.Chr_W	44140442	44203848	13.5542	1	1	5349	1930	1946	1719	1719
Smp_101990	-1.14943	0.314772	nAChR subunit, putative	1.54053	1	1	741	32	32	32	32	1	0	0	0	0	1	1.54053	4	Schisto_mansoni.Chr_2	5272445	5273185	1.26376	1	1	741	23	23	23	23	1	0	0	0	0	1	1.26376	3	Schisto_mansoni.Chr_2	5272445	5273185	1.36604	1	1	741	24	24	24	24
Smp_007540	-1.14931	0.000395086	3'-5' exoribonuclease csl4-related	25.1185	1	1	774	565	565	545	545	1	154	154	0	0	3	25.1185	79	Schisto_mansoni.SC_0170	270903	272804	25.3548	1	1	774	495	495	482	482	1	137	137	2	2	3	25.3548	69	Schisto_mansoni.SC_0170	270903	272804	25.3385	1	1	774	477	477	465	465
Smp_016540	-1.1491	0.468095	hypothetical protein	0.502434	1	1	852	25	25	12	12	1	1	1	2	2	2	0.502434	0	Schisto_mansoni.Chr_4	28432087	28436182	0.764602	1	1	852	24	24	16	16	1	0	0	6	6	2	0.764602	0	Schisto_mansoni.Chr_4	28432087	28436182	0.643537	1	1	852	23	23	13	13
Smp_036950	-1.14906	0.0138465	hypothetical protein	71.2922	1	1	2002	4001	4001	4001	4001	1	0	0	0	0	1	71.2922	210	Schisto_mansoni.SC_0222	323126	325127	71.9733	1	1	2002	3539	3539	3539	3539	1	0	0	0	0	1	71.9733	180	Schisto_mansoni.SC_0222	323126	325127	70.0061	1	1	2002	3323	3323	3323	3323
Smp_176760	-1.14882	0.109804	metaxin, putative	14.155	1	1	1313	662	667	521	521	1	180	180	6	6	6	14.155	42	Schisto_mansoni.Chr_1.unplaced.SC_0076	1244841	1256705	16.0007	1	1	1313	656	662	516	516	1	181	181	9	9	6	16.0007	41	Schisto_mansoni.Chr_1.unplaced.SC_0076	1244841	1256705	16.575	1	1	1313	629	638	516	516
Smp_163520	-1.14828	0.0351979	hypothetical protein	83.0438	1	1	1110	2584	2584	2584	2584	1	0	0	0	0	1	83.0438	277	Schisto_mansoni.SC_0013	2845687	2846796	78.7891	1	1	1110	2148	2148	2148	2148	1	0	0	0	0	1	78.7891	225	Schisto_mansoni.SC_0013	2845687	2846796	83.0609	1	1	1110	2186	2186	2186	2186
Smp_084570	-1.14823	0.0828442	steroid dehydrogenase, putative	8.29093	1	1	981	227	230	225	228	0.986842	0	0	0	0	3	8.29093	0	Schisto_mansoni.Chr_3.unplaced.SC_0083	567401	569844	8.63275	1	1	981	209	211	206	208	0.990385	1	1	0	0	3	8.63275	0	Schisto_mansoni.Chr_3.unplaced.SC_0083	567401	569844	7.17988	1	1	981	169	169	167	167
Smp_179010	-1.14784	0.0873418	exosome complex exonuclease rrp42 (ribosomal rna processing protein 42), putative	22.8016	1	1	934	614	614	597	597	1	467	467	40	40	8	22.8016	71	Schisto_mansoni.Chr_2	29300183	29302391	26.2861	1	1	934	624	624	603	603	1	502	502	35	35	8	26.2861	70	Schisto_mansoni.Chr_2	29300183	29302391	27.6811	1	1	934	633	633	613	613
Smp_128840	-1.1478	0.032966	DNA-directed rna polymerase II 19 kD polypeptide rpb7, putative	28.9041	1	1	585	657	657	474	474	1	287	287	17	17	6	28.9041	102	Schisto_mansoni.Chr_2	15347742	15354752	27.0042	1	1	585	554	554	388	388	1	249	249	11	11	6	27.0042	83	Schisto_mansoni.Chr_2	15347742	15354752	30.7852	1	1	585	619	619	427	427
Smp_131380	-1.14776	0.0972753		14.9141	1	1	531	856	914	222	222	1	109	109	15	15	5	14.9141	49	Schisto_mansoni.Chr_6	17483366	17498866	16.1787	1	1	531	757	803	211	211	1	91	91	19	19	5	16.1787	47	Schisto_mansoni.Chr_6	17483366	17498866	17.7919	1	1	531	774	828	224	224
Smp_178330	-1.14772	0.681578		1.41278	1	1	303	12	12	12	12	1	0	0	0	0	1	1.41278	4	Schisto_mansoni.SC_0270	16425	16727	1.61248	1	1	303	12	12	12	12	1	0	0	0	0	1	1.61248	4	Schisto_mansoni.SC_0270	16425	16727	1.53116	1	1	303	11	11	11	11
Smp_170380	-1.14766	0.0445895		22.6816	1	1	1513	998	1002	962	962	1	407	407	6	6	9	22.6816	61	Schisto_mansoni.Chr_2	1268602	1280184	22.7391	1	1	1513	883	889	845	845	1	423	423	7	7	9	22.7391	57	Schisto_mansoni.Chr_2	1268602	1280184	22.6353	1	1	1513	829	834	812	812
Smp_055800	-1.14721	0.0182871	pescadillo - related	54.0804	1	1	1905	3250	3250	2888	2888	1	1408	1408	64	64	11	54.0804	151	Schisto_mansoni.Chr_W	47225864	47233939	56.9156	1	1	1905	2970	2970	2663	2663	1	1262	1262	67	67	11	56.9156	137	Schisto_mansoni.Chr_W	47225864	47233939	59.5341	1	1	1905	2986	2987	2689	2689
Smp_154000	-1.14718	0.0795418	hypothetical protein	155.022	1	1	784	4810	4894	3407	3407	1	1656	1656	89	89	6	155.022	493	Schisto_mansoni.SC_0129	798121	816045	158.55	1	1	784	4306	4377	3053	3053	1	1465	1465	108	108	6	158.55	436	Schisto_mansoni.SC_0129	798121	816045	182.747	1	1	784	4565	4628	3397	3397
Smp_124840	-1.14669	0.00146902	hypothetical protein	48.0901	1	1	1333	1937	1947	1797	1797	1	821	821	68	68	8	48.0901	145	Schisto_mansoni.Chr_1	32587519	32593674	49.2063	1	1	1333	1760	1767	1611	1611	1	764	764	57	57	8	49.2063	127	Schisto_mansoni.Chr_1	32587519	32593674	50.213	1	1	1333	1717	1727	1587	1587
Smp_127500	-1.14665	0.0212171	hypothetical protein	14.6913	1	1	828	600	603	341	341	1	151	151	21	21	8	14.6913	45	Schisto_mansoni.Chr_3	12432363	12452107	15.7353	1	1	828	578	581	320	320	1	146	146	20	20	8	15.7353	42	Schisto_mansoni.Chr_3	12432363	12452107	15.0266	1	1	828	527	527	295	295
Smp_200650	-1.14663	0.542987		1.41559	1	1	252	10	10	10	10	1	0	0	0	0	1	1.41559	4	Schisto_mansoni.Chr_1	61652473	61652724	2.26195	1	1	252	14	14	14	14	1	0	0	0	0	1	2.26195	5	Schisto_mansoni.Chr_1	61652473	61652724	1.5063	1	1	252	9	9	9	9
Smp_198180	-1.14651	0.108055	DNA (cytosine-5)-methyltransferase, putative	7.43801	1	1	964	264	265	201	201	1	137	137	7	7	8	7.43801	21	Schisto_mansoni.Chr_4	12455140	12461881	7.7291	1	1	964	241	241	183	183	1	131	131	6	6	8	7.7291	20	Schisto_mansoni.Chr_4	12455140	12461881	8.18153	1	1	964	249	249	187	187
Smp_126010	-1.14647	0.138648	neuropeptide receptor, putative	2.89707	1	1	825	131	152	67	67	1	0	0	2	2	2	2.89707	9	Schisto_mansoni.Chr_1	30544853	30577587	3.55331	1	1	825	122	138	72	72	1	0	0	4	4	2	3.55331	11	Schisto_mansoni.Chr_1	30544853	30577587	3.27187	1	1	825	107	130	64	64
Smp_150830	-1.14637	0.240958	hypothetical protein	0.845578	1	1	2025	160	163	48	48	1	25	25	5	5	14	0.845578	2	Schisto_mansoni.Chr_4	14372692	14416628	0.824354	1	1	2025	159	163	41	41	1	20	20	6	6	14	0.824354	1	Schisto_mansoni.Chr_4	14372692	14416628	0.978909	1	1	2025	159	161	47	47
Smp_137800	-1.14633	0.0063236	hypothetical protein	3.5189	1	1	2433	276	276	240	240	1	69	69	19	19	11	3.5189	9	Schisto_mansoni.Chr_3	4830355	4848205	3.63139	1	1	2433	243	243	217	217	1	69	69	18	18	11	3.63139	8	Schisto_mansoni.Chr_3	4830355	4848205	3.55371	1	1	2433	245	246	205	205
Smp_133430	-1.14585	0.52127		4.47486	1	1	566	170	171	71	71	1	48	48	23	23	8	4.47486	12	Schisto_mansoni.SC_0080	1299796	1308158	6.11445	1	1	566	175	175	85	85	1	74	74	11	11	8	6.11445	15	Schisto_mansoni.SC_0080	1299796	1308158	3.35325	1	1	566	130	130	45	45
Smp_161980	-1.14573	0.00318159	ribonuclease II-related	18.8052	1	1	3995	2436	2448	2106	2106	1	651	651	161	161	17	18.8052	51	Schisto_mansoni.Chr_1	10277961	10304675	18.4466	1	1	3995	2103	2117	1810	1810	1	550	550	152	152	17	18.4466	42	Schisto_mansoni.Chr_1	10277961	10304675	18.697	1	1	3995	2018	2030	1771	1771
Smp_128290	-1.14568	0.334849	hypothetical protein	2.84222	1	1	615	67	68	49	49	1	7	7	1	1	3	2.84222	9	Schisto_mansoni.Chr_2	26442418	26454023	2.64813	1	1	615	53	54	40	40	1	10	10	0	0	3	2.64813	6	Schisto_mansoni.Chr_2	26442418	26454023	3.15466	1	1	615	52	52	46	46
Smp_051080	-1.14568	0.00365773	clathrin light chain, putative	134.421	1	1	1376	5303	5316	5185	5185	1	1817	1817	18	18	4	134.421	367.5	Schisto_mansoni.Chr_6	14423352	14434471	128.507	1	1	1376	4436	4448	4343	4343	1	1530	1530	7	7	4	128.507	333	Schisto_mansoni.Chr_6	14423352	14434471	126.713	1	1	1376	4225	4236	4134	4134
Smp_146490	-1.14565	0.00442805	hypothetical protein	26.4099	1	1	1190	1083	1083	881	881	1	246	246	35	35	5	26.4099	72	Schisto_mansoni.Chr_W	13695909	13704044	27.4399	1	1	1190	962	962	802	802	1	233	233	22	22	5	27.4399	69	Schisto_mansoni.Chr_W	13695909	13704044	26.9716	1	1	1190	906	906	761	761
Smp_078060	-1.14556	0.0153612	hypothetical protein	16.5741	1	1	975	952	952	453	453	1	0	0	79	79	2	16.5741	41	Schisto_mansoni.SC_0111	353408	355349	17.1212	1	1	975	858	858	410	410	1	0	0	60	60	2	17.1212	41	Schisto_mansoni.SC_0111	353408	355349	17.6492	1	1	975	811	811	408	408
Smp_167880	-1.14524	0.000451565	putative nuclear protein	20.4362	1	1	1674	1061	1061	959	959	1	283	283	18	18	6	20.4362	62	Schisto_mansoni.Chr_3	12125434	12134493	20.5521	1	1	1674	933	933	845	845	1	209	209	29	29	6	20.5521	53	Schisto_mansoni.Chr_3	12125434	12134493	20.5339	1	1	1674	879	879	815	815
Smp_127710	-1.14514	0.0019438	hypothetical protein	53.6632	1	1	1969	3023	3026	2962	2962	1	798	798	2	2	6	53.6632	159	Schisto_mansoni.Chr_7	1148099	1171177	52.4808	1	1	1969	2596	2600	2538	2538	1	674	674	2	2	6	52.4808	140	Schisto_mansoni.Chr_7	1148099	1171177	50.8516	1	1	1969	2419	2421	2374	2374
Smp_148720	-1.14495	0.149176	t3/t7 bacteriophage-related mitochodrial DNA- directed rna polymerase	4.97789	1	1	2931	540	548	409	409	1	219	219	7	7	18	4.97789	12	Schisto_mansoni.Chr_1	50186194	50221354	4.723	1	1	2931	467	476	340	340	1	173	173	9	9	18	4.723	11	Schisto_mansoni.Chr_1	50186194	50221354	5.12276	1	1	2931	470	478	356	356
Smp_050470	-1.14486	0.0354906	hypothetical protein	7.94351	1	1	3422	968	995	762	762	1	406	406	17	17	20	7.94351	23	Schisto_mansoni.Chr_4	25307789	25337797	7.97168	1	1	3422	864	884	670	670	1	350	350	15	15	20	7.97168	18	Schisto_mansoni.Chr_4	25307789	25337797	8.91103	1	1	3422	901	917	723	723
Smp_166110	-1.14462	0.00655723	ebna2 binding protein P100, putative	29.1323	1	1	1309	630	1069	630	1069	0.589336	251	253	5	5	4	29.1323	88	Schisto_mansoni.Chr_3.unplaced.SC_0220	28561	30059	27.3093	1	1	1309	511	878	511	878	0.582005	227	232	5	5	4	27.3093	74	Schisto_mansoni.Chr_3.unplaced.SC_0220	28561	30059	28.1928	1	1	1309	523	875	523	875
Smp_144840	-1.14462	0.00288544	thioredoxin-like protein, putative	72.4817	1	1	2355	4967	5116	4750	4785	0.992685	1987	1987	8	10	11	72.4817	225	Schisto_mansoni.Chr_7	6449446	6490722	70.7283	1	1	2355	4258	4397	4066	4091	0.993889	1618	1618	4	5	11	70.7283	192	Schisto_mansoni.Chr_7	6449446	6490722	71.3507	1	1	2355	4127	4234	3963	3984
Smp_136380	-1.14459	0.000696525	hypothetical protein	9.0362	2	2	5744	1788	1817	1455	1455	1	296	296	48	48	20	9.0362	23	Schisto_mansoni.Chr_3	13311826	13397990	8.79655	2	2	5744	1519	1547	1241	1241	1	260	260	44	44	20	8.79655	18	Schisto_mansoni.Chr_3	13311826	13397990	9.02417	2	2	5744	1444	1460	1229	1229
Smp_121600	-1.14451	0.227147	hypothetical protein	28.0504	1	1	234	270	270	184	184	1	0	0	19	19	2	28.0504	69	Schisto_mansoni.Chr_2	5716895	5717555	27.8393	1	1	234	225	225	160	160	1	0	0	25	25	2	27.8393	59	Schisto_mansoni.Chr_2	5716895	5717555	34.7865	1	1	234	260	260	193	193
Smp_136520	-1.14413	0.0904057	btf, putative	21.4718	1	1	1467	1229	1685	883	883	1	505	505	17	17	11	21.4718	65	Schisto_mansoni.Chr_W	54497807	54529378	19.4833	1	1	1467	940	1268	702	702	1	407	407	17	17	11	19.4833	51	Schisto_mansoni.Chr_W	54497807	54529378	22.1088	1	1	1467	1002	1424	769	769
Smp_167710	-1.14413	0.217297		9.23146	1	1	1395	204	361	204	361	0.565097	0	0	0	0	1	9.23146	14	Schisto_mansoni.Chr_3.unplaced.SC_0044	2147456	2148850	11.9372	1	1	1395	211	409	211	409	0.515892	0	0	0	0	1	11.9372	18	Schisto_mansoni.Chr_3.unplaced.SC_0044	2147456	2148850	11.9727	1	1	1395	204	396	204	396
Smp_085780	-1.14392	0.030106	hypothetical protein	23.7182	1	1	934	655	655	621	621	1	264	264	3	3	5	23.7182	72	Schisto_mansoni.Chr_3	14523542	14534882	21.3601	1	1	934	526	527	490	490	1	202	202	4	4	5	21.3601	56	Schisto_mansoni.Chr_3	14523542	14534882	23.2106	1	1	934	546	546	514	514
Smp_097500	-1.14391	0.0144059	hypothetical protein	20.4777	1	1	1803	1035	1035	1035	1035	1	0	0	0	0	1	20.4777	65	Schisto_mansoni.Chr_1.unplaced.SC_0010	825867	827669	20.1656	1	1	1803	893	893	893	893	1	0	0	0	0	1	20.1656	55	Schisto_mansoni.Chr_1.unplaced.SC_0010	825867	827669	18.6203	1	1	1803	796	796	796	796
Smp_137280	-1.14321	0.56219		0.696384	1	1	1588	114	116	31	31	1	17	17	3	3	13	0.696384	1	Schisto_mansoni.SC_0241	120033	148057	0.717898	1	1	1588	105	112	28	28	1	15	15	2	2	13	0.717898	2	Schisto_mansoni.SC_0241	120033	148057	0.584308	1	1	1588	97	99	22	22
Smp_160430	-1.14298	0.100331	hypothetical protein	27.1655	1	1	369	343	343	281	281	1	92	92	5	5	2	27.1655	93	Schisto_mansoni.Chr_1	573684	576338	31.4466	1	1	369	338	339	285	285	1	94	94	5	5	2	31.4466	93	Schisto_mansoni.Chr_1	573684	576338	30.9751	1	1	369	308	309	271	271
Smp_133350	-1.14297	6.50071e-05	nucleolar GTP-binding protein, putative	37.6006	1	1	2017	2241	2249	2126	2126	1	727	727	42	42	9	37.6006	108	Schisto_mansoni.SC_0080	527164	538582	37.5862	1	1	2017	1972	1974	1862	1862	1	663	663	38	38	9	37.5862	92	Schisto_mansoni.SC_0080	527164	538582	38.4125	1	1	2017	1931	1938	1837	1837
Smp_158620	-1.14268	0.110404	retinaldehyde binding protein-related	38.862	1	1	1387	5513	5527	1511	1511	1	453	453	8	8	5	38.862	112	Schisto_mansoni.SC_0142	307822	353930	35.4312	1	1	1387	4576	4587	1207	1207	1	321	321	10	10	5	35.4312	95	Schisto_mansoni.SC_0142	307822	353930	32.841	1	1	1387	4440	4449	1080	1080
Smp_127650	-1.14222	0.0177087	secretory carrier membrane protein, putative	394.559	1	1	777	9244	9297	8594	8594	1	5257	5257	23	23	5	394.559	1140	Schisto_mansoni.Chr_7	932661	957754	356.584	1	1	777	7309	7361	6805	6805	1	4161	4161	13	13	5	356.584	912	Schisto_mansoni.Chr_7	932661	957754	370.089	1	1	777	7258	7312	6818	6818
Smp_044020	-1.142	0.0154806	folate carrier protein, putative	19.4648	1	1	942	626	638	514	514	1	275	275	11	11	6	19.4648	56	Schisto_mansoni.Chr_2	25313116	25321549	21.0059	1	1	942	603	617	486	486	1	241	241	13	13	6	21.0059	52	Schisto_mansoni.Chr_2	25313116	25321549	21.1778	1	1	942	568	574	473	473
Smp_158680	-1.14185	0.336162	molybdopterin biosynthesis protein, putative	5.93174	1	1	1299	468	468	216	216	1	1	1	25	25	3	5.93174	16	Schisto_mansoni.SC_0142	177148	184677	7.99256	1	1	1299	482	482	255	255	1	0	0	47	47	3	7.99256	18	Schisto_mansoni.SC_0142	177148	184677	6.72095	1	1	1299	389	390	207	207
Smp_137160	-1.14179	0.0389622	mitochondrial solute carrier, putative	12.1118	1	1	2100	931	960	713	713	1	351	351	47	47	14	12.1118	34	Schisto_mansoni.Chr_4	6880523	6914999	12.4084	1	1	2100	804	833	640	640	1	315	315	34	34	14	12.4084	31	Schisto_mansoni.Chr_4	6880523	6914999	13.5969	1	1	2100	823	838	677	677
Smp_202400	-1.14137	0.2362		5.51642	1	1	873	75	135	75	135	0.555556	0	0	0	0	1	5.51642	13	Schisto_mansoni.Chr_3.unplaced.SC_0174	490375	491247	5.36338	1	1	873	66	115	66	115	0.573913	0	0	0	0	1	5.36338	8	Schisto_mansoni.Chr_3.unplaced.SC_0174	490375	491247	4.63796	1	1	873	53	96	53	96
Smp_089650	-1.14127	0.0482567	hypothetical protein	18.7908	1	1	1084	785	816	571	571	1	101	101	13	13	3	18.7908	58	Schisto_mansoni.Chr_1	2453702	2461740	18.6673	1	1	1084	689	748	497	497	1	74	74	9	9	3	18.6673	46	Schisto_mansoni.Chr_1	2453702	2461740	19.7264	1	1	1084	658	688	507	507
Smp_075280	-1.14114	0.00481911	hypothetical protein	118.054	3	2	1891	7096	7551	6258	6258	1	2387	2387	74	74	8	118.054	118	Schisto_mansoni.Chr_W	50194883	50203888	114.2	3	2	1891	5992	6385	5304	5304	1	2083	2083	58	58	8	114.2	98	Schisto_mansoni.Chr_W	50194883	50203888	110.024	3	2	1891	5517	5880	4933	4933
Smp_169040	-1.14079	0.021538	hypothetical protein	29.7199	1	1	1606	1933	2574	1338	1338	1	532	532	26	26	8	29.7199	94	Schisto_mansoni.Chr_2	17390797	17411987	27.38	1	1	1606	1561	2231	1080	1080	1	456	456	16	16	8	27.38	71	Schisto_mansoni.Chr_2	17390797	17411987	27.1022	1	1	1606	1431	1984	1032	1032
Smp_143590	-1.14059	0.233599	hypothetical protein	3.67643	1	1	1863	388	390	192	192	1	0	0	81	81	4	3.67643	3	Schisto_mansoni.Chr_2	28759417	28779332	3.67157	1	1	1863	325	325	168	168	1	0	0	66	66	4	3.67157	3	Schisto_mansoni.Chr_2	28759417	28779332	3.0789	1	1	1863	294	296	136	136
Smp_076880	-1.14057	0.127312	hypothetical protein	57.9344	1	1	657	1322	1322	1067	1067	1	369	369	23	23	3	57.9344	183	Schisto_mansoni.SC_0013	3260962	3264668	60.7317	1	1	657	1191	1191	980	980	1	330	330	13	13	3	60.7317	170	Schisto_mansoni.SC_0013	3260962	3264668	67.2127	1	1	657	1258	1258	1047	1047
Smp_066050	-1.1405	0.252693	transcriptional enhancer factor (tef) related	2.45415	1	1	1221	523	1590	84	84	1	42	42	2	2	8	2.45415	6	Schisto_mansoni.Chr_W	34113227	34136305	2.66765	1	1	1221	544	1648	80	80	1	28	28	6	6	8	2.66765	6	Schisto_mansoni.Chr_W	34113227	34136305	3.07428	1	1	1221	498	1544	89	89
Smp_159380	-1.14034	0.13148	Nuclear receptor coactivator 2 (NCoA-2) (Transcriptional intermediary factor 2) (xTIF2), putative	23.9254	1	1	1160	858	858	778	778	1	218	218	5	5	4	23.9254	70	Schisto_mansoni.Chr_5.unplaced.SC_0195	401949	416648	19.6906	1	1	1160	624	624	561	561	1	171	171	3	3	4	19.6906	48	Schisto_mansoni.Chr_5.unplaced.SC_0195	401949	416648	21.1246	1	1	1160	629	629	581	581
Smp_148990	-1.1403	0.00163795	nucleolar protein NOP56, putative	40.2188	1	1	2001	2569	2571	2256	2256	1	728	728	115	115	8	40.2188	131	Schisto_mansoni.Chr_4.unplaced.SC_0032	932207	945574	41.5696	1	1	2001	2291	2293	2043	2043	1	671	671	82	82	8	41.5696	120	Schisto_mansoni.Chr_4.unplaced.SC_0032	932207	945574	40.6377	1	1	2001	2184	2185	1928	1928
Smp_024380	-1.14006	0.0350378	Arginine N-methyltransferase 2, putative	22.2171	1	1	1421	1099	1099	885	885	1	128	128	48	48	5	22.2171	69	Schisto_mansoni.Chr_W	40488998	40495974	22.836	1	1	1421	1018	1018	797	797	1	110	110	40	40	5	22.836	62	Schisto_mansoni.Chr_W	40488998	40495974	24.9022	1	1	1421	1017	1017	839	839
Smp_080150	-1.13983	0.00758664	peptidyl-prolyl cis-trans isomerase-like 3, putative (ppiase)(rotamase) (cyclophilin-like protein ppil3) (cyp10l)	42.6661	1	1	505	643	643	604	604	1	482	482	20	20	4	42.6661	138	Schisto_mansoni.Chr_4	20844962	20848086	45.9556	1	1	505	604	604	570	570	1	442	442	17	17	4	45.9556	130	Schisto_mansoni.Chr_4	20844962	20848086	45.7677	1	1	505	585	585	548	548
Smp_066820	-1.13981	0.0836261		13.1921	2	2	2769	1024	1024	1024	1024	1	294	294	38	38	12	13.1921	37	Schisto_mansoni.Chr_1	29567946	29571058	12.7483	2	2	2769	867	867	867	867	1	226	226	27	27	12	12.7483	30	Schisto_mansoni.Chr_1	29567946	29571058	14.7595	2	2	2769	969	969	969	969
Smp_202710	-1.13979	0.710886		0.540497	1	1	198	3	3	3	3	1	0	0	1	1	2	0.540497	2	Schisto_mansoni.Chr_4	19321773	19321995	1.02816	1	1	198	5	5	5	5	1	0	0	1	1	2	1.02816	3	Schisto_mansoni.Chr_4	19321773	19321995	0.639037	1	1	198	3	3	3	3
Smp_175360	-1.1393	0.0296395	cation transporting ATPase, putative	9.76136	1	1	2602	660	730	660	712	0.926966	660	673	0	0	14	9.76136	3	Schisto_mansoni.Chr_2	9882551	9909384	9.32597	1	1	2602	533	603	533	596	0.894295	533	551	0	0	14	9.32597	4	Schisto_mansoni.Chr_2	9882551	9909384	8.80161	1	1	2602	486	548	486	543
Smp_006960	-1.13906	0.251424	hypothetical protein	2.12805	1	1	1274	76	76	76	76	1	0	0	0	0	1	2.12805	6	Schisto_mansoni.Chr_3.unplaced.SC_0192	156831	158104	2.04534	1	1	1274	64	64	64	64	1	0	0	0	0	1	2.04534	5	Schisto_mansoni.Chr_3.unplaced.SC_0192	156831	158104	1.58906	1	1	1274	48	48	48	48
Smp_151280	-1.13901	0.0173714	camp-response element binding protein-related	21.0761	2	2	2483	1763	1784	1467	1467	1	440	440	13	13	12	21.0761	60	Schisto_mansoni.Chr_W	41122185	41154115	19.595	2	2	2483	1426	1444	1195	1195	1	375	375	8	8	12	19.595	47	Schisto_mansoni.Chr_W	41122185	41154115	19.9926	2	2	2483	1365	1379	1177	1177
Smp_199070	-1.13901	0.00246701		22.3128	1	1	2841	1970	1991	1777	1777	1	855	855	17	17	16	22.3128	63	Schisto_mansoni.SC_0196	219762	259186	22.9013	1	1	2841	1784	1811	1598	1598	1	759	759	22	22	16	22.9013	56	Schisto_mansoni.SC_0196	219762	259186	22.402	1	1	2841	1669	1681	1509	1509
Smp_173810	-1.13894	0.00590273	protein phosphatase pp2a regulatory subunit B, putative	13.1503	1	1	1473	848	857	543	543	1	195	195	66	66	9	13.1503	36	Schisto_mansoni.SC_0269	8725	24859	13.1847	1	1	1473	766	769	477	477	1	177	177	65	65	9	13.1847	29	Schisto_mansoni.SC_0269	8725	24859	13.5434	1	1	1473	727	731	473	473
Smp_051070	-1.13888	0.0400076		8.30878	1	1	1039	332	343	242	242	1	108	108	2	2	5	8.30878	30	Schisto_mansoni.Chr_6	14401061	14419209	8.85621	1	1	1039	310	317	226	226	1	88	88	3	3	5	8.85621	25	Schisto_mansoni.Chr_6	14401061	14419209	8.56518	1	1	1039	263	272	211	211
Smp_151020	-1.13846	0.226048	transmembrane protein 17 , putative	17.6033	1	1	612	286	302	286	302	0.94702	207	207	5	5	4	17.6033	60	Schisto_mansoni.Chr_4	31115621	31116359	17.2972	1	1	612	251	260	251	260	0.965385	162	162	5	5	4	17.2972	49	Schisto_mansoni.Chr_4	31115621	31116359	21.3639	1	1	612	296	310	296	310
Smp_140130	-1.13844	0.52315	hypothetical protein	0.312173	1	1	1257	66	73	11	11	1	7	7	3	3	12	0.312173	0	Schisto_mansoni.SC_0199	297045	349584	0.323906	1	1	1257	55	62	10	10	1	5	5	1	1	12	0.323906	0	Schisto_mansoni.SC_0199	297045	349584	0.369086	1	1	1257	67	71	11	11
Smp_138160	-1.13839	0.0238534	hypothetical protein	38.7156	1	1	891	990	990	967	967	1	0	0	140	140	2	38.7156	109	Schisto_mansoni.Chr_3.unplaced.SC_0124	325865	330284	41.172	1	1	891	916	916	901	901	1	0	0	129	129	2	41.172	104	Schisto_mansoni.Chr_3.unplaced.SC_0124	325865	330284	42.0344	1	1	891	902	902	888	888
Smp_045990	-1.13812	0.161119	diras family, GTP-binding ras- like	5.00671	1	1	228	83	83	32	32	1	0	0	16	16	2	5.00671	12.5	Schisto_mansoni.Chr_W	37187666	37198972	3.92864	1	1	228	70	70	22	22	1	0	0	9	9	2	3.92864	9	Schisto_mansoni.Chr_W	37187666	37198972	4.62461	1	1	228	59	59	25	25
Smp_044580	-1.13797	0.0205808	60S ribosomal protein L30, putative	597.121	1	1	425	7134	7134	7114	7114	1	5505	5505	406	406	4	597.121	1907	Schisto_mansoni.Chr_W	13135095	13135702	615.42	1	1	425	6446	6446	6424	6424	1	4965	4965	424	424	4	615.42	1671	Schisto_mansoni.Chr_W	13135095	13135702	662.517	1	1	425	6695	6695	6676	6676
Smp_165220	-1.13789	0.00369339	embryonic ectoderm development protein, putative	28.2786	1	1	1539	1378	1378	1220	1220	1	213	213	170	170	5	28.2786	73	Schisto_mansoni.Chr_W	24633278	24639607	29.2863	1	1	1539	1253	1253	1107	1107	1	170	170	158	158	5	29.2863	71	Schisto_mansoni.Chr_W	24633278	24639607	30.1456	1	1	1539	1227	1228	1100	1100
Smp_012580	-1.13745	0.0144065	guanine-nucleotide-exchange-factor, putative	54.8482	1	1	3237	5421	5423	4977	4977	1	1909	1909	36	36	12	54.8482	161	Schisto_mansoni.Chr_1	21585541	21617908	55.7709	1	1	3237	4810	4812	4434	4434	1	1629	1629	45	45	12	55.7709	133	Schisto_mansoni.Chr_1	21585541	21617908	52.3264	1	1	3237	4275	4277	4016	4016
Smp_045750	-1.13734	0.113524	cak assembly factor, putative	20.8027	2	2	1840	1315	1320	1073	1073	1	284	284	23	23	8	20.8027	67	Schisto_mansoni.Chr_W	36582408	36592011	21.0656	2	2	1840	1147	1157	952	952	1	236	236	19	19	8	21.0656	60	Schisto_mansoni.Chr_W	36582408	36592011	22.0051	2	2	1840	1111	1116	960	960
Smp_165580	-1.13731	0.166096	rad25/xp-B DNA repair helicase, putative	9.85249	1	1	2310	381	674	381	638	0.597179	381	383	0	53	7	9.85249	15	Schisto_mansoni.Chr_W	17233560	17262659	12.1969	1	1	2310	418	739	418	692	0.604046	418	419	0	68	7	12.1969	16	Schisto_mansoni.Chr_W	17233560	17262659	10.9549	1	1	2310	342	630	342	600
Smp_137610	-1.13714	0.0103778	tyrosine kinase	19.2555	1	1	2916	2110	2122	1574	1574	1	763	763	20	20	20	19.2555	51	Schisto_mansoni.Chr_W	4805772	4878913	18.2212	1	1	2916	1737	1757	1305	1305	1	620	620	15	15	20	18.2212	41	Schisto_mansoni.Chr_W	4805772	4878913	18.6149	1	1	2916	1682	1686	1287	1287
Smp_137240	-1.13692	0.0194339	phosphatidylserine receptor, putative	9.08146	1	1	2349	1423	1540	592	598	0.989967	167	167	60	60	11	9.08146	7	Schisto_mansoni.SC_0176	132256	184603	8.82246	1	1	2349	1349	1479	503	509	0.988212	144	144	71	71	11	8.82246	4	Schisto_mansoni.SC_0176	132256	184603	9.76755	1	1	2349	1282	1365	541	544
Smp_044550	-1.13692	0.0455322	far upstream (fuse) binding protein, putative	333.243	7	6	2362	22085	22085	22065	22065	1	7710	7710	149	149	17	333.243	1094	Schisto_mansoni.Chr_W	13215655	13218322	340.131	7	6	2362	19752	19752	19732	19732	1	6783	6783	151	151	17	340.131	961.5	Schisto_mansoni.Chr_W	13215655	13218322	366.785	7	6	2362	20559	20559	20541	20541
Smp_157140	-1.13674	0.0171559	hypothetical protein	8.57389	2	2	2875	1473	1516	691	691	1	325	325	13	13	18	8.57389	23	Schisto_mansoni.Chr_W	38076643	38116044	7.85977	2	1	2875	1292	1322	555	555	1	280	280	7	7	18	7.85977	19	Schisto_mansoni.Chr_W	38076643	38116044	8.5233	2	2	2875	1167	1194	581	581
Smp_150690	-1.13666	0.0338265	proliferation-associated protein 2G4, 38kDa (M24 family)	105.575	2	2	1211	3584	3584	3584	3584	1	2627	2627	79	79	13	105.575	311	Schisto_mansoni.SC_0041	431203	432766	111.117	2	2	1211	3305	3305	3305	3305	1	2442	2442	76	76	13	111.117	280	Schisto_mansoni.SC_0041	431203	432766	118.31	2	2	1211	3397	3397	3397	3397
Smp_001830	-1.13663	0.0214183	60S ribosomal protein L24, putative	450.572	2	2	593	7496	7496	7490	7490	1	1959	1959	3	3	5	450.572	1352	Schisto_mansoni.Chr_6	1777804	1779029	469.219	2	2	593	6851	6851	6834	6834	1	1824	1824	3	3	5	469.219	1221	Schisto_mansoni.Chr_6	1777804	1779029	500.854	2	1	593	7048	7048	7042	7042
Smp_153090	-1.13661	0.844124		0.148637	1	1	720	3	3	3	3	1	2	2	0	0	4	0.148637	0	Schisto_mansoni.Chr_7	4534352	4543628	0.0565487	1	1	720	4	4	1	1	1	1	1	0	0	4	0.0565487	0	Schisto_mansoni.Chr_7	4534352	4543628	0.0585784	1	1	720	3	3	1	1
Smp_036930	-1.1365	0.0292069		21.6619	1	1	1879	1290	1309	1141	1141	1	644	644	27	27	12	21.6619	62	Schisto_mansoni.SC_0222	276649	300522	21.4734	1	1	1879	1130	1160	991	991	1	550	550	9	9	12	21.4734	53	Schisto_mansoni.SC_0222	276649	300522	19.618	1	1	1879	995	1018	874	874
Smp_093450	-1.13641	0.0739235	hepatocellular carcinoma-associated antigen, putative	20.6246	1	1	1804	1125	1125	1043	1043	1	405	405	6	6	9	20.6246	60	Schisto_mansoni.Chr_4	164476	177812	21.486	1	1	1804	1044	1046	952	952	1	384	384	8	8	9	21.486	56	Schisto_mansoni.Chr_4	164476	177812	23.8704	1	1	1804	1098	1099	1021	1021
Smp_170800	-1.13603	0.00231047	cysteinyl-tRNA synthetase, putative	51.3656	2	2	2621	4026	4211	3774	3774	1	1852	1852	335	335	17	51.3656	140	Schisto_mansoni.Chr_1	26299065	26333529	52.4899	2	2	2621	3612	3776	3379	3379	1	1743	1743	282	282	17	52.4899	127	Schisto_mansoni.Chr_1	26299065	26333529	52.7004	2	2	2621	3460	3594	3275	3275
Smp_145570	-1.13599	0.520727	hypothetical protein	2.39905	1	1	684	46	46	46	46	1	0	0	0	0	1	2.39905	7	Schisto_mansoni.Chr_W	17761199	17761882	2.6191	1	1	684	44	44	44	44	1	0	0	0	0	1	2.6191	7	Schisto_mansoni.Chr_W	17761199	17761882	1.72652	1	1	684	28	28	28	28
Smp_053130	-1.13596	0.0394366	40S ribosomal protein S6, putative	416.055	1	1	834	9767	9767	9727	9727	1	621	621	1	1	2	416.055	1314	Schisto_mansoni.SC_0041	916671	920639	439.762	1	1	834	9053	9053	9008	9008	1	563	563	1	1	2	439.762	1212.5	Schisto_mansoni.SC_0041	916671	920639	475.117	1	1	834	9436	9436	9395	9395
Smp_150700	-1.1359	0.57936	pol-related	11.0363	1	1	960	356	357	297	297	1	203	203	3	3	8	11.0363	32	Schisto_mansoni.SC_0041	302194	318802	7.54925	1	1	960	203	205	178	178	1	122	122	2	2	8	7.54925	19	Schisto_mansoni.SC_0041	302194	318802	10.2366	1	1	960	276	278	233	233
Smp_013470	-1.13548	0.0294061	ribosomal protein S2, putative	535.258	2	2	863	12949	12949	12949	12949	1	1155	1155	3	3	3	535.258	1607	Schisto_mansoni.Chr_3	8324374	8325273	548.261	2	2	863	11621	11621	11621	11621	1	1133	1133	11	11	3	548.261	1421	Schisto_mansoni.Chr_3	8324374	8325273	600.489	2	2	863	12287	12287	12287	12287
Smp_198820	-1.13537	0.140911	hypothetical protein	15.101	1	1	789	423	426	334	334	1	121	121	21	21	5	15.101	57	Schisto_mansoni.SC_0111	231153	240044	14.0877	1	1	789	369	373	273	273	1	118	118	15	15	5	14.0877	45	Schisto_mansoni.SC_0111	231153	240044	16.6781	1	1	789	392	398	312	312
Smp_038510	-1.13504	0.0615067	60S ribosomal protein L6, putative	549.799	2	2	929	14318	14318	14318	14318	1	6394	6394	30	30	6	549.799	1973	Schisto_mansoni.Chr_W	26129665	26130661	566.724	2	2	929	12931	12931	12931	12931	1	5861	5861	15	15	6	566.724	1800	Schisto_mansoni.Chr_W	26129665	26130661	636.778	2	2	929	14026	14026	14026	14026
Smp_123720	-1.13502	0.00886155	sodium/solute symporter, putative	5.55707	1	1	2388	757	854	370	372	0.994624	200	200	27	27	12	5.55707	19	Schisto_mansoni.Chr_4	17040956	17082434	5.3366	1	1	2388	632	699	312	313	0.996805	186	186	12	12	12	5.3366	15	Schisto_mansoni.Chr_4	17040956	17082434	5.52815	1	1	2388	586	653	312	313
Smp_090340	-1.13491	0.100609	hypothetical protein	11.6493	1	1	689	429	429	225	225	1	5	5	25	25	3	11.6493	31	Schisto_mansoni.Chr_2.unplaced.SC_0193	75840	83032	11.1095	1	1	689	335	335	188	188	1	3	3	28	28	3	11.1095	29	Schisto_mansoni.Chr_2.unplaced.SC_0193	75840	83032	11.8755	1	1	689	354	354	194	194
Smp_148910	-1.13485	0.340476	hypothetical protein	10.0134	1	1	399	112	112	112	112	1	0	0	0	0	1	10.0134	31	Schisto_mansoni.Chr_4.unplaced.SC_0032	1313917	1314315	7.44912	1	1	399	73	73	73	73	1	0	0	0	0	1	7.44912	19	Schisto_mansoni.Chr_4.unplaced.SC_0032	1313917	1314315	7.18796	1	1	399	68	68	68	68
Smp_173200	-1.1348	0.363436	hypothetical protein	21.337	1	1	321	344	345	192	192	1	0	0	65	65	2	21.337	62	Schisto_mansoni.Chr_5	1297170	1300418	17.8842	1	1	321	269	270	141	141	1	0	0	49	49	2	17.8842	49	Schisto_mansoni.Chr_5	1297170	1300418	23.2562	1	1	321	298	298	177	177
Smp_086600	-1.13472	0.0181362	arginine/serine-rich splicing factor, putative	63.1615	2	2	1142	1447	2270	1199	2022	0.592977	428	431	107	121	7	63.1615	205.5	Schisto_mansoni.Chr_3	6178125	6179884	59.4682	2	2	1142	1236	1900	1004	1668	0.601918	356	356	81	92	7	59.4682	163	Schisto_mansoni.Chr_3	6178125	6179884	66.0345	2	2	1142	1238	1967	1059	1788
Smp_153730	-1.1346	0.152709	hypothetical protein	11.9098	1	1	1261	421	421	421	421	1	0	0	0	0	1	11.9098	34	Schisto_mansoni.SC_0013	564379	565639	10.6873	1	1	1261	331	331	331	331	1	0	0	0	0	1	10.6873	27	Schisto_mansoni.SC_0013	564379	565639	9.96715	1	1	1261	298	298	298	298
Smp_006990	-1.13437	0.000617738	translation initiation factor IF-2, putative	37.1278	1	1	2035	2159	2159	2118	2118	1	515	515	5	5	6	37.1278	101	Schisto_mansoni.Chr_2	865	11186	35.8332	1	1	2035	1819	1822	1791	1791	1	464	464	4	4	6	35.8332	92	Schisto_mansoni.Chr_2	865	11186	37.0987	1	1	2035	1808	1811	1790	1790
Smp_148100	-1.13436	0.0635307	prokaryotic DNA topoisomerase, putative	76.8232	1	1	1042	2832	2838	2244	2244	1	1079	1079	54	54	6	76.8232	248	Schisto_mansoni.Chr_1	47030493	47041923	72.5212	1	1	1042	2435	2443	1856	1856	1	892	892	54	54	6	72.5212	209	Schisto_mansoni.Chr_1	47030493	47041923	68.2837	1	1	1042	2173	2178	1687	1687
Smp_087760	-1.13435	0.0933228	ferritin, putative	136.339	1	1	657	2533	2533	2511	2511	1	937	937	11	11	3	136.339	441	Schisto_mansoni.Chr_1.unplaced.SC_0076	998955	1000478	142.472	1	1	657	2338	2338	2299	2299	1	814	814	13	13	3	142.472	400	Schisto_mansoni.Chr_1.unplaced.SC_0076	998955	1000478	162.479	1	1	657	2568	2568	2531	2531
Smp_084380	-1.13434	0.00335798	cleavage and polyadenylation specificity factor- related	24.6058	1	1	2208	1651	1651	1523	1523	1	707	707	52	52	12	24.6058	76	Schisto_mansoni.Chr_3	14286359	14296382	24.2483	1	1	2208	1462	1462	1315	1315	1	584	584	48	48	12	24.2483	66	Schisto_mansoni.Chr_3	14286359	14296382	25.3288	1	1	2208	1434	1436	1326	1326
Smp_205300	-1.13433	0.643746		46.9907	1	1	249	415	438	326	328	0.993902	309	309	17	19	4	46.9907	15	Schisto_mansoni.SC_0276	20951	26123	23.5461	1	1	249	182	189	143	144	0.993056	136	137	7	7	4	23.5461	9	Schisto_mansoni.SC_0276	20951	26123	33.5379	1	1	249	240	249	196	198
Smp_199100	-1.13431	0.0853768	DNA repair helicase rad3/xp-d, putative	7.23328	1	1	2096	600	622	425	425	1	237	237	5	5	16	7.23328	21	Schisto_mansoni.SC_0208	101112	152691	7.7312	1	1	2096	594	622	398	398	1	227	227	5	5	16	7.7312	19	Schisto_mansoni.SC_0208	101112	152691	8.02881	1	1	2096	557	578	399	399
Smp_008620	-1.13407	0.00860733	RHBDF1 protein (S54 family)	33.2992	1	1	1052	1465	2000	982	982	1	396	396	133	133	8	33.2992	85	Schisto_mansoni.Chr_4.unplaced.SC_0032	14021	36379	34.5613	1	1	1052	1320	1882	893	893	1	364	364	101	101	8	34.5613	83	Schisto_mansoni.Chr_4.unplaced.SC_0032	14021	36379	32.2337	1	1	1052	1226	1724	804	804
Smp_060700	-1.13395	0.00601321	clathrin coat assembly protein ap19, putative	30.1442	1	1	813	838	839	687	687	1	222	222	5	5	3	30.1442	100	Schisto_mansoni.Chr_1	53009647	53015513	30.048	1	1	813	740	741	600	600	1	185	185	8	8	3	30.048	82	Schisto_mansoni.Chr_1	53009647	53015513	29.8814	1	1	813	705	706	576	576
Smp_124220	-1.13375	0.00649834	hypothetical protein	14.8604	1	1	6395	2932	2946	2664	2664	1	660	660	57	57	23	14.8604	39	Schisto_mansoni.Chr_1	6349240	6391832	14.5415	1	1	6395	2577	2591	2284	2284	1	557	557	62	62	23	14.5415	31	Schisto_mansoni.Chr_1	6349240	6391832	13.9225	1	1	6395	2287	2299	2111	2111
Smp_025380	-1.13327	0.069583	similar to 16 kDa calcium-binding protein	183.059	1	1	737	3850	3851	3782	3782	1	1284	1284	3	3	3	183.059	572	Schisto_mansoni.Chr_W	35770949	35779865	198.161	1	1	737	3631	3631	3587	3587	1	1250	1250	3	3	3	198.161	553	Schisto_mansoni.Chr_W	35770949	35779865	208.994	1	1	737	3709	3709	3652	3652
Smp_066990	-1.13309	0.0747544	40s rRNA protein, putative	435.864	1	1	435	5315	5315	5315	5315	1	1399	1399	10	10	2	435.864	1398	Schisto_mansoni.Chr_4	9211750	9212217	448.146	1	1	435	4788	4788	4788	4788	1	1279	1279	9	9	2	448.146	1276	Schisto_mansoni.Chr_4	9211750	9212217	506.796	1	1	435	5227	5227	5227	5227
Smp_011450	-1.13298	0.0280772		27.2792	1	1	561	429	429	429	429	1	0	0	0	0	1	27.2792	89	Schisto_mansoni.Chr_2	26312967	26313527	28.1594	1	1	561	388	388	388	388	1	0	0	0	0	1	28.1594	80	Schisto_mansoni.Chr_2	26312967	26313527	27.8169	1	1	561	370	370	370	370
Smp_045060	-1.13297	0.0210146		40.7154	1	1	1238	1494	1514	1413	1413	1	408	408	2	2	4	40.7154	124	Schisto_mansoni.Chr_W	13705663	13719880	40.0244	1	1	1238	1283	1308	1217	1217	1	361	361	3	3	4	40.0244	101	Schisto_mansoni.Chr_W	13705663	13719880	42.9941	1	1	1238	1312	1327	1262	1262
Smp_169200	-1.13273	0.00902334	hypothetical protein	355.02	1	1	543	5598	5599	5404	5404	1	2568	2568	16	16	3	355.02	1116	Schisto_mansoni.Chr_1	55361347	55368799	378.882	1	1	543	5204	5206	5053	5053	1	2400	2400	23	23	3	378.882	1029	Schisto_mansoni.Chr_1	55361347	55368799	359.47	1	1	543	4808	4809	4628	4628
Smp_172150	-1.13265	0.618049	ATP-dependent RNA helicase, putative	0.395435	1	1	4691	137	138	52	52	1	12	12	6	6	25	0.395435	1	Schisto_mansoni.Chr_1	52162147	52200754	0.399252	1	1	4691	127	128	46	46	1	15	15	8	8	25	0.399252	1	Schisto_mansoni.Chr_1	52162147	52200754	0.224773	1	1	4691	86	86	25	25
Smp_077720	-1.13263	0.0127117	annexin, putative	430.155	1	1	1200	14841	14994	14470	14470	1	10041	10041	20	20	10	430.155	1294	Schisto_mansoni.Chr_6	19430888	19460055	443.658	1	1	1200	13372	13497	13076	13076	1	9226	9226	23	23	10	443.658	1185	Schisto_mansoni.Chr_6	19430888	19460055	409.709	1	1	1200	11906	12019	11657	11657
Smp_123410	-1.13257	0.0113689	DEAD box ATP-dependent RNA helicase, putative	35.8317	2	2	1572	1649	1649	1579	1579	1	496	496	26	26	10	35.8317	107	Schisto_mansoni.Chr_2.unplaced.SC_0171	74348	81209	38.2804	2	2	1572	1533	1533	1478	1478	1	446	446	29	29	10	38.2804	98	Schisto_mansoni.Chr_2.unplaced.SC_0171	74348	81209	37.6422	2	2	1572	1455	1455	1403	1403
Smp_129770	-1.13236	0.0177898	ankyrin repeat domain, putative	56.4802	1	1	3398	5757	5809	5380	5380	1	1396	1396	153	153	11	56.4802	181	Schisto_mansoni.Chr_W	49215833	49244357	52.8169	1	1	3398	4765	4804	4408	4408	1	1201	1201	135	135	11	52.8169	141	Schisto_mansoni.Chr_W	49215833	49244357	52.0813	1	1	3398	4504	4540	4196	4196
Smp_000810	-1.13222	0.023336	tatd dnase-related	47.4483	2	2	1133	1512	1514	1507	1507	1	728	728	36	36	8	47.4483	144	Schisto_mansoni.Chr_1	65118379	65121754	49.3755	2	2	1133	1380	1380	1374	1374	1	657	657	33	33	8	49.3755	134	Schisto_mansoni.Chr_1	65118379	65121754	46.7551	2	2	1133	1260	1260	1256	1256
Smp_025370	-1.1322	0.00964795	lipopolysaccharide-induced transcription factor regulating tumor necrosis factor alpha, putative	371.184	1	1	496	5377	5395	5161	5161	1	2179	2179	1783	1783	4	371.184	1009	Schisto_mansoni.Chr_W	35796684	35808823	387.203	1	1	496	4899	4918	4717	4717	1	1984	1984	1565	1565	4	387.203	936.5	Schisto_mansoni.Chr_W	35796684	35808823	395.064	1	1	496	4800	4817	4646	4646
Smp_136970	-1.13214	0.00193866	Structural maintenance of chromosome 3 (Chondroitin sulfate proteoglycan 6) (Chromosome segregation protein SmcD) (Bamacan) (Basement membrane- associated chondroitin proteoglycan) (Mad member- interacting protein 1), putative	27.4782	1	1	3796	2998	3017	2924	2924	1	1632	1632	8	8	23	27.4782	76	Schisto_mansoni.Chr_4	26050749	26077918	26.0636	1	1	3796	2496	2514	2430	2430	1	1392	1392	10	10	23	26.0636	61	Schisto_mansoni.Chr_4	26050749	26077918	26.6658	1	1	3796	2453	2470	2400	2400
Smp_083740	-1.13213	0.00611997	centrin, putative	107.269	1	1	1139	3558	3608	3425	3425	1	1876	1876	18	18	6	107.269	326	Schisto_mansoni.Chr_1	37165831	37189484	108.669	1	1	1139	3171	3225	3040	3040	1	1640	1640	19	19	6	108.669	295	Schisto_mansoni.Chr_1	37165831	37189484	111.643	1	1	1139	3123	3164	3015	3015
Smp_149860	-1.1321	0.505391	hypothetical protein	1.79647	1	1	417	35	35	21	21	1	10	10	0	0	3	1.79647	5	Schisto_mansoni.Chr_4	3852853	3868960	1.75748	1	1	417	23	23	18	18	1	9	9	0	0	3	1.75748	5	Schisto_mansoni.Chr_4	3852853	3868960	1.61828	1	1	417	20	20	16	16
Smp_175820	-1.13194	0.5439	hypothetical protein	5.6482	1	1	360	57	57	57	57	1	0	0	0	0	1	5.6482	17	Schisto_mansoni.SC_0184	432360	432719	4.2977	1	1	360	38	38	38	38	1	0	0	0	0	1	4.2977	12	Schisto_mansoni.SC_0184	432360	432719	4.3348	1	1	360	37	37	37	37
Smp_206110	-1.13191	0.372349		3.1476	1	1	204	0	18	0	18	0	0	0	0	0	1	3.1476	9	Schisto_mansoni.SC_1373	4057	4260	3.39292	1	1	204	1	17	1	17	0.0588235	0	0	0	0	1	3.39292	7	Schisto_mansoni.SC_1373	4057	4260	2.68771	1	1	204	0	13	0	13
Smp_088620	-1.13184	0.0188643	protease, putative	64.9254	1	1	789	1813	2108	1436	1436	1	735	735	265	265	5	64.9254	187	Schisto_mansoni.Chr_2	1244901	1252956	70.7998	1	1	789	1721	1978	1372	1372	1	687	687	244	244	5	70.7998	172	Schisto_mansoni.Chr_2	1244901	1252956	66.1245	1	1	789	1573	1797	1237	1237
Smp_085290	-1.13175	0.00145299	tropomyosin, putative	204.371	3	3	1502	9277	9471	8605	8605	1	5219	5219	67	67	12	204.371	675.5	Schisto_mansoni.Chr_1.unplaced.SC_0094	892782	916860	204.931	3	3	1502	8122	8307	7560	7560	1	4605	4605	59	59	12	204.931	609	Schisto_mansoni.Chr_1.unplaced.SC_0094	892782	916860	197.488	3	3	1502	7464	7630	7033	7033
Smp_146830	-1.13165	0.00394286	hypothetical protein	35.8224	1	1	1431	1768	1859	1437	1437	1	232	232	153	153	5	35.8224	100	Schisto_mansoni.Chr_W	36857842	36879623	34.0572	1	1	1431	1463	1532	1197	1197	1	192	192	107	107	5	34.0572	83	Schisto_mansoni.Chr_W	36857842	36879623	34.4839	1	1	1431	1445	1500	1170	1170
Smp_004780	-1.1316	0.00249981	immunophilin, putative	657.322	3	3	1454	26792	26792	26792	26792	1	11633	11633	66	66	11	657.322	2074.5	Schisto_mansoni.Chr_2	26134048	26135662	661.998	3	3	1454	23641	23641	23641	23641	1	10294	10294	62	62	11	661.998	1801	Schisto_mansoni.Chr_2	26134048	26135662	693.996	3	3	1454	23925	23925	23925	23925
Smp_064860	-1.13153	0.00298431	heat shock protein 70 (hsp70)-interacting protein, putative	437.035	1	1	1035	12831	12841	12680	12680	1	1148	1148	9	9	2	437.035	1244	Schisto_mansoni.Chr_W	38063913	38072063	429.455	1	1	1035	11098	11103	10917	10917	1	1024	1024	9	9	2	429.455	1077	Schisto_mansoni.Chr_W	38063913	38072063	455.628	1	1	1035	11364	11374	11181	11181
Smp_076710	-1.13151	0.0334417	hypothetical protein	9.32686	1	1	1113	291	291	291	291	1	41	41	32	32	3	9.32686	27	Schisto_mansoni.Chr_1	11811781	11812935	10.0965	1	1	1113	276	276	276	276	1	40	40	24	24	3	10.0965	25	Schisto_mansoni.Chr_1	11811781	11812935	9.43569	1	1	1113	249	249	249	249
Smp_131110	-1.1315	0.750011	hypothetical protein	0.13962	6	3	2044	456	544	8	8	1	0	0	0	0	11	0.13962	0	Schisto_mansoni.Chr_4	28102745	28131568	0.0796772	6	3	2044	481	596	4	4	1	0	0	0	0	11	0.0796772	0	Schisto_mansoni.Chr_4	28102745	28131568	0.14444	6	2	2044	405	482	7	7
Smp_042420	-1.13147	0.0920375	zinc finger protein, putative	9.56976	1	1	876	530	549	235	235	1	1	1	18	18	3	9.56976	23	Schisto_mansoni.Chr_4	18987112	19000574	10.2252	1	1	876	452	469	220	220	1	1	1	26	26	3	10.2252	21	Schisto_mansoni.Chr_4	18987112	19000574	9.48488	1	1	876	445	460	197	197
Smp_040680	-1.13125	0.0160313	cytoplasmic dynein light chain, putative	387.569	1	1	502	3727	5525	3656	5454	0.670334	754	768	272	272	2	387.569	821	Schisto_mansoni.Chr_1	61664228	61665885	391.74	1	1	502	3257	4873	3214	4830	0.665424	586	604	212	212	2	391.74	675.5	Schisto_mansoni.Chr_1	61664228	61665885	357.911	1	1	502	2944	4322	2882	4260
Smp_038140	-1.13114	0.079963	Golgin IMH1, putative	25.1966	1	1	2530	2042	2047	1787	1787	1	446	446	13	13	7	25.1966	75	Schisto_mansoni.Chr_W	53032845	53050752	24.3968	1	1	2530	1729	1733	1516	1516	1	345	345	17	17	7	24.3968	59	Schisto_mansoni.Chr_W	53032845	53050752	21.755	1	1	2530	1503	1507	1305	1305
Smp_206300	-1.13114	0.54969		1.14023	1	1	219	7	7	7	7	1	0	0	0	0	1	1.14023	3	Schisto_mansoni.SC_2440	906	1124	1.30139	1	1	219	7	7	7	7	1	0	0	0	0	1	1.30139	3	Schisto_mansoni.SC_2440	906	1124	0.770346	1	1	219	4	4	4	4
Smp_046550	-1.13094	0.0402325	bystin, putative	37.9435	1	1	1194	1422	1442	1270	1270	1	743	743	15	15	8	37.9435	109	Schisto_mansoni.Chr_6	6195085	6205710	40.9878	1	1	1194	1348	1369	1202	1202	1	710	710	13	13	8	40.9878	101	Schisto_mansoni.Chr_6	6195085	6205710	42.0351	1	1	1194	1313	1324	1190	1190
Smp_074780	-1.13093	0.0485851	40S ribosomal protein S18, putative	375.364	1	1	513	5429	5429	5398	5398	1	1490	1490	10	10	3	375.364	1255	Schisto_mansoni.Chr_3	7588008	7589542	399.928	1	1	513	5062	5062	5039	5039	1	1398	1398	6	6	3	399.928	1141	Schisto_mansoni.Chr_3	7588008	7589542	425.135	1	1	513	5191	5191	5171	5171
Smp_022960	-1.1308	0.048853	aldehyde dehydrogenase, putative	62.2522	1	1	1781	3423	3433	3108	3108	1	1832	1832	31	31	12	62.2522	185	Schisto_mansoni.Chr_7	7593433	7615053	58.1578	1	1	1781	2793	2795	2544	2544	1	1540	1540	30	30	12	58.1578	152	Schisto_mansoni.Chr_7	7593433	7615053	66.4261	1	1	1781	3035	3037	2805	2805
Smp_196900	-1.13075	0.724711	hypothetical protein	0.137241	1	1	3639	29	29	14	14	1	4	4	3	3	21	0.137241	0	Schisto_mansoni.Chr_1	52389528	52431274	0.179016	1	1	3639	31	32	16	16	1	8	8	1	1	21	0.179016	0	Schisto_mansoni.Chr_1	52389528	52431274	0.0695407	1	1	3639	20	20	6	6
Smp_204150	-1.13067	0.271524		3.63334	1	1	756	65	77	65	77	0.844156	0	0	0	0	1	3.63334	9.5	Schisto_mansoni.Chr_W	24336781	24337536	3.60834	1	1	756	49	67	49	67	0.731343	0	0	0	0	1	3.60834	11	Schisto_mansoni.Chr_W	24336781	24337536	4.29575	1	1	756	63	77	63	77
Smp_036570	-1.13045	0.0747044	hypothetical protein	21.8001	1	1	558	355	355	341	341	1	66	66	10	10	3	21.8001	70	Schisto_mansoni.Chr_W	11967791	11971840	19.1901	1	1	558	276	276	263	263	1	58	58	7	7	3	19.1901	53	Schisto_mansoni.Chr_W	11967791	11971840	19.0474	1	1	558	258	258	252	252
Smp_145660	-1.13029	0.00789578	hypothetical protein	57.2355	1	1	718	1447	1492	1152	1152	1	442	442	13	13	3	57.2355	202.5	Schisto_mansoni.Chr_5	4384967	4403571	56.8196	1	1	718	1240	1274	1002	1002	1	389	389	8	8	3	56.8196	177	Schisto_mansoni.Chr_5	4384967	4403571	56.0394	1	1	718	1152	1180	954	954
Smp_034300	-1.13027	0.297909	hypothetical protein	9.04622	1	1	627	170	170	159	159	1	24	24	5	5	2	9.04622	28	Schisto_mansoni.Chr_2	7007612	7009507	6.75337	1	1	627	129	129	104	104	1	16	16	1	1	2	6.75337	18	Schisto_mansoni.Chr_2	7007612	7009507	7.93751	1	1	627	139	139	118	118
Smp_122940	-1.13019	0.0327425	family C86 unassigned peptidase (C86 family)	17.7772	1	1	903	617	631	450	450	1	176	176	21	21	6	17.7772	52	Schisto_mansoni.Chr_2	18219535	18235753	17.9002	1	1	903	565	573	397	397	1	165	165	20	20	6	17.9002	45	Schisto_mansoni.Chr_2	18219535	18235753	19.4301	1	1	903	551	558	416	416
Smp_056080	-1.12984	0.373956	rhodopsin-like orphan GPCR, putative	0.400581	1	1	1692	19	19	19	19	1	0	0	0	0	1	0.400581	1	Schisto_mansoni.Chr_1	62711383	62713074	0.505329	1	1	1692	21	21	21	21	1	0	0	0	0	1	0.505329	1	Schisto_mansoni.Chr_1	62711383	62713074	0.498539	1	1	1692	20	20	20	20
Smp_175210	-1.12979	0.0163695		261.139	1	1	309	2262	2262	2262	2262	1	0	0	0	0	1	261.139	803	Schisto_mansoni.Chr_4	18730499	18730807	275.123	1	1	309	2088	2088	2088	2088	1	0	0	0	0	1	275.123	738	Schisto_mansoni.Chr_4	18730499	18730807	286.499	1	1	309	2099	2099	2099	2099
Smp_028440	-1.12969	0.0699479	adenosylhomocysteinase, putative	67.664	2	2	1715	3291	3291	3253	3253	1	1257	1257	19	19	10	67.664	229	Schisto_mansoni.Chr_W.unplaced.SC_0115	757023	762302	67.9692	2	2	1715	2904	2904	2863	2863	1	1099	1099	16	16	10	67.9692	196	Schisto_mansoni.Chr_W.unplaced.SC_0115	757023	762302	74.4666	2	2	1715	3066	3066	3028	3028
Smp_148820	-1.12967	0.360455	hypoxanthine-guanine phosphoribosyltransferase, putative	15.2809	1	1	684	555	580	269	293	0.918089	200	200	69	72	7	15.2809	28	Schisto_mansoni.Chr_4.unplaced.SC_0032	1730697	1733587	19.2265	1	1	684	609	642	293	323	0.907121	215	219	74	76	7	19.2265	26	Schisto_mansoni.Chr_4.unplaced.SC_0032	1730697	1733587	18.5601	1	1	684	537	573	269	301
Smp_072900	-1.12967	0.0128472	hsp90 co-chaperone (tebp), putative	730.903	2	2	732	15089	15089	14998	14998	1	8235	8235	767	767	7	730.903	2528.5	Schisto_mansoni.Chr_3.unplaced.SC_0077	1487097	1488705	765.91	2	2	732	13897	13897	13770	13770	1	7550	7550	745	745	7	765.91	2302	Schisto_mansoni.Chr_3.unplaced.SC_0077	1487097	1488705	798.125	2	2	732	13978	13978	13852	13852
Smp_054770	-1.12962	0.00912655	hypothetical protein	15.0276	1	1	2013	1060	1060	848	848	1	409	409	41	41	11	15.0276	41	Schisto_mansoni.Chr_1	42645555	42663553	15.2909	1	1	2013	953	954	756	756	1	342	342	38	38	11	15.2909	37	Schisto_mansoni.Chr_1	42645555	42663553	14.855	1	1	2013	864	866	709	709
Smp_172250	-1.12961	0.0884534		67.6068	1	1	3473	6656	6666	6582	6582	1	3	3	6	6	2	67.6068	190	Schisto_mansoni.Chr_6	4050412	4071014	64.7009	1	1	3473	5582	5594	5519	5519	1	3	3	9	9	2	64.7009	153	Schisto_mansoni.Chr_6	4050412	4071014	57.7816	1	1	3473	4811	4822	4758	4758
Smp_026310	-1.12953	0.341523	zinc binding dehydrogenase, putative	65.7945	1	1	1176	2267	2267	2169	2169	1	410	410	65	65	4	65.7945	215	Schisto_mansoni.Chr_3	13500267	13503587	51.4824	1	1	1176	1577	1577	1487	1487	1	248	248	54	54	4	51.4824	136	Schisto_mansoni.Chr_3	13500267	13503587	72.9839	1	1	1176	2134	2134	2035	2035
Smp_199960	-1.12952	0.237357	DNA polymerase zeta catalytic subunit, putative	5.65307	1	1	732	155	155	116	116	1	66	66	3	3	5	5.65307	18	Schisto_mansoni.SC_0138	478476	483203	5.89589	1	1	732	136	136	106	106	1	62	62	2	2	5	5.89589	14	Schisto_mansoni.SC_0138	478476	483203	5.12801	1	1	732	122	122	89	89
Smp_121140	-1.12949	0.0520666	hypothetical protein	13.5866	2	2	1683	887	892	641	641	1	235	235	54	54	8	13.5866	40	Schisto_mansoni.SC_0136	789600	801988	15.0716	2	2	1683	840	853	623	623	1	230	230	55	55	8	15.0716	33	Schisto_mansoni.SC_0136	789600	801988	13.9084	2	2	1683	743	750	555	555
Smp_062620	-1.12937	0.148872		85.5222	1	1	2851	5850	6835	5850	6835	0.855889	2	2	344	360	2	85.5222	235	Schisto_mansoni.Chr_W	25594192	25597072	99.824	1	1	2851	6022	6990	6022	6990	0.861516	2	2	349	364	2	99.824	243	Schisto_mansoni.Chr_W	25594192	25597072	87.7702	1	1	2851	5130	5933	5130	5933
Smp_081570	-1.12906	0.0193802	ebna2 binding protein P100, putative	48.201	1	1	2426	3398	3398	3278	3278	1	711	711	11	11	6	48.201	142	Schisto_mansoni.Chr_3.unplaced.SC_0220	31392	38704	52.2448	1	1	2426	3217	3217	3113	3113	1	641	641	29	29	6	52.2448	133	Schisto_mansoni.Chr_3.unplaced.SC_0220	31392	38704	52.7814	1	1	2426	3118	3118	3036	3036
Smp_124440	-1.12891	0.00116006	glycerol kinase, putative	47.5196	1	1	2153	3528	3536	2868	2868	1	1401	1401	111	111	14	47.5196	150	Schisto_mansoni.Chr_2	19187524	19215655	48.0714	1	1	2153	3087	3097	2542	2542	1	1220	1220	88	88	14	48.0714	131	Schisto_mansoni.Chr_2	19187524	19215655	48.4451	1	1	2153	2952	2958	2473	2473
Smp_166800	-1.12887	0.2032		7.75934	1	1	1062	342	351	231	231	1	93	93	6	6	7	7.75934	25	Schisto_mansoni.Chr_3	2301704	2315890	8.51105	1	1	1062	330	337	222	222	1	94	94	15	15	7	8.51105	22.5	Schisto_mansoni.Chr_3	2301704	2315890	9.69025	1	1	1062	341	354	244	244
SmFKB12	-1.12878	0.0110767	immunophilin FK506 binding protein FKBP12, putative	337.526	1	1	431	4078	4078	4078	4078	1	1389	1389	6	6	2	337.526	1082	Schisto_mansoni.Chr_1	10375045	10375513	364.452	1	1	431	3858	3858	3858	3858	1	1375	1375	18	18	2	364.452	1020	Schisto_mansoni.Chr_1	10375045	10375513	357.668	1	1	431	3655	3655	3655	3655
Smp_009430	-1.12876	0.00582977	steroid dehydrogenase, putative	53.6464	1	1	1040	1668	1676	1564	1564	1	177	177	5	5	3	53.6464	164	Schisto_mansoni.SC_0442	19087	25228	55.5525	1	1	1040	1509	1518	1419	1419	1	144	144	3	3	3	55.5525	147	Schisto_mansoni.SC_0442	19087	25228	56.3704	1	1	1040	1472	1477	1390	1390
Smp_140310	-1.12868	0.0692227	paxillin-related	36.6091	1	1	381	1513	1514	391	391	1	157	157	61	61	3	36.6091	75	Schisto_mansoni.Chr_2.unplaced.SC_0108	281599	298362	39.967	1	1	381	1400	1401	374	374	1	160	160	65	65	3	39.967	73	Schisto_mansoni.Chr_2.unplaced.SC_0108	281599	298362	38.9661	1	1	381	1223	1223	352	352
Smp_035260	-1.1286	0.000741799	epidermal growth factor receptor kinase substrate eps8-related protein	131.341	1	1	1584	7456	7467	5832	5832	1	3369	3369	121	121	13	131.341	385	Schisto_mansoni.Chr_1	14353179	14387229	133.763	1	1	1584	6611	6615	5204	5204	1	2953	2953	128	128	13	133.763	333	Schisto_mansoni.Chr_1	14353179	14387229	128.766	1	1	1584	6113	6116	4836	4836
Smp_158600	-1.12828	0.00167907	oligosaccharyl transferase, putative	97.4819	1	1	2798	7875	7914	7646	7646	1	2561	2561	19	19	10	97.4819	292	Schisto_mansoni.SC_0142	441626	458208	96.7237	1	1	2798	6829	6859	6647	6647	1	2272	2272	23	23	10	96.7237	246	Schisto_mansoni.SC_0142	441626	458208	95.1004	1	1	2798	6473	6498	6309	6309
Smp_128900	-1.12821	0.713846	hypothetical protein	0.381018	1	1	749	8	8	8	8	1	0	0	0	0	1	0.381018	0	Schisto_mansoni.Chr_1	21620809	21621557	0.597951	1	1	749	11	11	11	11	1	0	0	0	0	1	0.597951	1	Schisto_mansoni.Chr_1	21620809	21621557	0.337862	1	1	749	6	6	6	6
Smp_194140	-1.12819	0.880501	aspartyl-tRNA synthetase, putative	4.50661	1	1	657	235	271	83	83	1	28	28	22	22	6	4.50661	11	Schisto_mansoni.SC_0273	91425	100795	0.0619712	1	1	657	45	59	0	1	0	0	1	0	0	6	0.0619712	0	Schisto_mansoni.SC_0273	91425	100795	8.21702	1	1	657	369	421	127	128
Smp_132440	-1.12809	0.136513	hypothetical protein	3.95156	2	1	1968	246	246	218	218	1	17	17	27	27	7	3.95156	11	Schisto_mansoni.SC_0170	535894	542403	3.93082	2	1	1968	230	230	190	190	1	9	9	25	25	7	3.93082	9	Schisto_mansoni.SC_0170	535894	542403	4.37195	2	1	1968	239	239	204	204
Smp_124870	-1.12806	0.41138	hypothetical protein	4.13358	1	1	863	55	100	55	100	0.55	0	0	0	0	1	4.13358	6	Schisto_mansoni.Chr_1	32787092	32787954	5.75578	1	1	863	67	122	67	122	0.54918	0	0	0	0	1	5.75578	9	Schisto_mansoni.Chr_1	32787092	32787954	5.13155	1	1	863	59	105	59	105
Smp_034500	-1.1278	0.26225	dual specificity protein phosphatase, putative	14.5805	1	1	1879	926	927	768	768	1	121	121	6	6	4	14.5805	41	Schisto_mansoni.Chr_1	19904237	19917818	12.5244	1	1	1879	694	697	578	578	1	94	94	5	5	4	12.5244	31	Schisto_mansoni.Chr_1	19904237	19917818	16.2511	1	1	1879	814	815	724	724
Smp_065130	-1.12759	0.0107838	hypothetical protein	17.1519	2	2	2319	1735	1739	1115	1115	1	570	570	64	64	15	17.1519	45	Schisto_mansoni.Chr_2	21168908	21195984	16.9953	2	2	2319	1569	1572	968	968	1	475	475	64	64	15	16.9953	35	Schisto_mansoni.Chr_2	21168908	21195984	17.7508	2	2	2319	1490	1492	976	976
Smp_061200	-1.12753	0.0717424	60S ribosomal protein L35a, putative	372.109	1	1	443	4621	4621	4621	4621	1	1092	1092	0	0	2	372.109	1030	Schisto_mansoni.SC_0062	1473372	1473852	393.824	1	1	443	4285	4285	4285	4285	1	1043	1043	3	3	2	393.824	972	Schisto_mansoni.SC_0062	1473372	1473852	429.762	1	1	443	4514	4514	4514	4514
Smp_085500	-1.12752	0.0544544	histone acetyltransferase-related	34.7795	1	1	1757	1813	1818	1713	1713	1	1087	1087	28	28	14	34.7795	99	Schisto_mansoni.SC_0179	383881	395342	37.2159	1	1	1757	1706	1709	1606	1606	1	1015	1015	27	27	14	37.2159	93	Schisto_mansoni.SC_0179	383881	395342	39.5599	1	1	1757	1724	1725	1648	1648
Smp_051260	-1.1275	0.0401473	60S ribosomal protein L8, putative	652.981	1	1	827	15163	15163	15138	15138	1	4133	4133	147	147	4	652.981	2049	Schisto_mansoni.SC_0062	429617	431813	646.813	1	1	827	13168	13168	13138	13138	1	3637	3637	152	152	4	646.813	1719	Schisto_mansoni.SC_0062	429617	431813	723.731	1	1	827	14214	14214	14191	14191
Smp_194040	-1.12744	0.738766	hypothetical protein	1.02131	1	1	978	28	28	28	28	1	0	0	0	0	2	1.02131	3	Schisto_mansoni.SC_0013	1427309	1431080	0.832619	1	1	978	20	20	20	20	1	0	0	0	0	2	0.832619	2	Schisto_mansoni.SC_0013	1427309	1431080	1.76813	1	1	978	41	41	41	41
Smp_158280	-1.12727	0.0633395	zinc finger protein, putative	14.9711	1	1	498	264	264	209	209	1	197	197	11	11	6	14.9711	45	Schisto_mansoni.Chr_2.unplaced.SC_0120	258164	269990	14.9616	1	1	498	234	234	183	183	1	170	170	10	10	6	14.9616	40	Schisto_mansoni.Chr_2.unplaced.SC_0120	258164	269990	16.1761	1	1	498	234	234	191	191
Smp_009690	-1.12726	0.016982	60S acidic ribosomal protein P0, putative	635.198	2	2	1321	23522	23522	23522	23522	1	4330	4330	63	63	5	635.198	1986	Schisto_mansoni.SC_0187	76180	77562	657.821	2	2	1321	21343	21343	21343	21343	1	3982	3982	78	78	5	657.821	1826	Schisto_mansoni.SC_0187	76180	77562	696.917	2	2	1321	21828	21828	21828	21828
Smp_164160	-1.12721	0.0327058	tumor differentially expressed protein, putative	55.0546	1	1	2470	4121	4259	3699	3812	0.970357	779	852	102	108	8	55.0546	177	Schisto_mansoni.Chr_6	19737795	19754227	57.7923	1	1	2470	3857	3994	3393	3506	0.96777	721	785	109	118	8	57.7923	159	Schisto_mansoni.Chr_6	19737795	19754227	57.7322	1	1	2470	3638	3767	3274	3381
Smp_140060	-1.12717	0.351468	hypothetical protein	2.54328	1	1	3198	365	386	228	228	1	41	41	7	7	10	2.54328	7	Schisto_mansoni.Chr_7	5989286	6026238	2.17707	1	1	3198	292	312	171	171	1	31	31	15	15	10	2.17707	4	Schisto_mansoni.Chr_7	5989286	6026238	1.75405	1	1	3198	209	222	133	133
Smp_018760	-1.12713	0.00176522	neutral alpha-glucosidase ab precursor (glucosidase II alpha subunit) (alpha glucosidase 2), putative	110.99	1	1	3458	11115	11119	10759	10759	1	2357	2357	48	48	8	110.99	299.5	Schisto_mansoni.SC_0170	553113	567346	111.701	1	1	3458	9787	9789	9487	9487	1	2073	2073	58	58	8	111.701	247	Schisto_mansoni.SC_0170	553113	567346	109.185	1	1	3458	9202	9208	8952	8952
Smp_162660	-1.12704	0.0986782	glutamine-dependent NAD(+) synthetase, putative	8.15379	1	1	1680	786	876	326	384	0.848958	67	70	59	61	6	8.15379	20	Schisto_mansoni.Chr_3	6996476	7004801	8.38536	1	1	1680	699	791	288	346	0.83237	59	73	48	51	6	8.38536	19	Schisto_mansoni.Chr_3	6996476	7004801	8.78675	1	1	1680	594	676	294	350
Smp_135570	-1.12699	0.0163425	actin-like protein	22.4383	1	1	1062	672	672	668	668	1	411	411	9	9	8	22.4383	69	Schisto_mansoni.Chr_4	11455467	11460111	23.5779	1	1	1062	618	618	615	615	1	364	364	9	9	8	23.5779	60	Schisto_mansoni.Chr_4	11455467	11460111	24.6228	1	1	1062	627	627	620	620
Smp_123165	-1.1269	0.0200607	dynactin P62 subunit, putative	61.7943	1	1	2155	2929	3965	2801	3733	0.750335	1460	1460	14	14	9	61.7943	185	Schisto_mansoni.Chr_6	2446267	2471843	62.0078	1	1	2155	2528	3497	2384	3282	0.726386	1227	1227	10	11	9	62.0078	161	Schisto_mansoni.Chr_6	2446267	2471843	59.595	1	1	2155	2293	3227	2192	3045
Smp_188670	-1.12685	0.0167182	bestrophin-related	198.647	1	1	554	3085	3085	3085	3085	1	1210	1210	6	6	3	198.647	632	Schisto_mansoni.Chr_1.unplaced.SC_0034	1834138	1834759	184.32	1	1	554	2508	2508	2508	2508	1	939	939	11	11	3	184.32	505	Schisto_mansoni.Chr_1.unplaced.SC_0034	1834138	1834759	185.683	1	1	554	2439	2439	2439	2439
Smp_150360	-1.12669	0.0292949	ubiquitin--protein ligase edd, putative	17.4665	1	1	9789	5564	5576	4793	4793	1	1316	1316	403	403	37	17.4665	30	Schisto_mansoni.Chr_1	27386893	27420120	16.9074	1	1	9789	4738	4752	4065	4065	1	1118	1118	320	320	37	16.9074	21	Schisto_mansoni.Chr_1	27386893	27420120	17.5013	1	1	9789	4671	4681	4062	4062
Smp_058850	-1.12644	0.393858	hypothetical protein	36.9152	1	1	603	632	632	624	624	1	72	72	0	0	2	36.9152	111	Schisto_mansoni.Chr_4	15195316	15197599	41.6603	1	1	603	629	630	617	617	1	77	77	0	0	2	41.6603	114	Schisto_mansoni.Chr_4	15195316	15197599	29.4466	1	1	603	429	430	421	421
Smp_205900	-1.12629	0.815393		1.08099	1	1	330	11	11	10	10	1	0	0	5	5	2	1.08099	2	Schisto_mansoni.SC_0810	6208	6702	0.370137	1	1	330	4	4	3	3	1	0	0	2	2	2	0.370137	0	Schisto_mansoni.SC_0810	6208	6702	0.766844	1	1	330	6	6	6	6
Smp_091660	-1.12614	0.0478386	hypothetical protein	83.6114	1	1	698	1636	1636	1636	1636	1	0	0	0	0	1	83.6114	266	Schisto_mansoni.Chr_6	4195157	4195854	90.4714	1	1	698	1551	1551	1551	1551	1	0	0	0	0	1	90.4714	251	Schisto_mansoni.Chr_6	4195157	4195854	88.7034	1	1	698	1468	1468	1468	1468
Smp_142850	-1.126	0.0514118	smap1, putative	57.9683	1	1	1160	1949	1957	1885	1885	1	911	911	33	33	7	57.9683	178	Schisto_mansoni.Chr_W	53059183	53064979	50.9289	1	1	1160	1506	1513	1451	1451	1	705	705	35	35	7	50.9289	130	Schisto_mansoni.Chr_W	53059183	53064979	55.6292	1	1	1160	1581	1583	1530	1530
Smp_202980	-1.12574	0.0699032		80.8584	1	1	180	408	408	408	408	1	0	0	0	0	1	80.8584	220.5	Schisto_mansoni.Chr_6	6886403	6886582	87.085	1	1	180	385	385	385	385	1	0	0	0	0	1	87.085	208	Schisto_mansoni.Chr_6	6886403	6886582	83.8842	1	1	180	358	358	358	358
Smp_084440	-1.12545	0.218116	hypothetical protein	14.2422	1	1	794	1576	1971	250	317	0.788644	0	0	106	106	3	14.2422	14	Schisto_mansoni.Chr_W	20792746	20831214	13.2811	1	1	794	1445	1744	210	259	0.810811	0	0	88	88	3	13.2811	9	Schisto_mansoni.Chr_W	20792746	20831214	14.3421	1	1	794	1363	1699	215	270
Smp_084460	-1.12524	0.0749332	60S ribosomal protein L28, putative	403.719	1	1	498	5636	5636	5636	5636	1	694	694	3	3	2	403.719	1200.5	Schisto_mansoni.Chr_W	20787882	20788416	429.797	1	1	498	5257	5257	5257	5257	1	627	627	5	5	2	429.797	1099	Schisto_mansoni.Chr_W	20787882	20788416	471.902	1	1	498	5572	5572	5572	5572
Smp_150710	-1.1252	0.0872733	hypothetical protein	7.98988	1	1	1710	393	393	383	383	1	63	63	1	1	4	7.98988	23	Schisto_mansoni.SC_0041	273961	278438	7.28585	1	1	1710	316	316	306	306	1	52	52	0	0	4	7.28585	17	Schisto_mansoni.SC_0041	273961	278438	7.47337	1	1	1710	310	311	303	303
Smp_126920	-1.12516	0.00214982	organic solute transporter, putative	38.0694	1	1	1548	1719	1726	1652	1652	1	746	746	37	37	9	38.0694	108	Schisto_mansoni.Chr_4	7802719	7813668	38.3742	1	1	1548	1516	1524	1459	1459	1	651	651	42	42	9	38.3742	97	Schisto_mansoni.Chr_4	7802719	7813668	37.4902	1	1	1548	1423	1424	1376	1376
Smp_155220	-1.1251	0.00651291	family M16 unassigned peptidase (M16 family)	29.6833	1	1	1620	1623	1635	1348	1348	1	772	772	13	13	13	29.6833	86	Schisto_mansoni.Chr_5	8694573	8725609	28.8524	1	1	1620	1410	1438	1148	1148	1	652	652	8	8	13	28.8524	71	Schisto_mansoni.Chr_5	8694573	8725609	29.133	1	1	1620	1307	1334	1119	1119
Smp_074570	-1.12496	0.273816	conserved Schistosoma protein, unknown function	31.8612	1	1	730	1002	1002	652	652	1	621	621	25	25	9	31.8612	101	Schisto_mansoni.SC_0356	10851	25227	31.7912	1	1	730	848	848	570	570	1	539	539	19	19	9	31.7912	85	Schisto_mansoni.SC_0356	10851	25227	39.2876	1	1	730	989	989	680	680
Smp_034010	-1.12493	0.301988	12-lipoxygenase), putative	10.158	1	1	892	287	287	254	254	1	130	130	16	16	6	10.158	30	Schisto_mansoni.Chr_1	23685819	23690872	7.98782	1	1	892	201	201	175	175	1	79	79	10	10	6	7.98782	21	Schisto_mansoni.Chr_1	23685819	23690872	8.3218	1	1	892	192	192	176	176
Smp_161530	-1.12492	0.370305	myocyte-specific enhancer factor 2a, putative	27.6492	1	1	2223	2082	2088	1723	1723	1	541	541	147	147	10	27.6492	73	Schisto_mansoni.SC_0049	988219	1018489	20.1835	1	1	2223	1365	1370	1102	1102	1	328	328	78	78	10	20.1835	48	Schisto_mansoni.SC_0049	988219	1018489	21.8376	1	1	2223	1322	1326	1151	1151
Smp_049250	-1.12489	0.0174528	major egg antigen, p40	584.182	1	1	1005	9670	16499	9629	16458	0.585065	2174	4049	1570	1652	5	584.182	1618	Schisto_mansoni.Chr_1	48997719	48999319	604.973	1	1	1005	8881	14973	8841	14933	0.592044	2160	3754	1403	1505	5	604.973	1413	Schisto_mansoni.Chr_1	48997719	48999319	575.53	1	1	1005	7897	13742	7869	13714
Smp_146970	-1.12475	0.010347		112.091	1	1	1737	5571	5571	5458	5458	1	452	452	6	6	2	112.091	410	Schisto_mansoni.Chr_2	33340615	33345520	109.863	1	1	1737	4753	4753	4687	4687	1	355	355	6	6	2	109.863	342	Schisto_mansoni.Chr_2	33340615	33345520	114.267	1	1	1737	4805	4805	4706	4706
Smp_205990	-1.12474	0.02853		22.1964	1	1	360	228	317	201	224	0.897321	114	119	5	5	3	22.1964	69	Schisto_mansoni.SC_1145	571	5539	23.9766	1	1	360	224	277	192	212	0.90566	105	106	6	9	3	23.9766	67	Schisto_mansoni.SC_1145	571	5539	23.9	1	1	360	204	266	187	204
Smp_050940	-1.12471	0.0544185	60S ribosomal protein L11, putative	248.981	2	2	881	6149	6149	6149	6149	1	1704	1704	1	1	5	248.981	803	Schisto_mansoni.Chr_6	14087884	14088794	258.848	2	2	881	5601	5601	5601	5601	1	1542	1542	1	1	5	258.848	730	Schisto_mansoni.Chr_6	14087884	14088794	283.841	2	2	881	5929	5929	5929	5929
Smp_199860	-1.12457	0.0923116	6-phosphogluconate dehydrogenase, putative	127.238	1	1	494	1808	1960	1706	1762	0.968218	700	700	252	252	4	127.238	409.5	Schisto_mansoni.SC_0581	231	2380	120.909	1	1	494	1521	1677	1415	1467	0.964554	617	617	233	233	4	120.909	341	Schisto_mansoni.SC_0581	231	2380	125.846	1	1	494	1510	1671	1413	1474
Smp_025410	-1.12454	0.0640468	calmodulin, putative	47.6412	1	1	614	873	874	820	820	1	1	1	355	355	3	47.6412	72	Schisto_mansoni.Chr_W	35724966	35729664	49.1366	1	1	614	793	794	741	741	1	4	4	338	338	3	49.1366	58.5	Schisto_mansoni.Chr_W	35724966	35729664	49.4577	1	1	614	770	770	720	720
Smp_090690	-1.12452	0.00803005	hypothetical protein	62.8384	1	1	1237	2535	2654	2179	2179	1	1333	1333	81	81	10	62.8384	189	Schisto_mansoni.Chr_4	16826058	16849292	63.9526	1	1	1237	2268	2365	1943	1943	1	1220	1220	58	58	10	63.9526	168	Schisto_mansoni.Chr_4	16826058	16849292	63.6567	1	1	1237	2169	2245	1867	1867
Smp_120420	-1.12446	0.372187	tyrosine-protein kinase fps85d, putative	5.87867	1	1	267	48	51	44	44	1	43	43	0	0	2	5.87867	14	Schisto_mansoni.SC_0181	23656	26392	4.57472	1	1	267	32	32	30	30	1	30	30	0	0	2	4.57472	7	Schisto_mansoni.SC_0181	23656	26392	6.63449	1	1	267	42	43	41	42
Smp_136530	-1.12442	0.129732	ankyrin repeat-containing, putative	19.1158	1	1	1659	2024	2045	889	889	1	149	149	49	49	6	19.1158	55	Schisto_mansoni.Chr_W	54476603	54497361	17.0566	1	1	1659	1625	1641	695	695	1	108	108	31	31	6	17.0566	43	Schisto_mansoni.Chr_W	54476603	54497361	15.7113	1	1	1659	1417	1432	618	618
Smp_194730	-1.12442	0.0218574	hypothetical protein	15.0949	1	1	4925	2446	2452	2084	2084	1	685	685	113	113	19	15.0949	38	Schisto_mansoni.Chr_3	80066	117858	15.4593	1	1	4925	2216	2232	1870	1870	1	595	595	88	88	19	15.4593	32	Schisto_mansoni.Chr_3	80066	117858	14.7296	1	1	4925	2003	2013	1720	1720
Smp_171500	-1.12438	0.350706		3.63137	1	1	501	2312	2379	51	51	1	0	0	0	0	3	3.63137	0	Schisto_mansoni.Chr_4.unplaced.SC_0032	2407785	2436345	3.98211	1	1	501	2568	2650	49	49	1	0	0	1	1	3	3.98211	0	Schisto_mansoni.Chr_4.unplaced.SC_0032	2407785	2436345	2.77809	1	1	501	1886	1957	33	33
Smp_199250	-1.12435	0.0660684		18.9665	1	1	363	193	193	193	193	1	0	0	0	0	1	18.9665	57	Schisto_mansoni.SC_0237	231403	231765	20.6379	1	1	363	184	184	184	184	1	0	0	0	0	1	20.6379	53	Schisto_mansoni.SC_0237	231403	231765	20.2168	1	1	363	174	174	174	174
Smp_095140	-1.12432	0.0461421	Hypothetical protein, putative	24.5519	1	1	1081	744	744	744	744	1	0	0	0	0	1	24.5519	74	Schisto_mansoni.Chr_W	16705236	16706316	24.1051	1	1	1081	640	640	640	640	1	0	0	0	0	1	24.1051	66	Schisto_mansoni.Chr_W	16705236	16706316	27.2332	1	1	1081	698	698	698	698
Smp_024780	-1.12428	0.132559	hypothetical protein	54.1049	2	2	4641	8817	9092	6775	7039	0.962495	1107	1108	313	318	14	54.1049	150	Schisto_mansoni.Chr_4	11718884	11746176	51.2425	2	2	4641	7229	7503	5591	5841	0.957199	948	951	266	268	14	51.2425	118	Schisto_mansoni.Chr_4	11718884	11746176	51.137	2	2	4641	6970	7197	5408	5627
Smp_139620	-1.12412	0.126597	hypothetical protein	13.1142	1	1	1254	510	510	461	461	1	89	89	42	42	5	13.1142	36	Schisto_mansoni.SC_0125	623840	627478	11.5911	1	1	1254	410	410	357	357	1	59	59	38	38	5	11.5911	28	Schisto_mansoni.SC_0125	623840	627478	13.8906	1	1	1254	466	466	413	413
Smp_003970	-1.12408	0.0133901	elongation factor -1 beta,delta, putative	168.531	1	1	809	4139	4152	3822	3822	1	2708	2708	71	71	7	168.531	562	Schisto_mansoni.Chr_1	5948588	5958047	174.687	1	1	809	3774	3787	3471	3471	1	2425	2425	70	70	7	174.687	517	Schisto_mansoni.Chr_1	5948588	5958047	183.825	1	1	809	3783	3793	3526	3526
Smp_104580	-1.12402	0.0406909	ribulose-phosphate 3-epimerase	81.7919	1	1	963	2650	2659	2208	2208	1	1183	1183	15	15	6	81.7919	255	Schisto_mansoni.Chr_2	4347135	4361522	84.136	1	1	963	2395	2405	1990	1990	1	1113	1113	20	20	6	84.136	232	Schisto_mansoni.Chr_2	4347135	4361522	82.2506	1	1	963	2271	2276	1878	1878
Smp_173660	-1.124	0.0630575	hypothetical protein	42.0224	1	1	309	364	364	364	364	1	0	0	0	0	1	42.0224	129	Schisto_mansoni.Chr_1.unplaced.SC_0135	16288	16596	45.0633	1	1	309	342	342	342	342	1	0	0	0	0	1	45.0633	137	Schisto_mansoni.Chr_1.unplaced.SC_0135	16288	16596	41.494	1	1	309	304	304	304	304
Smp_005260	-1.12376	0.0331594	RNA and export factor binding protein, putative	97.7352	2	2	1368	3951	4034	3748	3748	1	1754	1754	22	22	7	97.7352	188.5	Schisto_mansoni.SC_0137	55040	61918	99.1388	2	2	1368	3514	3567	3331	3331	1	1542	1542	15	15	7	99.1388	175.5	Schisto_mansoni.SC_0137	55040	61918	107.599	2	2	1368	3684	3750	3490	3490
Smp_054750	-1.12367	0.0191075	brat protein, putative	63.6299	1	1	712	1270	1270	1270	1270	1	366	366	12	12	3	63.6299	183	Schisto_mansoni.Chr_1	42617264	42618041	65.0755	1	1	712	1138	1138	1138	1138	1	345	345	12	12	3	65.0755	171	Schisto_mansoni.Chr_1	42617264	42618041	65.9303	1	1	712	1113	1113	1113	1113
Smp_200940	-1.1234	0.807974		0.488669	1	1	438	9	9	6	6	1	1	1	0	0	2	0.488669	1	Schisto_mansoni.Chr_1	3161531	3162569	0.650697	1	1	438	8	8	7	7	1	0	0	1	1	2	0.650697	1	Schisto_mansoni.Chr_1	3161531	3162569	0.0962932	1	1	438	3	3	1	1
Smp_131620	-1.12333	0.0812198	hypothetical protein	1.93325	1	1	3672	268	270	199	199	1	44	44	37	37	21	1.93325	5	Schisto_mansoni.Chr_2	33419504	33461428	1.88496	1	1	3672	236	237	170	170	1	43	43	30	30	21	1.88496	4	Schisto_mansoni.Chr_2	33419504	33461428	1.84924	1	1	3672	210	211	161	161
Smp_053610	-1.12328	0.00149367	seryl-tRNA synthetase	148.029	1	1	1985	8348	8349	8237	8237	1	4230	4230	28	28	11	148.029	430	Schisto_mansoni.Chr_4	14284419	14301849	145.323	1	1	1985	7190	7190	7085	7085	1	3535	3535	23	23	11	145.323	380	Schisto_mansoni.Chr_4	14284419	14301849	149.285	1	1	1985	7103	7106	7026	7026
Smp_210610	-1.12316	0.0309678		41.8072	1	1	1605	2162	2217	1881	1881	1	269	269	11	11	5	41.8072	127	Schisto_mansoni.Chr_3.unplaced.SC_0077	472369	496052	41.3239	1	1	1605	1854	1907	1629	1629	1	240	240	16	16	5	41.3239	108	Schisto_mansoni.Chr_3.unplaced.SC_0077	472369	496052	37.9194	1	1	1605	1583	1618	1443	1443
Smp_146190	-1.12313	0.0603509	40S ribosomal protein S21e, putative	670.773	1	1	346	6506	6506	6506	6506	1	2346	2346	12	12	3	670.773	2004	Schisto_mansoni.Chr_W	13152122	13152536	665.562	1	1	346	5656	5656	5656	5656	1	2074	2074	8	8	3	665.562	1737.5	Schisto_mansoni.Chr_W	13152122	13152536	749.18	1	1	346	6146	6146	6146	6146
Smp_124640	-1.12313	0.0267725	dna2/nam7 helicase family member, putative	9.60511	1	1	4635	1464	1468	1248	1248	1	225	225	123	123	18	9.60511	23	Schisto_mansoni.Chr_2	25628977	25662300	8.74034	1	1	4635	1164	1170	995	995	1	165	165	106	106	18	8.74034	18	Schisto_mansoni.Chr_2	25628977	25662300	9.55453	1	1	4635	1238	1243	1050	1050
Smp_066720	-1.12302	0.299054	transcriptional adaptor 2 (ada2)-related	7.41651	1	1	582	121	121	121	121	1	85	85	0	0	5	7.41651	21	Schisto_mansoni.Chr_2.unplaced.SC_0120	199969	200690	6.92576	1	1	582	99	99	99	99	1	60	60	1	1	5	6.92576	18	Schisto_mansoni.Chr_2.unplaced.SC_0120	199969	200690	5.58004	1	1	582	77	77	77	77
Smp_038560	-1.12297	0.00635833	Prothymosin alpha-B, putative	682.002	7	7	871	16652	16652	16652	16652	1	13199	13199	117	117	17	682.002	2004	Schisto_mansoni.Chr_W	30638962	30639868	664.015	7	7	871	14205	14205	14205	14205	1	11161	11161	123	123	17	664.015	1705	Schisto_mansoni.Chr_W	30638962	30639868	696.807	7	7	871	14390	14390	14390	14390
Smp_153390	-1.12291	0.00539616	ectonucleotide pyrophosphatase/phosphodiesterase, putative	252.52	2	2	1853	13199	13202	13117	13117	1	2691	2691	10	10	5	252.52	838	Schisto_mansoni.Chr_5	2485104	2490831	246.509	2	2	1853	11292	11292	11219	11219	1	2401	2401	12	12	5	246.509	719	Schisto_mansoni.Chr_5	2485104	2490831	251.101	2	2	1853	11092	11093	11032	11032
Smp_145420	-1.12286	0.197677	plexin, putative	14.4509	1	1	8672	3770	3775	3513	3513	1	1183	1183	198	198	33	14.4509	32	Schisto_mansoni.Chr_4	12590275	12659933	13.7235	1	1	8672	3159	3161	2923	2923	1	924	924	205	205	33	13.7235	27	Schisto_mansoni.Chr_4	12590275	12659933	11.7989	1	1	8672	2592	2596	2426	2426
Smp_210600	-1.12263	0.210956	aspartyl aminopeptidase (M18 family)	18.7767	1	1	2523	1328	1328	1328	1328	1	32	32	71	71	3	18.7767	48	Schisto_mansoni.Chr_3.unplaced.SC_0077	457637	460614	17.2672	1	1	2523	1073	1074	1070	1070	1	30	30	67	67	3	17.2672	37	Schisto_mansoni.Chr_3.unplaced.SC_0077	457637	460614	14.577	1	1	2523	873	873	872	872
Smp_127030	-1.12231	0.0850412	invadolysin (M08 family)	4.8952	1	1	1953	672	676	268	268	1	140	140	8	8	13	4.8952	14	Schisto_mansoni.Chr_4	8391008	8411798	5.10762	1	1	1953	580	586	245	245	1	144	144	8	8	13	5.10762	13	Schisto_mansoni.Chr_4	8391008	8411798	4.72946	1	1	1953	527	530	219	219
Smp_140330	-1.1223	0.0614956	epsin 4/enthoprotin, putative	57.5736	1	1	1751	3562	3582	2826	2826	1	1114	1114	136	136	9	57.5736	161	Schisto_mansoni.Chr_2.unplaced.SC_0108	380376	398151	50.9926	1	1	1751	2793	2809	2193	2193	1	853	853	112	112	9	50.9926	121	Schisto_mansoni.Chr_2.unplaced.SC_0108	380376	398151	51.3295	1	1	1751	2608	2617	2131	2131
Smp_076740	-1.12166	0.0999099	30S ribosomal protein S8, putative	321.594	1	1	464	4183	4183	4183	4183	1	658	658	6	6	2	321.594	945.5	Schisto_mansoni.Chr_3	4461815	4462315	337.742	1	1	464	3849	3849	3849	3849	1	608	608	4	4	2	337.742	858.5	Schisto_mansoni.Chr_3	4461815	4462315	374.043	1	1	464	4115	4115	4115	4115
Smp_133500	-1.12163	0.601429	serine/threonine kinase	2.87023	1	0	87	72	75	7	7	1	0	0	7	7	2	2.87023	3	Schisto_mansoni.SC_0041	1068209	1070250	1.87196	1	0	87	56	56	4	4	1	0	0	4	4	2	1.87196	1	Schisto_mansoni.SC_0041	1068209	1070250	2.90872	1	0	87	67	69	6	6
Smp_199290	-1.12161	0.0767898	twik family of potassium channels-related	16.2149	1	1	561	257	257	255	255	1	54	54	0	0	2	16.2149	51	Schisto_mansoni.SC_0244	6360	7976	14.0797	1	1	561	195	195	194	194	1	32	32	2	2	2	14.0797	36	Schisto_mansoni.SC_0244	6360	7976	14.5099	1	1	561	194	194	193	193
Smp_137770	-1.12142	0.299052	hypothetical protein	8.61068	1	1	174	42	42	42	42	1	0	0	0	0	1	8.61068	25	Schisto_mansoni.SC_0194	154425	154598	7.25383	1	1	174	31	31	31	31	1	0	0	0	0	1	7.25383	19	Schisto_mansoni.SC_0194	154425	154598	6.54462	1	1	174	27	27	27	27
Smp_071540	-1.12141	0.095403	hypothetical protein	15.506	1	1	1194	656	658	519	519	1	69	69	53	53	5	15.506	45	Schisto_mansoni.Chr_1	22916475	22924877	18.3115	1	1	1194	688	690	537	537	1	70	70	70	70	5	18.3115	46	Schisto_mansoni.Chr_1	22916475	22924877	16.3548	1	1	1194	614	620	463	463
Smp_145250	-1.12129	0.00199392	hypothetical protein	22.7402	1	1	1404	1152	1160	895	895	1	440	440	82	82	10	22.7402	58	Schisto_mansoni.Chr_W	45796167	45809411	22.8225	1	1	1404	976	979	787	787	1	396	396	77	77	10	22.8225	53	Schisto_mansoni.Chr_W	45796167	45809411	22.41	1	1	1404	911	915	746	746
Smp_018720	-1.12118	0.433263	hypothetical protein	3.9844	1	1	573	70	70	64	64	1	42	42	3	3	5	3.9844	12	Schisto_mansoni.Chr_3	2954189	2959416	2.91329	1	1	573	46	46	41	41	1	27	27	2	2	5	2.91329	6	Schisto_mansoni.Chr_3	2954189	2959416	2.87065	1	1	573	44	44	39	39
Smp_179270	-1.12112	0.0295121	heterogeneous nuclear ribonucleoprotein (hnrnp), putative	78.0343	3	3	1616	4361	4361	3535	3535	1	1756	1756	127	127	14	78.0343	240	Schisto_mansoni.Chr_6	1229574	1235330	71.7552	3	3	1616	3552	3552	2848	2848	1	1405	1405	130	130	14	71.7552	191	Schisto_mansoni.Chr_6	1229574	1235330	78.7415	3	3	1616	3660	3660	3017	3017
Smp_207070	-1.12106	0.0105238	ethanolamine-phosphate cytidylyltransferase	30.4322	1	1	1763	1731	1736	1504	1504	1	750	750	19	19	11	30.4322	83	Schisto_mansoni.Chr_6	7241498	7269571	31.0617	1	1	1763	1557	1569	1345	1345	1	698	698	19	19	11	31.0617	75	Schisto_mansoni.Chr_6	7241498	7269571	32.1287	1	1	1763	1527	1537	1343	1343
Smp_165370	-1.12104	0.847023	hypothetical protein	0.46449	1	1	384	5	5	5	5	1	0	0	0	0	1	0.46449	1	Schisto_mansoni.Chr_4	20613351	20613734	0.636173	1	1	384	6	6	6	6	1	0	0	0	0	1	0.636173	1	Schisto_mansoni.Chr_4	20613351	20613734	0	1	0	384	0	0	0	0
Smp_001150	-1.12101	5.81641e-05	hypothetical protein	66.8363	1	1	1685	3417	3417	3157	3157	1	1033	1033	165	165	9	66.8363	197	Schisto_mansoni.Chr_1	63864753	63871268	67.4154	1	1	1685	3004	3004	2790	2790	1	888	888	159	159	9	67.4154	169	Schisto_mansoni.Chr_1	63864753	63871268	66.4811	1	1	1685	2909	2909	2656	2656
lcb1	-1.12096	0.00160927	serine palmitoyltransferase 1	69.0712	1	1	1788	3563	3571	3462	3462	1	780	780	16	16	5	69.0712	195	Schisto_mansoni.Chr_1	33317480	33326010	71.2741	1	1	1788	3239	3246	3130	3130	1	743	743	21	21	5	71.2741	186	Schisto_mansoni.Chr_1	33317480	33326010	68.4541	1	1	1788	3006	3012	2902	2902
Smp_138960	-1.12091	0.0379253	SPFH domain protein 1 precursor. , putative	15.237	1	1	1983	3466	4068	847	847	1	428	428	90	90	12	15.237	4	Schisto_mansoni.Chr_6	5949790	5998853	16.4462	1	1	1983	3158	3735	801	801	1	406	406	81	81	12	16.4462	2	Schisto_mansoni.Chr_6	5949790	5998853	16.6324	1	1	1983	2986	3561	782	782
Smp_138300	-1.12085	0.307044	tetraspanin, putative	6.79377	1	1	1612	460	468	307	307	1	118	118	9	9	8	6.79377	21	Schisto_mansoni.Chr_3	18882037	18896989	8.66331	1	1	1612	454	464	343	343	1	151	151	12	12	8	8.66331	23	Schisto_mansoni.Chr_3	18882037	18896989	8.71262	1	1	1612	447	455	333	333
Smp_163340	-1.1208	0.00938497	timeless, putative	8.4847	1	1	3847	1066	1069	915	915	1	434	434	9	9	21	8.4847	24	Schisto_mansoni.SC_0149	525941	551374	8.69971	1	1	3847	941	943	822	822	1	361	361	18	18	21	8.69971	19	Schisto_mansoni.SC_0149	525941	551374	8.68306	1	1	3847	904	905	792	792
Smp_141490	-1.1208	0.155135	ring finger protein 151 , putative	53.8145	1	1	818	1471	1471	1234	1234	1	546	546	7	7	2	53.8145	61	Schisto_mansoni.Chr_6	12558812	12564116	57.4391	1	1	818	1353	1353	1154	1154	1	549	549	9	9	2	57.4391	53	Schisto_mansoni.Chr_6	12558812	12564116	49.7558	1	1	818	1144	1144	965	965
Smp_180260	-1.12068	0.239946	Amiloride-sensitive sodium channel, putative	0.830981	1	1	1803	51	56	37	42	0.880952	1	1	3	3	4	0.830981	2	Schisto_mansoni.Chr_1.unplaced.SC_0076	13449	33081	0.925855	1	1	1803	48	50	39	41	0.95122	0	0	2	2	4	0.925855	2	Schisto_mansoni.Chr_1.unplaced.SC_0076	13449	33081	1.02926	1	1	1803	51	57	38	44
Smp_076050	-1.12054	0.0324104	hypothetical protein	18.7546	1	1	1554	1015	1038	817	817	1	280	280	26	26	7	18.7546	53	Schisto_mansoni.Chr_W	53382748	53399321	18.4449	1	1	1554	929	951	704	704	1	223	223	25	25	7	18.4449	45	Schisto_mansoni.Chr_W	53382748	53399321	19.2698	1	1	1554	913	928	710	710
Smp_170600	-1.12053	0.289119	hypothetical protein	3.27432	1	1	207	519	1558	19	19	1	0	0	2	2	2	3.27432	1	Schisto_mansoni.Chr_1	58815638	58824543	3.34375	1	1	207	494	1545	17	17	1	0	0	0	0	2	3.34375	0	Schisto_mansoni.Chr_1	58815638	58824543	3.66751	1	1	207	508	1553	18	18
Smp_138700	-1.1203	0.0650814	ARMC6-like protein	15.108	2	2	1752	779	780	742	742	1	257	257	8	8	6	15.108	48	Schisto_mansoni.Chr_4	19482623	19488870	14.8266	2	2	1752	685	685	638	638	1	197	197	9	9	6	14.8266	40	Schisto_mansoni.Chr_4	19482623	19488870	15.1421	2	2	1752	666	666	629	629
Smp_002550	-1.12028	0.00692604	serine/arginine rich splicing factor, putative	144.762	2	2	689	2803	2803	2796	2796	1	2110	2110	9	9	7	144.762	418	Schisto_mansoni.Chr_3	15186618	15188807	145.25	2	2	689	2468	2468	2458	2458	1	1878	1878	5	5	7	145.25	374	Schisto_mansoni.Chr_3	15186618	15188807	154.137	2	2	689	2521	2521	2518	2518
Smp_164400	-1.12025	0.879696		0.466311	1	1	459	6	6	6	6	1	0	0	0	0	1	0.466311	1	Schisto_mansoni.Chr_W	26246037	26246495	0.0887038	1	1	459	1	1	1	1	1	0	0	0	0	1	0.0887038	0	Schisto_mansoni.Chr_W	26246037	26246495	0.0918876	1	1	459	1	1	1	1
Smp_026100	-1.12018	0.256123	40S ribosomal protein S28, putative	258.628	1	0	160	1160	1160	1160	1160	1	0	0	1160	1160	4	258.628	1	Schisto_mansoni.Chr_5	214119	214686	302.055	1	0	160	1188	1188	1187	1187	1	0	0	1187	1187	4	302.055	1	Schisto_mansoni.Chr_5	214119	214686	340.575	1	0	160	1293	1293	1292	1292
Smp_174110	-1.12008	0.120014	protein phosphatase 1 regulatory inhibitor subunit 16a, putative	30.7076	1	1	1947	2044	2047	1676	1676	1	606	606	43	43	12	30.7076	87	Schisto_mansoni.Chr_W	27914049	27990547	28.8999	1	1	1947	1664	1668	1382	1382	1	530	530	42	42	12	28.8999	74	Schisto_mansoni.Chr_W	27914049	27990547	25.4532	1	1	1947	1385	1388	1175	1175
Smp_011230	-1.11994	0.0194231	glycosylphosphatidylinositol:protein transamidase (C13 family)	36.2529	1	1	738	790	794	750	750	1	466	466	13	13	6	36.2529	109	Schisto_mansoni.Chr_2	27094045	27099870	36.9635	1	1	738	697	699	670	670	1	437	437	9	9	6	36.9635	96	Schisto_mansoni.Chr_2	27094045	27099870	39.6047	1	1	738	738	743	693	693
tgl1	-1.11971	0.239728	sterol esterase 1	9.33322	1	1	967	368	368	253	253	1	73	73	9	9	4	9.33322	25	Schisto_mansoni.Chr_W	13223814	13232397	8.96826	1	1	967	340	340	213	213	1	63	63	6	6	4	8.96826	23	Schisto_mansoni.Chr_W	13223814	13232397	7.41468	1	1	967	253	253	170	170
Smp_149360	-1.11962	0.0102879	hypothetical protein	96.0422	1	1	793	2802	3350	2135	2135	1	1523	1523	29	29	6	96.0422	325	Schisto_mansoni.Chr_6	13922543	13935119	90.4151	1	1	793	2330	2826	1761	1761	1	1248	1248	31	31	6	90.4151	265	Schisto_mansoni.Chr_6	13922543	13935119	94.139	1	1	793	2311	2792	1770	1770
Smp_149680	-1.11949	0.25844	early growth response protein, putative	2.35869	1	1	1830	192	192	121	121	1	23	23	23	23	6	2.35869	6	Schisto_mansoni.SC_0239	39366	51424	2.87008	1	1	1830	208	208	129	129	1	21	21	32	32	6	2.87008	6	Schisto_mansoni.SC_0239	39366	51424	2.95004	1	1	1830	192	192	128	128
Smp_155450	-1.11948	0.136273	sh3 and multiple ankyrin repeat domains protein 1,2 (shank1,2), putative	15.8851	1	1	3117	2144	2146	1388	1388	1	393	393	264	264	15	15.8851	41	Schisto_mansoni.Chr_W	30065471	30117470	14.9693	1	1	3117	1869	1869	1146	1146	1	321	321	192	192	15	14.9693	32	Schisto_mansoni.Chr_W	30065471	30117470	13.1793	1	1	3117	1562	1562	974	974
Smp_168050	-1.11944	0.0144025	long-chain-fatty-acid--CoA ligase	20.4248	1	1	3411	1614	2123	1611	1953	0.824885	1611	1614	0	27	15	20.4248	31	Schisto_mansoni.Chr_W	15449231	15509673	20.8529	1	1	3411	1414	1891	1414	1747	0.809388	1414	1417	0	28	15	20.8529	31	Schisto_mansoni.Chr_W	15449231	15509673	21.1562	1	1	3411	1377	1845	1376	1711
Smp_000890	-1.1194	0.0661431	mitotic phosphoprotein 44	32.5748	1	1	783	744	747	715	715	1	264	264	7	7	5	32.5748	113	Schisto_mansoni.Chr_1	64878211	64883937	30.9393	1	1	783	618	621	595	595	1	248	248	3	3	5	30.9393	86	Schisto_mansoni.Chr_1	64878211	64883937	31.565	1	1	783	606	609	586	586
Smp_048030	-1.11938	0.3783	hypothetical protein	2.71314	1	1	710	55	55	54	54	1	5	5	24	24	3	2.71314	5	Schisto_mansoni.Chr_2	31230801	31231667	2.23646	1	1	710	40	40	39	39	1	8	8	14	14	3	2.23646	2	Schisto_mansoni.Chr_2	31230801	31231667	2.43554	1	1	710	41	41	41	41
Smp_093920	-1.11936	0.00980675	hypothetical protein	43.6295	1	1	2161	2889	2889	2643	2643	1	572	572	35	35	6	43.6295	125	Schisto_mansoni.Chr_W	17986625	17991754	44.5209	1	1	2161	2580	2580	2363	2363	1	489	489	40	40	6	44.5209	108	Schisto_mansoni.Chr_W	17986625	17991754	46.6068	1	1	2161	2602	2602	2388	2388
Smp_169620	-1.1193	0.224017	hypothetical protein	8.48528	1	1	618	449	462	147	147	1	68	68	50	50	5	8.48528	13.5	Schisto_mansoni.Chr_4	19323665	19329143	6.71996	1	1	618	394	405	102	102	1	42	42	40	40	5	6.71996	8	Schisto_mansoni.Chr_4	19323665	19329143	7.43888	1	1	618	413	419	109	109
Smp_137450	-1.11923	0.00421763		212.852	1	1	1505	8821	9570	8234	8980	0.916927	11	11	82	82	3	212.852	736	Schisto_mansoni.Chr_3.unplaced.SC_0083	174222	194670	211.502	1	1	1505	7726	8375	7171	7818	0.917242	13	13	75	75	3	211.502	625	Schisto_mansoni.Chr_3.unplaced.SC_0083	174222	194670	213.404	1	1	1505	7495	8120	6994	7615
Smp_048540	-1.11913	0.0685493	hypothetical protein	22.2132	1	1	1084	799	800	675	675	1	264	264	7	7	4	22.2132	70	Schisto_mansoni.Chr_W	20288631	20299140	20.3951	1	1	1084	636	639	543	543	1	210	210	8	8	4	20.3951	53	Schisto_mansoni.Chr_W	20288631	20299140	20.7769	1	1	1084	625	626	534	534
Smp_156040	-1.11904	0.097182	sugar transporter, putative	9.02574	1	1	4893	1405	1409	1238	1238	1	292	292	79	79	25	9.02574	1	Schisto_mansoni.Chr_4	538986	600635	8.45422	1	1	4893	1170	1178	1016	1016	1	216	216	47	47	25	8.45422	0	Schisto_mansoni.Chr_4	538986	600635	9.59378	1	1	4893	1241	1243	1113	1113
Smp_175950	-1.11902	0.042294	putative methyltransferase ncl1	10.7623	1	1	2244	713	713	677	677	1	196	196	2	2	7	10.7623	30	Schisto_mansoni.Chr_1.unplaced.SC_0153	711877	723432	12.0657	1	1	2244	694	695	665	665	1	202	202	5	5	7	12.0657	29	Schisto_mansoni.Chr_1.unplaced.SC_0153	711877	723432	11.9349	1	1	2244	659	659	635	635
Smp_143920	-1.11895	0.00871089	hypothetical protein	11.2651	1	1	3135	1138	1145	986	990	0.99596	357	357	101	101	16	11.2651	32	Schisto_mansoni.Chr_5	7170074	7197855	11.8184	1	1	3135	1055	1063	904	910	0.993407	283	283	89	89	16	11.8184	27	Schisto_mansoni.Chr_5	7170074	7197855	11.3412	1	1	3135	956	962	839	843
Smp_081190	-1.11894	0.00101827	Rho3 GTPase, putative	40.8951	1	1	1373	1574	1574	1574	1574	1	0	0	0	0	1	40.8951	121	Schisto_mansoni.Chr_1	18189615	18190987	40.3592	1	1	1373	1361	1361	1361	1361	1	0	0	0	0	1	40.3592	103	Schisto_mansoni.Chr_1	18189615	18190987	39.2889	1	1	1373	1279	1279	1279	1279
Smp_172520	-1.11887	0.0619156	hypothetical protein	47.7026	1	1	771	1162	1169	1031	1031	1	320	320	3	3	3	47.7026	142	Schisto_mansoni.Chr_6	9902049	9916859	43.7779	1	1	771	958	974	829	829	1	244	244	3	3	3	43.7779	113	Schisto_mansoni.Chr_6	9902049	9916859	43.9269	1	1	771	899	908	803	803
Smp_166340	-1.11871	0.00581632	hypothetical protein	376.552	1	1	745	8295	8296	7864	7864	1	3419	3419	59	59	3	376.552	1194	Schisto_mansoni.Chr_1	59132456	59139459	360.314	1	1	745	6890	6890	6593	6593	1	2982	2982	35	35	3	360.314	973	Schisto_mansoni.Chr_1	59132456	59139459	361.642	1	1	745	6666	6666	6388	6388
Smp_055050	-1.11868	0.0782033	40S ribosomal protein S17, putative	153.148	1	1	1078	4628	4628	4628	4628	1	1108	1108	9	9	3	153.148	13	Schisto_mansoni.Chr_4	24869697	24870846	160.481	1	1	1078	4249	4249	4249	4249	1	987	987	7	7	3	160.481	13	Schisto_mansoni.Chr_4	24869697	24870846	177.352	1	1	1078	4533	4533	4533	4533
Smp_146090	-1.11864	0.241995	rab geranylgeranyl transferase alpha subunit, putative	3.15936	1	1	892	122	271	78	79	0.987342	14	14	22	23	5	3.15936	9	Schisto_mansoni.Chr_2	27748380	27780107	3.24077	1	1	892	109	243	70	71	0.985915	12	12	21	21	5	3.24077	3	Schisto_mansoni.Chr_2	27748380	27780107	2.97883	1	1	892	86	192	62	63
Smp_127200	-1.11844	0.217181	hypothetical protein	41.2279	1	1	1188	1377	1377	1373	1373	1	657	657	39	39	6	41.2279	130	Schisto_mansoni.Chr_1	54075304	54078956	40.9207	1	1	1188	1198	1198	1194	1194	1	552	552	17	17	6	40.9207	116	Schisto_mansoni.Chr_1	54075304	54078956	49.2058	1	1	1188	1391	1391	1386	1386
Smp_141910	-1.11834	0.374854	sh3 and multiple ankyrin repeat domains protein 1,2 (shank1,2), putative	18.914	1	1	1920	1172	1172	1018	1018	1	511	511	5	5	11	18.914	53	Schisto_mansoni.Chr_W	12199790	12251909	14.0806	1	1	1920	769	770	664	664	1	317	317	4	4	11	14.0806	35	Schisto_mansoni.Chr_W	12199790	12251909	16.1017	1	1	1920	812	814	733	733
Smp_082990	-1.1183	0.0144989	cornichon, putative	103.028	1	1	885	2563	2563	2556	2556	1	1408	1408	319	319	9	103.028	343	Schisto_mansoni.Chr_1	39496709	39497959	101.121	1	1	885	2203	2203	2198	2198	1	1274	1274	277	277	9	101.121	293	Schisto_mansoni.Chr_1	39496709	39497959	108.086	1	1	885	2275	2275	2268	2268
Smp_123390	-1.11825	0.108136	requim, req/dpf2, putative	11.4164	1	1	1353	659	661	433	433	1	158	158	43	43	8	11.4164	30	Schisto_mansoni.Chr_2.unplaced.SC_0171	158910	173391	13.2708	1	1	1353	634	634	441	441	1	180	180	44	44	8	13.2708	31	Schisto_mansoni.Chr_2.unplaced.SC_0171	158910	173391	12.8119	1	1	1353	588	590	411	411
Smp_053470	-1.11822	0.109801	nucleolar protein NOP56, putative	10.845	1	1	1944	620	620	591	591	1	147	147	7	7	6	10.845	30	Schisto_mansoni.Chr_W	16401603	16407015	11.0794	1	1	1944	554	554	529	529	1	111	111	6	6	6	11.0794	28	Schisto_mansoni.Chr_W	16401603	16407015	11.3685	1	1	1944	540	540	524	524
Smp_161130	-1.11819	0.0875529	hypothetical protein	17.4892	1	1	1644	1262	1263	806	806	1	166	166	124	124	6	17.4892	48	Schisto_mansoni.Chr_W	48905176	48915815	14.8595	1	1	1644	950	950	600	600	1	127	127	85	85	6	14.8595	35	Schisto_mansoni.Chr_W	48905176	48915815	16.2395	1	1	1644	914	914	633	633
Smp_077900	-1.11812	0.668736		1.48455	1	1	817	11	34	11	34	0.323529	0	0	0	0	1	1.48455	4	Schisto_mansoni.Chr_3.unplaced.SC_0044	412069	412885	1.59471	1	1	817	7	32	7	32	0.21875	0	0	0	0	1	1.59471	5	Schisto_mansoni.Chr_3.unplaced.SC_0044	412069	412885	0.722729	1	1	817	2	14	2	14
Smp_153340	-1.118	0.00111508	ectonucleotide pyrophosphatase/phosphodiesterase, putative	73.3732	1	1	1689	3776	3783	3474	3474	1	764	764	63	63	5	73.3732	220	Schisto_mansoni.Chr_5	2329886	2335560	71.4261	1	1	1689	3226	3236	2963	2963	1	659	659	79	79	5	71.4261	185	Schisto_mansoni.Chr_5	2329886	2335560	73.6651	1	1	1689	3207	3211	2950	2950
Smp_136510	-1.11797	0.0744501	hypothetical protein	20.7427	1	1	2148	1675	1690	1249	1249	1	695	695	41	41	17	20.7427	61	Schisto_mansoni.Chr_W	54550321	54584098	18.045	1	1	2148	1266	1284	952	952	1	507	507	27	27	17	18.045	45	Schisto_mansoni.Chr_W	54550321	54584098	18.9872	1	1	2148	1231	1248	967	967
Smp_073830	-1.11796	0.00660464	cleavage and polyadenylation specificity factor, putative	24.8464	1	1	2033	1600	1604	1416	1416	1	923	923	23	23	15	24.8464	73	Schisto_mansoni.SC_0172	19661	38028	23.9524	1	1	2033	1351	1351	1196	1196	1	790	790	28	28	15	23.9524	62	Schisto_mansoni.SC_0172	19661	38028	25.31	1	1	2033	1377	1378	1220	1220
Smp_146750	-1.11795	0.269147	sodium/hydrogen exchanger, putative	16.8624	1	1	2289	1433	1433	1082	1082	1	0	0	365	365	3	16.8624	18	Schisto_mansoni.Chr_5	4036519	4039434	14.8702	1	1	2289	1151	1151	836	836	1	0	0	291	291	3	14.8702	13	Schisto_mansoni.Chr_5	4036519	4039434	12.7506	1	1	2289	952	952	692	692
Smp_009830	-1.11792	0.0612481	translocon-associated protein, beta subunit precursor (trap-beta) (signal sequence receptor beta subunit), putative	85.7908	1	1	689	1680	1680	1657	1657	1	357	357	152	152	4	85.7908	230	Schisto_mansoni.Chr_1.unplaced.SC_0010	3485447	3491426	87.2212	1	1	689	1499	1500	1476	1476	1	323	323	143	143	4	87.2212	189	Schisto_mansoni.Chr_1.unplaced.SC_0010	3485447	3491426	96.5956	1	1	689	1596	1596	1578	1578
Smp_169010	-1.11788	0.0658635	adenylate cyclase, putative	66.577	1	1	1354	3336	3753	2518	2527	0.996438	1095	1095	85	94	8	66.577	201	Schisto_mansoni.Chr_W	31706411	31719852	66.5153	1	1	1354	2936	3292	2203	2212	0.995931	950	950	69	78	8	66.5153	173	Schisto_mansoni.Chr_W	31706411	31719852	59.3398	1	1	1354	2455	2731	1900	1905
Smp_017420	-1.11787	0.0296272	hypothetical protein	44.3942	1	1	1133	1673	1832	1410	1410	1	278	278	4	4	3	44.3942	131	Schisto_mansoni.Chr_3.unplaced.SC_0174	201973	219332	44.7758	1	1	1133	1453	1607	1246	1246	1	226	226	3	3	3	44.7758	114	Schisto_mansoni.Chr_3.unplaced.SC_0174	201973	219332	43.9632	1	1	1133	1314	1440	1181	1181
Smp_099890	-1.11783	0.00225126	polyposis locus protein 1 homolog, putative	370.729	1	1	1437	15097	15437	14934	14934	1	5127	5127	39	39	5	370.729	1228	Schisto_mansoni.Chr_1	56440293	56446552	358.275	1	1	1437	12795	13082	12645	12645	1	4293	4293	35	35	5	358.275	1008	Schisto_mansoni.Chr_1	56440293	56446552	376.917	1	1	1437	12980	13307	12842	12842
Smp_007900	-1.11768	0.0511002	60S ribosomal protein L23, putative	310.797	2	2	852	7485	7485	7423	7423	1	2326	2326	19	19	5	310.797	210	Schisto_mansoni.Chr_1	63634011	63636014	321.467	2	2	852	6800	6800	6727	6727	1	2083	2083	26	26	5	321.467	163	Schisto_mansoni.Chr_1	63634011	63636014	350.233	2	2	852	7154	7154	7075	7075
Smp_035300	-1.11768	0.00656571	snare protein sec22, putative	60.6184	2	2	1124	2031	2032	1910	1910	1	554	554	57	57	6	60.6184	193	Schisto_mansoni.Chr_1	14295236	14304111	62.0868	2	2	1124	1824	1825	1714	1714	1	485	485	57	57	6	62.0868	169.5	Schisto_mansoni.Chr_1	14295236	14304111	60.6005	2	2	1124	1707	1708	1615	1615
Smp_127100	-1.11745	0.240951		6.25139	1	1	1341	418	419	235	235	1	73	73	14	14	5	6.25139	17	Schisto_mansoni.Chr_6	18242498	18256847	7.37789	1	1	1341	419	419	243	243	1	58	58	11	11	5	7.37789	19	Schisto_mansoni.Chr_6	18242498	18256847	7.26529	1	1	1341	401	401	231	231
[truncated: 11,899 more rows]
[truncated: 70 more columns]

## Sheet: control vs. fgfrA(RNAi)
Feature ID	Experiment - Fold Change (original values)	t-test: control vs fgfrA(RNAi) original values - P-value	Annotations - Database object name	Control A - Expression values	Control A - Transcripts annotated	Control A - Detected transcripts	Control A - Exon length	Control A - Unique gene reads	Control A - Total gene reads	Control A - Unique exon reads	Control A - Total exon reads	Control A - Ratio of unique to total (exon reads)	Control A - Unique exon-exon reads	Control A - Total exon-exon reads	Control A - Unique intron-exon reads	Control A - Total intron-exon reads	Control A - Exons	Control A - RPKM	Control A - Median coverage	Control A - Chromosome	Control A - Chromosome region start	Control A - Chromosome region end	Control B - Expression values	Control B - Transcripts annotated	Control B - Detected transcripts	Control B - Exon length	Control B - Unique gene reads	Control B - Total gene reads	Control B - Unique exon reads	Control B - Total exon reads	Control B - Ratio of unique to total (exon reads)	Control B - Unique exon-exon reads	Control B - Total exon-exon reads	Control B - Unique intron-exon reads	Control B - Total intron-exon reads	Control B - Exons	Control B - RPKM	Control B - Median coverage	Control B - Chromosome	Control B - Chromosome region start	Control B - Chromosome region end	Control C - Expression values	Control C - Transcripts annotated	Control C - Detected transcripts	Control C - Exon length	Control C - Unique gene reads	Control C - Total gene reads	Control C - Unique exon reads	Control C - Total exon reads
[truncated: 13,305 more rows]
[truncated: 70 more columns]

[truncated: 1 more sheets: control vs. h2b(RNAi)]
