# Supplementary material for: Stem cell progeny contribute to the schistosome host-parasite interface
Source: eLife journal article supplement (doi:10.7554/elife.12473), 2016-03-19
Supplement: supp [file elife-12473-supp-v1.zip › elife_poa_e12473_Supplementary_File_3.xlsx]

## Sheet: Sheet1
Gene Identity	Forward Primer	Reverse Primer	qPCR or Cloning?	Cloning Method	Plasmid Name
Smp_195190/Sm13	TTGTATTGTTTATGTTTGTTGAATTG	CATATACTTGACAACAATCCATTATGA	Cloning	TA	pBL47
Smp_003230/sh3 domain grb2-like protein B1 (endophilin B1)	CACTATAGAAGTGACCTTCGATTTTCGCAGATTGTTGA	CACTAAAGGGAGACCTTACGTAATGCCGATTCTACCG	Cloning	gib	pJC325
Smp_072190/Sm29	CACTATAGAAGTGACCTTTGGCTGGGAGTATATTGGAA	CACTAAAGGGAGACCTTTGATTCCTATGCAAACAAACAGA	Cloning	gib	pJC327
Smp_176940/cationic amino acid transporter	CATGTGCAGAAGAAGCCAAA	TCTCCATACTGGCCACAATTC	Cloning	TA	pJC365
Smp_181530/Sm-TSP-2	ATGGCTCTTGGTTGTGGGTA	CCGCGCTTTATAGCCAATAG	Cloning	TA	pJC398
Smp_195180/Sm25	GGATCGTTTGGAAACTATTCATT	TCAATGTAATCACAATACAACTACTCA	Cloning	TA	pJC399
Smp_081920/hypothetical protein (CD59-like/ly6)	AGATGTATCTTGTGCAAATTATACTGG	TCTTATGAATAATAAAGCAAACAAACA	Cloning	TA	pJC401
Smp_141010/fer-1-related	TGCAACAGTTGAAGTACCTATTTG	AGCAGCTGAATCAAAGAAATTG	Cloning	TA	pJC402
Smp_123550/venom allergen-like protein 8	CACTATAGAAGTGACCTTCACACAACCAAAAGATGCTCA	CACTAAAGGGAGACCTTTTGATGGCCAAATTGGTTTT	Cloning	gib	pJC330
Smp_139530/cellular tumor antigen P53	TTAGGACATGCGCAACTACG	CACGATCTGGAAAACGGAAA	Cloning	TA	pJC345
Smp_181530/Sm-TSP-2	ATCTAAGCAAAGCGCACCTC	CCGCGCTTTATAGCCAATAG	qPCR	N/A	N/A
Smp_900000/Sma_Cytochrome C oxidase I	GTGGGAGTCTTTGGTTGTTG	CCACCCACAACTTAGAAGCA	qPCR	N/A	N/A
Smp_082490/cyclin B	GCTTCTTTGCCTCAACTTCG	TGGATTTGCCTCTCCATCAC	qPCR	N/A	N/A
Smp_123550/venom allergen-like protein 8	GGTCCAGGAAACTATGAAGGTCG	GGACGTTTCGTAGTTGTAGGACGTT	qPCR	N/A	N/A
