# Supplementary figures and images for: Stem cell progeny contribute to the schistosome host-parasite interface
Source: eLife journal article supplement (doi:10.7554/elife.12473), 2016-03-19

Figure 1- Figure Supplement 1.

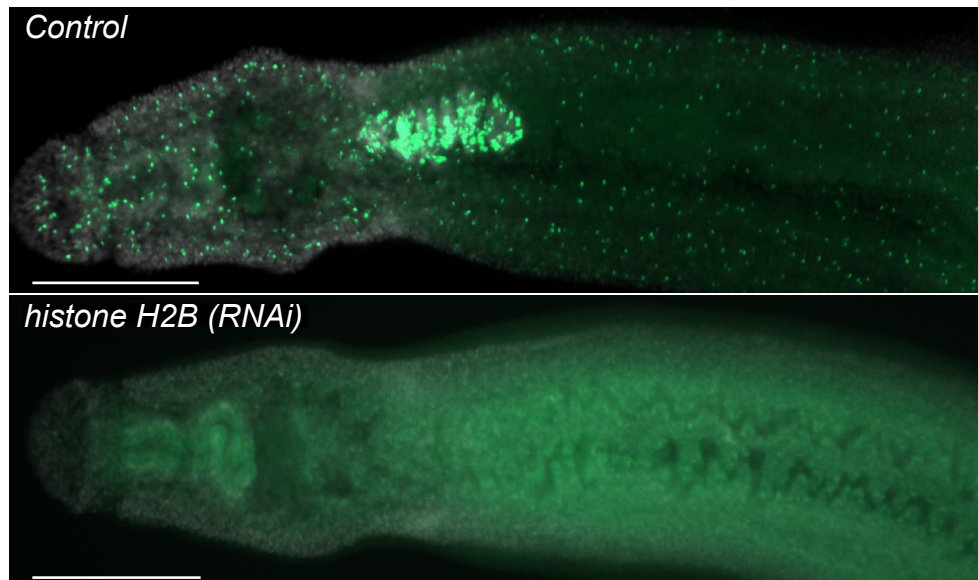

Supplement: supp [file elife-12473-supp-v1.zip]

Figure 2- Figure Supplement 1.

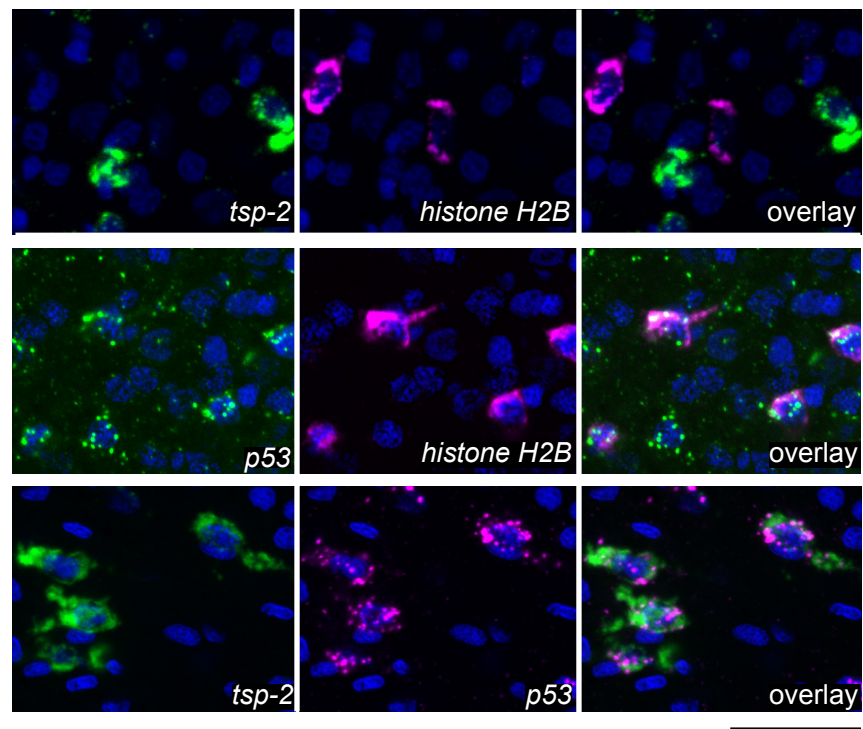

Supplement: supp [file elife-12473-supp-v1.zip]

Figure 1- Figure Supplement 2.

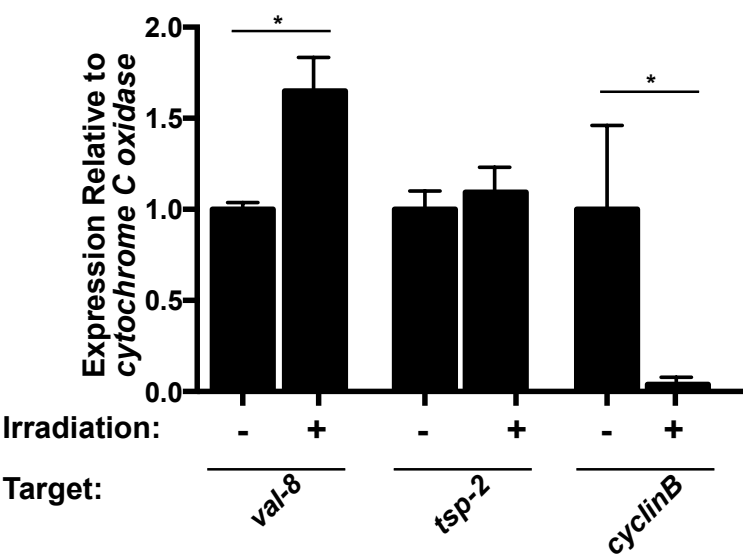

Supplement: supp [file elife-12473-supp-v1.zip]
